# Supplementary material
Source: MDPI journal article supplement (https://www.mdpi.com/2073-4395/10/10/1579)
Supplement: s1 [file s1]

## Sheet: file S1
File S1:
Sequences of SNPs identified in this study and the chromosome they align to
SNP MARKER ID	CHROMOSOME	POSITION	REFERENCE ALLELE	ALTERNATIVE ALLELE	CONTEXT
Ro06-62810	Ro06	62810	C	A	CGCTAATTGGTGCTGACCGTGCAAAGGATCTTGCTGTCTTGAAGGTATTCTTTTTCTTTTTGTGCCATATGAAACCATTCTTGATTTCTGTCCACTTTTG[C/A]CATCCGGTATTCCAATTTCTGCTTAATTCAACATGTCAACTCAATTAACATCTACTTCTGTTATTCTGTTGAATAGTCGATCTGAAGTTCAAAGTCTGAT
Ro06-62955	Ro06	62955	T	G	TTAACATCTACTTCTGTTATTCTGTTGAATAGTCGATCTGAAGTTCAAAGTCTGATTCATTACTTCTGTTTCGTGGTTGCACTTTCTAGTTGCACTATCT[T/G]AGCAGTTTGCCAGTAGCTAGGTACTGATATCTCTAAATTGCTAGGTAGAAGCCTCTAAAGATCTGTTGAGGCCAATTGTTGTGGGGCAGTCATCTTCTTT
Ro06-77167	Ro06	77167	A	C	GATCAATCAAAACCTTTCCCAAACTTTAGTTATCAAATGACATGATAAGGGTATCTAAAGACCCACTGGTCATCAGTGCTTATTTTGAATGAGATATATA[A/C]ACACATCTCTTTCAACACCTTGAGACCTTTTTTTTCAGCTAGAAGAAATTCATTTCAGCGCAAATGACACCAAATACTATAGAAGGGAAGTAGTAAAAGA
Ro06-91461	Ro06	91461	T	C	CAAATGAGTGTTTCTCGAGTTTTTGCATGTCTTGTGAGCTTGTACAAGGAAATCAACTTATCCCAAAGAAGAAACACAGAATCACATTCCATACTACCAA[T/C]GTAGACTGCTTCAGTGCATTTTTCATCCATAGKCTTCYGGAACTGTAGTGCATTCCAAGTGAATAGAATCCTCAGAATGTAATATGAGCATCTGTAATAC
Ro06-91494	Ro06	91494	G	T	GTGAGCTTGTACAAGGAAATCAACTTATCCCAAAGAAGAAACACAGAATCACATTCCATACTACCAAYGTAGACTGCTTCAGTGCATTTTTCATCCATAG[G/T]CTTCYGGAACTGTAGTGCATTCCAAGTGAATAGAATCCTCAGAATGTAATATGAGCATCTGTAATACTTCTCCACATCTAAGAGATCAACCAATGATGTC
Ro06-91499	Ro06	91499	T	C	CTTGTACAAGGAAATCAACTTATCCCAAAGAAGAAACACAGAATCACATTCCATACTACCAAYGTAGACTGCTTCAGTGCATTTTTCATCCATAGKCTTC[T/C]GGAACTGTAGTGCATTCCAAGTGAATAGAATCCTCAGAATGTAATATGAGCATCTGTAATACTTCTCCACATCTAAGAGATCAACCAATGATGTCTGGAG
Ro06-119727	Ro06	119727	T	C	TGAAACTCTTTAAGTTTAATTTAACTGGTCATTTACAAACTTTGGAATGCCTCTAGTAAAAAAAATCTTTAGCATATTTAGAGGGGGATTATCCAAAAAA[T/C]AATGAATTACAAGATCATGCAATGAAGTCATATTAAGCTTGACTTGTCAAGTTAATTAGTCCTTCATCAAACTGGACTGGGTTGTGGAGTATTGCAGTAA
Ro06-148875	Ro06	148875	T	C	TTTCACTGTTGGAAACAGATCCGGTGAATATGCCTGTGCTGCATATGTGACATTCCGAGATGCTTATGCTCTGGAAACTGCTGTATTGCTCAGTGTAAGT[T/C]GCTCGACACTCTACCTTRAACATGCTTCGTGTGTCAAAAAAGTTGCTTTTGCTAACCTACGTGGCTACATTAACCTGAGTTTTGAAAGCATTCTCTCATT
Ro06-148893	Ro06	148893	A	G	ATCCGGTGAATATGCCTGTGCTGCATATGTGACATTCCGAGATGCTTATGCTCTGGAAACTGCTGTATTGCTCAGTGTAAGTYGCTCGACACTCTACCTT[A/G]AACATGCTTCGTGTGTCAAAAAAGTTGCTTTTGCTAACCTACGTGGCTACATTAACCTGAGTTTTGAAAGCATTCTCTCATTCTCAGAGATACTATATGT
Ro06-173585	Ro06	173585	G	A	CTTGGCACCAGAAAAGTGAAAGCAACCATTGATTTCTCCATCCATGGAAAAATGACACAGAGAGTCCCATCAGTTTTCCTTTTGAGGGCATATCTGCTTA[G/A]CTTTCACAGCAGAAGATGGAGGCAAGGAGTGGAAGAGATGACCCATTTTCAACCAATACGGAATCTCATGTGTTCTGCTATATATATATATATTCCCACT
Ro06-186763	Ro06	186763	C	G	CAAAGGATCCAACCTTGAAAGATACTCAGGCTATAAGAACGGTGACATGCATATCACTTGCTCAATATCACTAAAGAGAGATATATCAGAAAAGAGAGTG[C/G]TAGCATACAAGCAGTCCTTCGCCAGGTCTCATGAGACTACAGAGATCAACACAAACCCGATCCCCCATTCCAGCTACTTGGACTCCAGTTACAATGGCTT
Ro06-191664	Ro06	191664	A	C	GATCTTGGAATAAACCTAGCAGTGTAATGGATTAACAATAAAAGTAAAATTTGCAATCAGAGGCAGAAAACATACAGTGGGCTACACGTAAATGAAAGAG[A/C]CTTCACACATGCGAACACTTTTCAGAGAATGCAGAAAATTTTTTAACAATTTTTTCTTTTTGCTGAAAAATCACCACTAGGGTTTCACACTCCTAATTTC
Ro06-208570	Ro06	208570	A	G	CCCACTGCAGATGCAAATGATTATATTGCCACACAAAACTGGTTGAACCACGGTGGAGATTTGTTCAACACAAGACATGCCTCTAAGGAGATCAAGATCA[A/G]CCCCGAAWCGGCTTCGAAACTCCGCCTCAWGTGGAAGTTCTATGCAGGCAGCCACATAACTGCAACGCCAGCAATTTACGACAACAACCTTTATTTCCCG
Ro06-208578	Ro06	208578	A	T	AGATGCAAATGATTATATTGCCACACAAAACTGGTTGAACCACGGTGGAGATTTGTTCAACACAAGACATGCCTCTAAGGAGATCAAGATCARCCCCGAA[A/T]CGGCTTCGAAACTCCGCCTCAWGTGGAAGTTCTATGCAGGCAGCCACATAACTGCAACGCCAGCAATTTACGACAACAACCTTTATTTCCCGAGCTGGAA
Ro06-208600	Ro06	208600	A	T	ACACAAAACTGGTTGAACCACGGTGGAGATTTGTTCAACACAAGACATGCCTCTAAGGAGATCAAGATCARCCCCGAAWCGGCTTCGAAACTCCGCCTCA[A/T]GTGGAAGTTCTATGCAGGCAGCCACATAACTGCAACGCCAGCAATTTACGACAACAACCTTTATTTCCCGAGCTGGAATGGTTACATCTACGCCGTTAGA
Ro06-212983	Ro06	212983	T	C	CGAACAGGAGCAATCTTGTGGCAGACCTTCATGCTACCAGACAACTTTGGCAAGTTTGGAGAGTATGCTGGAGCAGCAATCTGGGGAAGCAGTCCTTCTA[T/C]CGACGTCGCGAGGAACCATGTCTACATTGCCACATCAAACATGTATTCAGCTCCTCAGCGTGTAATTGAATGCCAGGAGAGGGAAAACAATCAAACAGTG
Ro06-252194	Ro06	252194	C	G	TCTTTTGTGTTCATGGTTGCAACACTTCTCCTTCTCGGCTTTTATATTAGATCTAGAGAACACAAACTCTTCAGAAATAAGAGTAAGCAATTTTGAAGCT[C/G]TTTAGAGGAAATAGAGGAAATGAGGTTTGTATCTTTTGAATGCAATACTACACATGTACTTCTGTAAGGAACTTGATCAGATCAGGAACTAGTATTTGGT
Ro06-262240	Ro06	262240	T	C	GATGAAGATTTTGTTATTGACAAGGATGATGGAGGTTCTCCAACTGATGATTCTGGGGGGGAAGATTCTGATGCTAGTGAAAGTGGAGGCGAGAAAGAGG[T/C]AAGTGATTTTTATCACATGTGAATTTGCTTAACATTTTACAATCTATTCTCACATACATGAATTGCCAATTTCAGAAGCCTGCTAAAAAGGAGCTCAAGA
Ro06-264351	Ro06	264351	G	T	CGTCCCCATTTTTTATATATGCTATGCAGCATCAGCATCAGCATCATCTAATTTAACATGCCCTGCCAACCTTGCAACCAAGAGAACCCGCAAAGCGTGT[G/T]AGCCTCTTGACGAATGTGCCTGGCTTGGCTTTGATCATGTCGAGCCGCCCGAACTCTCTGCCAATCCTGGGCACTCCGGATTCGCTGAAGAAGGCTCCGT
Ro06-273196	Ro06	273196	T	A	TGATCTGTCATTTGACAGCAAAACTGGGAATTTCACCAAATGCAATGCTGGTTTGAGCTTCTCCAATGCAGATCTAATTGCTTCATTGAACCTGTTAGTA[T/A]TCTGTTTTCTTAATAAACACTTGTTCTTGCATTATGCATGGATATAACTCCCTCYCTCCCTACCCCCAACAAAGGATAAATGGATTGTATCCTCAATACT
Ro06-273251	Ro06	273251	C	T	AGCTTCTCCAATGCAGATCTAATTGCTTCATTGAACCTGTTAGTAWTCTGTTTTCTTAATAAACACTTGTTCTTGCATTATGCATGGATATAACTCCCTC[C/T]CTCCCTACCCCCAACAAAGGATAAATGGATTGTATCCTCAATACTTGTGAAATTCGTCGTATTAGATAGAATCTATGTTGCTGTTCAGGCTTACATGCTA
Ro06-298644	Ro06	298644	C	T	AAAACTCCTGTATCGTGGCATGCCACATTGGACCAGGTTCCTTCAGGATGTATGTGGTTATGATCTCATTGATATTCCAAAAAAAAAAAGATGAGCTGAT[C/T]CACACKCTTGTTTGTCTTAGAAATTGAATGAAATGASCTTTAGTTTGTGTTTGTGCAACTTCTTTGCAGTTATTTATTCCGAACTGAAGCTTTTGTTTTA
Ro06-298650	Ro06	298650	T	G	CCTGTATCGTGGCATGCCACATTGGACCAGGTTCCTTCAGGATGTATGTGGTTATGATCTCATTGATATTCCAAAAAAAAAAAGATGAGCTGATYCACAC[T/G]CTTGTTTGTCTTAGAAATTGAATGAAATGASCTTTAGTTTGTGTTTGTGCAACTTCTTTGCAGTTATTTATTCCGAACTGAAGCTTTTGTTTTAAACTTG
Ro06-298681	Ro06	298681	C	G	TTCCTTCAGGATGTATGTGGTTATGATCTCATTGATATTCCAAAAAAAAAAAGATGAGCTGATYCACACKCTTGTTTGTCTTAGAAATTGAATGAAATGA[C/G]CTTTAGTTTGTGTTTGTGCAACTTCTTTGCAGTTATTTATTCCGAACTGAAGCTTTTGTTTTAAACTTGATATGCAAAWAGGACATGCACTAGTGATATC
Ro06-298760	Ro06	298760	A	T	CTTAGAAATTGAATGAAATGASCTTTAGTTTGTGTTTGTGCAACTTCTTTGCAGTTATTTATTCCGAACTGAAGCTTTTGTTTTAAACTTGATATGCAAA[A/T]AGGACATGCACTAGTGATATCGGATGTGTTGTGTCTTTTTACTATTTGACTCGTGATTTTCACCTTGCATTCTGTTCAAATACTATAGCATGCTAAAAGT
Ro06-298868	Ro06	298868	A	G	GCACTAGTGATATCGGATGTGTTGTGTCTTTTTACTATTTGACTCGTGATTTTCACCTTGCATTCTGTTCAAATACTATAGCATGCTAAAAGTAACTCAA[A/G]TTAACTCGACACRATATACATCAATGGTGTTATTGTTGTAKTGCTTAATATAATGATCATATGATAAGTTTATWGTAATCACTCCCTTATTATGATGGGG
Ro06-298881	Ro06	298881	G	A	CGGATGTGTTGTGTCTTTTTACTATTTGACTCGTGATTTTCACCTTGCATTCTGTTCAAATACTATAGCATGCTAAAAGTAACTCAARTTAACTCGACAC[G/A]ATATACATCAATGGTGTTATTGTTGTAKTGCTTAATATAATGATCATATGATAAGTTTATWGTAATCACTCCCTTATTATGATGGGGCCATTCTCTTTTA
Ro06-298909	Ro06	298909	T	G	ACTCGTGATTTTCACCTTGCATTCTGTTCAAATACTATAGCATGCTAAAAGTAACTCAARTTAACTCGACACRATATACATCAATGGTGTTATTGTTGTA[T/G]TGCTTAATATAATGATCATATGATAAGTTTATWGTAATCACTCCCTTATTATGATGGGGCCATTCTCTTTTAACTTTTTTACCGCATTACTAAGATGGTG
Ro06-298942	Ro06	298942	T	A	ACTATAGCATGCTAAAAGTAACTCAARTTAACTCGACACRATATACATCAATGGTGTTATTGTTGTAKTGCTTAATATAATGATCATATGATAAGTTTAT[T/A]GTAATCACTCCCTTATTATGATGGGGCCATTCTCTTTTAACTTTTTTACCGCATTACTAAGATGGTGTAGTGTATGTGAGAACTTAGAAGCTTGAATATG
Ro06-301665	Ro06	301665	A	G	GTCTTTGTGGCACTATATACATATTGTAAAACTACAATATAAGGCTGCCAAGATTACATAGAGCTATGTTGCTTCAAGCAAATCCATACATAAGACTCTA[A/G]ACCCCAAGGTGTGGAGTTGAAAAGCGAAATCATTCATATCTCAGACGGTGTATGATTGGTGAATTGTGTCTATGTCCAGRCCTTTCAGCCTCACCACTGA
Ro06-301745	Ro06	301745	G	A	AATCCATACATAAGACTCTARACCCCAAGGTGTGGAGTTGAAAAGCGAAATCATTCATATCTCAGACGGTGTATGATTGGTGAATTGTGTCTATGTCCAG[G/A]CCTTTCAGCCTCACCACTGATTCGACATGCCCTTTAAGGGTGTGCAACTCCCTCAGTCTGCAGAAAAAGCGTACCAATTCACATATCTTCCTATCATACT
Ro06-303802	Ro06	303802	G	A	GCTTTTTCAATAAGCTCATCAACTGGCAAACCAGCAACCGACTCGTCCTTTTTCTGTCCCAAAAGAGTTGATGAAGGGTACATGTTTGTTCCCATACCCA[G/A]ACGGCGTCCTGTCTCCTTTGCTATTGCCAGTTGATCACCTGTAATCATCTTGACACTTACACCAAGATTCAATGCCCTTCTAATTGTCTCTGCACTATCA
Ro06-331320	Ro06	331320	T	A	TGTCATGGTGGCTTCTGAACCGTACCACTTTGGCGTTTTTGAAAAACTCCATATCTAACGCACTGTGAAGCAATAGCATCATATGTACGTTTGAACAAAA[T/A]TATTATTGAAAATGAGTGATATATTTGTGTTTGAAATTTTGAATGTAATTCGTATATACWTACGTACCTTGAACTAAGAGACTGATATATATGAAGCAAA
Ro06-331380	Ro06	331380	T	A	CACTGTGAAGCAATAGCATCATATGTACGTTTGAACAAAAWTATTATTGAAAATGAGTGATATATTTGTGTTTGAAATTTTGAATGTAATTCGTATATAC[T/A]TACGTACCTTGAACTAAGAGACTGATATATATGAAGCAAATATGCGCCTTACGTGATGGTTCTTAATGCATGCAAGAATTAGAAATTAAGGGGTTAGATC
Ro06-339030	Ro06	339030	G	C	ACGACGATGAAGTTGAGTTGCAGTGGGCCGCCATTGAGAGGTTGCCAACATTCGAGCGCATTAGGACTTCGCTGTTTGACTGCAGCAAAGATCATGAGCA[G/C]GAAGATGAGGCTAGTAACAAGAGTAAGATGGTACAGATTGATGTTACGAAGCTAGGATCACCGGAGCGCCATGTGTTCATTGAAAAATTGATCAAGGAAA
Ro06-347546	Ro06	347546	T	C	CAAAATCTATTTCAAGCAATGAAAGTTTCTGATCTTGGTTGTGCTTCTCTTCTGAAATCCATACTTTGCTCTGTAAGAGAATCTAATTAAAGATATAATT[T/C]TCAATTAGTATTAGTACATGTTTCCTTATTGTTGCTAGCTACTTTAGTGTTATATATGGAACCATTTTTCAACAATTCACATGTTTGAACCCAATATGCA
Ro06-349454	Ro06	349454	A	G	TATTTTGATGACCAATAAGACTTTCCATAACGAAGCTAACTGTTTCTGTGCTTACAGGTATCTTTATGCGGATTTGTATGCTGGAAGCATATGGGTAGGT[A/G]CAGAAACTCCTGAAGATAGCGGAAACTTCACTAGTACAAAAGTTCCGGTCAGCTGTGCTCTGGACTCTCCTATCCTGTGCAGTGCTGAGGCAGGAAGCTC
Ro06-349576	Ro06	349576	A	C	GAAACTTCACTAGTACAAAAGTTCCGGTCAGCTGTGCTCTGGACTCTCCTATCCTGTGCAGTGCTGAGGCAGGAAGCTCTGTTCCTGCATTGGGGTTCAT[A/C]TTCTCCTTTGGTCAGGATAACAGGAAAGACATGTTTATCTTGGCCAGTACCGGTGTATATAGAGTTGCTAGGCCTAGTCGGTGCAACTACACTTGCTCCA
Ro06-365142	Ro06	365142	G	A	GGTCTAGCACAAGAATGATCTCCATTATACCAAGGCTAAAGATTAACCTGCAGCTGCGCTTAGTTGCTACTTTTCTTCTCTTTTCCTTGGCTATGTGTTG[G/A]GTCATGCCCCRGCATSACCRTGAAACAGGCGCAGAGTTTATTGCCAAAGACTCAAATTTAGGCAGATMATAATGCACCGAGCTCTAAAGCAATATTATCA
Ro06-365153	Ro06	365153	A	G	AGAATGATCTCCATTATACCAAGGCTAAAGATTAACCTGCAGCTGCGCTTAGTTGCTACTTTTCTTCTCTTTTCCTTGGCTATGTGTTGRGTCATGCCCC[A/G]GCATSACCRTGAAACAGGCGCAGAGTTTATTGCCAAAGACTCAAATTTAGGCAGATMATAATGCACCGAGCTCTAAAGCAATATTATCAYATCAGGCGTG
Ro06-365158	Ro06	365158	C	G	GATCTCCATTATACCAAGGCTAAAGATTAACCTGCAGCTGCGCTTAGTTGCTACTTTTCTTCTCTTTTCCTTGGCTATGTGTTGRGTCATGCCCCRGCAT[C/G]ACCRTGAAACAGGCGCAGAGTTTATTGCCAAAGACTCAAATTTAGGCAGATMATAATGCACCGAGCTCTAAAGCAATATTATCAYATCAGGCGTGCATGT
Ro06-365162	Ro06	365162	G	A	TCCATTATACCAAGGCTAAAGATTAACCTGCAGCTGCGCTTAGTTGCTACTTTTCTTCTCTTTTCCTTGGCTATGTGTTGRGTCATGCCCCRGCATSACC[G/A]TGAAACAGGCGCAGAGTTTATTGCCAAAGACTCAAATTTAGGCAGATMATAATGCACCGAGCTCTAAAGCAATATTATCAYATCAGGCGTGCATGTATAG
Ro06-365210	Ro06	365210	C	A	ACTTTTCTTCTCTTTTCCTTGGCTATGTGTTGRGTCATGCCCCRGCATSACCRTGAAACAGGCGCAGAGTTTATTGCCAAAGACTCAAATTTAGGCAGAT[C/A]ATAATGCACCGAGCTCTAAAGCAATATTATCAYATCAGGCGTGCATGTATAGTTTAGAGTTTAGACAAGCTATTGAAAACAATCATCAGCCTATGCATTC
Ro06-365243	Ro06	365243	C	T	GTCATGCCCCRGCATSACCRTGAAACAGGCGCAGAGTTTATTGCCAAAGACTCAAATTTAGGCAGATMATAATGCACCGAGCTCTAAAGCAATATTATCA[C/T]ATCAGGCGTGCATGTATAGTTTAGAGTTTAGACAAGCTATTGAAAACAATCATCAGCCTATGCATTCATGATTACATCTCCCAAACTATTCTATACAACG
Ro06-375032	Ro06	375032	C	A	TATTGGAATGTGTAGCACTACTCTAGATGAAATGGTCTCCATTAATTAATTATCTACCTAATTATCTAGCCTCACAGTGCATGCAGTAGTGTTAAATCAG[C/A]GATGAATTAATTCTTAATAATGATTAGCATAGAAGAGTGAATTATATCATGGGGAGGACAAGAGAATAATTAATTAATTATAKGACAAAGAGATCGAGGA
Ro06-375115	Ro06	375115	G	T	CAGTAGTGTTAAATCAGMGATGAATTAATTCTTAATAATGATTAGCATAGAAGAGTGAATTATATCATGGGGAGGACAAGAGAATAATTAATTAATTATA[G/T]GACAAAGAGATCGAGGAACAAAGTAATTRAAGTAGGAAAACTAATTAAGAAGATATATGTACGTATAATGAAGATAGATTTAGCCTTTAGGTATACCATC
Ro06-375144	Ro06	375144	A	G	TCTTAATAATGATTAGCATAGAAGAGTGAATTATATCATGGGGAGGACAAGAGAATAATTAATTAATTATAKGACAAAGAGATCGAGGAACAAAGTAATT[A/G]AAGTAGGAAAACTAATTAAGAAGATATATGTACGTATAATGAAGATAGATTTAGCCTTTAGGTATACCATCTTGTTCACCGTACTTCGGGCTTCTAATTT
Ro06-379984	Ro06	379984	A	G	TGCTCAAACCTTAACAAAATAACTGGTATCTTGGAAATACATGTACCATATATGGGGCATAGATACACAAATGGGGATGCAAGATTTGATTTTTACCTTA[A/G]ATAGGAGATGAATTTGATTGCTTTATAAATAGTTAAATGTGGAGTTGCAGAATGATGCATACAGCTAATTCTCAATTTACACAAAACCCTTTATATCTTA
Ro06-386703	Ro06	386703	T	C	TTAACGACTGACGAATGTTACTCTCTCTCTCTCTCTCTCTCTCTTGCAGATAGCTTCTGCTATTACTGATCATCATCATAGAGTGGTGCAATGAATGAAT[T/C]TGCTGCGGGATGAGTTTTGATGCAAACAGGCGGCGCAGTATATGATGAATATTCACATGCAAATTTGAGGGCAAAAATGGAATTTTATCTGGCCACAGTA
Ro06-392494	Ro06	392494	A	C	ATCAGCTTTCATCCTAATATGCATGCCACGGTTAGAGACACGATGATGTCGTCTGAGCTAGTGATCTCATATAGCATGCATGCAGCTAGCTAAGGTGAGA[A/C]TGAGACAGAAAGATTCTAATTTGCTAGCTGCATATATGGCTTTTGGCTTTTTCTGTCGTTTGAATATTCTAATATACTAGTACTAACCTTCTATTGAAAA
Ro06-429847	Ro06	429847	T	C	TTACAGTTATACTTTCGCGGAAATGAGATGGAAGCTCTGAGTAACTTTCAGAAAGCTTAAAGTACATAACCAAATTCATTCCTTCTCCATCATGTTCGCT[T/C]TGAAACATAGAGATAGGATACAAAGGTATCTGCAGTACAAAAACATGCACATAGAATATTAGAAATATTACTTAGAAAAAAAAAACTATTTCCTATATGA
Ro06-451516	Ro06	451516	C	T	AGAGACGTTTAAATTAATCGGAGATTTAAATCATTTTTGTCAATATTTGGTGGTACCGAGCCGTCAATGTTGCAGTTGGGAGAGTAGCTAGCTAGAGGTT[C/T]AAGCATGCTCTAATATCTAAATGCATTACAAATTGTAGCTAGGTGGTCAGCCTTGAATACTCTAAAGCTAGCATGCATATATATATATATATAGATCAAA
Ro06-457772	Ro06	457772	A	C	GACAGTGATTTCAGCTAGCCTTTGGCATGCTGGGTTGTTTCAGGCAGGCTTCGTTAGTGTCAAGAATTCTTTTCATTCTTCATTCACAGTACCCTTTTTC[A/C]MCTTTTTTTTTCCTATGATTGGGCAATGTGAGTAGATCTACAAATGCAAGAAGGTAATAGATTCTAAATGTAATTACATGCATAAAATTACCTTCGATTT
Ro06-457773	Ro06	457773	C	A	ACAGTGATTTCAGCTAGCCTTTGGCATGCTGGGTTGTTTCAGGCAGGCTTCGTTAGTGTCAAGAATTCTTTTCATTCTTCATTCACAGTACCCTTTTTCM[C/A]CTTTTTTTTTCCTATGATTGGGCAATGTGAGTAGATCTACAAATGCAAGAAGGTAATAGATTCTAAATGTAATTACATGCATAAAATTACCTTCGATTTA
Ro06-467342	Ro06	467342	G	T	AAAGACCTCAGGAAAGTACCAAACGGATGGTGAGGAAGCTGTTCCGTCCAAATTGGGGATGTGAAAAAGCAACGGTGGAGGGCTGCCTGCTTTTTACTCC[G/T]GAAGATCACCAAGTAGGAGCAAGTGGGTATATAATTCCTATCTTCTTTCAGGTGTAGGCAACATGTTAGATGAAATGCATCAAAGAGGTTGAAGTAGGCA
Ro06-471587	Ro06	471587	G	C	CTGTAACTATAGCTTGGACGATGGCCCTAATAATTGCATGGAGGCTTGCCCTAGTCGTCATCGCCGTCCAACCCATAGTCATTCTCGGCATTTATTCTAG[G/C]CGTGTCCTGCTCAAAAGCATGTCCAGCAAAGCCATCAAATCCCAAGAGGAAAGTTGCAAGCTTGCAGCTGAAGCTATCTACAACCTCAGGACCATTACTG
Ro06-479969	Ro06	479969	A	G	ATTGTAAATTGACAATTATAACCAAATTTATGAGATATTTTGATAATTATGCCAAAAAACAATGGAGCTCCAACCATCAACTTCACGGTCTTCAGATTCC[A/G]CMGTGAAAAGTGTACTGCTTGTATCAGTTGGCATTTGGCATTGGCAAAACCGCAAAAGAATGGATGGTATAAGCTAGCTAGTTTGAAAAGTTCTGATTCA
Ro06-479971	Ro06	479971	A	C	TGTAAATTGACAATTATAACCAAATTTATGAGATATTTTGATAATTATGCCAAAAAACAATGGAGCTCCAACCATCAACTTCACGGTCTTCAGATTCCRC[A/C]GTGAAAAGTGTACTGCTTGTATCAGTTGGCATTTGGCATTGGCAAAACCGCAAAAGAATGGATGGTATAAGCTAGCTAGTTTGAAAAGTTCTGATTCAGT
Ro06-480073	Ro06	480073	C	A	TGAAAAGTGTACTGCTTGTATCAGTTGGCATTTGGCATTGGCAAAACCGCAAAAGAATGGATGGTATAAGCTAGCTAGTTTGAAAAGTTCTGATTCAGTA[C/A]TGGTTGTGAGTCACGTRCATGTTTTCTTCGATTCTTCTTTTGCCAGTGTTATAATTGTACTTATTTCACCTCATTTCATAGAGCTTCAGTTGATATTCCA
Ro06-480090	Ro06	480090	A	G	GTATCAGTTGGCATTTGGCATTGGCAAAACCGCAAAAGAATGGATGGTATAAGCTAGCTAGTTTGAAAAGTTCTGATTCAGTAMTGGTTGTGAGTCACGT[A/G]CATGTTTTCTTCGATTCTTCTTTTGCCAGTGTTATAATTGTACTTATTTCACCTCATTTCATAGAGCTTCAGTTGATATTCCAACGTACTCCCATGATTG
Ro06-483151	Ro06	483151	G	A	ACCACCATATGCGGTCGATCGAATGATCGATCTGGAACGAATTAAGGGGCTGCTGCAATATTGCATACATAGCCTTGGTGCTAGCTCTAACAGATCGAAA[G/A]RCCATTGCATGCGCATGCTTTCCTTACAGAATTGGATCAACGCACGATAACACACGTGTCACTATCTGGTTAATGCATGTTCTGGGTGCCCCGTACCCAT
Ro06-483152	Ro06	483152	G	A	CCACCATATGCGGTCGATCGAATGATCGATCTGGAACGAATTAAGGGGCTGCTGCAATATTGCATACATAGCCTTGGTGCTAGCTCTAACAGATCGAAAR[G/A]CCATTGCATGCGCATGCTTTCCTTACAGAATTGGATCAACGCACGATAACACACGTGTCACTATCTGGTTAATGCATGTTCTGGGTGCCCCGTACCCATT
Ro06-489957	Ro06	489957	C	G	AAGATCAGATCGTAGAAGTGAAGAAGCTGCCTGTCCCGTCATTTCGAAGATTGGTGTCTTTGAACCTTCCGGAGTGGAAACAAGCGCTTTTGGGGTGCTC[C/G]AGTGCGGTGCTTTTTGGTGCAGTTCAGCCAGTATATGCATTCGCCATGGGGTCGATGGTGTCGGTTTATTTCTTGACAGATCACGATGAGATCAAGCAGA
Ro06-490699	Ro06	490699	A	G	TTGGTCATTGCATGGAGACTTGCCTCAGTCATGATAGCAATCCAACCCATTATCATTGTGAGCTTCTACACCAGGCGTGTAATGCTCAAGAGCATGTCCA[A/G]SAAAGCTATAAAAGCTCARGATGAAAGTAGCAAGCTAGCTGCAGAAGCAGTCTCCAACCTCAGGACCATCACTGCCTTCTCGTCTCAGGACCGCCTGTTG
Ro06-490700	Ro06	490700	G	C	TGGTCATTGCATGGAGACTTGCCTCAGTCATGATAGCAATCCAACCCATTATCATTGTGAGCTTCTACACCAGGCGTGTAATGCTCAAGAGCATGTCCAR[G/C]AAAGCTATAAAAGCTCARGATGAAAGTAGCAAGCTAGCTGCAGAAGCAGTCTCCAACCTCAGGACCATCACTGCCTTCTCGTCTCAGGACCGCCTGTTGA
Ro06-490718	Ro06	490718	G	A	TTGCCTCAGTCATGATAGCAATCCAACCCATTATCATTGTGAGCTTCTACACCAGGCGTGTAATGCTCAAGAGCATGTCCARSAAAGCTATAAAAGCTCA[G/A]GATGAAAGTAGCAAGCTAGCTGCAGAAGCAGTCTCCAACCTCAGGACCATCACTGCCTTCTCGTCTCAGGACCGCCTGTTGAAAATGCTCGAAAAGGCGC
Ro06-544635	Ro06	544635	C	T	TTTTACTTTAGGATCTAGTGTCTAGGGTTAGGTTTTGGATTAGGATTAATTAGGGCTTGTTTTTTAAGGTTCCCCTTAGGTATACTAATGTATCTAGTAG[C/T]GGTKGCCGGTAGACTACATCCCTACCTAAAACTCCATTCTGCTAGGAAAGGAAACTAGTATACATTGTACGTATTAATACATTAATGCATGAAGACTTTC
Ro06-544639	Ro06	544639	G	T	ACTTTAGGATCTAGTGTCTAGGGTTAGGTTTTGGATTAGGATTAATTAGGGCTTGTTTTTTAAGGTTCCCCTTAGGTATACTAATGTATCTAGTAGYGGT[G/T]GCCGGTAGACTACATCCCTACCTAAAACTCCATTCTGCTAGGAAAGGAAACTAGTATACATTGTACGTATTAATACATTAATGCATGAAGACTTTCTCAG
Ro06-569603	Ro06	569603	A	C	AGAACAGGTGAGATCTAAATATGATGTTCAGCCTGTTCATAGAGCGATCATGGCTCGTGAAGGAACACGCCAAACAGTGGTCCTTTTTAATTCTTTGGAG[A/C]ARACAAGAGAAGAGGTTGTGATGGTTATTGTTAACCGGCCAGATGTTACTGTTCTGGACTTGAACTGGACATGTGTTCCAAGCCAAATATCCCCTGAAGT
Ro06-569605	Ro06	569605	G	A	AACAGGTGAGATCTAAATATGATGTTCAGCCTGTTCATAGAGCGATCATGGCTCGTGAAGGAACACGCCAAACAGTGGTCCTTTTTAATTCTTTGGAGMA[G/A]ACAAGAGAAGAGGTTGTGATGGTTATTGTTAACCGGCCAGATGTTACTGTTCTGGACTTGAACTGGACATGTGTTCCAAGCCAAATATCCCCTGAAGTGC
Ro06-570613	Ro06	570613	A	C	TGCTTGATCGTCGTTTGGTAAGAGATGACGGACGTGGTCTTGGACAAGGAGTGATGGACAACCGTGCAATGAATGTAATCTTCCACATCCTTGTGGAGTC[A/C]AACATTTCTTYCGCATCAAATCCAGTTTCCAACCCACTTCCCTTAAGCCCCTCTCTTCTTTCCCATCGTGTCGRTGCTGRCCTGAACTATCCATTGCATG
Ro06-570624	Ro06	570624	C	T	CGTTTGGTAAGAGATGACGGACGTGGTCTTGGACAAGGAGTGATGGACAACCGTGCAATGAATGTAATCTTCCACATCCTTGTGGAGTCMAACATTTCTT[C/T]CGCATCAAATCCAGTTTCCAACCCACTTCCCTTAAGCCCCTCTCTTCTTTCCCATCGTGTCGRTGCTGRCCTGAACTATCCATTGCATGCATTCATTTCC
Ro06-570687	Ro06	570687	G	A	GTAATCTTCCACATCCTTGTGGAGTCMAACATTTCTTYCGCATCAAATCCAGTTTCCAACCCACTTCCCTTAAGCCCCTCTCTTCTTTCCCATCGTGTCG[G/A]TGCTGRCCTGAACTATCCATTGCATGCATTCATTTCCAAGAAGCCAGAGGATTTATCAGTGCAACCACCCCCGAGGTCATTCTCACCCTTRGCTGCACCC
Ro06-570693	Ro06	570693	A	G	TTCCACATCCTTGTGGAGTCMAACATTTCTTYCGCATCAAATCCAGTTTCCAACCCACTTCCCTTAAGCCCCTCTCTTCTTTCCCATCGTGTCGRTGCTG[A/G]CCTGAACTATCCATTGCATGCATTCATTTCCAAGAAGCCAGAGGATTTATCAGTGCAACCACCCCCGAGGTCATTCTCACCCTTRGCTGCACCCTTACCG
Ro06-570778	Ro06	570778	A	G	ATCGTGTCGRTGCTGRCCTGAACTATCCATTGCATGCATTCATTTCCAAGAAGCCAGAGGATTTATCAGTGCAACCACCCCCGAGGTCATTCTCACCCTT[A/G]GCTGCACCCTTACCGTGTGATCTGCATATTGTAAGTTTAAAGGTTCCCCAACCTTTAAAATTCTCTCAGCTACCACTTGAAGATTCKAGGTTTGTCCTAA
Ro06-570865	Ro06	570865	T	G	CATTCTCACCCTTRGCTGCACCCTTACCGTGTGATCTGCATATTGTAAGTTTAAAGGTTCCCCAACCTTTAAAATTCTCTCAGCTACCACTTGAAGATTC[T/G]AGGTTTGTCCTAACATTACAGAGACGAAACTGGGAYTCTTCATATTGCCGGAAGGGCAGAWCTGATTGCACTAGGTTTGCTGATGAGACCGTGAATTTGC
Ro06-570901	Ro06	570901	C	T	TGCATATTGTAAGTTTAAAGGTTCCCCAACCTTTAAAATTCTCTCAGCTACCACTTGAAGATTCKAGGTTTGTCCTAACATTACAGAGACGAAACTGGGA[C/T]TCTTCATATTGCCGGAAGGGCAGAWCTGATTGCACTAGGTTTGCTGATGAGACCGTGAATTTGCTTAACATGTTTAGGGAGCTCACTGTATCAAATGCGA
Ro06-570926	Ro06	570926	T	A	CCAACCTTTAAAATTCTCTCAGCTACCACTTGAAGATTCKAGGTTTGTCCTAACATTACAGAGACGAAACTGGGAYTCTTCATATTGCCGGAAGGGCAGA[T/A]CTGATTGCACTAGGTTTGCTGATGAGACCGTGAATTTGCTTAACATGTTTAGGGAGCTCACTGTATCAAATGCGAGAGGCACTTCCTTAAATCTCTTACA
Ro06-581939	Ro06	581939	C	T	TGATGCGTGCTGTGTGGAGCTGCGTGTCGTATGCATGCTCTGGCTTCATCACCTATTCGCGGTAACGCATGCTGTCACTTAGCTCAACTGCTTTCCCTAG[C/T]TCCTAAACGTAACTTACGCATCCAAAACGCACTAACAAGTACTTTGCTTGCCTCTTTCTTGTTTRGTTTCGGGTTTCGACAGAAAAGAAMMAAATAACTT
Ro06-582004	Ro06	582004	G	A	CGCATGCTGTCACTTAGCTCAACTGCTTTCCCTAGYTCCTAAACGTAACTTACGCATCCAAAACGCACTAACAAGTACTTTGCTTGCCTCTTTCTTGTTT[G/A]GTTTCGGGTTTCGACAGAAAAGAAMMAAATAACTTTGTAACAAACTMGCTGAGAGAACACATAGACCTCATGTTTGAGCAAAAGTAAAGAGAGAAAATGA
Ro06-582029	Ro06	582029	A	C	CTTTCCCTAGYTCCTAAACGTAACTTACGCATCCAAAACGCACTAACAAGTACTTTGCTTGCCTCTTTCTTGTTTRGTTTCGGGTTTCGACAGAAAAGAA[A/C]MAAATAACTTTGTAACAAACTMGCTGAGAGAACACATAGACCTCATGTTTGAGCAAAAGTAAAGAGAGAAAATGAAAAAAAAAAAATAAATCTGATTCAA
Ro06-582030	Ro06	582030	C	A	TTTCCCTAGYTCCTAAACGTAACTTACGCATCCAAAACGCACTAACAAGTACTTTGCTTGCCTCTTTCTTGTTTRGTTTCGGGTTTCGACAGAAAAGAAM[C/A]AAATAACTTTGTAACAAACTMGCTGAGAGAACACATAGACCTCATGTTTGAGCAAAAGTAAAGAGAGAAAATGAAAAAAAAAAAATAAATCTGATTCAAA
Ro06-582051	Ro06	582051	C	A	ACTTACGCATCCAAAACGCACTAACAAGTACTTTGCTTGCCTCTTTCTTGTTTRGTTTCGGGTTTCGACAGAAAAGAAMMAAATAACTTTGTAACAAACT[C/A]GCTGAGAGAACACATAGACCTCATGTTTGAGCAAAAGTAAAGAGAGAAAATGAAAAAAAAAAAATAAATCTGATTCAAAATGGTAGAAGTTTCATGATCA
Ro06-606153	Ro06	606153	C	A	CCATTTCCCCCCCAGTATATATATTGAACTTAATAAGAAGATTCAGATCTATACTGAGTATTGAGGGAAGATTCTCTTTGCTTTGTACAAAAGCAAAAAA[C/A]AAATATTTGGTCCTCAAAAGTATCTCTCTAGCTACTCTCTAGCTATATATTCCCTGCATATRTAGAAGTGCTTACATGTAGAAACGTGCACTGTCCATAT
Ro06-606215	Ro06	606215	G	A	GAGGGAAGATTCTCTTTGCTTTGTACAAAAGCAAAAAAMAAATATTTGGTCCTCAAAAGTATCTCTCTAGCTACTCTCTAGCTATATATTCCCTGCATAT[G/A]TAGAAGTGCTTACATGTAGAAACGTGCACTGTCCATATAGTGACTCTTCGTCTTCCACACTGCAGAGCTTTTATATCCCATTAATATAAGTCTGTTGGGG
Ro06-610063	Ro06	610063	T	G	AGGTAATGTATACACCATTGTTAGTTAATCAATTGTGGTCGGTTTGAGATAAATCTTATGTAGCCCTTTTGTTTGACTAAGGTTGTTTATGATCATATTA[T/G]AGTTCTAYAAATTTGTTGGAACAAGATATATAGTTCAAATAGCTGTTAAGTTATTGCACATAGAATGTTTTTCTATATGAATTTTGGATCTGTGTCAATA
Ro06-610071	Ro06	610071	T	C	TATACACCATTGTTAGTTAATCAATTGTGGTCGGTTTGAGATAAATCTTATGTAGCCCTTTTGTTTGACTAAGGTTGTTTATGATCATATTAKAGTTCTA[T/C]AAATTTGTTGGAACAAGATATATAGTTCAAATAGCTGTTAAGTTATTGCACATAGAATGTTTTTCTATATGAATTTTGGATCTGTGTCAATATTTATCAC
Ro06-612681	Ro06	612681	G	A	GAAACTTTGGTGAGCTGCACTCAGCGTCATCATTCCGGTCAGTTGATGCTCCTAGAGCTGGCCAGTTCCTGAGAAATGGTATGGTTGGTTCATCTCAGCC[G/A]ACAGATTCCTTACGTTTCACAATGAAATCTACCCCTCAAACTGCCAAGCCAGTTGGACAGCTCGTGCCAACAAATTACAGCATGCAAAAAGTTTCTTATA
Ro06-633694	Ro06	633694	C	T	TTATGTATCTTAATTTGCTGAGAATATCTATATATGTACAATTAATTATAATTAAATTGAGTGGCATGCTCCTACCTTTGACATCCTCATCTTGACAAAA[C/T]TTTGTAGCTAAAGTAGTCTTCCCACATCCTCCAGGAGCTGTCAGCACAAGCCTTGATACGTCCTCCTGAAGMAGCTTTATCTTCAATGCCTCCAAAGGAA
Ro06-633766	Ro06	633766	A	C	TACCTTTGACATCCTCATCTTGACAAAAYTTTGTAGCTAAAGTAGTCTTCCCACATCCTCCAGGAGCTGTCAGCACAAGCCTTGATACGTCCTCCTGAAG[A/C]AGCTTTATCTTCAATGCCTCCAAAGGAACATCCAACCCAACCGTCAGCGGCGGTAGTTCAGGTACTGTACACCACGCTTTGATTTCGGTAGACTGGTTTT
Ro06-638591	Ro06	638591	A	C	CTAAGCTAACAGCTCATTCCTAATGATCTACACATGAATACAGCTACATCTTTACTAAGCATTAATGGACCACCCAATGTCCTCCCACAGGTGATCACTA[A/C]TTATAGAGGCTTTATCTAGATTGAACTCATCTGCAAGAGTTGAACTTTATTTCTGCATACACAAAGCAAACTAGAACAARCCAAACATGAACAACAAGCA
Ro06-638671	Ro06	638671	A	G	CCTCCCACAGGTGATCACTAMTTATAGAGGCTTTATCTAGATTGAACTCATCTGCAAGAGTTGAACTTTATTTCTGCATACACAAAGCAAACTAGAACAA[A/G]CCAAACATGAACAACAAGCATGTATTACAACAAAGAAAAAGCACCACACAAGATACATATTTTAATGTTTCATTGGCATAGACCTCATTTTTTTTTATCA
Ro06-650974	Ro06	650974	G	A	AACATAATGTCTGTAATATAACAGGTTAAGCTGCAGCATACCTGGTCCTTAATACCAAGCATGTACACTCACGGTCCTTAATATCTATGAGTATAATAGT[G/A]CAYTATCTGAAGGGACTAGGGCCCACARCTAACTCCGAACGTCCATAGATCGTTCATACCAGTAAGTCACTTAAGCACGAGGACTTTCAAACATAACTAG
Ro06-650977	Ro06	650977	C	T	ATAATGTCTGTAATATAACAGGTTAAGCTGCAGCATACCTGGTCCTTAATACCAAGCATGTACACTCACGGTCCTTAATATCTATGAGTATAATAGTRCA[C/T]TATCTGAAGGGACTAGGGCCCACARCTAACTCCGAACGTCCATAGATCGTTCATACCAGTAAGTCACTTAAGCACGAGGACTTTCAAACATAACTAGACC
Ro06-651002	Ro06	651002	G	A	AGCTGCAGCATACCTGGTCCTTAATACCAAGCATGTACACTCACGGTCCTTAATATCTATGAGTATAATAGTRCAYTATCTGAAGGGACTAGGGCCCACA[G/A]CTAACTCCGAACGTCCATAGATCGTTCATACCAGTAAGTCACTTAAGCACGAGGACTTTCAAACATAACTAGACCCACAAAATACAGTCTTTATTAAAGA
Ro06-651825	Ro06	651825	C	T	GTAATCCAATAGAATAGTCCAAATAGACATGTCCAGAATGTCTAAGTTCAGAATCCAAGGTTTACCAAACAGTCCAGAAATAGTTATACTATGTTTTAAC[C/T]ATTTGTACTTAAATTATTTCGTTACTGTAAATCTRKAAATTAATTGTGATATTCTCCAGATCCTAAKTTCAGGTCCTAAGCTTTGTTTTTATATAAAGAT
Ro06-651860	Ro06	651860	G	A	GAATGTCTAAGTTCAGAATCCAAGGTTTACCAAACAGTCCAGAAATAGTTATACTATGTTTTAACYATTTGTACTTAAATTATTTCGTTACTGTAAATCT[G/A]KAAATTAATTGTGATATTCTCCAGATCCTAAKTTCAGGTCCTAAGCTTTGTTTTTATATAAAGATCATAAACTTTGGCTAAGTAATGAGTGAGATATGAT
Ro06-651861	Ro06	651861	T	G	AATGTCTAAGTTCAGAATCCAAGGTTTACCAAACAGTCCAGAAATAGTTATACTATGTTTTAACYATTTGTACTTAAATTATTTCGTTACTGTAAATCTR[T/G]AAATTAATTGTGATATTCTCCAGATCCTAAKTTCAGGTCCTAAGCTTTGTTTTTATATAAAGATCATAAACTTTGGCTAAGTAATGAGTGAGATATGATC
Ro06-651892	Ro06	651892	G	T	AACAGTCCAGAAATAGTTATACTATGTTTTAACYATTTGTACTTAAATTATTTCGTTACTGTAAATCTRKAAATTAATTGTGATATTCTCCAGATCCTAA[G/T]TTCAGGTCCTAAGCTTTGTTTTTATATAAAGATCATAAACTTTGGCTAAGTAATGAGTGAGATATGATCATTTGAAATTATGAACAATATATACGACTTC
Ro06-669733	Ro06	669733	G	A	AGAGAGAATCTTGTGCCCGTATGTGTAAACTCTTGTCTTTTATACACTTAAAATCACACCTATATCATTATTTCAGTAGTTACTTTGAACACAAGTATAT[G/A]TTCCTTTCTATGTATTTTAAACCATTACTATTGTTCAAGGACAGAATAATCAGTAATTAACAAACATGTAAACTTTGGTATTAAAAGAACTCAATTACAA
Ro06-699918	Ro06	699918	T	G	ATCTCAGTGGAAACGTGTTTGGTATGGAAATGTCAGAGAGTGATCGATCTTACTCAATATCAGTTTTTTTCAGCCTTCCAGTCTCAGCTAGGGCCCTCAC[T/G]ACAACTCATATCATATACAAAACAATACAATATCATGTGAAACTATTTGTCAATTTGATAACTGTATGTAACTCAACCCTAAGAGGTCTAAGCCAAAGCT
Ro06-726872	Ro06	726872	C	T	TCCTCATCGTAACTGTGCTTTCCCTTAATATCTTGGATTATTTTTTAGCAAAACCATTTAATTCTCGAAGCTATATCGATCAAGCTACGATAAAATGTCT[C/T]GTTATGCATGCATCAACATCGGATAGATCTGCACATGGCACATACTTGGACAATGTTGGTCCCCCTTGGTTCCATGGATTAGTGAGAAAGTGAAATTTGT
Ro06-728583	Ro06	728583	T	G	TATGCTTAGTTGTTATTAGTTGTCACGCATGTTAAGTTTGGTATAAATTTTCATAATCCTTTTGTGTTCTGCAATCTGCATATACTAAATTGGCTTAATG[T/G]AGACGATCACTTTCTGTTTGTATATTTTGTTTTCTTCTAATTTGAAAATTTAGTATTTATTGACACCATTAATTTTATGGAGACGGTTGCAATCTATGAC
Ro06-735775	Ro06	735775	C	T	TTTTGACATGTTTTTGTTTCCTGGTTTCCTTTCTCCTTGCGCTTTTGCAGATAGATGCTGCCATAAACTCTGGAAACTCTGGTGGGCCTGCCTTCAACGA[C/T]AAGGGAACCTGTGTGGGCATTGCTTTTCAGTCCCTTAAACATGAAGATGCGGAAAATATAGGCTACGTCATTCCAACACCCGTTATTAAGCACTTCATTA
Ro06-745214	Ro06	745214	A	G	TGGATCCACTGAGCTTCTGGGAATGCAGGTTATTTTCTTCTGCATAATGCCTTCTCTATTCCTATCATGAAGTTATAAGTACCTGACTTTGAGTCCTCAA[A/G]TGTTTTGGTGCATGTTCTTCATCCTTCGTGTTTTGTAGATTGATGCTGCTATAAACTCTGGAAACTCCGGCGGGCCTGCCTTTAGTGATAAAGGGAAATG
Ro06-770531	Ro06	770531	A	C	TGAAAACAAAAACAAAATACAGGAAATTCAATTAGGAGAATTAGCACATTATAGCTCCTCGTGATTATCTTATGCGTACATGAAGGACATGTTACAATTA[A/C]GCTGTGTTATTTARTTATTATACATCTTCTCCTGAGGTTYTGCATTGCAAGAATGGGGTCTTTTGGGTGCTTTGGACATCATTCTCCATAAGAGTAGTGC
Ro06-770545	Ro06	770545	G	A	AAATACAGGAAATTCAATTAGGAGAATTAGCACATTATAGCTCCTCGTGATTATCTTATGCGTACATGAAGGACATGTTACAATTAMGCTGTGTTATTTA[G/A]TTATTATACATCTTCTCCTGAGGTTYTGCATTGCAAGAATGGGGTCTTTTGGGTGCTTTGGACATCATTCTCCATAAGAGTAGTGCTGTTTTCTTTTATT
Ro06-770571	Ro06	770571	C	T	TTAGCACATTATAGCTCCTCGTGATTATCTTATGCGTACATGAAGGACATGTTACAATTAMGCTGTGTTATTTARTTATTATACATCTTCTCCTGAGGTT[C/T]TGCATTGCAAGAATGGGGTCTTTTGGGTGCTTTGGACATCATTCTCCATAAGAGTAGTGCTGTTTTCTTTTATTTGTGCCCACATCATAGCATAGAACCC
Ro06-794918	Ro06	794918	G	A	TGCTCGGTCTAGGCTAGCCACTAGATAGTTTCATTGGCTAAAAATGCATGCTTGACATAAAAAGATAACTAGGTATTTTGCTGAGCACTAAGTGCCATTT[G/A]AAGTAGTGCTTTAAGTTAATTAGTAATAGACCAAATCATGACTCTGAGCACAAATTTGGTAGTGAACCAATAATACCAAAACTCTGCTGCTAGTCAAGCA
Ro06-814763	Ro06	814763	T	C	TTTTAGACAGCCACGACTTGGTCTTTTGCTTGGTACCGAAGTCAGGATTATGTATGCCTGATAGGAGGTTCCAATCACAGCTCTAAATCAACTTGAGAAG[T/C]CTAACTATGGCTATTAGCCAATTAAAGGATAAGATATCTTCTCTAGATCACTTTTTTTGTTTTTTTATTTAGTCTTAAGCAAAGAAATTATTTGTTTTCT
Ro06-820717	Ro06	820717	A	T	TATTTTCTTTTCTTCTTGTTTCACTTTGAGATCTGGGAATCTAATTTGGGATATCTGAGATCAAGTTGGCTCCCATTACCTTCACACATCTATCAATTCT[A/T]GCTTTCACTCAATTATCACATGCTCAAACAATTTCTATCAATTTCCCTTCTAATTGCAGTACGTGCAACAACGTACATATGCTTTTGGAAATAGTATCTT
Ro06-837464	Ro06	837464	G	C	CCTATATCTATCAAGGCCAGGTACGTGTTGCTATTGCTATTGTTGTTGCTTTAGATTGATAACCTAAACCACCCACATCCTAACCACATACTTCATCATC[G/C]ACACTTTTTATCGATCAAGTACTATCGGAAAACAAGAAAAATAGCATGCATACCACTTACAGTCAACGTCAAACCGCCCTTCAACTACTGGACTCTGGAA
Ro06-856822	Ro06	856822	A	T	GTGGAGTAAATTTGCAAAAGATTAAGAAGAAGTGATAGTAAAAATAGGAGAAGACTAGGATAGGAAAGAAGTGGCGGTGAGAGTAGGAATTCGACTCTCT[A/T]AATTTTTTACTGCCCTAAGAATTGGAGCTGCATGCCTTAATTATACATGGCACGACGAATTCATATAACTCATTCTTTAGCATCATCGTCAGCTCAGATG
Ro06-885725	Ro06	885725	T	C	GAGGCCATGGCGCCGCCGGCCCTGTGAATCCCACAGGAGCCAACGCCGTGCCCCTTCATAGGGTTGCACCGCATGCGAAAGCTGCCTCTCAATCAAAGGA[T/C]TCTGGAAATCCCCCTACATGTTTTAGGTGTGGGCAAAACGGACACTGGGCAAAGACTTGTAGGGCACCCGTGAGTGTTGCCAATGCATACAAGCTATATC
Ro06-887486	Ro06	887486	C	T	CATGCAGTACTGCACGCAGCTATGCTTATTCGTCTGAGGCCCACTGCCACCCAAACATTCTCTGCGCAACAGCTAGTGACTGGGTACGAGCCAAGCATCT[C/T]GCACTTACGCATTTTTGGGTGTGCTGTTTATGTGYCTATTACGCCGCCACAGCGTACAAAGATGGGTCCTCAGAGACGAATGAGTATTTATGTTGGGTAT
Ro06-887521	Ro06	887521	C	T	GAGGCCCACTGCCACCCAAACATTCTCTGCGCAACAGCTAGTGACTGGGTACGAGCCAAGCATCTYGCACTTACGCATTTTTGGGTGTGCTGTTTATGTG[C/T]CTATTACGCCGCCACAGCGTACAAAGATGGGTCCTCAGAGACGAATGAGTATTTATGTTGGGTATGAGTCCCCATCCATAATCCGCTATGTAGAACCCTT
Ro06-889848	Ro06	889848	G	A	CTACTAAGCAGACTCTTGTCGCTACTTCTTCCAACCATGCTGAGATTATAGCACTTCATGAAGCTGTTCGTGAATGTATTTGGTTGAGGTCCATAATTGG[G/A]CACATAAGAAGTAYGTGTGGTTTAAGGTCTACCACAGATGAACCTACATGTATTTATGAGGATAATGCTGCTTGCATTGAGCAAATGAAGCAAGGTTTCA
Ro06-889862	Ro06	889862	C	T	CTTGTCGCTACTTCTTCCAACCATGCTGAGATTATAGCACTTCATGAAGCTGTTCGTGAATGTATTTGGTTGAGGTCCATAATTGGRCACATAAGAAGTA[C/T]GTGTGGTTTAAGGTCTACCACAGATGAACCTACATGTATTTATGAGGATAATGCTGCTTGCATTGAGCAAATGAAGCAAGGTTTCATCAAGGGCGACAAT
Ro06-940041	Ro06	940041	G	A	CGGCTGTCAGAAGAAGCTGCAAATTCTTGGCCTTTTTAATCCTCTCCGCGGTGACATAAGCAGGGTGGAAAGGCGTTGTGATCAGAACATGCATATCCTC[G/A]ATGTGTTTCTCAAGCTCTGTATAAACAACATTACAAAAAATAAACTAAAACCCTCATCCTCAGCAATTGGGAACCATAATTCGTTTTAATTACCAAGTTT
Ro06-946988	Ro06	946988	T	A	ATATACACCAACTAGATGCTTGGCAAATTGAACATTAATCTAATGGTCTTCAATATTCAATAATATGTGGAGATTACTTCTATCATGCTCTTTATAGATT[T/A]GTTACTTCCCAGAGATTMATATTTTAATTTGTTGTGTGGTCGATACAGGCAGAGAATGGTGGACTGATAGACAAACCTGGCAAATCTAGAGATTTTTATC
Ro06-947006	Ro06	947006	C	A	CTTGGCAAATTGAACATTAATCTAATGGTCTTCAATATTCAATAATATGTGGAGATTACTTCTATCATGCTCTTTATAGATTWGTTACTTCCCAGAGATT[C/A]ATATTTTAATTTGTTGTGTGGTCGATACAGGCAGAGAATGGTGGACTGATAGACAAACCTGGCAAATCTAGAGATTTTTATCACACATGTTATTGCCTAA
Ro06-947144	Ro06	947144	G	T	ATGGTGGACTGATAGACAAACCTGGCAAATCTAGAGATTTTTATCACACATGTTATTGCCTAAGTGGTCTCTCTGTATGTCAACATATCTCGTCAGATGC[G/T]GACTCTCCAGTTTTGCCTAGAGCAGTTTTGGGTCCCTATTCCAATCTGTTGGAACCAATTCATCCCCTCTTCAACGTTGTCTTAGATCAGTACCATGAAG
Ro06-953895	Ro06	953895	C	A	GCCTCTATTGACCCAAAAAAAAATTACTAATTAATGCATCTCCAATGGTGAGTGCCAAACACAAGTATCCAAATGAACATTATTCATATAAGAAAACCAC[C/A]ATCTTCAATGRTTGGGTGCCAAACCACCATCTTCCTCTCTCCTCCTCATTCCACATGCATTTGGATTCACCGAAAATAAAAATTACTAGTTTTGATCTCA
Ro06-953906	Ro06	953906	G	A	CCCAAAAAAAAATTACTAATTAATGCATCTCCAATGGTGAGTGCCAAACACAAGTATCCAAATGAACATTATTCATATAAGAAAACCACMATCTTCAATG[G/A]TTGGGTGCCAAACCACCATCTTCCTCTCTCCTCCTCATTCCACATGCATTTGGATTCACCGAAAATAAAAATTACTAGTTTTGATCTCAGTTTGGCACTT
Ro06-985003	Ro06	985003	A	C	TTGTATAGTTTCTGAAACATAGCACATACATTTGAATTAGTACACTCATTTATGCCAATATTTTAGTTATTTCCAAGTAATGAAGTGTTGTTGCATGTGT[A/C]TACGTAGTTACATACATTGATAGCTTGGTCTAACTGAGTGAGAATAACAGGAATGGAAGCTCTAACTTGCTCTATCGTCCCGTGTTGAAAGCCATAGGCA
Ro06-985550	Ro06	985550	T	C	CCAGTACAAGATTGAATCATAACAAGCTGTATAGGTTTGGGAGGATCGAATTGATTTGCATCATGAATGGTGGTGCATGTATTGGAAATCTTACCTTGTT[T/C]GGCTGATAGGATTGCATTGAAACCACAAAAATAACAGAAGATAAAAAGGGTTGATTCAATGATGCATAAAAGGRTACAAAACCTRATTCCAGATCTGAAT
Ro06-985624	Ro06	985624	G	A	GCATGTATTGGAAATCTTACCTTGTTYGGCTGATAGGATTGCATTGAAACCACAAAAATAACAGAAGATAAAAAGGGTTGATTCAATGATGCATAAAAGG[G/A]TACAAAACCTRATTCCAGATCTGAATTGGGAGATCAAATTTTCATATTATCTATTGGTTTTTCTACTGCAATTTTTATGGAACTTAAGTTTTGTGGTAAA
Ro06-985635	Ro06	985635	A	G	AAATCTTACCTTGTTYGGCTGATAGGATTGCATTGAAACCACAAAAATAACAGAAGATAAAAAGGGTTGATTCAATGATGCATAAAAGGRTACAAAACCT[A/G]ATTCCAGATCTGAATTGGGAGATCAAATTTTCATATTATCTATTGGTTTTTCTACTGCAATTTTTATGGAACTTAAGTTTTGTGGTAAATTTTATTGAAC
Ro06-993299	Ro06	993299	A	T	CAAGAACTTTGACACCCCACGCGACCTGGATGATTGTGCAATAAAGCATAAGGGAGAGGAAAAATTGTCTACATAGTCATATTTTGCAATAAAAGAGACA[A/T]TCTCAGTACTATCACTAAACACGTCACTACAGATGGAATTATGACAGAATGCATACATGTGGCATCGTATGATCAATATGCGTGCATTAAAAACTTGTAT
Ro06-1002165	Ro06	1002165	C	A	TCAGGCTTTGTGTGGGATAAAGCCGGTAACATTGTCACCAATTACCACGTCATTCGCGGCGCTTCTGATCTCAGGTTGGTTGGTTTCGGATTCTTCTTCC[C/A]TTGAAATAGTGTTCTGTTRCTTCAGAATCCTGCAATCTAATGTTTTATTAGCTAAGGATGAAATGTATGTWTTGGTAAGTGGTAAACCAAATGCGCTGAA
Ro06-1002184	Ro06	1002184	A	G	AAGCCGGTAACATTGTCACCAATTACCACGTCATTCGCGGCGCTTCTGATCTCAGGTTGGTTGGTTTCGGATTCTTCTTCCMTTGAAATAGTGTTCTGTT[A/G]CTTCAGAATCCTGCAATCTAATGTTTTATTAGCTAAGGATGAAATGTATGTWTTGGTAAGTGGTAAACCAAATGCGCTGAACATGTATGAGTCATCTGTA
Ro06-1002236	Ro06	1002236	T	A	CAGGTTGGTTGGTTTCGGATTCTTCTTCCMTTGAAATAGTGTTCTGTTRCTTCAGAATCCTGCAATCTAATGTTTTATTAGCTAAGGATGAAATGTATGT[T/A]TTGGTAAGTGGTAAACCAAATGCGCTGAACATGTATGAGTCATCTGTATGCTTGGCTTTCAGTTTCGATGAGTTCATTCCAGACTATAGCCTACAGGTTA
Ro06-1002409	Ro06	1002409	T	G	TTCATTCCAGACTATAGCCTACAGGTTAGATAGGATTGTAAATTGTACAAATGTAGTTCATTTATACTTCGGCATACACCTCATTTCAGTATAGTTATAG[T/G]GACTCAGAAGGATTGACATCAGAACTTCTTAGATCCTTTGAGTTCATTTTCAGCATTGGTCATAAATTCCGTACATGGTTACTTTGTTATTGCTTTTGCC
Ro06-1005140	Ro06	1005140	C	T	TAGTTTGATGACAAGGGTTCTCTTGTACATAATTTAACTATGATTTAGAACTCTAAAGCTGTATTTCTATGTGCACAAAATCATGTTGGCAATCCTTTTG[C/T]CATTGACGAAGAACGTGAAGTGCATGTTATGAGGTCGGAATKATGGGATTGGATGGTTAATTGGCCTTGTCTAGCTAMCCWCATTGGAATAGAAATCAAG
Ro06-1005182	Ro06	1005182	G	T	ATTTAGAACTCTAAAGCTGTATTTCTATGTGCACAAAATCATGTTGGCAATCCTTTTGYCATTGACGAAGAACGTGAAGTGCATGTTATGAGGTCGGAAT[G/T]ATGGGATTGGATGGTTAATTGGCCTTGTCTAGCTAMCCWCATTGGAATAGAAATCAAGATACTGTTGAAACTTTATCTTACTCTTTATAYGAGATGGCCG
Ro06-1005218	Ro06	1005218	A	C	AATCATGTTGGCAATCCTTTTGYCATTGACGAAGAACGTGAAGTGCATGTTATGAGGTCGGAATKATGGGATTGGATGGTTAATTGGCCTTGTCTAGCTA[A/C]CCWCATTGGAATAGAAATCAAGATACTGTTGAAACTTTATCTTACTCTTTATAYGAGATGGCCGGCCTAGTATGTTAAGTTACTAGAACGATCGATCAAC
Ro06-1005221	Ro06	1005221	A	T	CATGTTGGCAATCCTTTTGYCATTGACGAAGAACGTGAAGTGCATGTTATGAGGTCGGAATKATGGGATTGGATGGTTAATTGGCCTTGTCTAGCTAMCC[A/T]CATTGGAATAGAAATCAAGATACTGTTGAAACTTTATCTTACTCTTTATAYGAGATGGCCGGCCTAGTATGTTAAGTTACTAGAACGATCGATCAACCTA
Ro06-1005272	Ro06	1005272	C	T	AGGTCGGAATKATGGGATTGGATGGTTAATTGGCCTTGTCTAGCTAMCCWCATTGGAATAGAAATCAAGATACTGTTGAAACTTTATCTTACTCTTTATA[C/T]GAGATGGCCGGCCTAGTATGTTAAGTTACTAGAACGATCGATCAACCTAGTTATTATGTTAACAAGATCAAAAGTGTGAAGGCCATGGGTTGGCTGGGTC
Ro06-1013272	Ro06	1013272	T	G	TTAGCAAATTTCCAATGGAAACATTCACCGCCTCCTACAACATCACATTCACACTTCCAATTTAATATTGAATCCATATTTACAAGAAATTAAAGAACTT[T/G]TATTTGTTTGTGTTAAATAATGCGCTTTTAATTGTTTGAAAATGTACGTTTTTAGCATTTTTAGAAACAATGTGAAACAAATCTTTAGTAGAGCAAAATT
Ro06-1064843	Ro06	1064843	C	T	GGTTCTTGTAACGTTTGTAGTTGGAACCATTGCGATAAACCGAGTCTCTGAATATGGATGTAAAATCAACAACAATCTCGAAGGACGATTTCCTTTTGAC[C/T]GGATGAAATGCATCAACAGCTGCAGAGCGRACTCCYGATAGYACTTCATTAGCCGCGACATTAGCTTTCATTGGATCAATGCGCTTCTTCTCACCTTCTG
Ro06-1064873	Ro06	1064873	G	A	TGCGATAAACCGAGTCTCTGAATATGGATGTAAAATCAACAACAATCTCGAAGGACGATTTCCTTTTGACYGGATGAAATGCATCAACAGCTGCAGAGCG[G/A]ACTCCYGATAGYACTTCATTAGCCGCGACATTAGCTTTCATTGGATCAATGCGCTTCTTCTCACCTTCTGCTGGTGTTTTGGGACCTGAGCCGCGAGATG
Ro06-1064879	Ro06	1064879	T	C	AAACCGAGTCTCTGAATATGGATGTAAAATCAACAACAATCTCGAAGGACGATTTCCTTTTGACYGGATGAAATGCATCAACAGCTGCAGAGCGRACTCC[T/C]GATAGYACTTCATTAGCCGCGACATTAGCTTTCATTGGATCAATGCGCTTCTTCTCACCTTCTGCTGGTGTTTTGGGACCTGAGCCGCGAGATGTTGCAT
Ro06-1064885	Ro06	1064885	T	C	AGTCTCTGAATATGGATGTAAAATCAACAACAATCTCGAAGGACGATTTCCTTTTGACYGGATGAAATGCATCAACAGCTGCAGAGCGRACTCCYGATAG[T/C]ACTTCATTAGCCGCGACATTAGCTTTCATTGGATCAATGCGCTTCTTCTCACCTTCTGCTGGTGTTTTGGGACCTGAGCCGCGAGATGTTGCATGCATTG
Ro06-1076649	Ro06	1076649	C	T	ATATATAGTACGTCTAGAAATTCAAAACTCATTATAGGTTGGTTATCAAGGTGTGTTTGAGTTATTATATAGCATATTTTAGGCATCTAGACCCCTTCCC[C/T]GGACACCATATATCTTTTAGGCATCTATATATACTTAATAGTCCAGGATTGACTSCCTTATTAAAACCYTAACCTAATTAAAACCCTAGCTAGCCAGAGG
Ro06-1076704	Ro06	1076704	C	G	TTTGAGTTATTATATAGCATATTTTAGGCATCTAGACCCCTTCCCYGGACACCATATATCTTTTAGGCATCTATATATACTTAATAGTCCAGGATTGACT[C/G]CCTTATTAAAACCYTAACCTAATTAAAACCCTAGCTAGCCAGAGGAGGGAGATATTTTTGTTATGATCGATAAAGTTGGCCATGCATGCATATATATCAT
Ro06-1076718	Ro06	1076718	T	C	TAGCATATTTTAGGCATCTAGACCCCTTCCCYGGACACCATATATCTTTTAGGCATCTATATATACTTAATAGTCCAGGATTGACTSCCTTATTAAAACC[T/C]TAACCTAATTAAAACCCTAGCTAGCCAGAGGAGGGAGATATTTTTGTTATGATCGATAAAGTTGGCCATGCATGCATATATATCATGGCCGACCCGACAT
Ro06-1089517	Ro06	1089517	A	C	TAAAATTTTATCATATCTGCCCTCCAATCTCACTGCCTTTTAGAAGATCTTAAAAAAAAAAATATTTGTATTTATCGAAGCAAGTGTGTATTTATCCACT[A/C]ACAAAAAAATGGTTACACAATCAAGAACAAAATTTAAGCCTTTATCTGTGYACRCACAGACACACATGCAGAGAGATACAGAGGAATAGAGAGAGTTACC
Ro06-1089568	Ro06	1089568	T	C	AAAAAAAAAAATATTTGTATTTATCGAAGCAAGTGTGTATTTATCCACTMACAAAAAAATGGTTACACAATCAAGAACAAAATTTAAGCCTTTATCTGTG[T/C]ACRCACAGACACACATGCAGAGAGATACAGAGGAATAGAGAGAGTTACCTTGTCCTGACCCCCCACATCCCAGACAGTGAAGCTGATGTTCTTGTATTCC
Ro06-1089571	Ro06	1089571	G	A	AAAAAAAATATTTGTATTTATCGAAGCAAGTGTGTATTTATCCACTMACAAAAAAATGGTTACACAATCAAGAACAAAATTTAAGCCTTTATCTGTGYAC[G/A]CACAGACACACATGCAGAGAGATACAGAGGAATAGAGAGAGTTACCTTGTCCTGACCCCCCACATCCCAGACAGTGAAGCTGATGTTCTTGTATTCCACT
Ro06-1099497	Ro06	1099497	G	A	CCAAACATAGCCCTTATGACATCTCATGGATGGGCCCAGCAAATGCACCCACATACATTACATGTGATGATGTGAAAAGCTAAAATTTGGCATCCTACCG[G/A]TTGGAGACGGTKAAATTATAGYCGATACTATTTGAATGAATAGTAAATTGTGGGGGGCTAAAATTTTAGCTCAGGGTCAAATATAGCCCCTCCCAATTGG
Ro06-1099509	Ro06	1099509	T	G	CTTATGACATCTCATGGATGGGCCCAGCAAATGCACCCACATACATTACATGTGATGATGTGAAAAGCTAAAATTTGGCATCCTACCGRTTGGAGACGGT[T/G]AAATTATAGYCGATACTATTTGAATGAATAGTAAATTGTGGGGGGCTAAAATTTTAGCTCAGGGTCAAATATAGCCCCTCCCAATTGGAGATGGCCTAAT
Ro06-1099519	Ro06	1099519	T	C	CTCATGGATGGGCCCAGCAAATGCACCCACATACATTACATGTGATGATGTGAAAAGCTAAAATTTGGCATCCTACCGRTTGGAGACGGTKAAATTATAG[T/C]CGATACTATTTGAATGAATAGTAAATTGTGGGGGGCTAAAATTTTAGCTCAGGGTCAAATATAGCCCCTCCCAATTGGAGATGGCCTAATGTTTTTCATA
Ro06-1112227	Ro06	1112227	A	G	TATGCTTCTAATTTTAGATGAATGAAGATTTGGATGCCTTTGATATTTAACTGTTTACCTCATTTGATCATTAGAATCTCTGCGTGGTCTCCTCTGCTTC[A/G]TTACAAAACCTAATTTGTGCTACCTTTTTGCCTAGTTTCTACTCGCAGCTCTCTTCTMTTCAATTCRCAGWYAATGTCTTYCTGTTTTCTCATAGGAGCC
Ro06-1112285	Ro06	1112285	C	A	CTCATTTGATCATTAGAATCTCTGCGTGGTCTCCTCTGCTTCRTTACAAAACCTAATTTGTGCTACCTTTTTGCCTAGTTTCTACTCGCAGCTCTCTTCT[C/A]TTCAATTCRCAGWYAATGTCTTYCTGTTTTCTCATAGGAGCCATTGTAAAGAGAAGAGCCAGAAAAATGTTAAAACCTAAATTGAAGCACAAAACATGTA
Ro06-1112294	Ro06	1112294	A	G	TCATTAGAATCTCTGCGTGGTCTCCTCTGCTTCRTTACAAAACCTAATTTGTGCTACCTTTTTGCCTAGTTTCTACTCGCAGCTCTCTTCTMTTCAATTC[A/G]CAGWYAATGTCTTYCTGTTTTCTCATAGGAGCCATTGTAAAGAGAAGAGCCAGAAAAATGTTAAAACCTAAATTGAAGCACAAAACATGTATATCTCCTA
Ro06-1112298	Ro06	1112298	T	A	TAGAATCTCTGCGTGGTCTCCTCTGCTTCRTTACAAAACCTAATTTGTGCTACCTTTTTGCCTAGTTTCTACTCGCAGCTCTCTTCTMTTCAATTCRCAG[T/A]YAATGTCTTYCTGTTTTCTCATAGGAGCCATTGTAAAGAGAAGAGCCAGAAAAATGTTAAAACCTAAATTGAAGCACAAAACATGTATATCTCCTAAAAG
Ro06-1112299	Ro06	1112299	C	T	AGAATCTCTGCGTGGTCTCCTCTGCTTCRTTACAAAACCTAATTTGTGCTACCTTTTTGCCTAGTTTCTACTCGCAGCTCTCTTCTMTTCAATTCRCAGW[C/T]AATGTCTTYCTGTTTTCTCATAGGAGCCATTGTAAAGAGAAGAGCCAGAAAAATGTTAAAACCTAAATTGAAGCACAAAACATGTATATCTCCTAAAAGA
Ro06-1112308	Ro06	1112308	T	C	GCGTGGTCTCCTCTGCTTCRTTACAAAACCTAATTTGTGCTACCTTTTTGCCTAGTTTCTACTCGCAGCTCTCTTCTMTTCAATTCRCAGWYAATGTCTT[T/C]CTGTTTTCTCATAGGAGCCATTGTAAAGAGAAGAGCCAGAAAAATGTTAAAACCTAAATTGAAGCACAAAACATGTATATCTCCTAAAAGACTGATTAAT
Ro06-1123078	Ro06	1123078	G	C	CAATGTTTTCCCTTATGTCCCCGCGGCTGCTGTTTCACTCCAAGACAGCCAGAAGGCCGTCATGCATGGCGGGTGGGGGGATTATGATGACGTTTCTCCT[G/C]GTYGTCAYCAAGACCCCCACCACCACCAGATTCCAGCTGTGCAGCTTCCGGGGGCTGCACAGCCGGCCAGCTGTATCCAGCTTCCGCCCCTCATCAATTT
Ro06-1123081	Ro06	1123081	T	C	TGTTTTCCCTTATGTCCCCGCGGCTGCTGTTTCACTCCAAGACAGCCAGAAGGCCGTCATGCATGGCGGGTGGGGGGATTATGATGACGTTTCTCCTSGT[T/C]GTCAYCAAGACCCCCACCACCACCAGATTCCAGCTGTGCAGCTTCCGGGGGCTGCACAGCCGGCCAGCTGTATCCAGCTTCCGCCCCTCATCAATTTCCA
Ro06-1123086	Ro06	1123086	T	C	TCCCTTATGTCCCCGCGGCTGCTGTTTCACTCCAAGACAGCCAGAAGGCCGTCATGCATGGCGGGTGGGGGGATTATGATGACGTTTCTCCTSGTYGTCA[T/C]CAAGACCCCCACCACCACCAGATTCCAGCTGTGCAGCTTCCGGGGGCTGCACAGCCGGCCAGCTGTATCCAGCTTCCGCCCCTCATCAATTTCCAAGAGA
Ro06-1124884	Ro06	1124884	T	G	GAATACCATCAAGAACCACTGGAACGCCACCAAGCGCAAGCAATACTCCAAGAGGAAATTACTCAACACCAGCATCAATCTCAACAATGACTCCTCATCG[T/G]TGAACAACAACCCTGCCAATGAGAGCACTGTCTTGGCTAACTACATCAAGAGCGTGGTGAAATCTTCGGYTGCTGCTTCKGCCGAAAAGAACAAGGGTAA
Ro06-1124954	Ro06	1124954	C	T	AGCATCAATCTCAACAATGACTCCTCATCGKTGAACAACAACCCTGCCAATGAGAGCACTGTCTTGGCTAACTACATCAAGAGCGTGGTGAAATCTTCGG[C/T]TGCTGCTTCKGCCGAAAAGAACAAGGGTAAGGCTGCGGTGGTCTACGCAGAATCAAGCATGCAAGCTCAAGTGTATCATCCCCAGTTCGAGTCGACCCCC
Ro06-1124964	Ro06	1124964	T	G	TCAACAATGACTCCTCATCGKTGAACAACAACCCTGCCAATGAGAGCACTGTCTTGGCTAACTACATCAAGAGCGTGGTGAAATCTTCGGYTGCTGCTTC[T/G]GCCGAAAAGAACAAGGGTAAGGCTGCGGTGGTCTACGCAGAATCAAGCATGCAAGCTCAAGTGTATCATCCCCAGTTCGAGTCGACCCCCTTCGACGCGG
Ro06-1125198	Ro06	1125198	T	C	ACAATCCGGACAACTACAGCGTGGCGGCGACCGTGGGGAGCAGCAGCAGTAGCTCTTATCTCTCTTGTGACAGAAGCATGTATCCCGAGTTTTACGGGTA[T/C]GAGGACGGGGGCCGTACTGTTCCGATGAGTGAAGATGAGGCTCGTCTGTCGTTGGAGATCAACAGTCTGATGCAGGGGCAAGCTGAGGTGAAGAAGGAGA
Ro06-1130583	Ro06	1130583	C	T	ATGAAAATGGACACCATAAGCCAATAGAAGCTAGCTAACATCAAAATCATGTGTAAATAAGCAACAATAATGGGGAAAAAAAATGGAGATCCTCATATCT[C/T]ACCTAGCTGAGGCCGCCCTTTGCTCATGGAAATCRAATGTATAGACATGTCCCTTAGGAGCTACAGCCCTTGCAAGTGATGTTGTCAAAGACCCACTTCC
Ro06-1130618	Ro06	1130618	A	G	TAACATCAAAATCATGTGTAAATAAGCAACAATAATGGGGAAAAAAAATGGAGATCCTCATATCTYACCTAGCTGAGGCCGCCCTTTGCTCATGGAAATC[A/G]AATGTATAGACATGTCCCTTAGGAGCTACAGCCCTTGCAAGTGATGTTGTCAAAGACCCACTTCCAGTGCCCGACTCAAGAACCAAACATCCAGGAACTA
Ro06-1134519	Ro06	1134519	T	C	GATATAAGTTATAATCCATTTGTGCGAAGTATTTCCCATTAGGACATGCATGTTTAGCATAATGATGTAAATCTAATCCATTTCATTTTGTGGTACTGAA[T/C]TGCAGGTACTTATTGGTGGCATTGATGCATATTCCATGCTACGCTTTCTTTACACTAATTGTTAGGTCAAAACATTACCTATTGTCAAAATGGTTTCCTC
Ro06-1159603	Ro06	1159603	T	C	ACAACAACTAATGCCAGCGAACTCATCATAAAAGCAAAGACACAGACTTGAATCTAGAAAAATGCCACAAAATCCGATCCCATATCTATACATATAATCG[T/C]TACTGCATGCTCCTCTGCAATTTTAGCGATTTCCACAAATCTAAGGGATGCATGATGCATACCAAAACTTTGACATGGCTCTTCTTCTTCTTGTTCTTGC
Ro06-1162580	Ro06	1162580	T	A	CCCAATTTTGTTTTGAGAAGTAGAACACTCTCAACCTTACTATAATTCCAGTAGAAGTAAGAGGGAAAATTAACATCTAATTTCGACATGCAAAACTAGA[T/A]GGTKAAAACACTTGCTACAGAAAGCTAGCTCAAATTAATCCGGTAGAAGCCAAACTAATGAGGCAGAGAACATACATGCAAAACAGAGGAGCTWAATCAA
Ro06-1162584	Ro06	1162584	T	G	ATTTTGTTTTGAGAAGTAGAACACTCTCAACCTTACTATAATTCCAGTAGAAGTAAGAGGGAAAATTAACATCTAATTTCGACATGCAAAACTAGAWGGT[T/G]AAAACACTTGCTACAGAAAGCTAGCTCAAATTAATCCGGTAGAAGCCAAACTAATGAGGCAGAGAACATACATGCAAAACAGAGGAGCTWAATCAATACA
Ro06-1162674	Ro06	1162674	T	A	ACTAGAWGGTKAAAACACTTGCTACAGAAAGCTAGCTCAAATTAATCCGGTAGAAGCCAAACTAATGAGGCAGAGAACATACATGCAAAACAGAGGAGCT[T/A]AATCAATACAGCMCAGKCCTCTACCACTATCCATTAACAAACATAGAATTAATTAAGTACTAGACCTCTAAGCCTGATCTACTCATCTTCTTCGCCGACG
Ro06-1162687	Ro06	1162687	C	A	AACACTTGCTACAGAAAGCTAGCTCAAATTAATCCGGTAGAAGCCAAACTAATGAGGCAGAGAACATACATGCAAAACAGAGGAGCTWAATCAATACAGC[C/A]CAGKCCTCTACCACTATCCATTAACAAACATAGAATTAATTAAGTACTAGACCTCTAAGCCTGATCTACTCATCTTCTTCGCCGACGACGGTGGTGATTC
Ro06-1162691	Ro06	1162691	G	T	CTTGCTACAGAAAGCTAGCTCAAATTAATCCGGTAGAAGCCAAACTAATGAGGCAGAGAACATACATGCAAAACAGAGGAGCTWAATCAATACAGCMCAG[G/T]CCTCTACCACTATCCATTAACAAACATAGAATTAATTAAGTACTAGACCTCTAAGCCTGATCTACTCATCTTCTTCGCCGACGACGGTGGTGATTCTACC
Ro06-1166955	Ro06	1166955	G	A	TTTTCTTCTCTGGTTTGAATACGCTTTTTTCGCTTCCCTTTGTCACCAAGAATGTGAAAGCGAAGTCGACCATCTTTATCAGCGTTTATGTCATTTAGAA[G/A]CTTCTTCTCATTGCGTCTGAGCTGTATCCCTTCATATTCCAGAAKAGRGATAGATACATAAATTATTTCTTCATTAGTTTGTCAAAGAACAGTAAATAGM
Ro06-1167000	Ro06	1167000	G	T	CCAAGAATGTGAAAGCGAAGTCGACCATCTTTATCAGCGTTTATGTCATTTAGAARCTTCTTCTCATTGCGTCTGAGCTGTATCCCTTCATATTCCAGAA[G/T]AGRGATAGATACATAAATTATTTCTTCATTAGTTTGTCAAAGAACAGTAAATAGMAGCAAGTAGTTAAATAAACATTACATGCAATTTCCTCAGCACTAC
Ro06-1167003	Ro06	1167003	A	G	AGAATGTGAAAGCGAAGTCGACCATCTTTATCAGCGTTTATGTCATTTAGAARCTTCTTCTCATTGCGTCTGAGCTGTATCCCTTCATATTCCAGAAKAG[A/G]GATAGATACATAAATTATTTCTTCATTAGTTTGTCAAAGAACAGTAAATAGMAGCAAGTAGTTAAATAAACATTACATGCAATTTCCTCAGCACTACATA
Ro06-1167055	Ro06	1167055	C	A	RCTTCTTCTCATTGCGTCTGAGCTGTATCCCTTCATATTCCAGAAKAGRGATAGATACATAAATTATTTCTTCATTAGTTTGTCAAAGAACAGTAAATAG[C/A]AGCAAGTAGTTAAATAAACATTACATGCAATTTCCTCAGCACTACATATAACATGAAGAGCATCTTCCAAACTGCAGTTTACGGGTGTCTGAATAATGTA
Ro06-1168252	Ro06	1168252	T	G	CGACCTGCCCTCCCACACATCTGCATCATGATACACTAACATCATATTAAATTGCAGTTTGCTAAATTACCGAAATGTGCAGGACATGCATGTAGATACC[T/G]CAAGAACTTTTCTTGTTTAACTATTCCTGGCCACATTTTTTTTCAAATAGAACCTTGATGTACAAACGAGATAATATACTGGACAGAAGTAATACAAAAA
Ro06-1171754	Ro06	1171754	C	T	TGACACAACCATGTTTACATCTGAGTGGAAACAAGCAGGAAAGCATTCACTCTGCAGAGAATTGAAATACCTGCATGCATAGGAAAGGAAACATTTTACC[C/T]ACAACATTCTGCACCTTGTGGATAGCACAAAAATAATAACACCAGCYGTGCAGATAATGAAAGAACCATTACTGAGATCACACAGAAACTCGAAATCACT
Ro06-1171801	Ro06	1171801	C	T	CACTCTGCAGAGAATTGAAATACCTGCATGCATAGGAAAGGAAACATTTTACCYACAACATTCTGCACCTTGTGGATAGCACAAAAATAATAACACCAGC[C/T]GTGCAGATAATGAAAGAACCATTACTGAGATCACACAGAAACTCGAAATCACTGTGCACCTTCTATGTTAGGAATATGCAGCTCTGACCAAAAAAATTAC
Ro06-1172355	Ro06	1172355	G	C	CAAGAAGCGTGATAGATTATTGAGTGTCCAAATCCTATGAAATTTCATGCTATAATTCGCAGAAATGAAACACGAATAGTACGCATGTCAAGAACCATAT[G/C]TTGSTTAATAGAATCAATAAAATCCAAAAATTTCCCCAAAAAAATAACAAATGACATCTCTCTTGTGCGAACTAACCAGAGCTCTTGACTAATTAACCAA
Ro06-1172359	Ro06	1172359	C	G	AAGCGTGATAGATTATTGAGTGTCCAAATCCTATGAAATTTCATGCTATAATTCGCAGAAATGAAACACGAATAGTACGCATGTCAAGAACCATATSTTG[C/G]TTAATAGAATCAATAAAATCCAAAAATTTCCCCAAAAAAATAACAAATGACATCTCTCTTGTGCGAACTAACCAGAGCTCTTGACTAATTAACCAATTTA
Ro06-1183173	Ro06	1183173	A	G	GAGCGCCAACCCAAGTAAATGAACGTTTAGAAGTACAAGCAAAACGAGCACAATCATGAGCCAAAACATTGGCTTCACGGAAAACATGTAAAAAATGAGA[A/G]CTAGGAAGTTCTGAAAGTAATGAGACTATATCGTCATACACGCCCGCCGAACGACGTATGGGGAACGAGATCTCTAGTAGCTGAAACCAACATGGTGGAG
Ro06-1205455	Ro06	1205455	T	G	CAACATGAAATTAAAATTAGGTTTGTGCAGGTCCAACAGCTTAAAAGTGAAAAGTCACACACATGCTGTATGAAGCAAACTTGTTGGAGGAGAGTTTAAA[T/G]TTTTGCTCGACAAAGGAGAAGAAATAACTTTTATCATGTATTTGAATAACAATCTTGTGTCATTCTCCGTAGGTCACTAGAAATCACATTAACCTTGCTC
Ro06-1206316	Ro06	1206316	C	A	CTATTTGCAAAATAGGAGGGGCACCACCGCACCACTAGTACCTTTGCCACCCGTTTCTTCCTTTACCCGTGCAACAAAGTCCTCTGTCTTGTAATTGATA[C/A]AAACGTCAGCCCCAAGATCCTTACAAGCTGCTAACTTTTCCTCACTACCTGATGATCCCAAGATCAACATTCTTAAAATTTGTGAAAAACTGATTTTGTG
Ro06-1231893	Ro06	1231893	T	G	AATCTAATTTTGTCAAAGCAAAAATCCAAATTTTACAACACATCCTTATTCGGAGCCTTTATCTTATTTGATCTGAATTACAAATCTAAAGCTCTCATCT[T/G]GACCCTTGTGCCTTTGAATTTCAACGTACGTACAATTGCCCATCTTSAATTTTGACCCCCTGGCCTATGCAGATTGAAACCATTAATTTAGCTAGCTCCA
Ro06-1231940	Ro06	1231940	G	C	ATTCGGAGCCTTTATCTTATTTGATCTGAATTACAAATCTAAAGCTCTCATCTKGACCCTTGTGCCTTTGAATTTCAACGTACGTACAATTGCCCATCTT[G/C]AATTTTGACCCCCTGGCCTATGCAGATTGAAACCATTAATTTAGCTAGCTCCACTTCCTCTTGTATGCTTCAATTTTGTTCCTTTAATCCATAAAACCAT
Ro06-1255188	Ro06	1255188	T	C	GCTAGTACTTCTCAAAAATCTTTGCTTTCAGTTGTCTTAGATCACATTCGAAATTGCATAATTCAGCAACTAGTGCAGTTCTTAAACCCTGTTAGGTCAA[T/C]TCTCTAGATTGTTTTCTCCTGATATGTTGGTGTCTGGGTTGGGTTGATTTAAACATTTGGGAGATCTATACCCACTACTTGGGAGCTTTAAGATGCAGAG
Ro06-1256974	Ro06	1256974	G	T	ATAATATATAGGGTACGTGTTTACTGCTAACTGTGCTATGCTTCACTAACACAATAGCTTAAAACATATACATGCATGTATTGCTCTCATAGTTATAGCT[G/T]ATAGGAGTAGTAGTACCCCATGATTGSCTATCACTAATATATCACAGTACTCTATGTCCTCCATTATTGGGTGCTACTTAATTAGCAGTAGTCACGTATA
Ro06-1257001	Ro06	1257001	G	C	TAACTGTGCTATGCTTCACTAACACAATAGCTTAAAACATATACATGCATGTATTGCTCTCATAGTTATAGCTKATAGGAGTAGTAGTACCCCATGATTG[G/C]CTATCACTAATATATCACAGTACTCTATGTCCTCCATTATTGGGTGCTACTTAATTAGCAGTAGTCACGTATATATATGGTTAATGACATGGTCACCCTC
Ro06-1264637	Ro06	1264637	G	A	TTAATTAATAATCATTAAATATCATCAATTAATAATCATTAAATATCATTAATTAATAAGTTTTAAAGTTGAATAAGTAATAGTAATTAGATCTAGGATG[G/A]GTATGATAGACTTTTGYTAAAATGATTTGTTAATTAGATAATGATGTGTATATGATGTGGCATGCCACATACGATTGAAGCCTCCTCATCTTAGGTTTTA
Ro06-1264654	Ro06	1264654	C	T	AATATCATCAATTAATAATCATTAAATATCATTAATTAATAAGTTTTAAAGTTGAATAAGTAATAGTAATTAGATCTAGGATGRGTATGATAGACTTTTG[C/T]TAAAATGATTTGTTAATTAGATAATGATGTGTATATGATGTGGCATGCCACATACGATTGAAGCCTCCTCATCTTAGGTTTTAATGAGGCCAACAATCTT
Ro06-1265126	Ro06	1265126	C	A	CAAATCATTTTAAAATAAGAAATGACGCATGCTGCACACATATTCTGACCATCAAATTTAAAAACAAACTTTTATTTTTCTTATATGCATGCAATTATTT[C/A]AAGAGAAGACAGCCAAGTTCCTATCACCTTTGCTCATCCAAATAGGGGGCGGCGAGCCACCCCACTTATGCTTTCTATTGGTCGGTTTTGATGGAGATCG
Ro06-1271496	Ro06	1271496	C	T	AATACTGAAATTTCTCCTGAAGAGAAAGATCTAGTAACGATCTTAGCAAATGAAACGTCCTTGGACATTCAAGATCCTGCTGTACAAGCAGAGGAAACTT[C/T]CAACTCGAAAGAGAACTTGGAGAAGCAGATTTCAGAAGCACCAGATAAAGGTGACACATGCKTGAAGGAAGCCGGAGAAGAGAACAAGGAGCAGGTCAAA
Ro06-1271558	Ro06	1271558	G	T	GGACATTCAAGATCCTGCTGTACAAGCAGAGGAAACTTYCAACTCGAAAGAGAACTTGGAGAAGCAGATTTCAGAAGCACCAGATAAAGGTGACACATGC[G/T]TGAAGGAAGCCGGAGAAGAGAACAAGGAGCAGGTCAAAAACACTGATATTTCTCCTGAAGAGAAGGGTCACGAAACCATCATAATAGATGAAACGACCCA
Ro06-1271849	Ro06	1271849	G	T	AAACTTGACGGAAGCTGAAGCAGAAAACAAGGAGCATGTAGAAACTACTGAGAAAGGTCCTGAAGAGAAGGGTCTGGCAACCATCTTAACAGATGAAACT[G/T]CCGAGGACATYGAATATAATGATGCACAAGCAGCGGAAATCAACTCAAAAGAGGTCTTGGAGAAGCAGATTCCAACAGCTGTAGRTGAAGGTGAAACAGA
Ro06-1271860	Ro06	1271860	T	C	AAGCTGAAGCAGAAAACAAGGAGCATGTAGAAACTACTGAGAAAGGTCCTGAAGAGAAGGGTCTGGCAACCATCTTAACAGATGAAACTKCCGAGGACAT[T/C]GAATATAATGATGCACAAGCAGCGGAAATCAACTCAAAAGAGGTCTTGGAGAAGCAGATTCCAACAGCTGTAGRTGAAGGTGAAACAGACTTGACTGAAG
Ro06-1271934	Ro06	1271934	A	G	TTAACAGATGAAACTKCCGAGGACATYGAATATAATGATGCACAAGCAGCGGAAATCAACTCAAAAGAGGTCTTGGAGAAGCAGATTCCAACAGCTGTAG[A/G]TGAAGGTGAAACAGACTTGACTGAAGCTGAAGCAGATTACAAGGAGCATGTAGAGTATACTGATATTTCTCCTGAACAAAAGGGTGTAGAAACCATCTTA
Ro06-1274694	Ro06	1274694	A	T	TACTTGAAGAGGTATGCAATATGGGATATAGTGATCATGCATGTGTTGCACGCACATACAATTATAAGCAAATAGCCAAATACTAATTCATATGTGTTCT[A/T]TAGTTTCTTTCTTTTTGCAAGGCCTGAATKTTGAAAGGAGGTCTCTTTTTGGAATGTGTTMWAGCAGGTACTAGATGAACCAAAGATCACAGACAGAGAT
Ro06-1274724	Ro06	1274724	G	T	GTGATCATGCATGTGTTGCACGCACATACAATTATAAGCAAATAGCCAAATACTAATTCATATGTGTTCTWTAGTTTCTTTCTTTTTGCAAGGCCTGAAT[G/T]TTGAAAGGAGGTCTCTTTTTGGAATGTGTTMWAGCAGGTACTAGATGAACCAAAGATCACAGACAGAGATTTCAATGAAGAACAAATCACAGAGGGAAAT
Ro06-1274755	Ro06	1274755	C	A	TTATAAGCAAATAGCCAAATACTAATTCATATGTGTTCTWTAGTTTCTTTCTTTTTGCAAGGCCTGAATKTTGAAAGGAGGTCTCTTTTTGGAATGTGTT[C/A]WAGCAGGTACTAGATGAACCAAAGATCACAGACAGAGATTTCAATGAAGAACAAATCACAGAGGGAAATGTCGTAAATTTTGCAACTGAATCAATTGTGG
Ro06-1274756	Ro06	1274756	T	A	TATAAGCAAATAGCCAAATACTAATTCATATGTGTTCTWTAGTTTCTTTCTTTTTGCAAGGCCTGAATKTTGAAAGGAGGTCTCTTTTTGGAATGTGTTM[T/A]AGCAGGTACTAGATGAACCAAAGATCACAGACAGAGATTTCAATGAAGAACAAATCACAGAGGGAAATGTCGTAAATTTTGCAACTGAATCAATTGTGGA
Ro06-1278625	Ro06	1278625	A	T	AATATAGAAGAAGAGCACGCAAAGGAAGTGGAAGTTCCAACTGCTGATGACACAGGAGATTTATTCGCTCCAAGGTCAGCGGAAGAGACATGCTTACCAA[A/T]GGAAGAGCCCAGAGAGAGAGTTTCTGAATTGRCWCTTGAAAAGCTAGAAGCTGGTGAAAGCRAAGAAGAAATCAAGGAAACTTTTGAAACTGTCTCTAAA
Ro06-1278657	Ro06	1278657	A	G	AGTTCCAACTGCTGATGACACAGGAGATTTATTCGCTCCAAGGTCAGCGGAAGAGACATGCTTACCAAWGGAAGAGCCCAGAGAGAGAGTTTCTGAATTG[A/G]CWCTTGAAAAGCTAGAAGCTGGTGAAAGCRAAGAAGAAATCAAGGAAACTTTTGAAACTGTCTCTAAATTTGATTCTCAAAGCATYGGTGTASTTTCCGA
Ro06-1278659	Ro06	1278659	T	A	TTCCAACTGCTGATGACACAGGAGATTTATTCGCTCCAAGGTCAGCGGAAGAGACATGCTTACCAAWGGAAGAGCCCAGAGAGAGAGTTTCTGAATTGRC[T/A]CTTGAAAAGCTAGAAGCTGGTGAAAGCRAAGAAGAAATCAAGGAAACTTTTGAAACTGTCTCTAAATTTGATTCTCAAAGCATYGGTGTASTTTCCGAAG
Ro06-1278687	Ro06	1278687	A	G	ATTCGCTCCAAGGTCAGCGGAAGAGACATGCTTACCAAWGGAAGAGCCCAGAGAGAGAGTTTCTGAATTGRCWCTTGAAAAGCTAGAAGCTGGTGAAAGC[A/G]AAGAAGAAATCAAGGAAACTTTTGAAACTGTCTCTAAATTTGATTCTCAAAGCATYGGTGTASTTTCCGAAGATGAAATCATCACTGATCAAACACAGTG
Ro06-1278743	Ro06	1278743	T	C	GAGTTTCTGAATTGRCWCTTGAAAAGCTAGAAGCTGGTGAAAGCRAAGAAGAAATCAAGGAAACTTTTGAAACTGTCTCTAAATTTGATTCTCAAAGCAT[T/C]GGTGTASTTTCCGAAGATGAAATCATCACTGATCAAACACAGTGTGAGGGTATAACAGACGCGCCACTTCAAATACCATCTTACACCTTGCTTCCGGAGG
Ro06-1278750	Ro06	1278750	C	G	TGAATTGRCWCTTGAAAAGCTAGAAGCTGGTGAAAGCRAAGAAGAAATCAAGGAAACTTTTGAAACTGTCTCTAAATTTGATTCTCAAAGCATYGGTGTA[C/G]TTTCCGAAGATGAAATCATCACTGATCAAACACAGTGTGAGGGTATAACAGACGCGCCACTTCAAATACCATCTTACACCTTGCTTCCGGAGGAAAAGGA
Ro06-1279218	Ro06	1279218	C	G	TGAAGAGAACCCAAAAGAAGTAGAAGTGCCTGCTGATGAAGACAAACAAGATTTATACACTGCAACGCCAGCAAAAGAGACATGCTTGCAAGCAGACGAG[C/G]CCAAAGATTCTGAATTGGCTSTGCAAAAGCTAGATGCTGGTGAATTTGAAGAAGAAATCAAGGGAACTTTCGAAACGGTCTCTAAATCTGATTYTCAAAG
Ro06-1279239	Ro06	1279239	G	C	AGAAGTGCCTGCTGATGAAGACAAACAAGATTTATACACTGCAACGCCAGCAAAAGAGACATGCTTGCAAGCAGACGAGSCCAAAGATTCTGAATTGGCT[G/C]TGCAAAAGCTAGATGCTGGTGAATTTGAAGAAGAAATCAAGGGAACTTTCGAAACGGTCTCTAAATCTGATTYTCAAAGCATTGTTGTAGCTTMTGGAGA
Ro06-1279312	Ro06	1279312	C	T	GACGAGSCCAAAGATTCTGAATTGGCTSTGCAAAAGCTAGATGCTGGTGAATTTGAAGAAGAAATCAAGGGAACTTTCGAAACGGTCTCTAAATCTGATT[C/T]TCAAAGCATTGTTGTAGCTTMTGGAGATGACATCCTTGCTGATCAAACACTCTGTGAGGGGATAACAGACCCGCCACTTTCCAAAGATAGGGAGTTTGGC
Ro06-1279333	Ro06	1279333	C	A	TTGGCTSTGCAAAAGCTAGATGCTGGTGAATTTGAAGAAGAAATCAAGGGAACTTTCGAAACGGTCTCTAAATCTGATTYTCAAAGCATTGTTGTAGCTT[C/A]TGGAGATGACATCCTTGCTGATCAAACACTCTGTGAGGGGATAACAGACCCGCCACTTTCCAAAGATAGGGAGTTTGGCGCTACTGAATTGGCTCTAGAA
Ro06-1279967	Ro06	1279967	G	A	TTCCAAGCACTGTGGCAGTTTCCAGTGAAGAAATCACTGCTGATGAAACAGTCAGTAAGGGGGTAACAGACATGCCACTTGAAATACCATCTTACACTTC[G/A]CTTCATGAGRAAAAGGAGCTCAAGGCTTCTGAATTAAATCTAGAAAAGCTAGATGCAGATATACCTGAAGAAGAAATCAAAGAAGGTTMCGAAGTGATTC
Ro06-1279977	Ro06	1279977	G	A	TGTGGCAGTTTCCAGTGAAGAAATCACTGCTGATGAAACAGTCAGTAAGGGGGTAACAGACATGCCACTTGAAATACCATCTTACACTTCRCTTCATGAG[G/A]AAAAGGAGCTCAAGGCTTCTGAATTAAATCTAGAAAAGCTAGATGCAGATATACCTGAAGAAGAAATCAAAGAAGGTTMCGAAGTGATTCCTCAATCCAA
Ro06-1280056	Ro06	1280056	A	C	TCTTACACTTCRCTTCATGAGRAAAAGGAGCTCAAGGCTTCTGAATTAAATCTAGAAAAGCTAGATGCAGATATACCTGAAGAAGAAATCAAAGAAGGTT[A/C]CGAAGTGATTCCTCAATCCAATTCTCWAAGMACTTATGAAGYCTTGAAAGATGAGATAATTGCTGATCAACTTCAAATACCATCTTCTGCACTGCTTCCT
Ro06-1280083	Ro06	1280083	T	A	GAGCTCAAGGCTTCTGAATTAAATCTAGAAAAGCTAGATGCAGATATACCTGAAGAAGAAATCAAAGAAGGTTMCGAAGTGATTCCTCAATCCAATTCTC[T/A]AAGMACTTATGAAGYCTTGAAAGATGAGATAATTGCTGATCAACTTCAAATACCATCTTCTGCACTGCTTCCTGATGGAAAGGAACTCAAGGCTTCTGAA
Ro06-1280087	Ro06	1280087	A	C	TCAAGGCTTCTGAATTAAATCTAGAAAAGCTAGATGCAGATATACCTGAAGAAGAAATCAAAGAAGGTTMCGAAGTGATTCCTCAATCCAATTCTCWAAG[A/C]ACTTATGAAGYCTTGAAAGATGAGATAATTGCTGATCAACTTCAAATACCATCTTCTGCACTGCTTCCTGATGGAAAGGAACTCAAGGCTTCTGAACATG
Ro06-1280098	Ro06	1280098	T	C	GAATTAAATCTAGAAAAGCTAGATGCAGATATACCTGAAGAAGAAATCAAAGAAGGTTMCGAAGTGATTCCTCAATCCAATTCTCWAAGMACTTATGAAG[T/C]CTTGAAAGATGAGATAATTGCTGATCAACTTCAAATACCATCTTCTGCACTGCTTCCTGATGGAAAGGAACTCAAGGCTTCTGAACATGAGTATGAAACT
Ro06-1280499	Ro06	1280499	G	C	CAAGTCTGATTCTGAAAGCATTTATGCGGTTTCCAAAAATGAACACACAGTTTGTGATGTCATAACAGACATGCCACTTCACATACCATCTTATACTTCA[G/C]TTACCAAGGAAAATGAGCTCRATGCTTCTGAGTTGGCTCTGGAAAAGCTAGACGCCAATGCAACTGAAGAGGTCAAAGAAGGTTCTGAAGTGACACMTAA
Ro06-1280520	Ro06	1280520	G	A	TTATGCGGTTTCCAAAAATGAACACACAGTTTGTGATGTCATAACAGACATGCCACTTCACATACCATCTTATACTTCASTTACCAAGGAAAATGAGCTC[G/A]ATGCTTCTGAGTTGGCTCTGGAAAAGCTAGACGCCAATGCAACTGAAGAGGTCAAAGAAGGTTCTGAAGTGACACMTAAATCTGATTTGCAAAGCATTGA
Ro06-1280596	Ro06	1280596	C	A	TCASTTACCAAGGAAAATGAGCTCRATGCTTCTGAGTTGGCTCTGGAAAAGCTAGACGCCAATGCAACTGAAGAGGTCAAAGAAGGTTCTGAAGTGACAC[C/A]TAAATCTGATTTGCAAAGCATTGATGTAGTTGTCAAAGATGAGATCATTGCCGATCAGGTACTCCATGAAGTTATAACAAAAGATCAACTTCACATTCAA
Ro06-1290875	Ro06	1290875	A	T	TTTGATTATGTAATTACAGTCGGCTATTAGCCCTGATGCTGCCCACATACTCAGTGGTTCTAGTGATGGAAACGCCTACATTTGGCAGGTTAGGATTAGT[A/T]TTCTCCTTAGGTGCTTATTGATATTGTTCTTGGTTATAGGATGACTTTATTGGCCATCTCAATCCAGGTAAACAAGCCTCAAGAAGATCCGGTAATATTG
Ro06-1302411	Ro06	1302411	T	C	GTCGAGTTTGATTTCAACCATATGTCAGAAAAAATGTGTGATATATATTCAAAGCATATGCATGCAGTAGCTTTCAAATTCAAGAAAGACTGCTTATTGT[T/C]TGGCAAAAAGTAAACGAAGTTTGAAATTAAACAACAGGGTGATGTTTTCTTATGTACKCATATGTCAACTAGTAGTCCAAATTAAGCTGTAACCCTAGAT
Ro06-1302469	Ro06	1302469	G	T	TGCATGCAGTAGCTTTCAAATTCAAGAAAGACTGCTTATTGTYTGGCAAAAAGTAAACGAAGTTTGAAATTAAACAACAGGGTGATGTTTTCTTATGTAC[G/T]CATATGTCAACTAGTAGTCCAAATTAAGCTGTAACCCTAGATTGTAGAATACCATAAGCTTTTCATACTCAACTGATTCATCAAATATGATATATATATA
Ro06-1308135	Ro06	1308135	T	C	CTTGACCCCTCGAACCTTCTATAAAATATCACCACCTCCACCTCGCTTATCTCAGTCACTACATCTTCTATACTAGCAAACTAAAACTCATTTTCAACAA[T/C]ACTCGGAAARCTAAGCYCTCARAGCATCAGCAATGGCCGACCGTCCTCAGCCACACCAGATCCAAGTCCGCCCTGCGCAATCACGATTTGAAACTCCGGG
Ro06-1308145	Ro06	1308145	G	A	CGAACCTTCTATAAAATATCACCACCTCCACCTCGCTTATCTCAGTCACTACATCTTCTATACTAGCAAACTAAAACTCATTTTCAACAAYACTCGGAAA[G/A]CTAAGCYCTCARAGCATCAGCAATGGCCGACCGTCCTCAGCCACACCAGATCCAAGTCCGCCCTGCGCAATCACGATTTGAAACTCCGGGCTACCAGGTC
Ro06-1308152	Ro06	1308152	T	C	TCTATAAAATATCACCACCTCCACCTCGCTTATCTCAGTCACTACATCTTCTATACTAGCAAACTAAAACTCATTTTCAACAAYACTCGGAAARCTAAGC[T/C]CTCARAGCATCAGCAATGGCCGACCGTCCTCAGCCACACCAGATCCAAGTCCGCCCTGCGCAATCACGATTTGAAACTCCGGGCTACCAGGTCRGCGGTG
Ro06-1308157	Ro06	1308157	A	G	AAAATATCACCACCTCCACCTCGCTTATCTCAGTCACTACATCTTCTATACTAGCAAACTAAAACTCATTTTCAACAAYACTCGGAAARCTAAGCYCTCA[A/G]AGCATCAGCAATGGCCGACCGTCCTCAGCCACACCAGATCCAAGTCCGCCCTGCGCAATCACGATTTGAAACTCCGGGCTACCAGGTCRGCGGTGSCGAC
Ro06-1308246	Ro06	1308246	A	G	CTAAGCYCTCARAGCATCAGCAATGGCCGACCGTCCTCAGCCACACCAGATCCAAGTCCGCCCTGCGCAATCACGATTTGAAACTCCGGGCTACCAGGTC[A/G]GCGGTGSCGACTACAAGGGCATGCAGTCTCAGCAACAAAAGCGTGGCTCATCGACCGGCAAGATCCTCGCAGTGGTAACTCTCCTTCCTGTCGGTGGAAC
Ro06-1308253	Ro06	1308253	G	C	CTCARAGCATCAGCAATGGCCGACCGTCCTCAGCCACACCAGATCCAAGTCCGCCCTGCGCAATCACGATTTGAAACTCCGGGCTACCAGGTCRGCGGTG[G/C]CGACTACAAGGGCATGCAGTCTCAGCAACAAAAGCGTGGCTCATCGACCGGCAAGATCCTCGCAGTGGTAACTCTCCTTCCTGTCGGTGGAACCCTGCTT
Ro06-1342259	Ro06	1342259	C	T	AAAAGCGACATCGTCTCCATCAATCCTGCAGCTTGATGGCTTCTCAGACGCAAACACCCTCATCTCTCCGGTGCCCTTCACTCCGATTTGAACGGAGTTC[C/T]CCTCCTTRTTGTAAACCAACGACTTGACAGCACCACCGGTGTTGAGCATGTTCACTAGGCCAATAGGGGCAAATTGGACAGACTTGCTAGGCAAAGTAGT
Ro06-1342267	Ro06	1342267	G	A	CATCGTCTCCATCAATCCTGCAGCTTGATGGCTTCTCAGACGCAAACACCCTCATCTCTCCGGTGCCCTTCACTCCGATTTGAACGGAGTTCYCCTCCTT[G/A]TTGTAAACCAACGACTTGACAGCACCACCGGTGTTGAGCATGTTCACTAGGCCAATAGGGGCAAATTGGACAGACTTGCTAGGCAAAGTAGTCACCGGAG
Ro06-1350779	Ro06	1350779	G	C	TGCAATACAATTGAAACATAGGAAACACGGTGTCGTCTTTCACTACAACCTCTGCATGCTTCCTGGTCAAAACAACCCACTGCAACAAGAAAATGAAATA[G/C]ACAAGAATAAGACGATCTGTAGAAAAGTCGGAGAAAAAACAAAACCAGTTTGTTAGGGTTTTTAGTATTGCAATAAAATTCAGGAAGCAGTTATTCCATC
Ro06-1350888	Ro06	1350888	T	C	AAGACGATCTGTAGAAAAGTCGGAGAAAAAACAAAACCAGTTTGTTAGGGTTTTTAGTATTGCAATAAAATTCAGGAAGCAGTTATTCCATCATATTGAA[T/C]CCTTACCTGAGATCCTTTTCTCCAGTTGTGTACAGGAATAACAGGATCCATTTTTGGATTGTAGCGGCCCTCTTTTGTATCAGCAAAGCTGTTTCCAGAA
Ro06-1351190	Ro06	1351190	G	A	CTAATCCATGTTTGAAATGGATGCACAATATTGAAATGCAGCTTGAACATGAAACCCAAATAGTTTTCATCAATTAAGATCATAATGACTTGAATTCAAC[G/A]AGTTTCAACTATTAAGGGACATATACGCCAACTGCTGACTGGCAGACCACAGACAACCATTTCTATCATATTTTCATTATAATACATATCTGTGTTGGTC
Ro06-1351649	Ro06	1351649	A	G	AAGTGCATGTTTGAGCAATATCCGCTCTGCTTCAATCATGGTTGCTTCTCCCCAATCTACCTGGTATAGAACACATGAGATAAATACAATGATCTCCATA[A/G]AAACCATGCAAAACAAAATCCTACTTGCTCACACAAKTCAACTGAATCCTTCAGCTTAYRTAAGTAAAATTCACTCCAAGTAGCATACTGGCATGTACAG
Ro06-1351686	Ro06	1351686	T	G	ATGGTTGCTTCTCCCCAATCTACCTGGTATAGAACACATGAGATAAATACAATGATCTCCATARAAACCATGCAAAACAAAATCCTACTTGCTCACACAA[T/G]TCAACTGAATCCTTCAGCTTAYRTAAGTAAAATTCACTCCAAGTAGCATACTGGCATGTACAGTATGAGTTGTTCAATAAAAAGCCAAGAAAACCAATTC
Ro06-1351708	Ro06	1351708	C	T	CCTGGTATAGAACACATGAGATAAATACAATGATCTCCATARAAACCATGCAAAACAAAATCCTACTTGCTCACACAAKTCAACTGAATCCTTCAGCTTA[C/T]RTAAGTAAAATTCACTCCAAGTAGCATACTGGCATGTACAGTATGAGTTGTTCAATAAAAAGCCAAGAAAACCAATTCAAACATTTCAAGTGCATGCCTT
Ro06-1351709	Ro06	1351709	A	G	CTGGTATAGAACACATGAGATAAATACAATGATCTCCATARAAACCATGCAAAACAAAATCCTACTTGCTCACACAAKTCAACTGAATCCTTCAGCTTAY[A/G]TAAGTAAAATTCACTCCAAGTAGCATACTGGCATGTACAGTATGAGTTGTTCAATAAAAAGCCAAGAAAACCAATTCAAACATTTCAAGTGCATGCCTTA
Ro06-1353451	Ro06	1353451	T	G	GCCAGCAATTGACTTCTAATTGAAGTAGTTGGCTAATGAAGTTGGCAGATCTATAAGCAATGAACATGATCAACTTAGTAATCATCATTTTAAAAACGTG[T/G]ATGCAAAATGGCATTTTCATAGTCTTTTCAAARATGATAYGACATAATGAAGTCTCAAAATTGGTAAGAGCATTCGACATGTCCATTTTGTTTAATACAT
Ro06-1353484	Ro06	1353484	G	A	TAATGAAGTTGGCAGATCTATAAGCAATGAACATGATCAACTTAGTAATCATCATTTTAAAAACGTGKATGCAAAATGGCATTTTCATAGTCTTTTCAAA[G/A]ATGATAYGACATAATGAAGTCTCAAAATTGGTAAGAGCATTCGACATGTCCATTTTGTTTAATACATTTCAAAATATCGAGTTCAAGAGTCTCTTCCAAA
Ro06-1353491	Ro06	1353491	C	T	GTTGGCAGATCTATAAGCAATGAACATGATCAACTTAGTAATCATCATTTTAAAAACGTGKATGCAAAATGGCATTTTCATAGTCTTTTCAAARATGATA[C/T]GACATAATGAAGTCTCAAAATTGGTAAGAGCATTCGACATGTCCATTTTGTTTAATACATTTCAAAATATCGAGTTCAAGAGTCTCTTCCAAATATTTTT
Ro06-1373374	Ro06	1373374	G	T	TGGGGGCTCCCCTGGTGCCATACTGGTGGCTCTGAATTCCAATCTTACTTATTATCTTCTAATTGTAGATGTTGAAATATATTGGCGTGAACGGGATTTA[G/T]TACTCATTACTCCTATCCATAAAGAAGGTTTTGGGATAGGTGGGCGTGCAAAATATGAGGTGAGCACTATCTTGTATWTGATTTGCAAWTAAGTGTTAAA
Ro06-1373452	Ro06	1373452	A	T	ATATTGGCGTGAACGGGATTTAKTACTCATTACTCCTATCCATAAAGAAGGTTTTGGGATAGGTGGGCGTGCAAAATATGAGGTGAGCACTATCTTGTAT[A/T]TGATTTGCAAWTAAGTGTTAAATTGAAAAATAACGGTATGCATGTTGAATTTTTCATGGAGGGTTGTTATGGAAGACTGCTTCTTGTACAAATGTAATAC
Ro06-1373463	Ro06	1373463	A	T	AACGGGATTTAKTACTCATTACTCCTATCCATAAAGAAGGTTTTGGGATAGGTGGGCGTGCAAAATATGAGGTGAGCACTATCTTGTATWTGATTTGCAA[A/T]TAAGTGTTAAATTGAAAAATAACGGTATGCATGTTGAATTTTTCATGGAGGGTTGTTATGGAAGACTGCTTCTTGTACAAATGTAATACTCAGATATTAC
Ro06-1378963	Ro06	1378963	G	C	ACATGCCAATCGACTTTAGAAGTAAGTTTTGAAGTGTATAAATCTGGAGATTACAAGGATTTTGATAAGCTGCTTGATCGATGTATTGAAACTTGAGAGA[G/C]TTGTTAATTGGCACCACTTTTGCTGGGCTGGCAAGATCACATATTCCGATAGATTGGTGTAGGCAAAAGGCCCTTTTTTAGTTTTCAGAGAAGGCTGAAC
Ro06-1380389	Ro06	1380389	G	A	GAAGCATGATATATCTTCTGAGTATACATGTTTTTTTTTTTCTTGTGTATATTCTTATTGCACCTTCTGTGCTGCAGAACATGCAATGTGGGGAGATTGT[G/A]ACAATAGAAAGCCAAACTTATACAATCTCAGCTGTAACTCATAGGTACCAGCTTCGGAAGGGGAAGTACGAACYAAGYGAGAAGAGGCTCGATGTTTTGT
Ro06-1380463	Ro06	1380463	C	T	CAGAACATGCAATGTGGGGAGATTGTRACAATAGAAAGCCAAACTTATACAATCTCAGCTGTAACTCATAGGTACCAGCTTCGGAAGGGGAAGTACGAAC[C/T]AAGYGAGAAGAGGCTCGATGTTTTGTCCACAGCGAGATATGTCTTGAATATATATTTGGATAATTTACTGGAACAATCTTAGACTTCTACTTTAAGTTAG
Ro06-1380467	Ro06	1380467	C	T	ACATGCAATGTGGGGAGATTGTRACAATAGAAAGCCAAACTTATACAATCTCAGCTGTAACTCATAGGTACCAGCTTCGGAAGGGGAAGTACGAACYAAG[C/T]GAGAAGAGGCTCGATGTTTTGTCCACAGCGAGATATGTCTTGAATATATATTTGGATAATTTACTGGAACAATCTTAGACTTCTACTTTAAGTTAGTTCC
Ro06-1384812	Ro06	1384812	G	C	GCAGAAAGACCAGTATCTATAGAGGCAGCACTGGAAGTGATGTTAGTGATGAGAGCAGCTCCAGTAGTTTGAGCAATAACATGTACAAGCCCCACAAGGC[G/C]AATGATGTAAGATGGGAAGCAATTCAAGCTGTCCGAGATCATGATGGAATGCTGGGTTTGACTCATTTCAAGTTGTTGAAGAGACTGGGATGTGGAGATA
Ro06-1386028	Ro06	1386028	A	G	CTTCAAACTCAAGCATGGAGACAAAGAAATCAGCATATTGTGTTCAGCCTGCATGCATCGAGCCAACTTGTGTAATGCAGCCAGATTGCATTACACCTGC[A/G]TGCTTTGCTCCACGTTTTTTCTCAAGCAAGCCCAAGAAAGACAAGAAAAAGACCAAGCCAAAGAATGATATATATAATCAAGTGAGCCCTCTCCCTGAGC
Ro06-1400244	Ro06	1400244	T	C	ACATGTCTACATCTTATTCCTCTGAGTTGAAAATATTATACCACATCCAATGATCGGGAGTGTCCCAATCTCATATCAACGCTAATCATTTTCTTTTGCT[T/C]GACCACAAGTGTTGGAATAGGTATCTAATGCTCGATTTGGTTCAGATCTAGTTGTTTGATTTATTTTTTTGTTTTGTTTCACGAGATTATTTCTACTGAT
Ro06-1417278	Ro06	1417278	C	G	TGAGAATGAGCTTAAAATGTATTTTCTGGTACTCTACTGTTGTAGGTTTCAACAGAATGGCCTGGCTTTCCGACTGGTGTGAAGTTTGATCCATCTGATG[C/G]TGAACTCATAGAACATTTAGCTGCGAAATGCGGTGTTGGAAACTCAAAACCGCACATGTTTATTAATGAGTTCATCCCAACTATTGAGGGGGACATCGGC
Ro06-1421589	Ro06	1421589	T	C	TGCCAGTGCCCCGACATGATCCGGAGCTATTTACCCTAGAGCAGCTTCAAGCTTTTAAGAAGATTGGCTTCAGAAATAAAAACTATGTTCCTGTTGGTGT[T/C]CGTGGGGTCTTTGGAGGAGTTGTCCAGAATATGCACATGCACTGGAAGTTTCACGAGACCGTACAAGTTTGTTGTGATAATTTCCCTAAGGAGAAAATCA
Ro06-1430483	Ro06	1430483	G	A	AGTATATGACATTCTCTGTTCATGCCACTCGTATATGCCAACTTAATTTTTTTGATCTCTTTGCATAAATTTTCTAACTTTTGATCCCGTGGTAGAGGTT[G/A]TATAGSGGAAATTCTGACTCTCATCTTCACCACTTTACAAGAYAATGACTAAACAACCTTTATGGTATGTTAACACACACATGTAGAGACGTAGAGTTGG
Ro06-1430489	Ro06	1430489	C	G	TGACATTCTCTGTTCATGCCACTCGTATATGCCAACTTAATTTTTTTGATCTCTTTGCATAAATTTTCTAACTTTTGATCCCGTGGTAGAGGTTRTATAG[C/G]GGAAATTCTGACTCTCATCTTCACCACTTTACAAGAYAATGACTAAACAACCTTTATGGTATGTTAACACACACATGTAGAGACGTAGAGTTGGAATGTT
Ro06-1430526	Ro06	1430526	T	C	TAATTTTTTTGATCTCTTTGCATAAATTTTCTAACTTTTGATCCCGTGGTAGAGGTTRTATAGSGGAAATTCTGACTCTCATCTTCACCACTTTACAAGA[T/C]AATGACTAAACAACCTTTATGGTATGTTAACACACACATGTAGAGACGTAGAGTTGGAATGTTAGCAAAAATACCCAACTTCTTTTAGAAATGCCAAGTG
Ro06-1434628	Ro06	1434628	A	G	GGTGTAGAAAGCCAGTGGGCACCTGTTGCTGTTCGTTGTTCAGTAAGATAGTTCTCTCTCTCTCTCTCTCTCTCTCTCTCTCTCTCTCACACACACACAC[A/G]CACACACACACATCTTTCATAAATASTATATCAGCTATGACCAAGCAATGTCAGCTGGACATGTAGAGTTTTTCTACCTTACTGCAAACAATATATGACC
Ro06-1434654	Ro06	1434654	G	C	TGCTGTTCGTTGTTCAGTAAGATAGTTCTCTCTCTCTCTCTCTCTCTCTCTCTCTCTCTCTCACACACACACACRCACACACACACATCTTTCATAAATA[G/C]TATATCAGCTATGACCAAGCAATGTCAGCTGGACATGTAGAGTTTTTCTACCTTACTGCAAACAATATATGACCAATACTATTTTACTGCTTATGAAAAG
Ro06-1437011	Ro06	1437011	C	T	CTCCCATCTTTTAGGACCTCCTTAGTCGCAATGCAAGCTTGGCTGAGGATGTGGTAGCAACTGGTGGGGGTGGTCATTCTCGGTCTGATCAAGGTGCAAG[C/T]TCAGATAGAGTCCATGTAGAGACACTGAGACGAGATCTTCAAGAAGCATCTAAGCGGTTGGAGTTGCTCAAGGCAGAGAAAGCCAAGATTGAATCTGAGG
Ro06-1457802	Ro06	1457802	C	T	TCTTGCTCTATGACTAGTTATTGACTGACTGACTGGTTTTAAGGATAAAGGTTATTATTACGTGGGACAAAGATGGGCGTGAGACGCATGTGCTTTGAAA[C/T]CGTRAGTGACAGTGAACCGGACCGGATCATGATCTCTGATTCTCGATGTTCAAAATACACATGGGTTGGTTTGTTCACACTTCACTTCGCCAAGGACTAA
Ro06-1457806	Ro06	1457806	A	G	GCTCTATGACTAGTTATTGACTGACTGACTGGTTTTAAGGATAAAGGTTATTATTACGTGGGACAAAGATGGGCGTGAGACGCATGTGCTTTGAAAYCGT[A/G]AGTGACAGTGAACCGGACCGGATCATGATCTCTGATTCTCGATGTTCAAAATACACATGGGTTGGTTTGTTCACACTTCACTTCGCCAAGGACTAACCTT
Ro06-1463194	Ro06	1463194	G	C	AGAAGAGTAAAAAGAACACTGCATGATCCGGCCAGCAACTTAGCTTCAACTTAAAGAGTATCTAATGTAGAGAAGTTTGTTCTACCAAATACGAACTTAC[G/C]AAGAGTGAAAATTGGTGAAAGAGGAAAGCTAGCTGAAGAGGGTTCAATATTACATATCTTCYTCCTCGTATTCGGCCATTTTTGCATTCGGGCATATCAT
Ro06-1463256	Ro06	1463256	T	C	TAATGTAGAGAAGTTTGTTCTACCAAATACGAACTTACSAAGAGTGAAAATTGGTGAAAGAGGAAAGCTAGCTGAAGAGGGTTCAATATTACATATCTTC[T/C]TCCTCGTATTCGGCCATTTTTGCATTCGGGCATATCATGTGCTTGTAGTTGTATTTACCATCCAAGTAAAGGACATGTTGGAGGCACCATCATGGGTTTC
Ro06-1466497	Ro06	1466497	C	G	AAGTATAGCCAACCTACTTACTTGCAGAGTATTGAGAAATGCATGCCTTCATGCTCACATTCCAACTTGCATCTGGATCATCGTAAGAATTGCACAGATG[C/G]GGTYGGGTCCAAGGATCTCTCTTCAAGTAACAACTATTAGTCAGTGGCTTGGCCCATACAACACTCTGCTCTTTCTTTGCTACAACTTTCCAGCACATTC
Ro06-1466501	Ro06	1466501	T	C	ATAGCCAACCTACTTACTTGCAGAGTATTGAGAAATGCATGCCTTCATGCTCACATTCCAACTTGCATCTGGATCATCGTAAGAATTGCACAGATGSGGT[T/C]GGGTCCAAGGATCTCTCTTCAAGTAACAACTATTAGTCAGTGGCTTGGCCCATACAACACTCTGCTCTTTCTTTGCTACAACTTTCCAGCACATTCTTTT
Ro06-1470907	Ro06	1470907	T	C	TGAATTTCGAGACCTCCAATTAGAATTTAACATGTTAAATATGGGCATCGTGATGGAAACTTTCTGGCATGCGATAACAAAGATTTATTGTTTGAGAAAG[T/C]GAACTTTCCTTTTATTAGAGAATGGTTTGACTTTGACCGACTTATACAAAGATTTAGAGCAAGTCCACCGGTAAGGAATTCCCATGGCACCACATCAGCT
Ro06-1477325	Ro06	1477325	T	A	GTTTACCTGAGTATTCCATGGAAGCCTTAAAGCATTTTGTTTCTGTTGCATGCTTATGCAATCTGTGTTGTTTTATACTGTGATCTATTGTGTTCCTGAG[T/A]GTTGATGACTMGGTTTAACATTTTACATGGTCTTGAACAGGTCTGCCCCATCTGCCTTACAAATGCMAAAGACATGGCCTTTGGCTGTGGGCATCAGGTA
Ro06-1477336	Ro06	1477336	A	C	TATTCCATGGAAGCCTTAAAGCATTTTGTTTCTGTTGCATGCTTATGCAATCTGTGTTGTTTTATACTGTGATCTATTGTGTTCCTGAGWGTTGATGACT[A/C]GGTTTAACATTTTACATGGTCTTGAACAGGTCTGCCCCATCTGCCTTACAAATGCMAAAGACATGGCCTTTGGCTGTGGGCATCAGGTATTTTAATTTAA
Ro06-1477392	Ro06	1477392	A	C	TTGTTTTATACTGTGATCTATTGTGTTCCTGAGWGTTGATGACTMGGTTTAACATTTTACATGGTCTTGAACAGGTCTGCCCCATCTGCCTTACAAATGC[A/C]AAAGACATGGCCTTTGGCTGTGGGCATCAGGTATTTTAATTTAAAATATGTTTTCTCAAGAGATGAACCRAGGGTAGAACATTATTATTATTATTGTTTA
Ro06-1477462	Ro06	1477462	A	G	ACAGGTCTGCCCCATCTGCCTTACAAATGCMAAAGACATGGCCTTTGGCTGTGGGCATCAGGTATTTTAATTTAAAATATGTTTTCTCAAGAGATGAACC[A/G]AGGGTAGAACATTATTATTATTATTGTTTATTTTAATTTACMTTTTTGTTGTTTCAGACATGTTGCGAATGCGGACAAGATCTTCAGACATGCCCAATAT
Ro06-1477504	Ro06	1477504	A	C	CTTTGGCTGTGGGCATCAGGTATTTTAATTTAAAATATGTTTTCTCAAGAGATGAACCRAGGGTAGAACATTATTATTATTATTGTTTATTTTAATTTAC[A/C]TTTTTGTTGTTTCAGACATGTTGCGAATGCGGACAAGATCTTCAGACATGCCCAATATGCCGAAGCCCAATCCAGACCMGAATAAAACTCTATTAACGAG
Ro06-1477583	Ro06	1477583	A	C	TTATTGTTTATTTTAATTTACMTTTTTGTTGTTTCAGACATGTTGCGAATGCGGACAAGATCTTCAGACATGCCCAATATGCCGAAGCCCAATCCAGACC[A/C]GAATAAAACTCTATTAACGAGCTGCTTCTTCTACATAATCTCTCATCAGTGAAGGCTGCTGACATTCTTTGATTTTTTTTGTTTTGTTTGGGYTCTTTTG
Ro06-1477676	Ro06	1477676	T	C	CCAGACCMGAATAAAACTCTATTAACGAGCTGCTTCTTCTACATAATCTCTCATCAGTGAAGGCTGCTGACATTCTTTGATTTTTTTTGTTTTGTTTGGG[T/C]TCTTTTGGGGGGTCWGTATATTCCTTGTAATTCATTWCTTCTTTAGACCATCAGCGTGTTGGGTTTTGCCGAATTCACAACATAAGGAATTGAAATATTG
Ro06-1477691	Ro06	1477691	T	A	ACTCTATTAACGAGCTGCTTCTTCTACATAATCTCTCATCAGTGAAGGCTGCTGACATTCTTTGATTTTTTTTGTTTTGTTTGGGYTCTTTTGGGGGGTC[T/A]GTATATTCCTTGTAATTCATTWCTTCTTTAGACCATCAGCGTGTTGGGTTTTGCCGAATTCACAACATAAGGAATTGAAATATTGCCACCATCTGTACAT
Ro06-1477713	Ro06	1477713	A	T	TCTACATAATCTCTCATCAGTGAAGGCTGCTGACATTCTTTGATTTTTTTTGTTTTGTTTGGGYTCTTTTGGGGGGTCWGTATATTCCTTGTAATTCATT[A/T]CTTCTTTAGACCATCAGCGTGTTGGGTTTTGCCGAATTCACAACATAAGGAATTGAAATATTGCCACCATCTGTACATTATTGTAATTGACTTGTAGATG
Ro06-1478226	Ro06	1478226	C	T	AATAGTCACTAGCAAGTGACTAAGTTCGTCACCTGCATAAGCAATTCAATATTAATCCTTATTCATTAATAAGATGGTTGATGACTTGATGACCCATCGT[C/T]TATCTTGAATTCTCGTTGGATCGTCATTATCTATTTATGTATAGTCGATGATAGTGCTCATTCATGCAGTACCATCTTCTCACTCATGACTCCGTTTGTT
Ro06-1483114	Ro06	1483114	T	G	ACGATTTATTTAAATTTCTATGTAGTTTGATTAGCGATGAACCTTCATACATGCAAGCTATTATTTTGCATCTACTGACATTTTAAAAGCCTTCAAGTTC[T/G]ATTTGAATCTGAGTGCACTACATATTTAATCAATTCTTTTTTGGTGACTTGACATACGTCAATCTAAATTTGTGTTAAGTTGTTTTCACTGCTGTTYYTT
Ro06-1483211	Ro06	1483211	T	C	TTCKATTTGAATCTGAGTGCACTACATATTTAATCAATTCTTTTTTGGTGACTTGACATACGTCAATCTAAATTTGTGTTAAGTTGTTTTCACTGCTGTT[T/C]YTTTCGATGTAGATGCTATTTAAACTGTGGGGATATTGATCGTGCTGTGCAAACGATTGAGAAATATCTAAGTTCAGGGAGGCTTCCTGCATCAGAACTC
Ro06-1483212	Ro06	1483212	T	C	TCKATTTGAATCTGAGTGCACTACATATTTAATCAATTCTTTTTTGGTGACTTGACATACGTCAATCTAAATTTGTGTTAAGTTGTTTTCACTGCTGTTY[T/C]TTTCGATGTAGATGCTATTTAAACTGTGGGGATATTGATCGTGCTGTGCAAACGATTGAGAAATATCTAAGTTCAGGGAGGCTTCCTGCATCAGAACTCT
Ro06-1489396	Ro06	1489396	T	A	TGAAATAGAAAGAAAAAGGTATGTAAACACAGCTGAGACCGATCATAGTTCATAAGTTTATTACGTGATTCGTATGCATCTAGCACATGATCTCAAACTC[T/A]AAATATTCTTTTAACTATCTCCCGGTTTCTCTTTAAGAAYACGCACCACAAGTGTTATGTAAACACACACAATTCTCTCTCACTCACCTGGTTATGTCAT
Ro06-1489436	Ro06	1489436	C	T	GATCATAGTTCATAAGTTTATTACGTGATTCGTATGCATCTAGCACATGATCTCAAACTCWAAATATTCTTTTAACTATCTCCCGGTTTCTCTTTAAGAA[C/T]ACGCACCACAAGTGTTATGTAAACACACACAATTCTCTCTCACTCACCTGGTTATGTCATAAACCAGCAGTGCTCCAGCTGCTCCTCTGTAGTAAGATCT
Ro06-1505568	Ro06	1505568	A	G	CGATCACTTCATCATGCAATAATATTAACATGTAACTACTAACTAGTGTGCCTAAACAAATATTTGGCACATTGCCAAATTTGAGACATTTGGTCAAGCC[A/G]GTGTGTTRRTGGGTACAATTCAAGAAAGGCACGTGTTATASCTGAGGAKATATGTGTGCTCTTGACACGACTATACATTCATGAGATGATTTAACAAACC
Ro06-1505576	Ro06	1505576	A	G	TCATCATGCAATAATATTAACATGTAACTACTAACTAGTGTGCCTAAACAAATATTTGGCACATTGCCAAATTTGAGACATTTGGTCAAGCCRGTGTGTT[A/G]RTGGGTACAATTCAAGAAAGGCACGTGTTATASCTGAGGAKATATGTGTGCTCTTGACACGACTATACATTCATGAGATGATTTAACAAACCATGGGATT
Ro06-1505577	Ro06	1505577	G	A	CATCATGCAATAATATTAACATGTAACTACTAACTAGTGTGCCTAAACAAATATTTGGCACATTGCCAAATTTGAGACATTTGGTCAAGCCRGTGTGTTR[G/A]TGGGTACAATTCAAGAAAGGCACGTGTTATASCTGAGGAKATATGTGTGCTCTTGACACGACTATACATTCATGAGATGATTTAACAAACCATGGGATTG
Ro06-1505609	Ro06	1505609	G	C	ACTAGTGTGCCTAAACAAATATTTGGCACATTGCCAAATTTGAGACATTTGGTCAAGCCRGTGTGTTRRTGGGTACAATTCAAGAAAGGCACGTGTTATA[G/C]CTGAGGAKATATGTGTGCTCTTGACACGACTATACATTCATGAGATGATTTAACAAACCATGGGATTGTAATTCGTTGCCACATAAGCTCGGCTTAGTGT
Ro06-1505617	Ro06	1505617	G	T	GCCTAAACAAATATTTGGCACATTGCCAAATTTGAGACATTTGGTCAAGCCRGTGTGTTRRTGGGTACAATTCAAGAAAGGCACGTGTTATASCTGAGGA[G/T]ATATGTGTGCTCTTGACACGACTATACATTCATGAGATGATTTAACAAACCATGGGATTGTAATTCGTTGCCACATAAGCTCGGCTTAGTGTTCATAAAC
Ro06-1557755	Ro06	1557755	T	A	TTGAAATGGAGAAGCACAAGATTGATTCGTTTCACGCATCCCATAAGATTTGCTAATTGTTGGCATGCCCATCACAAGATATAGCTGGATTTTATGCGCA[T/A]CAAGATCAAGGCCAGGAGAGGTGTGATTTTTAGTTGAAAGCATATCAATTATAGAGTTGCATGGGCTGCTACTTGCTATTCTATTATTGTTACATTGTGG
Ro06-1578022	Ro06	1578022	T	A	GAATATCGCCAAAACAATACCTTTGTAAAAATAGCATATGATTTTAGTGTTTGAGAGACACTATAGATCTCTGTTTCCCAAAGTATGCCATCGCTAGCTG[T/A]AGTATTAATTCCTCCTTGCRCAATAGCACTTKCATAATGTACTATGGKAATTCTAGTGATAATCACCAAGCGTCTGAAAATGTATACARCTTTTGTTTTK
Ro06-1578042	Ro06	1578042	G	A	CTTTGTAAAAATAGCATATGATTTTAGTGTTTGAGAGACACTATAGATCTCTGTTTCCCAAAGTATGCCATCGCTAGCTGWAGTATTAATTCCTCCTTGC[G/A]CAATAGCACTTKCATAATGTACTATGGKAATTCTAGTGATAATCACCAAGCGTCTGAAAATGTATACARCTTTTGTTTTKCTGGCYAAAATGTATAAAGC
Ro06-1578054	Ro06	1578054	G	T	AGCATATGATTTTAGTGTTTGAGAGACACTATAGATCTCTGTTTCCCAAAGTATGCCATCGCTAGCTGWAGTATTAATTCCTCCTTGCRCAATAGCACTT[G/T]CATAATGTACTATGGKAATTCTAGTGATAATCACCAAGCGTCTGAAAATGTATACARCTTTTGTTTTKCTGGCYAAAATGTATAAAGCTTSGTTTGGTCC
Ro06-1578070	Ro06	1578070	G	T	GTTTGAGAGACACTATAGATCTCTGTTTCCCAAAGTATGCCATCGCTAGCTGWAGTATTAATTCCTCCTTGCRCAATAGCACTTKCATAATGTACTATGG[G/T]AATTCTAGTGATAATCACCAAGCGTCTGAAAATGTATACARCTTTTGTTTTKCTGGCYAAAATGTATAAAGCTTSGTTTGGTCCAACATGTATTGATACT
Ro06-1578111	Ro06	1578111	G	A	ATCGCTAGCTGWAGTATTAATTCCTCCTTGCRCAATAGCACTTKCATAATGTACTATGGKAATTCTAGTGATAATCACCAAGCGTCTGAAAATGTATACA[G/A]CTTTTGTTTTKCTGGCYAAAATGTATAAAGCTTSGTTTGGTCCAACATGTATTGATACTATATTGCAACTATTATATATGTAAAAAGTAGGTGTACGTTG
Ro06-1578122	Ro06	1578122	T	G	WAGTATTAATTCCTCCTTGCRCAATAGCACTTKCATAATGTACTATGGKAATTCTAGTGATAATCACCAAGCGTCTGAAAATGTATACARCTTTTGTTTT[T/G]CTGGCYAAAATGTATAAAGCTTSGTTTGGTCCAACATGTATTGATACTATATTGCAACTATTATATATGTAAAAAGTAGGTGTACGTTGTTCTAACTTAA
Ro06-1578128	Ro06	1578128	C	T	TAATTCCTCCTTGCRCAATAGCACTTKCATAATGTACTATGGKAATTCTAGTGATAATCACCAAGCGTCTGAAAATGTATACARCTTTTGTTTTKCTGGC[C/T]AAAATGTATAAAGCTTSGTTTGGTCCAACATGTATTGATACTATATTGCAACTATTATATATGTAAAAAGTAGGTGTACGTTGTTCTAACTTAATTTCTG
Ro06-1578145	Ro06	1578145	C	G	ATAGCACTTKCATAATGTACTATGGKAATTCTAGTGATAATCACCAAGCGTCTGAAAATGTATACARCTTTTGTTTTKCTGGCYAAAATGTATAAAGCTT[C/G]GTTTGGTCCAACATGTATTGATACTATATTGCAACTATTATATATGTAAAAAGTAGGTGTACGTTGTTCTAACTTAATTTCTGTACAGTAAATCACATCT
Ro06-1612772	Ro06	1612772	A	C	TTGTTTGAGGGGATTCTTTTAACCATAAGACCCCTTGATGATACCATAACTTCCATTTATGATATCTCATTGTGTTCCCAACTAAAGCAAAGCCTAAAAT[A/C]AAACTCCATTGGCATCTCAAATAAGGCAACTGGTTAACATGAACATTGCAGTCGCATAATAGTTTACAGGGCAAACAGACAAGGAATGACATTGAATTTA
Ro06-1621568	Ro06	1621568	A	C	TTTGTTAATGCATGTAGACTTTTATTTTTAATAAAAAAATTTGTTGCAGAAACGTTTCGACCAGCACTGTTGCTAAGATGGCCATCTCTAACAAACAAAG[A/C]GGTAACCGCCGACTCTCCGATCACCATTTCAGTTCGAGAAGTAGTTATGCTTCCAGATCAGGCACTAGTTTTCCTAAACTACCCAGGAACCGCTCGCTTA
Ro06-1633905	Ro06	1633905	A	G	AAGCCGTACTTGGCCAGCGAAGCACCGGAACTCGTGATAGGAACGGGAATATACGTCGGATACATGTACGTCATGTTACAGCCATTGGAAACAGGCTTCA[A/G]CAAACCATARAGTCCCGCAAAACCAACGCACAGCACCAAAACAATGAGCAGTGCTATTCTGGATTTCGCTTTGAGCCCTAGCACTTGCATCGTGATGAGT
Ro06-1633915	Ro06	1633915	A	G	TGGCCAGCGAAGCACCGGAACTCGTGATAGGAACGGGAATATACGTCGGATACATGTACGTCATGTTACAGCCATTGGAAACAGGCTTCARCAAACCATA[A/G]AGTCCCGCAAAACCAACGCACAGCACCAAAACAATGAGCAGTGCTATTCTGGATTTCGCTTTGAGCCCTAGCACTTGCATCGTGATGAGTCAGAGAGACC
Ro06-1644951	Ro06	1644951	A	C	GGTGAATACTTAAGAGATTAGCTAGAGAGACATGCCAAGAAGGAAATAAAGCAGCAATCTTTGGAGAAATTCATGAATGTTCTTAGATACTTACAGAGAA[A/C]GTTGAGGTGCTTCTGCTRCTGCTTCCTATTTCTTTAAGAGAGAGAAAGAGAAAGAGAAATAGAAATTTTCAGTAAATAAAAGAAAAAGGTGGGTGGRTGT
Ro06-1644969	Ro06	1644969	A	G	TAGCTAGAGAGACATGCCAAGAAGGAAATAAAGCAGCAATCTTTGGAGAAATTCATGAATGTTCTTAGATACTTACAGAGAAMGTTGAGGTGCTTCTGCT[A/G]CTGCTTCCTATTTCTTTAAGAGAGAGAAAGAGAAAGAGAAATAGAAATTTTCAGTAAATAAAAGAAAAAGGTGGGTGGRTGTTGAAGAACAGCAATCTTT
Ro06-1645048	Ro06	1645048	G	A	GAAMGTTGAGGTGCTTCTGCTRCTGCTTCCTATTTCTTTAAGAGAGAGAAAGAGAAAGAGAAATAGAAATTTTCAGTAAATAAAAGAAAAAGGTGGGTGG[G/A]TGTTGAAGAACAGCAATCTTTGGCGGCCGTAAACTGTGGTTATTGGATGATTTCGTTTTTTGTTAGATGAAAAATTGTAATTACTGTAATTTGATAATAT
Ro06-1647211	Ro06	1647211	C	T	TGCTCTGAGCTTTCATCAGAATGACTGCCTTGTGATGATTTGGAATGTAAGCGATTCCGCGACAGAGCAGCTTCTCTAACAGATCTCTTTAAATTCTGGA[C/T]ATAATGGCTATCACTATCTGCATACATGAAACTAAATATCAAAATCCTGCACGATTAAGCCGTTCCAACACCAATTCTGAATCCACGCATAAAATGAAGG
Ro06-1650103	Ro06	1650103	T	C	ATACGAAAAGCAAATTGCATTAACCCTGAAAACTCAATTAAGACTTTTACAAAGTTTGTGAAAAACTTCCATGGTATGTCTGATGACAAACCAACATGGG[T/C]ACACATGGTCATAATTTCAAAATGCCATCGGTAGTAAACATTATGCATGTTTCAAATTTTACGTGCAGCCTGTGCAGGTCAAGACTACCTTTGTGACGGG
Ro06-1669675	Ro06	1669675	C	T	ACTGACTTCTCCTCTACCACTTTACTATCTCTTTCTCATTCTCAGCATCAGAATCTCAATTTTACAAGTTCGCTGCGAAATTCGATCTTCTCAATCTGGT[C/T]CGTATTCCTATTCCTTTTACTTTCTCAGGTGCATGCAAGTCTTTCAATCCCTTATTCGATTTGATCGCGTTTCAGTAGCTTACACCATGCGTTTTAGTGT
Ro06-1679389	Ro06	1679389	G	T	CTGGTATAACAGACAAGCAGTTCGAAGAGTTAAAATTCTTGCTTGGTGCAGATAACCGTGTTCAGCTTAGAGCCCCAAAACCACGATATTTTCATGGTGG[G/T]CTATCATATCTCTCTTGTGATGATGATTGYGCCATCGACATTGAAGCATGCCCCAGGTGCCAGAGATTAAGTTTAGTTTATGATTGCCCAGTAGAGAGTT
Ro06-1679419	Ro06	1679419	C	T	TAAAATTCTTGCTTGGTGCAGATAACCGTGTTCAGCTTAGAGCCCCAAAACCACGATATTTTCATGGTGGKCTATCATATCTCTCTTGTGATGATGATTG[C/T]GCCATCGACATTGAAGCATGCCCCAGGTGCCAGAGATTAAGTTTAGTTTATGATTGCCCAGTAGAGAGTTGCCAAGGGAAACATCAGAAGGCTCAGATGT
Ro06-1685648	Ro06	1685648	T	C	ACTTTCGTGATTTTCTTACACGTCGTGGCTTGATCGGTTTACGAGATTTAAGAGAATTAAGTGGCTATAGACGCATTGATACTTTAGATGATCTTCAATC[T/C]GGTGCAATGTATCAGGGGGTGAGACTTCTGGGGGACTAGAAGATTTTGTATATTCCCTTTAGCTGTAATACAACTCATACAGTTGGMTTTTCTCCTTACC
Ro06-1685735	Ro06	1685735	A	C	ATGATCTTCAATCYGGTGCAATGTATCAGGGGGTGAGACTTCTGGGGGACTAGAAGATTTTGTATATTCCCTTTAGCTGTAATACAACTCATACAGTTGG[A/C]TTTTCTCCTTACCTTTTCTTTTTGCCCTACTAATCATAGACCACATGTAAAAAAATTGTTGATTCAAGTTGTAAGTGCCAAGTGGCAGCCATCTGAGTTA
Ro06-1701562	Ro06	1701562	T	G	TTTCGATATCATAAACTCCAGAGACCAGCAGGGTAACACAGCATTGCATGTAGCTGCTTCTAGGGGCCAATTAGCTGCAGTTGAAGTTCTTCTATCTGCA[T/G]CTCCTTCRTCGATTATTTCTAYGAAAAACAACTCTGGAGAAACGTTTCTCCACAAGGCTATCTCCGGTTTTCAAACTCCTGCATTCCGAAGATTGGACCG
Ro06-1701570	Ro06	1701570	A	G	TCATAAACTCCAGAGACCAGCAGGGTAACACAGCATTGCATGTAGCTGCTTCTAGGGGCCAATTAGCTGCAGTTGAAGTTCTTCTATCTGCAKCTCCTTC[A/G]TCGATTATTTCTAYGAAAAACAACTCTGGAGAAACGTTTCTCCACAAGGCTATCTCCGGTTTTCAAACTCCTGCATTCCGAAGATTGGACCGACAGATAC
Ro06-1701584	Ro06	1701584	T	C	GACCAGCAGGGTAACACAGCATTGCATGTAGCTGCTTCTAGGGGCCAATTAGCTGCAGTTGAAGTTCTTCTATCTGCAKCTCCTTCRTCGATTATTTCTA[T/C]GAAAAACAACTCTGGAGAAACGTTTCTCCACAAGGCTATCTCCGGTTTTCAAACTCCTGCATTCCGAAGATTGGACCGACAGATACAGCTCCTGAAGAAC
Ro06-1703756	Ro06	1703756	G	C	CCATCTCCAACACTTCAAACTGAGTCAAACAAGGCCGATAAATATCAATAAGATGCAAATGGCGCCCGTCACCAGACTCCCGAAAGTATCTACACATCCT[G/C]TCGTGAATGTTGTACTTCTTGTAAAAGTGAGGAGGATTATCAACAAAGCMATCACGCTCTTCATCTATGTGAAAGTATGATRCYTCGCTATACATGCCTA
Ro06-1703806	Ro06	1703806	C	A	AGATGCAAATGGCGCCCGTCACCAGACTCCCGAAAGTATCTACACATCCTSTCGTGAATGTTGTACTTCTTGTAAAAGTGAGGAGGATTATCAACAAAGC[C/A]ATCACGCTCTTCATCTATGTGAAAGTATGATRCYTCGCTATACATGCCTAACCAGTGAATTGCTCCATTCCAGTATAGCACACGTGCATAAGGGATGGTA
Ro06-1703838	Ro06	1703838	A	G	AAAGTATCTACACATCCTSTCGTGAATGTTGTACTTCTTGTAAAAGTGAGGAGGATTATCAACAAAGCMATCACGCTCTTCATCTATGTGAAAGTATGAT[A/G]CYTCGCTATACATGCCTAACCAGTGAATTGCTCCATTCCAGTATAGCACACGTGCATAAGGGATGGTACATACCCTAATGTAAGAAGAATCGAGAAGCCT
Ro06-1703840	Ro06	1703840	C	T	AGTATCTACACATCCTSTCGTGAATGTTGTACTTCTTGTAAAAGTGAGGAGGATTATCAACAAAGCMATCACGCTCTTCATCTATGTGAAAGTATGATRC[C/T]TCGCTATACATGCCTAACCAGTGAATTGCTCCATTCCAGTATAGCACACGTGCATAAGGGATGGTACATACCCTAATGTAAGAAGAATCGAGAAGCCTCC
Ro06-1713754	Ro06	1713754	G	T	TTTCTTACTTGTTTGAGGACCAACTAGTTAGGCTTTCGGTTTTCTCCTCCTATTCTTGCTTTCCCATTTTGTGTTATACTAAATCTGAAATGATAATATA[G/T]TTAGAACATCAATGGAGACCTTCGAAGGCCTTGATGTCTTCTGGTACAGCAACTTGTTTTCTACTTCAACTTTGATTTTCAATGGAATTGACTAATACGT
Ro06-1716750	Ro06	1716750	T	C	ACAAACCAAGGAAATTCGGCTTATCCTGGTGGTGCAACTATGTATGTTCAATTTGATTTATTTATACTTAAATGTTCTTAAGCATGTGTTTCATTTCCTT[T/C]TGATTAAATATATTTTGGGTTAATTAAGCTTATATTTTGACTTGTTAATTTCAGATCTGCATCTTCTTTGGTGTTCTTTTGATGGTTCTATCACCTATTG
Ro06-1717315	Ro06	1717315	A	G	GAACTTGTATGCATTTGATTTCTCAGATGTCATTCCGCTCTTCTCACATCTTTCGGGAAGGAAATAGAGTAGCTGATGCTTTGGCTAATTTTGGATCGTC[A/G]TCTGATAATTMTARTTTCACGTGGTRRGATTCTCMCMMTTCTTTTATTGTRTCTTTGTGTAATGAAGATCATTTAAGTCTTCGTCAGTTTCGTTTTTGTT
Ro06-1717326	Ro06	1717326	C	A	CATTTGATTTCTCAGATGTCATTCCGCTCTTCTCACATCTTTCGGGAAGGAAATAGAGTAGCTGATGCTTTGGCTAATTTTGGATCGTCRTCTGATAATT[C/A]TARTTTCACGTGGTRRGATTCTCMCMMTTCTTTTATTGTRTCTTTGTGTAATGAAGATCATTTAAGTCTTCGTCAGTTTCGTTTTTGTTAACTGGTCTGT
Ro06-1717329	Ro06	1717329	G	A	TTGATTTCTCAGATGTCATTCCGCTCTTCTCACATCTTTCGGGAAGGAAATAGAGTAGCTGATGCTTTGGCTAATTTTGGATCGTCRTCTGATAATTMTA[G/A]TTTCACGTGGTRRGATTCTCMCMMTTCTTTTATTGTRTCTTTGTGTAATGAAGATCATTTAAGTCTTCGTCAGTTTCGTTTTTGTTAACTGGTCTGTTAT
Ro06-1717341	Ro06	1717341	G	A	ATGTCATTCCGCTCTTCTCACATCTTTCGGGAAGGAAATAGAGTAGCTGATGCTTTGGCTAATTTTGGATCGTCRTCTGATAATTMTARTTTCACGTGGT[G/A]RGATTCTCMCMMTTCTTTTATTGTRTCTTTGTGTAATGAAGATCATTTAAGTCTTCGTCAGTTTCGTTTTTGTTAACTGGTCTGTTATCTATTTTTCGGG
Ro06-1717342	Ro06	1717342	G	A	TGTCATTCCGCTCTTCTCACATCTTTCGGGAAGGAAATAGAGTAGCTGATGCTTTGGCTAATTTTGGATCGTCRTCTGATAATTMTARTTTCACGTGGTR[G/A]GATTCTCMCMMTTCTTTTATTGTRTCTTTGTGTAATGAAGATCATTTAAGTCTTCGTCAGTTTCGTTTTTGTTAACTGGTCTGTTATCTATTTTTCGGGG
Ro06-1717350	Ro06	1717350	C	A	CGCTCTTCTCACATCTTTCGGGAAGGAAATAGAGTAGCTGATGCTTTGGCTAATTTTGGATCGTCRTCTGATAATTMTARTTTCACGTGGTRRGATTCTC[C/A]CMMTTCTTTTATTGTRTCTTTGTGTAATGAAGATCATTTAAGTCTTCGTCAGTTTCGTTTTTGTTAACTGGTCTGTTATCTATTTTTCGGGGAGATTTGG
Ro06-1717352	Ro06	1717352	C	A	CTCTTCTCACATCTTTCGGGAAGGAAATAGAGTAGCTGATGCTTTGGCTAATTTTGGATCGTCRTCTGATAATTMTARTTTCACGTGGTRRGATTCTCMC[C/A]MTTCTTTTATTGTRTCTTTGTGTAATGAAGATCATTTAAGTCTTCGTCAGTTTCGTTTTTGTTAACTGGTCTGTTATCTATTTTTCGGGGAGATTTGGAT
Ro06-1717353	Ro06	1717353	C	A	TCTTCTCACATCTTTCGGGAAGGAAATAGAGTAGCTGATGCTTTGGCTAATTTTGGATCGTCRTCTGATAATTMTARTTTCACGTGGTRRGATTCTCMCM[C/A]TTCTTTTATTGTRTCTTTGTGTAATGAAGATCATTTAAGTCTTCGTCAGTTTCGTTTTTGTTAACTGGTCTGTTATCTATTTTTCGGGGAGATTTGGATT
Ro06-1717366	Ro06	1717366	G	A	TTCGGGAAGGAAATAGAGTAGCTGATGCTTTGGCTAATTTTGGATCGTCRTCTGATAATTMTARTTTCACGTGGTRRGATTCTCMCMMTTCTTTTATTGT[G/A]TCTTTGTGTAATGAAGATCATTTAAGTCTTCGTCAGTTTCGTTTTTGTTAACTGGTCTGTTATCTATTTTTCGGGGAGATTTGGATTGGTCCCCCTCCCA
Ro06-1724025	Ro06	1724025	A	C	AACTCAAGCTCCAGACGACGATAGAACTTACAACCAGACCGAGGTTACTCTTTCTCTCTCTCTCTCTCTCTCTCTCTCTCTCTCTCTATTGGACATGTTT[A/C]AACATCTTTTCTTCTTCTTTAATTTGGATTACTCTCAAACCATGTGGATAATGATCTTGTATGAGATGGTTTCTTACTGGTTTGAGGACCAACTAGTTAG
Ro06-1726228	Ro06	1726228	A	T	GGATTCCTACTATATGTTTCCCAGTTATGTTATATGTGTGATTGATTAATATCTTGGATACTAATTGTGATGCATATGTGTGCAGTTACTCTACCATAGC[A/T]TGGACAACTTCWCTACACAAGGGTGTGRTAGAAGATGTTCAATATGGGTACAAAGCAAAGTCTTCTACAGGAACTTTTTTCAACTTCTTAGCTGCAYTGG
Ro06-1726240	Ro06	1726240	A	T	TATGTTTCCCAGTTATGTTATATGTGTGATTGATTAATATCTTGGATACTAATTGTGATGCATATGTGTGCAGTTACTCTACCATAGCWTGGACAACTTC[A/T]CTACACAAGGGTGTGRTAGAAGATGTTCAATATGGGTACAAAGCAAAGTCTTCTACAGGAACTTTTTTCAACTTCTTAGCTGCAYTGGGTGAAGTGGCTT
Ro06-1726256	Ro06	1726256	G	A	GTTATATGTGTGATTGATTAATATCTTGGATACTAATTGTGATGCATATGTGTGCAGTTACTCTACCATAGCWTGGACAACTTCWCTACACAAGGGTGTG[G/A]TAGAAGATGTTCAATATGGGTACAAAGCAAAGTCTTCTACAGGAACTTTTTTCAACTTCTTAGCTGCAYTGGGTGAAGTGGCTTTTGCCTATGCTGGCCA
Ro06-1726325	Ro06	1726325	T	C	AGCWTGGACAACTTCWCTACACAAGGGTGTGRTAGAAGATGTTCAATATGGGTACAAAGCAAAGTCTTCTACAGGAACTTTTTTCAACTTCTTAGCTGCA[T/C]TGGGTGAAGTGGCTTTTGCCTATGCTGGCCACAATGTGGTCCTTGAGATACAAGCAACAATTCCTTCTACACCTGAGAAGCCTTCCAAGGGACCAATGTG
Ro06-1727251	Ro06	1727251	G	C	TGGTGGTGTAACTATGTATGATGTTCAGTTTGGTTAATTTATACTTAATTGTTCTTAAGCATGTGTTTCATTTCCTTTTGATTACATATATTTGAGTTAA[G/C]CTTACATTCTGACTTTTTAATTTCAGATTTGCATCTTCTTTGGTGTTCTTTTGATGGTTCTATCACCTATTGGAGGTCTGAGGTCAATCATAGTTCAGGC
Ro06-1731884	Ro06	1731884	C	T	TCAACATATAACTTCTCATTCTCTACATTCTCAAAAAAAAAAATTTCTCATTCTCTATAGAGTACATATAACTTCTTATTTTCTGCAAATAATTTTCTAT[C/T]TTTTTTCATTCTCTAATTTTTTTTCCCTTTTCTCAAGAAAAAACTCCTTACACATGCATATCATGCGGCCGTGCACTGAGATCCTGCTTGGCTCGTTTTG
Ro06-1739495	Ro06	1739495	C	T	CACACGCATATAAACGTGCATAAGCCTGCGACTTTTCTTTGAGTAGATCTCCTGAAGATTTGGTACAAGCTGGAAAGGTGTAGCATGCAACTGGCCTAGG[C/T]AGACATAACAAAGKTCAAGATCACCTCTCTTAAATCTGTATTTAACATATATAGAAAGGAAAAAGAATGTAAAAGATGCCTGAAGTATGAACTTTATAAG
Ro06-1739509	Ro06	1739509	T	G	CGTGCATAAGCCTGCGACTTTTCTTTGAGTAGATCTCCTGAAGATTTGGTACAAGCTGGAAAGGTGTAGCATGCAACTGGCCTAGGYAGACATAACAAAG[T/G]TCAAGATCACCTCTCTTAAATCTGTATTTAACATATATAGAAAGGAAAAAGAATGTAAAAGATGCCTGAAGTATGAACTTTATAAGAAGGAAATAGAGAC
Ro06-1772573	Ro06	1772573	T	C	TGGTTATTGTGGAATACAATATCACGATAGCCATGACGTTGATAGCCTAAATGATTCCATGTGCTGTCTCCATGCTTACAAAATGCTAATCCGTGTTCTT[T/C]AAATGAAAATCCTAATCGGTACATTACCACAATGAAGAAGTTGTTGTTGTGAGACGGGTCAGCGGAGATGAGAGCTTTAACAATGCTCTCGCTACAGAAT
Ro06-1777745	Ro06	1777745	T	C	TCTACTCCTCCCATCACCGCTGTCGGATCTGACATCTCATCACCTCTCATGTAATTGTCTCTTCCGATTTTACTGAGGCTCAACCACTGCTGACTGTGAC[T/C]RACCGCAGGATTAWTCTCATAACTAGATCCGCCGTCCTTGGAGTGGTCGTTCTCGCTACTCTTGTCGATCTCAGGCAAGAGCTGCAGTGTCACCACACCC
Ro06-1777746	Ro06	1777746	G	A	CTACTCCTCCCATCACCGCTGTCGGATCTGACATCTCATCACCTCTCATGTAATTGTCTCTTCCGATTTTACTGAGGCTCAACCACTGCTGACTGTGACY[G/A]ACCGCAGGATTAWTCTCATAACTAGATCCGCCGTCCTTGGAGTGGTCGTTCTCGCTACTCTTGTCGATCTCAGGCAAGAGCTGCAGTGTCACCACACCCT
Ro06-1777759	Ro06	1777759	T	A	CACCGCTGTCGGATCTGACATCTCATCACCTCTCATGTAATTGTCTCTTCCGATTTTACTGAGGCTCAACCACTGCTGACTGTGACYRACCGCAGGATTA[T/A]TCTCATAACTAGATCCGCCGTCCTTGGAGTGGTCGTTCTCGCTACTCTTGTCGATCTCAGGCAAGAGCTGCAGTGTCACCACACCCTTATTATTATTATT
Ro06-1780216	Ro06	1780216	T	A	GCATCCGTTCTCACAGCCCAACTGGTCATAGGGTTCATGTTCATCCTGGTAGGTAGCATGTGGTCCCGAATGTCCTGGTTTTTCTCAACCGTGTGGTCAA[T/A]ACTTAACCAAGATCTAGTACCTGGAAATTCGCCAGAGCCTGTTTCTTCGGGCATGAGCTGAAGCGTGATTGAGGTCGAGTCCATACCAGCTTCTGGATCT
Ro06-1795285	Ro06	1795285	T	G	TGGCTATATCTTGGAGGGAGAGAGTCAAGTATGTCTGAGTCAGTCTCTGAATGTTTCGCTTATACATGGAAGATATAGCCTGCTTCACCAGTCCAAGATT[T/G]TTGTCCTAGGGGAAAAGCACAATTTGAATGCCTCATTAAGATGGCTCGAGGATTCAAATGAAAGACTTGTAAGCTACACAGGGAATCATATGAATTCCAC
Ro06-1800897	Ro06	1800897	T	C	TCCTGCATATTATGAGTGTTTGTGTTTTCCTGAATTAAGTATGCATGATTAGCATTCTCTTTGGACTTGGCCTTTTATTGAAATTATCAACTTTTTTTTC[T/C]WATKRATTTTTCTGACATACTAGGTGTGGCATTAGTTCTCTGCCAATCAGATCCTGTACTTAATGATGGGCAGTGTGCTAATGGTCGATCGAGGGAAGCT
Ro06-1800898	Ro06	1800898	A	T	CCTGCATATTATGAGTGTTTGTGTTTTCCTGAATTAAGTATGCATGATTAGCATTCTCTTTGGACTTGGCCTTTTATTGAAATTATCAACTTTTTTTTCY[A/T]ATKRATTTTTCTGACATACTAGGTGTGGCATTAGTTCTCTGCCAATCAGATCCTGTACTTAATGATGGGCAGTGTGCTAATGGTCGATCGAGGGAAGCTG
Ro06-1800901	Ro06	1800901	G	T	GCATATTATGAGTGTTTGTGTTTTCCTGAATTAAGTATGCATGATTAGCATTCTCTTTGGACTTGGCCTTTTATTGAAATTATCAACTTTTTTTTCYWAT[G/T]RATTTTTCTGACATACTAGGTGTGGCATTAGTTCTCTGCCAATCAGATCCTGTACTTAATGATGGGCAGTGTGCTAATGGTCGATCGAGGGAAGCTGTGA
Ro06-1800902	Ro06	1800902	A	G	CATATTATGAGTGTTTGTGTTTTCCTGAATTAAGTATGCATGATTAGCATTCTCTTTGGACTTGGCCTTTTATTGAAATTATCAACTTTTTTTTCYWATK[A/G]ATTTTTCTGACATACTAGGTGTGGCATTAGTTCTCTGCCAATCAGATCCTGTACTTAATGATGGGCAGTGTGCTAATGGTCGATCGAGGGAAGCTGTGAT
Ro06-1815253	Ro06	1815253	G	A	AATAAATGCATATGACAAACTTATTAATTACGTGTGAAGTAATGTAAGGGGTAAAAAAGATCTGAGTTTGGTTCGGTTTTTTGCAAATACGCTTAGAATC[G/A]CAAACTGAATATTTGTTCAACTGATTTGATACGACTTCTTACACCGATATKTTTAAAATGCGTTAAAAAATGTACCACATGCACCAAGGGGTCTACGGTT
Ro06-1815304	Ro06	1815304	T	G	TAAAAAAGATCTGAGTTTGGTTCGGTTTTTTGCAAATACGCTTAGAATCRCAAACTGAATATTTGTTCAACTGATTTGATACGACTTCTTACACCGATAT[T/G]TTTAAAATGCGTTAAAAAATGTACCACATGCACCAAGGGGTCTACGGTTCAAATGTCCATCCCTAAAGTAGCTTTATAAAAATAAAAACTCCGATCAATC
Ro06-1815905	Ro06	1815905	A	G	ATTATTGTCCTTCCACGTTTAGCATGCACAGCCAATGAAGTCACTATACACCATTTATGTGTTTGGTCAGGCACATCACACATGCTTATATCAAACTCAT[A/G]AGTGTATCAACTACTCCCTCGAGACAGAGACATGTCGAGGAAGCAACATAATGATGATATTTTTACAATTGGATGGTAAAGTAATTTCGATAAYTGAATT
Ro06-1815999	Ro06	1815999	T	C	ACTCATRAGTGTATCAACTACTCCCTCGAGACAGAGACATGTCGAGGAAGCAACATAATGATGATATTTTTACAATTGGATGGTAAAGTAATTTCGATAA[T/C]TGAATTATTATTATATGATAGAGATGCATGGATTATTTTTTTCGATGAAGAAGATGCATGGATGATTGAGACCTGAAAAATGCAAATCTATAATACGACA
Ro06-1818384	Ro06	1818384	G	A	TGATTTCATTGGGGTGAACTACTACACTTCCAATTTCGCGGCTGATGTACCAAAAACGAACAATGATGTCTACACCGCGTATAGTGATTACCAGCATGCT[G/A]CCCTCTCATGTAATTAATACTCACTTAATTAGTTACTCGCTAATACTACTTTCTTAAGAAAGAAAGAACAGATCGAGATAATTAACGATTACTGTAAAAT
Ro06-1818616	Ro06	1818616	T	C	TGCAGCGACAGGATCAGATGGGGAGCTCATAGGCCCTGCAGTAAGATCATTTTGGGCACTAATTATTTTGTTAATTACACTAGTTAGAATGCCAAACATG[T/C]TTTACTTACTTTAGTTTTATTTGGTAATTAGACACCAGGAAGCAGTCAGATCTTTGTGTATCCAGAAGGACTAACGAAGTCATTGATTTTACTGAAGAAT
Ro06-1860423	Ro06	1860423	A	T	TAAGAATGAGTGTGACTTACCATATCTGAGGGAAATTGTCCTGCAGTCCCCTTTGCACAATCTGTTTCATATCATGCTGAACTATTAAAATTATTATCAA[A/T]TAAATAAAAGAAAAGAATATTCAAGACCACAAATTAAATACCTTTAAGCGTGATAGCTTCATAGGATACTACATTTCCTCTGGAAAGCAAGGGATAATTA
Ro06-1881431	Ro06	1881431	C	T	GTTCCTTGACCACATATTATTCAATGCAAGAAAATGGGTGAATATAGTTGACCCATACTTATTGATTAAATAGCGATCTAGCTAGCTAGAACAAACATAA[C/T]ATGATAATATGATATATATATATATGCCAATAAATTATGAGATCGACAACGAGTACGTACTGACTACTGAGAGAGTAAATTAAATAATTAATGGACCTAG
Ro06-1885934	Ro06	1885934	C	T	TCAACCTTTTTTCCACCACCTAAACCTAGACCTTTGAACGGTTGAGTAATGTGCTGTTGCTTCGAACTTAGTTTGTTATAATGGCGACGCATGTTTGTAT[C/T]AGTATACTGATTTAGATTGATTGTTGTATACTGTTACAGCCAATTTCACAGAACAAACGTTATGTTGCAAGGAATGGGTTGCCTGTCCTGGTATGCTTTC
Ro06-1888958	Ro06	1888958	C	G	AAATTCAGCACGTATGCATTTCATATCACTTTTCCTTTCCACTTCCTGATTGGAAGTTTGGAACAGCGCTAAGCCTGACAAAGGAGTTTTTGAACAAAAG[C/G]TTGTCTTAGTAATATATGTTTTGCTGTCTATATTGCAGGTGACTTATATGCCACTATCAGTGCTGATAACCAGCTTCAAGAAGGAAAATGTTCAGAGACC
Ro06-1919521	Ro06	1919521	C	A	CAGTTACTTAGGGGAATGGTTAGTTGTTGACATGCAAGTTCTGTTTCTTCAATTTGTTATTCTGATGCTTCAGACTCTTCAAGTTGGTCTCCTCGCATAT[C/A]TGTTACTTTTTAGTTTTCCTGATGAAACTTCACTTCCGATTAGTTCTCCTAATTCACTTGTACCGACTGAGAAAAGAACCACATGTGGCCCTGGACAAAA
Ro06-1923345	Ro06	1923345	C	G	ATAAGCAAGTAAAGACTTGGATTCTGGTGTGCAATCTCACTTCTCTCAATTGTTTATCAACACCACTGAAAAAGTAGAGGATGTATGTAATCATTTTTCT[C/G]TTACTAGGCTGGTGGTGGATKCCAAATGAAAACATTTTGCAGATCGCATATTAGATAATCCGGTGGTTGCTACTTGCTAGTGGTGCATGTGCCTTAAAAT
Ro06-1923366	Ro06	1923366	G	T	TTCTGGTGTGCAATCTCACTTCTCTCAATTGTTTATCAACACCACTGAAAAAGTAGAGGATGTATGTAATCATTTTTCTSTTACTAGGCTGGTGGTGGAT[G/T]CCAAATGAAAACATTTTGCAGATCGCATATTAGATAATCCGGTGGTTGCTACTTGCTAGTGGTGCATGTGCCTTAAAATTTGACAGACGAGGAGAAACAT
Ro06-1932369	Ro06	1932369	A	G	TTAGATCACTCTCCTCTTTGTTTGTAAAGAAAACACAAATACTGCGCTTGCAGTTAAATTTTCTGTGTATCACATGCTTGATGTAAGGAAATGGTGAATG[A/G]AGCCTTTTCTTMACTCAGATTTCCCGRGATTATATCAGRGATAGGTGAAAGTCAATGTTCTATGCTTTAAGGAAGCTTAGGACTATACAGATGTGTCCAG
Ro06-1932381	Ro06	1932381	A	C	CCTCTTTGTTTGTAAAGAAAACACAAATACTGCGCTTGCAGTTAAATTTTCTGTGTATCACATGCTTGATGTAAGGAAATGGTGAATGRAGCCTTTTCTT[A/C]ACTCAGATTTCCCGRGATTATATCAGRGATAGGTGAAAGTCAATGTTCTATGCTTTAAGGAAGCTTAGGACTATACAGATGTGTCCAGTAGTTTCTCATC
Ro06-1932396	Ro06	1932396	G	A	AGAAAACACAAATACTGCGCTTGCAGTTAAATTTTCTGTGTATCACATGCTTGATGTAAGGAAATGGTGAATGRAGCCTTTTCTTMACTCAGATTTCCCG[G/A]GATTATATCAGRGATAGGTGAAAGTCAATGTTCTATGCTTTAAGGAAGCTTAGGACTATACAGATGTGTCCAGTAGTTTCTCATCAGATCGTATTTAATA
Ro06-1932408	Ro06	1932408	G	A	TACTGCGCTTGCAGTTAAATTTTCTGTGTATCACATGCTTGATGTAAGGAAATGGTGAATGRAGCCTTTTCTTMACTCAGATTTCCCGRGATTATATCAG[G/A]GATAGGTGAAAGTCAATGTTCTATGCTTTAAGGAAGCTTAGGACTATACAGATGTGTCCAGTAGTTTCTCATCAGATCGTATTTAATATAGATGACTTAT
Ro06-1947944	Ro06	1947944	C	A	TGTAGAATTGTGATGAATCCTAATTTAGCTTGCTGTTCTGGGTGCTTTGGAAGATAATAAAGATTTTGTTGATCCTTTATATATGTTGGTCTTTTGTTTA[C/A]GTATGCCAACAATGTTTCCTTGTTTGATATGTTAGTGGTGAGAGCATGGAAAATGCATTACGTGCATGTTGCAAAGGAATAAAAATTGGAAAGATCCTGA
Ro06-1987638	Ro06	1987638	C	T	AAAGAACCTTCTAGATAGCCTGCTTATCTAGGACATGACTCGTAATTGCATCCACCACAAAAATTTGCTTCATGATTTTAATGTGTTTGTGAAGTTGATT[C/T]GCGAGATTCAAATAATAATGGCCGATAATGTATAATTCAATRCAAAATAAAAAAAATAATAATAATWATTAAATTTAAAACACATGCATCTTTGAAATAA
Ro06-1987680	Ro06	1987680	A	G	TAATTGCATCCACCACAAAAATTTGCTTCATGATTTTAATGTGTTTGTGAAGTTGATTYGCGAGATTCAAATAATAATGGCCGATAATGTATAATTCAAT[A/G]CAAAATAAAAAAAATAATAATAATWATTAAATTTAAAACACATGCATCTTTGAAATAAATTCCATGTACCAAACAAAAAGCGAAATCCCAATCGATTTAT
Ro06-1987705	Ro06	1987705	A	T	CTTCATGATTTTAATGTGTTTGTGAAGTTGATTYGCGAGATTCAAATAATAATGGCCGATAATGTATAATTCAATRCAAAATAAAAAAAATAATAATAAT[A/T]ATTAAATTTAAAACACATGCATCTTTGAAATAAATTCCATGTACCAAACAAAAAGCGAAATCCCAATCGATTTATACTTGTATAATGAGTATCTAAAGGC
Ro06-2012768	Ro06	2012768	C	G	TGTAGCGCCTTTTAAGACTTGCAGGAATTTTTCCACCATAGTACATATGATTCCCCTATCTATTGTTCAGACAGCAAAATGCATGTTATAGGAAAACGCA[C/G]ATTCTATCCATTGCCTACCAAAATGACTTAAGTAAATWATCATGAGTGTTAAGGTCAACATGGTGTTCTCAGAATCAGGCAAACTAATCATAATTTCTCT
Ro06-2012806	Ro06	2012806	T	A	TAGTACATATGATTCCCCTATCTATTGTTCAGACAGCAAAATGCATGTTATAGGAAAACGCASATTCTATCCATTGCCTACCAAAATGACTTAAGTAAAT[T/A]ATCATGAGTGTTAAGGTCAACATGGTGTTCTCAGAATCAGGCAAACTAATCATAATTTCTCTAGTAGATGTACTTTCTGATGAAGTCTACAATAAGACCT
Ro06-2030678	Ro06	2030678	A	G	TTGCTGTCGGAATTGTTGCTTGGGCAGGATTTGGAAAACCTAATGTGCCTCCCCCACCTCCGCAGTGAGCATAGCATTTGGTTGGTCATAATCTTTGGCA[A/G]TCTGGAAGGCGCTTTGRAGATTTACCAYTCATCACCACATAGAGCTGCATGTGAAATTGATCCACAAGTCAACTTTTACTTAGAAATGTTCGCCAATGTA
Ro06-2030695	Ro06	2030695	G	A	GCTTGGGCAGGATTTGGAAAACCTAATGTGCCTCCCCCACCTCCGCAGTGAGCATAGCATTTGGTTGGTCATAATCTTTGGCARTCTGGAAGGCGCTTTG[G/A]AGATTTACCAYTCATCACCACATAGAGCTGCATGTGAAATTGATCCACAAGTCAACTTTTACTTAGAAATGTTCGCCAATGTAACTCATACATAACTGTA
Ro06-2030706	Ro06	2030706	T	C	ATTTGGAAAACCTAATGTGCCTCCCCCACCTCCGCAGTGAGCATAGCATTTGGTTGGTCATAATCTTTGGCARTCTGGAAGGCGCTTTGRAGATTTACCA[T/C]TCATCACCACATAGAGCTGCATGTGAAATTGATCCACAAGTCAACTTTTACTTAGAAATGTTCGCCAATGTAACTCATACATAACTGTATGGTTTTTTCT
Ro06-2032211	Ro06	2032211	C	T	GCTTCCTTTACTCAATCACTTTAATATGCTTGATTAAACCTGTTAGTTACAATTTCTGTAATACTTTGGATTGCCCGAGTGGCGTTTTGATTTATGCTCT[C/T]TTAACATGTGGCTTTGTCACTGACTTACTGGTGCAGCCCCTCACCATTTTATGTCACACCTTCCACGACATTGACCGATTTACAACAGGCTTCCCTCGTG
Ro06-2040760	Ro06	2040760	T	C	AATCTCGGAACCACATGCTCCCGGAAAATCAACGAGTAATCGCTGCTGTTCCTCATGTAATCTTCAACGGCGTCGTCCACTGGTGCGAAGACCGTCAGCG[T/C]CGTCTTCCGATTGAACCCAATCAGTTGCGCATCAAGAAATGCGGCCATGATCGAACAGCCTTTCGACCTCAGCAGATCCGCAACCGACCCGAAAGATTCA
Ro06-2064040	Ro06	2064040	C	G	GAGATCCTATATACAACCCTTCCTTGACTTCACATATACACCATTAATTGATGGCAATTGACATTCAACAATTATGGTAACATTATCTTAATTTCCCACA[C/G]GCTATTACAAGTTGCAAATATGAACAAAATATATATTTGAATAWCGCCATAGACTTGTGCTTGGCGTTTGGTGATGGGATAAAATAATTAAGGGATTTGT
Ro06-2064084	Ro06	2064084	A	T	TAATTGATGGCAATTGACATTCAACAATTATGGTAACATTATCTTAATTTCCCACASGCTATTACAAGTTGCAAATATGAACAAAATATATATTTGAATA[A/T]CGCCATAGACTTGTGCTTGGCGTTTGGTGATGGGATAAAATAATTAAGGGATTTGTTACTTGGTCGTTTTCATGTCAAACTCAGCATGTAATGACCAAGG
Ro06-2080042	Ro06	2080042	G	A	CTTGTTGCTTGACAACGATTTCTTTGGCTTCCAACTTGCTTGCTTGAGGCATCTCCAAATCTGCTTTATCATCGACAATCATACGTTGCCACTCATAACT[G/A]ACCACATGTTGATCATTGTTCTCAAAAATATCTTCTCCATACCTGCCTAAGCATTCGATGAACGGATCAACTTCTGCATCTTCAATTTTCTTTTCAATTG
Ro06-2085618	Ro06	2085618	T	C	CCAATTGCAAAAAGTGTTAAGGGCGTTGGAAGAAGTTAAAAACTGTATTCAACAAATTGTTTTAAAAAGATAAAACAAAGTGTTTGATCTATTGTTGTTA[T/C]GAAGAGGTGAAGAGCAATAATGATAACTACACAAACAAAGTAAGCTAGTGAGGAATAAACTAATGTACGATAATATAAAGATGGATTCATGGGAGACATA
Ro06-2088629	Ro06	2088629	A	G	GATAGCTCTAGCTAAAATGGTTCATGCTCTATCAACGGTACTTGACGAGCTAGCTCCAATACCTCTGATATATTCTACAAACATAGCAGCAGAGACAGCC[A/G]ATCATATATAATATATGGAAATTAAGCTAGCTGTTTAGCTAATTAATTAGGTTGATAGATATTGCAAATTTTAGAATTTAACCAAGATTTTATGCACATG
Ro06-2123038	Ro06	2123038	T	G	GCTGGATTCTAGGTTTGCCAGAGAGATTAACCTGGAAACAGCACATGCTTTTGAGTTTATCCGTATATAATCCACACTAACCCGGACGGATTACTTTCAT[T/G]CTAAGTTTGCCTCGTACAATTAAATTTGTATCAGTGCCAGTGTCACATCCTTTGTGTGTGCTGAAGCTGTAAAACACCATTGCATCTCTCACCAGTGAGG
Ro06-2146656	Ro06	2146656	C	T	TTTATTCAGGAAACTTCTTCTTCTTGGTAGTTGGTATGAGAAAGAAAGCCAGAAGCTTCATCTGATTTGACTCTTGTTCTTGCAGAGTTGTGATTGACAA[C/T]GATTCGTGTGAGGATGCAACTGTTATCCAGGTGAGTCTTTTGTAAATTAATGTTTGCTTAATGCTTATCAGACGACTCTGTTGAATACAAATCATATAAA
Ro06-2150864	Ro06	2150864	G	T	AAGATCTATTGAGGCCTGCTAAAAGGCTGTGGGATGAGATGTTTGCAAATGGGTGCAGAGGAAATTTGAAGACTTACACTATCTTAATTCGGAAATTTTC[G/T]AAAGTAGGCCAAGTTGATGAGGCTCTAAGGCTCTTTTACCACATGCTGGGTAGAGAAGTTACTCCTGACGTGGTGACTTACACATATCTACTTGAAGGGC
Ro06-2156388	Ro06	2156388	A	G	CAAGTTTCAAGCTAAAGAAAAACAGAATGATAAGGTTCAACTAATTTTCCTTACCATTTAATACATGTGTCTGTGGCCCACAAATAGTTGAGACCTCAGC[A/G]CCGGTAACTGAAAAAGAATTGTTCGTAGATGGGGCCTTTTCTTCAGTATTTGCTGAAATATTTTGTTCCTCCTTTCTTAAAGTGGCATTACTAATTCCTG
Ro06-2191215	Ro06	2191215	A	C	CAACCATTCACTGCTTTTCTTTTGTTTGGTCTCGATATGCTCATGTTAGTTAGATTTAAGTATTCATATTCAACATGAAAATCCTTTGTTCAAATGTTGG[A/C]ATTAGACGAGCTTTACCACTGATTCTTCCACTCTGAAAACGGCTTTGTTGTTACTTGTTAATTTGAGGCATGTGGCAAGCAGATTGTTTTGTAATGTTGA
Ro06-2196964	Ro06	2196964	A	G	AAAGAAGAATGAAAAGGACTTGAAGAAATGGATAATGACAAAGAGGAAACGAGGCTTTACATGCCTCTCTCGTTAGACTTTTTGAGCTAAATTGGTTTAA[A/G]ATTTGGGTAGCTAGAGGCCTAAGGAACGTATGTACAAAAAAGATATTAGTTAGAACCGTGCTATAATAAATCTTTTTTGTAATTTCACCATAAGTTGAGT
Ro06-2200977	Ro06	2200977	C	G	AATCCATGATAAACTCCCTAAAGGTTATCATGGATTTAGGGGGTTTATCATGGATTTCGATTTTCTTTGGGTAATCTTCGTTGGTTAGTGGTATGTATAT[C/G]TAATCCTTGTCAATTAATTAATAGGTAAAAACAAAAGGGCATGCAGAAATCAATTGAATCAAAGTTGAAACCAAATGGGCAGGGGTTAATCATAACTAGG
Ro06-2201544	Ro06	2201544	T	C	ACAGACGCGTTTCAAGGTTTTTTCTTGAATATGGAGGAATTGGGGTTTCCATCAAATAGCTCATCAATGTACGTCTCTATATCTTCTGGCTGAAATTTTA[T/C]GTACTTCTCTGTTTGCCTTCCCGCGTCGAACACCTGCGCGAATCTCCCCAAGAAGGACCGATAGGCCGGAATGACCACCGCCGATATGGAAACCCTGAGC
Ro06-2201671	Ro06	2201671	C	G	CGAACACCTGCGCGAATCTCCCCAAGAAGGACCGATAGGCCGGAATGACCACCGCCGATATGGAAACCCTGAGCTCCGACTGAAGCTGCTCGTCACTGAC[C/G]ACCCACATGCTCTGCGTCTTGTGAATCTCATCGAACATAGCGTTGAAGCTCTTGAACCTCTCTTTCAGCACCGGCTTCATCACTTTTCCGTGGGAGCTCA
Ro06-2247570	Ro06	2247570	T	G	AGGAAACAAGTGCATGGTTGTTCAAGGGTTAATCGAAACAAGAATAGTGCTCTTCGTTATGCTCTGCATCTCCGTTTCATATGCCCTTCTCCTAAAAAAG[T/G]TTCTAGGTCAGTTCAGAGATGCAAATCAGATCCCCTATCTGCACCACAAAGAACAAGCTTAGACGTGGAAGGGGAGCGGAGATTCTACCTCTACAATGAC
Ro06-2265225	Ro06	2265225	T	A	GCTCAATTGTTCACAGGCCAATCTCCTTTTAACTGATAAAGTGGCCTTCTGACAGTCAACAGCTAAACCCAGCTGAATTTCGGTTCCCTGAGATAAGTGT[T/A]CGTCAATATCAGTATCGATCTGTAAGGCCCTGTAAATTAATATCTCCAACGTACTCACCCAAGTACGATATATATATTCTAGCTGTAACAGAGAAATGCA
Ro06-2267491	Ro06	2267491	T	A	TACTTATACTGGCATGCAATTAAATTATGCATAACAAAATCTGTACCAAAACAAAATTATACATAAGCATTGCAAAAATTAACTTTAATTTGTTTTTTCA[T/A]WTTTTTATTGGCACCCCATGCCATGTGAATGGACTAGTGTGTACGTACGTACCAATTGTTTGTTGGTTTTGTTCGAAATTAGCACAAGGAGATCGAGATT
Ro06-2267492	Ro06	2267492	A	T	ACTTATACTGGCATGCAATTAAATTATGCATAACAAAATCTGTACCAAAACAAAATTATACATAAGCATTGCAAAAATTAACTTTAATTTGTTTTTTCAW[A/T]TTTTTATTGGCACCCCATGCCATGTGAATGGACTAGTGTGTACGTACGTACCAATTGTTTGTTGGTTTTGTTCGAAATTAGCACAAGGAGATCGAGATTG
Ro06-2271869	Ro06	2271869	T	G	CATGAGAGTTTTCAATCTGCTTTCAGTGCTACATAACAATTTGGATATTCTTTTGCATCATCGTTGTGAATAAAGGTCTGGTTGCAAAAGGAGAAACTGT[T/G]TAGTTTATGTTCAAATCTCTGTATTGTGAACTGCGTTATATGTTAMATATATTGAATGGGACATGACTGAATGTTGGAATCAGTTGATGCATGCAACAAA
Ro06-2271915	Ro06	2271915	C	A	ATTCTTTTGCATCATCGTTGTGAATAAAGGTCTGGTTGCAAAAGGAGAAACTGTKTAGTTTATGTTCAAATCTCTGTATTGTGAACTGCGTTATATGTTA[C/A]ATATATTGAATGGGACATGACTGAATGTTGGAATCAGTTGATGCATGCAACAAAAATTGGTTAAGTTGAGGCAAGATTAATTATTGAAGGAATTTTTTTA
Ro06-2273587	Ro06	2273587	A	C	GTTGCTACTCCATCCAAATCTGGTGCTGCAAAAGGAAGCAAGAAGAAGCGCTAAACATTGGAGATGTAAATTCAATGAGATAGCATATGAGCAATTGGTT[A/C]TSGCTTRTTGCTAACGCATGTCCCTGTGTTGCGAGTTGTTTTTTTCCCTCCGAGTTAGTGGCACATGTTAGTTGTCCGAAACTTCCAAATGAATAGTTTA
Ro06-2273589	Ro06	2273589	G	C	TGCTACTCCATCCAAATCTGGTGCTGCAAAAGGAAGCAAGAAGAAGCGCTAAACATTGGAGATGTAAATTCAATGAGATAGCATATGAGCAATTGGTTMT[G/C]GCTTRTTGCTAACGCATGTCCCTGTGTTGCGAGTTGTTTTTTTCCCTCCGAGTTAGTGGCACATGTTAGTTGTCCGAAACTTCCAAATGAATAGTTTATT
Ro06-2273594	Ro06	2273594	G	A	CTCCATCCAAATCTGGTGCTGCAAAAGGAAGCAAGAAGAAGCGCTAAACATTGGAGATGTAAATTCAATGAGATAGCATATGAGCAATTGGTTMTSGCTT[G/A]TTGCTAACGCATGTCCCTGTGTTGCGAGTTGTTTTTTTCCCTCCGAGTTAGTGGCACATGTTAGTTGTCCGAAACTTCCAAATGAATAGTTTATTAACAA
Ro06-2274533	Ro06	2274533	A	C	CTCCAATTCAAACTGCAGCCAGTACATAATTACTGTTCTTGGTCTAGCTTCATATATAGTGTGGTATGAATTTAGGAATGGATCGCTTTGGGTCTTGCTT[A/C]AAGGCAGCTTCATATATAATACAAGTAAAAACAGAACATTAATYGACRAAGARTCGGCCATTTGTGTCGTGTAATTGGGAWAGGCCAKGATAGAACAGTA
Ro06-2274577	Ro06	2274577	C	T	TAGCTTCATATATAGTGTGGTATGAATTTAGGAATGGATCGCTTTGGGTCTTGCTTMAAGGCAGCTTCATATATAATACAAGTAAAAACAGAACATTAAT[C/T]GACRAAGARTCGGCCATTTGTGTCGTGTAATTGGGAWAGGCCAKGATAGAACAGTAACACTAGCATGCATAGACAAGTTTCTTGGCAAAAAGGAAAACAT
Ro06-2274581	Ro06	2274581	A	G	TTCATATATAGTGTGGTATGAATTTAGGAATGGATCGCTTTGGGTCTTGCTTMAAGGCAGCTTCATATATAATACAAGTAAAAACAGAACATTAATYGAC[A/G]AAGARTCGGCCATTTGTGTCGTGTAATTGGGAWAGGCCAKGATAGAACAGTAACACTAGCATGCATAGACAAGTTTCTTGGCAAAAAGGAAAACATGCAG
Ro06-2274586	Ro06	2274586	G	A	ATATAGTGTGGTATGAATTTAGGAATGGATCGCTTTGGGTCTTGCTTMAAGGCAGCTTCATATATAATACAAGTAAAAACAGAACATTAATYGACRAAGA[G/A]TCGGCCATTTGTGTCGTGTAATTGGGAWAGGCCAKGATAGAACAGTAACACTAGCATGCATAGACAAGTTTCTTGGCAAAAAGGAAAACATGCAGCTAGA
Ro06-2274614	Ro06	2274614	T	A	ATCGCTTTGGGTCTTGCTTMAAGGCAGCTTCATATATAATACAAGTAAAAACAGAACATTAATYGACRAAGARTCGGCCATTTGTGTCGTGTAATTGGGA[T/A]AGGCCAKGATAGAACAGTAACACTAGCATGCATAGACAAGTTTCTTGGCAAAAAGGAAAACATGCAGCTAGAGCCGTATATATAGCACAAAATGAAACTC
Ro06-2274621	Ro06	2274621	T	G	TGGGTCTTGCTTMAAGGCAGCTTCATATATAATACAAGTAAAAACAGAACATTAATYGACRAAGARTCGGCCATTTGTGTCGTGTAATTGGGAWAGGCCA[T/G]GATAGAACAGTAACACTAGCATGCATAGACAAGTTTCTTGGCAAAAAGGAAAACATGCAGCTAGAGCCGTATATATAGCACAAAATGAAACTCAGAAATA
Ro06-2279187	Ro06	2279187	T	A	ATCCGTTCAACACATAAAGCATACCTTTGTCGCTGTCCCCAGCGAATGCAATAGAAAGCATTTCAAGCTGCTCAGCATACATCCCAATGTAGAGGAAAAC[T/A]TGGTCGGTCAAAAGGCCAKWGAGAGACAACCGCCTAAGCTTTTTGCATGCCTGAACAATTGCCCCAAAACCTTCATCTAGTGGCTGCATGGTTACAGGAT
Ro06-2279206	Ro06	2279206	G	T	CATACCTTTGTCGCTGTCCCCAGCGAATGCAATAGAAAGCATTTCAAGCTGCTCAGCATACATCCCAATGTAGAGGAAAACWTGGTCGGTCAAAAGGCCA[G/T]WGAGAGACAACCGCCTAAGCTTTTTGCATGCCTGAACAATTGCCCCAAAACCTTCATCTAGTGGCTGCATGGTTACAGGATCAGGTTTTGTGGGATCAAG
Ro06-2279207	Ro06	2279207	A	T	ATACCTTTGTCGCTGTCCCCAGCGAATGCAATAGAAAGCATTTCAAGCTGCTCAGCATACATCCCAATGTAGAGGAAAACWTGGTCGGTCAAAAGGCCAK[A/T]GAGAGACAACCGCCTAAGCTTTTTGCATGCCTGAACAATTGCCCCAAAACCTTCATCTAGTGGCTGCATGGTTACAGGATCAGGTTTTGTGGGATCAAGG
Ro06-2279376	Ro06	2279376	C	T	TGGTTACAGGATCAGGTTTTGTGGGATCAAGGATGCACAATCTGAACCGTATGAAATTAGGGCAGTTCTTGGCTACAGTTATGAGAGCAGCATTAGTCAT[C/T]TGCTGGCAAAAGTACAGCAATGAATGAAGCTTTGGGCAGCCAGCAGATATGGCAACAAGGCCTTCTTCTGTCACAGCGGCATGCCCGACTCCAAATGGAT
Ro06-2283106	Ro06	2283106	A	T	AATACTCATGCCAAATCATATCTTGTTTTAGTGCTTGTCTTCCTAATTTTATTTCTTGTTTCTCTTCTTTTTTCCTAAAAGTGATCGATAGCCATGGGAA[A/T]TGGTGGGGTTGCCGTTGAAAAGGGACGTGACATAGATGATTAAATACCTACTTACCTTTTATTATACGAATAATTGAAGGTGAAAGGCATGCACCAAGAT
Ro06-2298514	Ro06	2298514	A	G	TGAATGAGAATGTACAACTTAAATCGGTATGTATGTATGTATGTATGTATATATATATGTATATATATATATACAGGCATTCTCCACTACATAGGACTAT[A/G]TACTTTTAAAGTACATAGTTCTAATACAAACCGTCAGATCAATTCATTTAAACAGATCTGACGGCTGACATTAGAACTATGTACTTTAAAAGTACATAGT
Ro06-2300062	Ro06	2300062	T	C	ATAAATAATTTTCGATGCTCAACCGATCGTGGGGTTAATCTTTTTGAGACTCTCACATCACTGTTCACAACCGTCCTAAGAACTCCACTAAATTCAAAAT[T/C]ACCAAATTTCTCTTCAAGCATGTGTTATATTAAGCAAATCTTCTCCCATTTTATCATCCTTATTATAACAAAAAAAAACTTTTAAACTCCCAAATGTCTC
Ro06-2300840	Ro06	2300840	A	T	TTGGCCGGTTTAATTACTTGTCCCACTCCCACAATTAGAACCTTTGCATGCAGTCCAAGTGGCAGCGGAGACTGATCGACTTGTTGATGTTAAAGAGGAA[A/T]CGGARKAGAGTGTTGCTTTGGATAGAGGAGAACAAAATTTCAGTGCAATTAATTCTTTCCAATATCATTATCATCATAATTAATTAGCTGATAACTAGAT
Ro06-2300845	Ro06	2300845	G	A	CGGTTTAATTACTTGTCCCACTCCCACAATTAGAACCTTTGCATGCAGTCCAAGTGGCAGCGGAGACTGATCGACTTGTTGATGTTAAAGAGGAAWCGGA[G/A]KAGAGTGTTGCTTTGGATAGAGGAGAACAAAATTTCAGTGCAATTAATTCTTTCCAATATCATTATCATCATAATTAATTAGCTGATAACTAGATGACAA
Ro06-2300846	Ro06	2300846	T	G	GGTTTAATTACTTGTCCCACTCCCACAATTAGAACCTTTGCATGCAGTCCAAGTGGCAGCGGAGACTGATCGACTTGTTGATGTTAAAGAGGAAWCGGAR[T/G]AGAGTGTTGCTTTGGATAGAGGAGAACAAAATTTCAGTGCAATTAATTCTTTCCAATATCATTATCATCATAATTAATTAGCTGATAACTAGATGACAAT
Ro06-2308201	Ro06	2308201	T	C	AAAAGGGATTCCAAGTGAGTATTTTATGCATGCTCTTGTGCTTTTCAATGAAAGAAAAGTGAATCTTCTCTTCTGCTTATGCTATGTGGCATTTATTTAC[T/C]GGMAKACTAGCATTATCATGAGAAATGTGTCCAGAATAGAGTTGCATGAAATCTTATGATTGATTAGTGTTACTTTATCATGTGGTTCAGATTCGTGATT
Ro06-2308204	Ro06	2308204	C	A	AGGGATTCCAAGTGAGTATTTTATGCATGCTCTTGTGCTTTTCAATGAAAGAAAAGTGAATCTTCTCTTCTGCTTATGCTATGTGGCATTTATTTACYGG[C/A]AKACTAGCATTATCATGAGAAATGTGTCCAGAATAGAGTTGCATGAAATCTTATGATTGATTAGTGTTACTTTATCATGTGGTTCAGATTCGTGATTTTG
Ro06-2308206	Ro06	2308206	T	G	GGATTCCAAGTGAGTATTTTATGCATGCTCTTGTGCTTTTCAATGAAAGAAAAGTGAATCTTCTCTTCTGCTTATGCTATGTGGCATTTATTTACYGGMA[T/G]ACTAGCATTATCATGAGAAATGTGTCCAGAATAGAGTTGCATGAAATCTTATGATTGATTAGTGTTACTTTATCATGTGGTTCAGATTCGTGATTTTGAA
Ro06-2330720	Ro06	2330720	G	C	AATTTTAATATCTTAGTCTTCAATTTGAGTGATATATATAATTAGACTAATTAATTACCATTGGTCCATTGCCATGCATGTGTATTATCACTGTTGAGTA[G/C]TCTTAATTGGGACCGGCGCCTTGCTGGCTGGTTCATAATTTTTTTTGGCTAATTGGAATTCACATTTGTAAAAGCCGTTTTCGATCTGTAGCTCGTAAAA
Ro06-2332567	Ro06	2332567	T	C	TTGGAGTGGATGGCTCTATCATTTCATGTGAGTTTCTTCACCCATTTGCAGCTCATTGTTTTTCAGACCGAAAAATATGATCTTGCTCCCAGTGATGAAT[T/C]GTTAGCCTTTCTGATATCTATAATCCTGTTATCTGTGAATTTTTTTTACAGCACACCTGGAAGAGTTGGAACAACTTCTTAAGGGAATTGCTATGATGAA
Ro06-2336576	Ro06	2336576	G	T	GCTCTGCCTATCATTTCTCGACTAGGTATATCTGACCAGCCTGGCTTCCTCTTAGATCTCATGGGAGAATGAATTCTGATGACCTGACATATAAAAAAAA[G/T]CTAAAAGTTGAATCATCCCTGGAAATAATYTCAGGCATGTGCCTGTATTTTCCATACAATCTCTGGAAGAAGAAAAGTTCATATTCTTACACCAAGGCAC
Ro06-2336606	Ro06	2336606	T	C	TCTGACCAGCCTGGCTTCCTCTTAGATCTCATGGGAGAATGAATTCTGATGACCTGACATATAAAAAAAAKCTAAAAGTTGAATCATCCCTGGAAATAAT[T/C]TCAGGCATGTGCCTGTATTTTCCATACAATCTCTGGAAGAAGAAAAGTTCATATTCTTACACCAAGGCACTCCAGGAGCTGGTAGTATGCTCTTCCTTGA
Ro06-2364965	Ro06	2364965	T	C	CTTCACATGTGACTGAGGTACAGAATTCCAGTTACAAAAAGAGTCAATAACTGACTTGTGCCTATTAAGTGCATTTCAAGCACAATCTCCTAGAGAAGGA[T/C]ATTAAGTTAGATCAAGTTTGATGGAACTACAAATAGACACACAATAAACACATGGCTTGTAGTTCCAAAATCAAAAAGCAGTTCATCGGAATATATTCAC
Ro06-2373442	Ro06	2373442	C	T	TAATTGACTTAGGCTTCAGAGGAGTATTAACCGGCCTGCCCGGTTATTCTCTTAACAAGCATTTATTTCATTTTAGATCTCGACCAGATTATTCCCTCAT[C/T]TACTTCCTAAACTTAGAAGAGAAAAAGAGGTTCCTGGCAATGATGGCAGCTTGTTGACTGTTATCTTSACTTCCGGTTTGTCTTTGCTTAATCGGTGTTT
Ro06-2373510	Ro06	2373510	G	C	CATTTTAGATCTCGACCAGATTATTCCCTCATYTACTTCCTAAACTTAGAAGAGAAAAAGAGGTTCCTGGCAATGATGGCAGCTTGTTGACTGTTATCTT[G/C]ACTTCCGGTTTGTCTTTGCTTAATCGGTGTTTTCATGTTGGGGCGCATGCATTGGTGAGTCTTATTGATTATGCTCTTAGTTGGTGTTTTTTGTCGCCTA
Ro06-2383951	Ro06	2383951	C	G	ATCAAGTCTTCGTGGAAGAAGAGCAGAAGAAGTTGCATGAGCACTGGTTAGTGTCTTGTGGAGACATGTATTTTTAGTCTTTGGAGAAAGATTTGATTGT[C/G]TACCTCCTAAAAATCATGTCTATGTAGGTTGCAATTGGCAAGTAAAGATCTCCCAGCAGCTTATGCAATTTGGATAGAAATGCGTTTGCAGAGAAGGAAA
Ro06-2387761	Ro06	2387761	T	C	AGAAGTTGGAGCAACAGAATCTTACTGATGAAGAAATTAATGTGCTTGAACAAAATTTCCTCATCTACTTATTTCAGGTTCTATGGCTGCTTCACCTTAA[T/C]CTTGTTTTCCTCATATATACATATGTCACATACCGACTACACTAACGTACACTTKCTGCATGTCACAAACCAGCAATGATTATATTTTTGCACAAGAAAA
Ro06-2387816	Ro06	2387816	G	T	TTTCCTCATCTACTTATTTCAGGTTCTATGGCTGCTTCACCTTAAYCTTGTTTTCCTCATATATACATATGTCACATACCGACTACACTAACGTACACTT[G/T]CTGCATGTCACAAACCAGCAATGATTATATTTTTGCACAAGAAAATCTGTTTAATTAAATGTACAATATATGAAAAGTATCTGCACTGCCAAAAAAGGCC
Ro06-2400554	Ro06	2400554	A	C	AGATGAATGAGTCCTCATAAATATGAGAACTTTGCTTCATGACTTCTAAGATAATAAGTAGGAAAGTTAGAACAATTGAAAGTCTTAGGTATCTTACATA[A/C]GAATTTTGAGGGACCAATACTGATATTCTAATTTATCTAAAGAGAAGAAAACCTGATACCAGGAAAGCCACAAATGCTCACTGATTTTGCAGAGGATCAC
Ro06-2400844	Ro06	2400844	A	G	CAAAAATCCATATGCTCAAATTTAACTATTATAGTTAGAGCAATTGCATAAATTTTAAGGTAGGATTTCAACGAAATTTTCAATACTGCATGCATACGTA[A/G]AAGTAAAGAATGCTTATATACGAAATACTGTTCGATCACCAGCATATTTTTGTGCTCATGAAATGAAAAATAATGACTGGACAGAGAATTACCATATAAG
Ro06-2417497	Ro06	2417497	T	G	TCTTCGTGTATCGATACACGCGCACACACAATTACAACAGATTGATGAAAATTTAGTTAAAAGTATGCAGTACCTACGAGTCCGTGTGCAATGCAGTTAT[T/G]CATATACATGTTGATGATGATATATAGCTATCTAGCTAGACTAGATGATGCAGAAATTGACGAGACAAGTACTGTTTGATTCCCAGGCAAATGGAAAGGG
Ro06-2424208	Ro06	2424208	G	A	CTACTTCGTATACACTACCTGTTTAACAATCTCTTTCCGGACATGCTTGTGATAATCTGGAGACTTGTACATCTGGTCTGAAAGTGCGCGAAACTGAAAA[G/A]AAAAGAGAGAGAGAGAGAGAGAGAGAGAGAAAAGGAATCAATATAATACAAAAGATATCATTAGTGAATTAATTACTACTTCTTAACCGCAGATACCTGA
Ro06-2426556	Ro06	2426556	A	G	TCTGTGCTATGTTCTTATATTTATAAACAAGCCCTTCACTAATGCAATTTCAACCCCTCCATTCTTTTGTTTGCATGTTGGGGTTCATCTTAAATTACTT[A/G]TTTTTTTTTGTTTAGATTCTTTCATATGAATATAGATGATGTTTCAATGAAGAGTTTAAGACTTGCATTRGASTRGTTTGGAGGAAAGAGAGTGTTTTCA
Ro06-2426626	Ro06	2426626	A	G	TTGCATGTTGGGGTTCATCTTAAATTACTTRTTTTTTTTTGTTTAGATTCTTTCATATGAATATAGATGATGTTTCAATGAAGAGTTTAAGACTTGCATT[A/G]GASTRGTTTGGAGGAAAGAGAGTGTTTTCACGGACTGGGKGAGAGGAATAGAGGAGATGGTATTTTGGGTAGATCAATTTTAGTTTCTCTAAACAAGGCC
Ro06-2426629	Ro06	2426629	G	C	CATGTTGGGGTTCATCTTAAATTACTTRTTTTTTTTTGTTTAGATTCTTTCATATGAATATAGATGATGTTTCAATGAAGAGTTTAAGACTTGCATTRGA[G/C]TRGTTTGGAGGAAAGAGAGTGTTTTCACGGACTGGGKGAGAGGAATAGAGGAGATGGTATTTTGGGTAGATCAATTTTAGTTTCTCTAAACAAGGCCAGA
Ro06-2426631	Ro06	2426631	A	G	TGTTGGGGTTCATCTTAAATTACTTRTTTTTTTTTGTTTAGATTCTTTCATATGAATATAGATGATGTTTCAATGAAGAGTTTAAGACTTGCATTRGAST[A/G]GTTTGGAGGAAAGAGAGTGTTTTCACGGACTGGGKGAGAGGAATAGAGGAGATGGTATTTTGGGTAGATCAATTTTAGTTTCTCTAAACAAGGCCAGATG
Ro06-2426666	Ro06	2426666	G	T	GTTTAGATTCTTTCATATGAATATAGATGATGTTTCAATGAAGAGTTTAAGACTTGCATTRGASTRGTTTGGAGGAAAGAGAGTGTTTTCACGGACTGGG[G/T]GAGAGGAATAGAGGAGATGGTATTTTGGGTAGATCAATTTTAGTTTCTCTAAACAAGGCCAGATGTCATGATTTTATTAGTGCGTCACACCGTCATACCG
Ro06-2427708	Ro06	2427708	G	A	TCTTCTCCCAATCTAGATGCCCTACCAACCTGATGGACATACTCATTAATGGAATTGGGCATGTCAAACACAATAATCTGTCTTACACCCAATAGATCTA[G/A]CCCACGGCCTAAAACACCGGTGGCTACAATAACAGGAACCTCACCCATTAAAAATGACTTCATGATATCTCTCCTCTCCTTCATGGATTTCTCCCCATGG
Ro06-2431947	Ro06	2431947	A	T	TATCGATCAATACTTTTATAATTTATTTCATGAATTGTCCACATAAAGTTTCAAAAGATGAAAAAGTGATATGAAAATTGCATGCCTTCGATAAAACTTT[A/T]TAGGCAAATGTCAAATGAGAACCACACTTTTGAGGGTGTSAAATGAGAATTTCATGCTTTTGATTAAAAAAGTGTGGTTCTCATAAGAAGAAATTTGTGA
Ro06-2431987	Ro06	2431987	C	G	ACATAAAGTTTCAAAAGATGAAAAAGTGATATGAAAATTGCATGCCTTCGATAAAACTTTWTAGGCAAATGTCAAATGAGAACCACACTTTTGAGGGTGT[C/G]AAATGAGAATTTCATGCTTTTGATTAAAAAAGTGTGGTTCTCATAAGAAGAAATTTGTGATTCCTCTCTATGTGACGTTCAACTTTTTGTGTGATGTTGA
Ro06-2433208	Ro06	2433208	C	T	GAATAGGAGGGTTGTCATGATACTCAATGATTCCATAGTCATGGATAAGACTTTATTTAGCAAGACAGTCTGCCACCATGTTGCTTTCTCTGTAGACATG[C/T]TTGAGASAGAGGTACTGAAAATTYCTCATGAGGGATTTRCAACARGAAATGAGGGAGCCAAGAGGATGRAGAGAAAYATCATGATCAAGAGTCAGTTTAA
Ro06-2433215	Ro06	2433215	G	C	AGGGTTGTCATGATACTCAATGATTCCATAGTCATGGATAAGACTTTATTTAGCAAGACAGTCTGCCACCATGTTGCTTTCTCTGTAGACATGYTTGAGA[G/C]AGAGGTACTGAAAATTYCTCATGAGGGATTTRCAACARGAAATGAGGGAGCCAAGAGGATGRAGAGAAAYATCATGATCAAGAGTCAGTTTAAGTAAAAC
Ro06-2433232	Ro06	2433232	T	C	CAATGATTCCATAGTCATGGATAAGACTTTATTTAGCAAGACAGTCTGCCACCATGTTGCTTTCTCTGTAGACATGYTTGAGASAGAGGTACTGAAAATT[T/C]CTCATGAGGGATTTRCAACARGAAATGAGGGAGCCAAGAGGATGRAGAGAAAYATCATGATCAAGAGTCAGTTTAAGTAAAACTGCAGAGTCAGTCTCAA
Ro06-2433247	Ro06	2433247	A	G	CATGGATAAGACTTTATTTAGCAAGACAGTCTGCCACCATGTTGCTTTCTCTGTAGACATGYTTGAGASAGAGGTACTGAAAATTYCTCATGAGGGATTT[A/G]CAACARGAAATGAGGGAGCCAAGAGGATGRAGAGAAAYATCATGATCAAGAGTCAGTTTAAGTAAAACTGCAGAGTCAGTCTCAACCTCAATATGAGTAA
Ro06-2433253	Ro06	2433253	A	G	TAAGACTTTATTTAGCAAGACAGTCTGCCACCATGTTGCTTTCTCTGTAGACATGYTTGAGASAGAGGTACTGAAAATTYCTCATGAGGGATTTRCAACA[A/G]GAAATGAGGGAGCCAAGAGGATGRAGAGAAAYATCATGATCAAGAGTCAGTTTAAGTAAAACTGCAGAGTCAGTCTCAACCTCAATATGAGTAATATTGC
Ro06-2433277	Ro06	2433277	A	G	CTGCCACCATGTTGCTTTCTCTGTAGACATGYTTGAGASAGAGGTACTGAAAATTYCTCATGAGGGATTTRCAACARGAAATGAGGGAGCCAAGAGGATG[A/G]AGAGAAAYATCATGATCAAGAGTCAGTTTAAGTAAAACTGCAGAGTCAGTCTCAACCTCAATATGAGTAATATTGCAGTTAAGAGCTTGTTTAAGACCAT
Ro06-2433285	Ro06	2433285	C	T	ATGTTGCTTTCTCTGTAGACATGYTTGAGASAGAGGTACTGAAAATTYCTCATGAGGGATTTRCAACARGAAATGAGGGAGCCAAGAGGATGRAGAGAAA[C/T]ATCATGATCAAGAGTCAGTTTAAGTAAAACTGCAGAGTCAGTCTCAACCTCAATATGAGTAATATTGCAGTTAAGAGCTTGTTTAAGACCATAGAATAGA
Ro06-2468610	Ro06	2468610	G	A	TAATAGCTGTAATCGATGCTATTGAATTAGCTCGATCGATCTGTACGTTCCTTTTAATTCAGAAATAAAATTTTAATTATTAATAAAGAATTGAGTACAT[G/A]CTGAACGTATATATTTACTAACCCATTTTCTATCACGGTTTTGCTGCTCTGGCCAGCTGTCAAGCTCTGCAGTTACCTCTAATGCAAACATGTAGCCTCT
Ro06-2474657	Ro06	2474657	C	T	TAGAAACTTAGAATCCTCCCCTTTTTAGTGTCCGTAATTTCCTTGCAGCTGAGCAATTTTTTTTGTATGAGCAGCTAGCTGAGCGATTATAAAGATGAAA[C/T]ACACGCCAAACCATCAGCCTGACTTAATTTTCGTCTAGCATGCAGCTTCTTAATTAGTTTTTAGTTACTAGCAATTATACACACATGATGTGTGTAAAAC
Ro06-2501115	Ro06	2501115	C	T	GTCTGTACTCGGATACTTGCAGCACCACCACCAACCACCGCAAGTACCACCAACAAGAACCAAGGATGATTCTGGACCTGATTAAGAAAGCTGAACCAAA[C/T]CCGTCCCATGATCCAAATCAGTAATAAAACCAAGCTTTGGTTCAATACCCACTGTGACTGTGCGCACATGGCCAGCCCATCGATGTAACTTCCTGAGAAC
Ro06-2552345	Ro06	2552345	G	T	ATCACAATAGGACGATGATTCAGTATTAGTCCTTGGATAGACATAGACAGAGAGTATGAATGAATTCCTTGCTACCCCAGTTTAGCCTTAGGAGCCTTTT[G/T]CCTGCAAATTTCACCTGTTTAGGAATATATCAGAATGCATGCTTTCATGAAGCTCTAGTGCTTCTCTTAGCATTTATTTGTTGCAAAGACATCTGTAATA
Ro06-2563874	Ro06	2563874	T	C	CACTTTTGAAGTGGCATATATCTTTCATAGAGTTTATGGAAGATTCTGGTGTGCCCCCCAGGTGGACATGTCCCCATTTTTTTTTTTGGCGCGTGAGATG[T/C]ACTCTCCTTATGCTTTACATACRTGGGCCAATCTCAGYCGTTGGGAGGACTGATGGTTCATTGCCAAGATCTGAGCCATTGATCGTTTCCAGCCCAGGCT
Ro06-2563897	Ro06	2563897	A	G	TTCATAGAGTTTATGGAAGATTCTGGTGTGCCCCCCAGGTGGACATGTCCCCATTTTTTTTTTTGGCGCGTGAGATGYACTCTCCTTATGCTTTACATAC[A/G]TGGGCCAATCTCAGYCGTTGGGAGGACTGATGGTTCATTGCCAAGATCTGAGCCATTGATCGTTTCCAGCCCAGGCTTCGGCCTCTACTTCGTCCTCTCC
Ro06-2563912	Ro06	2563912	C	T	GAAGATTCTGGTGTGCCCCCCAGGTGGACATGTCCCCATTTTTTTTTTTGGCGCGTGAGATGYACTCTCCTTATGCTTTACATACRTGGGCCAATCTCAG[C/T]CGTTGGGAGGACTGATGGTTCATTGCCAAGATCTGAGCCATTGATCGTTTCCAGCCCAGGCTTCGGCCTCTACTTCGTCCTCTCCAACTCCACCTCTCCC
Ro06-2599390	Ro06	2599390	C	T	TTCCATAAGTTAAGCTTAAGAATTATATGAAAGCAGTCATCCAATCAGGCCCACATGTATGCAGAATACCAGAAAATCCATCCTGGCTAGATGGTAGTCA[C/T]GCTCAGAAATATGGTTTATGCTTTACTCCTAYGCTYGTATAGTTACATCAAAGAGAATATTTAATGATCGGAATAAGGAGAAACTACAGCCTAGAGGTCA
Ro06-2599422	Ro06	2599422	T	C	GCAGTCATCCAATCAGGCCCACATGTATGCAGAATACCAGAAAATCCATCCTGGCTAGATGGTAGTCAYGCTCAGAAATATGGTTTATGCTTTACTCCTA[T/C]GCTYGTATAGTTACATCAAAGAGAATATTTAATGATCGGAATAAGGAGAAACTACAGCCTAGAGGTCATATGAACTTATCCATCCAAGAATTAAATACCA
Ro06-2599426	Ro06	2599426	T	C	TCATCCAATCAGGCCCACATGTATGCAGAATACCAGAAAATCCATCCTGGCTAGATGGTAGTCAYGCTCAGAAATATGGTTTATGCTTTACTCCTAYGCT[T/C]GTATAGTTACATCAAAGAGAATATTTAATGATCGGAATAAGGAGAAACTACAGCCTAGAGGTCATATGAACTTATCCATCCAAGAATTAAATACCATCTA
Ro06-2642729	Ro06	2642729	C	T	CAAAGTCACATTTCTTATGCATACCAGAAAACTAAAACTTACTTCGATCTGCATCTTGTTATTTCATATTTGGCACTTCATTATTTTTAACTACTTAGTA[C/T]GASTGAARCCCAAAGCGGAGTGCCAAAATCACTYATAATAGTGCCATGCCATTAGTTTAATTAATTGCATGCGGTGATTTCAGTTGATCATGTTGTGCAT
Ro06-2642732	Ro06	2642732	C	G	AGTCACATTTCTTATGCATACCAGAAAACTAAAACTTACTTCGATCTGCATCTTGTTATTTCATATTTGGCACTTCATTATTTTTAACTACTTAGTAYGA[C/G]TGAARCCCAAAGCGGAGTGCCAAAATCACTYATAATAGTGCCATGCCATTAGTTTAATTAATTGCATGCGGTGATTTCAGTTGATCATGTTGTGCATATC
Ro06-2642737	Ro06	2642737	A	G	CATTTCTTATGCATACCAGAAAACTAAAACTTACTTCGATCTGCATCTTGTTATTTCATATTTGGCACTTCATTATTTTTAACTACTTAGTAYGASTGAA[A/G]CCCAAAGCGGAGTGCCAAAATCACTYATAATAGTGCCATGCCATTAGTTTAATTAATTGCATGCGGTGATTTCAGTTGATCATGTTGTGCATATCGTCTC
Ro06-2642763	Ro06	2642763	T	C	AAACTTACTTCGATCTGCATCTTGTTATTTCATATTTGGCACTTCATTATTTTTAACTACTTAGTAYGASTGAARCCCAAAGCGGAGTGCCAAAATCACT[T/C]ATAATAGTGCCATGCCATTAGTTTAATTAATTGCATGCGGTGATTTCAGTTGATCATGTTGTGCATATCGTCTCAATCTGCTACTTATTTGCATTGATTC
Ro06-2837851	Ro06	2837851	T	C	GTATCATTTTAGAAATTAAAAACTTAAAGATCTGCAGTTTTTGTTTAATATCATTTTTGTTGTTTTTGTATATTTTTGAAATTATGGAAATTGCTGAGGG[T/C]TATGMAGGTTTTCTGTTGCAAATTATATGTATCCTTGATTGGTGCAATGTTGTTGGTAAAATAGAAAAGAAGTTGTAGTCTTGGTATGAATTTCACATGT
Ro06-2837856	Ro06	2837856	C	A	ATTTTAGAAATTAAAAACTTAAAGATCTGCAGTTTTTGTTTAATATCATTTTTGTTGTTTTTGTATATTTTTGAAATTATGGAAATTGCTGAGGGYTATG[C/A]AGGTTTTCTGTTGCAAATTATATGTATCCTTGATTGGTGCAATGTTGTTGGTAAAATAGAAAAGAAGTTGTAGTCTTGGTATGAATTTCACATGTCACTG
Ro06-2848793	Ro06	2848793	G	A	AGTTTGGCCACTGGAAACTCAGAAATCACCTTCCGGACATGCAATGAAGAGCCGGTCAAAGTGACCCCTTAGAAAGTCAAACTGCAACGAGCACTCCCCT[G/A]TTAGACCAATATTGCGACAGATCCAACGGTCTGTTTAGAGAGAAATTTAAACCTGGCACAGAAGACTCATATGAGAAGCTTTCCCAACTTGTTTCACTGC
Ro06-2849066	Ro06	2849066	A	C	CTAATCAACACCTCTTGGGGTTTCTCCCTCCAAAGCTCCATATCCTAGCTCCTCCCAACCTCCCAAAACCTTTATTCATTACTAAATAGTGCTGAAAAAC[A/C]AAAATTTCTTTTCCAAGTGGGGTGCCTCCCCACAAGCGCTTCGGTTTATAGACCTAAAAAGCCGGTCTTGGTTCCTCCTTGACGAAATTATGGTGGCTCA
Ro06-2908227	Ro06	2908227	C	T	CCTTGAGGGATGACTTTGCATCCTTCTGAGACGTCTATCCTTGCCGGCAGATTTGCAGCAGGTATATGTGATCTTGTCACTTTAGCTAAGTCATTAAATG[C/T]GTCTGGAAATTGATTAGCAACATTTTGTAGACTTAGTATTCTTTGCACTTCCATATCATTGTTGGAAGATGGGGGATCAAGATAAGACTGAGTGGGTATA
Ro06-2920335	Ro06	2920335	A	T	TAAAATCTCACAATTTCTGGGTATGCATGGCAATACATGTCAAGTGTGCTTCTCGGATTGCAATCAATGAATCAACAAAGGTGAAGTGTACATGGTGATC[A/T]AGCAATCATRAATCATGCATATTAAACTCAAAGMAAATCATATCAAGCCTCAATAATGATCACAGTCTCTAGAACACAACAAAGTAAGCTCAATTCATCA
Ro06-2920345	Ro06	2920345	G	A	CAATTTCTGGGTATGCATGGCAATACATGTCAAGTGTGCTTCTCGGATTGCAATCAATGAATCAACAAAGGTGAAGTGTACATGGTGATCWAGCAATCAT[G/A]AATCATGCATATTAAACTCAAAGMAAATCATATCAAGCCTCAATAATGATCACAGTCTCTAGAACACAACAAAGTAAGCTCAATTCATCATTGGGGTCGG
Ro06-2920369	Ro06	2920369	C	A	ACATGTCAAGTGTGCTTCTCGGATTGCAATCAATGAATCAACAAAGGTGAAGTGTACATGGTGATCWAGCAATCATRAATCATGCATATTAAACTCAAAG[C/A]AAATCATATCAAGCCTCAATAATGATCACAGTCTCTAGAACACAACAAAGTAAGCTCAATTCATCATTGGGGTCGGAGAAAATGGACACAAAACACAAAC
Ro06-2932595	Ro06	2932595	T	G	CGCATGCTTTCCGTTTAGGCACGAACAATCACCAACAACAAGGTTTCAAGACTTTGCAATCCAATGCTCACGACCTTTGGTGATGCTTATCATGATGTAC[T/G]TCAAAAGTCGGGGATATGGGGTTGCCTCCCCATGAGCGCTTGTTTTTAGAGACCCTCAACCCGGTCTTTCTTCCTCCTTAGGTGACATTGGGAACTTCGG
Ro06-2960901	Ro06	2960901	C	T	AAAATCATGCAATTACTTTAGCTTGATAAAATAATTATTATGCATATATTAAATGAAAATATATGAGGTATGTAGCATGATCATGCTTTAACACTTTGAA[C/T]TGAGTGTAGTGCAATTGTRTATTCGACATTAGCATGATAAATTGATACTCATAGATGGTCATATGAATTTTAAGTGCATTGTCAGATACTGTTGTGGGTA
Ro06-2960920	Ro06	2960920	G	A	AGCTTGATAAAATAATTATTATGCATATATTAAATGAAAATATATGAGGTATGTAGCATGATCATGCTTTAACACTTTGAAYTGAGTGTAGTGCAATTGT[G/A]TATTCGACATTAGCATGATAAATTGATACTCATAGATGGTCATATGAATTTTAAGTGCATTGTCAGATACTGTTGTGGGTAAGTAACCCGTAGCACATGC
Ro06-3143240	Ro06	3143240	G	A	ACTTCTAAAAGCATGTGTTTAATCTATTTTGATAGAGATTGTGGGCTTGATAACCTTATTCTCTCTAGACAATTGGCAATGGATGTGATGAGCATGTCTT[G/A]TTTGAATCCCTAGGTCTTAATGCCCATAGCCTTAGTCTAGTAATTTGGGACCCATTGCATGGCTCAAGTTGTTGGGCTAAGAGGCTTTATGAACCATTGC
Ro06-3143342	Ro06	3143342	T	C	TTGAATCCCTAGGTCTTAATGCCCATAGCCTTAGTCTAGTAATTTGGGACCCATTGCATGGCTCAAGTTGTTGGGCTAAGAGGCTTTATGAACCATTGCA[T/C]RGCATAGAGGTACACTTGAAAAGACCATGKCCCTAGAACCCTTGTACGGCTAGGGTACGGGATTTGATCCACTAATCAATCTCACTTGCATGTTTATGTG
Ro06-3143343	Ro06	3143343	G	A	TGAATCCCTAGGTCTTAATGCCCATAGCCTTAGTCTAGTAATTTGGGACCCATTGCATGGCTCAAGTTGTTGGGCTAAGAGGCTTTATGAACCATTGCAY[G/A]GCATAGAGGTACACTTGAAAAGACCATGKCCCTAGAACCCTTGTACGGCTAGGGTACGGGATTTGATCCACTAATCAATCTCACTTGCATGTTTATGTGA
Ro06-3143372	Ro06	3143372	G	T	TTAGTCTAGTAATTTGGGACCCATTGCATGGCTCAAGTTGTTGGGCTAAGAGGCTTTATGAACCATTGCAYRGCATAGAGGTACACTTGAAAAGACCATG[G/T]CCCTAGAACCCTTGTACGGCTAGGGTACGGGATTTGATCCACTAATCAATCTCACTTGCATGTTTATGTGATTTAATCAACCATTGGATTTGGGCTAAGG
Ro06-3161950	Ro06	3161950	T	C	GATAGACTGGATGATGCTTTGTGGGCTTATAGGACGGCTTATAAGACACCTATTGGGATGAGTCCTTTTCGGTTGGTGTATGGAAAGGCATGTCATCTTC[T/C]TGTRGAGTTGGAGCACAAAGCATATTGGGCAATTCAGAAGCTCAATTTTGAYATGAAGGCAGCTGGTGAACATCGGAAGCTACAATTGAATGAGCTTGAT
Ro06-3161954	Ro06	3161954	G	A	GACTGGATGATGCTTTGTGGGCTTATAGGACGGCTTATAAGACACCTATTGGGATGAGTCCTTTTCGGTTGGTGTATGGAAAGGCATGTCATCTTCYTGT[G/A]GAGTTGGAGCACAAAGCATATTGGGCAATTCAGAAGCTCAATTTTGAYATGAAGGCAGCTGGTGAACATCGGAAGCTACAATTGAATGAGCTTGATGAGA
Ro06-3162002	Ro06	3162002	C	T	TTGGGATGAGTCCTTTTCGGTTGGTGTATGGAAAGGCATGTCATCTTCYTGTRGAGTTGGAGCACAAAGCATATTGGGCAATTCAGAAGCTCAATTTTGA[C/T]ATGAAGGCAGCTGGTGAACATCGGAAGCTACAATTGAATGAGCTTGATGAGATGAGGAATGAGGCTTATGAGAGTAGCCGCATTTACATGGACAAGACTA
Ro06-3276180	Ro06	3276180	T	C	AGCCCGCAGCAGGAGAGGACTCAGCTAGGCGACAGGCCTAGCCGTACTGTGAGTGGACATTTGTTTTTAAATAAATATGTGCATGCAATAAATTGTTTTA[T/C]TATYATTCTAGCATGATTTTTTTTCACTATTTAATAGTTCGAGGTGTAAGAATAACCTATGTTGCCAGTACCGAGCCACCTCAGTAGAATCAGTGTGTTA
Ro06-3276184	Ro06	3276184	T	C	CGCAGCAGGAGAGGACTCAGCTAGGCGACAGGCCTAGCCGTACTGTGAGTGGACATTTGTTTTTAAATAAATATGTGCATGCAATAAATTGTTTTAYTAT[T/C]ATTCTAGCATGATTTTTTTTCACTATTTAATAGTTCGAGGTGTAAGAATAACCTATGTTGCCAGTACCGAGCCACCTCAGTAGAATCAGTGTGTTAGGGT
Ro06-3302757	Ro06	3302757	A	G	GCCAGTAATAATGAGCCAAATTTATTGATGGATGTTGGAGAGAAGATGATATGAAATTGCATGTTCCATCACAAATTATAATGGATTTGAGTCTGGGATT[A/G]TCAAGAGATCTGATGAAAAGGAAGAAATAATAAATAAAAAAAGACGCAAGGCAGAGATATGTGGGAAGGGGATAGAGAAGGAGGAGAGAGAATGAGGGAT
Ro06-3308759	Ro06	3308759	T	C	CTTAAGAGATTAATTATGGATATATTGATGTTGCATGCTAATGCTTCGTTTGTCATTGTTAAATCCATTTTGGATTATTGAGGTAGATGGCTTACTAAGT[T/C]GAATAAGTTAGTAAYGTAGATGGTGCATTCTACGAGTGAAGTGTATGGATGATTGTTTCAAGATCAAGGGTCAATGATTACACATTGATCACTAACTATG
Ro06-3308774	Ro06	3308774	T	C	ATGGATATATTGATGTTGCATGCTAATGCTTCGTTTGTCATTGTTAAATCCATTTTGGATTATTGAGGTAGATGGCTTACTAAGTYGAATAAGTTAGTAA[T/C]GTAGATGGTGCATTCTACGAGTGAAGTGTATGGATGATTGTTTCAAGATCAAGGGTCAATGATTACACATTGATCACTAACTATGACCTAGTATGATTAG
Ro06-3459188	Ro06	3459188	G	T	GTGCTCCAATCCTTGCGGTTAGGGTTAACCGTTTTCTCCAAAATGCTCTTGATCTCTCGATTGGAAACTTCAGCTTGTCCATTCGTTTGAGGATGATAAG[G/T]CGTGGAAACCTTATGTGTGACACCATATTTCTTGAACAAGGCTTCAATGGTGCGGTTACAAWAGTGTGATCCTCCATCACTGATGATTGCTCTTGGCATG
Ro06-3459250	Ro06	3459250	A	T	GGAAACTTCAGCTTGTCCATTCGTTTGAGGATGATAAGKCGTGGAAACCTTATGTGTGACACCATATTTCTTGAACAAGGCTTCAATGGTGCGGTTACAA[A/T]AGTGTGATCCTCCATCACTGATGATTGCTCTTGGCATGCCAAACCTAGAGAAAATATTAGACTGAACAAAATCAGAAACAACTTTGGCGTCATTAGTTCG
Ro06-3472907	Ro06	3472907	G	C	CATAATCAAAAACCAAGTTGATTCCAAGCGGTAACCCAAGGTGGAACGTGCGGCCTAGGTGCAATGTCTAGACTTAAATGACTTTCCTTAGTTTCAGAAG[G/C]TGAATGGCCAGATCATATGAGAGATAAGCGAGAGGCAGGATTCATTTAGTGGTACTACGGAGGCAAGCCTCTATCGACTTTCGTCAGTCTGTAGTCCTCT
Ro06-3495819	Ro06	3495819	C	T	TTAACCGCCGTTTGTTTGTTTGATCCACAAAAAGATGAGATGGTTGATTATTCCTAAATGTCTGTATTGAAGTTAGTGTAACAAGAATGGACCTATGCAC[C/T]ATGTGCTAAGTACAAATGTGGAGCACACACCATAGTGTRGCCRAGAGCAACATGCTTGCCCAGGTTACGCCATTTTTGGCCTTGAAGGTTTCTTATGCTA
Ro06-3495858	Ro06	3495858	G	A	ATGGTTGATTATTCCTAAATGTCTGTATTGAAGTTAGTGTAACAAGAATGGACCTATGCACYATGTGCTAAGTACAAATGTGGAGCACACACCATAGTGT[G/A]GCCRAGAGCAACATGCTTGCCCAGGTTACGCCATTTTTGGCCTTGAAGGTTTCTTATGCTAAAGGCAGATAACTGAACTGACTAAGTAGAAATGTACACC
Ro06-3495862	Ro06	3495862	A	G	TTGATTATTCCTAAATGTCTGTATTGAAGTTAGTGTAACAAGAATGGACCTATGCACYATGTGCTAAGTACAAATGTGGAGCACACACCATAGTGTRGCC[A/G]AGAGCAACATGCTTGCCCAGGTTACGCCATTTTTGGCCTTGAAGGTTTCTTATGCTAAAGGCAGATAACTGAACTGACTAAGTAGAAATGTACACCTTTT
Ro06-3496511	Ro06	3496511	A	G	ACAACTGATGATCTTAACAAGAAGAATCACCAAGGCGATGACAATAAGGCAGCGTACCTGAGAATCTCACCTCATGTCCACATGGCTGAGGAAGGGTTTT[A/G]CAACCACATTGCCGATGTCASTAAARGACCATGCGGTACATGCACACACCTCTACAATGTTGGTCCAGACAACGTAAAGAGATGCAATTGTGTGCTATGT
Ro06-3496532	Ro06	3496532	G	C	AAGAATCACCAAGGCGATGACAATAAGGCAGCGTACCTGAGAATCTCACCTCATGTCCACATGGCTGAGGAAGGGTTTTRCAACCACATTGCCGATGTCA[G/C]TAAARGACCATGCGGTACATGCACACACCTCTACAATGTTGGTCCAGACAACGTAAAGAGATGCAATTGTGTGCTATGTCATTGGGAACAAGATCAGGGG
Ro06-3496537	Ro06	3496537	G	A	TCACCAAGGCGATGACAATAAGGCAGCGTACCTGAGAATCTCACCTCATGTCCACATGGCTGAGGAAGGGTTTTRCAACCACATTGCCGATGTCASTAAA[G/A]GACCATGCGGTACATGCACACACCTCTACAATGTTGGTCCAGACAACGTAAAGAGATGCAATTGTGTGCTATGTCATTGGGAACAAGATCAGGGGGAAGA
Ro06-3568208	Ro06	3568208	C	A	CTTAGCCCGGAGCTTTTTGTTCTCTTGCATCAGATTTTTAGCCTCTTGATCTTTCAGCTGATTTCCAGTATGATTAACCAGCTACCAAAAAATTCATAAA[C/A]GAAAAAGCRTTAAGCAAAAGGAAGTTTCATAGTTTAAATAACATGTGCAGACCATATCTCTACAGACAGGTACTGCATCGTGTCAGCATGGGTACATTAT
Ro06-3568217	Ro06	3568217	G	A	GAGCTTTTTGTTCTCTTGCATCAGATTTTTAGCCTCTTGATCTTTCAGCTGATTTCCAGTATGATTAACCAGCTACCAAAAAATTCATAAAMGAAAAAGC[G/A]TTAAGCAAAAGGAAGTTTCATAGTTTAAATAACATGTGCAGACCATATCTCTACAGACAGGTACTGCATCGTGTCAGCATGGGTACATTATGTCTGGGCC
Ro06-3573653	Ro06	3573653	G	A	TCTCTAATGTCTCAGTAGTGGGGTTGAATTCGTAATCCACCTGCAATTAACATACGATGTTGATTGAGAACAAAGATAAATAACAAGCGGCATTTCAGCT[G/A]CCCATGGAACCAAAAACAACAAGACAATTGAGATCTGTGAAACATAATGTGCATGCTCATTCGTCCTAGTGCCAGAGATCATGTTGCAATTACATATTGC
Ro06-3615810	Ro06	3615810	T	A	AAATAGGAGCATATGCATGAGAAAAGGAACTGTGGCTAGCTAGGTGGTCAGATTGGGGAATAATGGCTGTAAGAATTAATATAGATAAAACATGTTTATC[T/A]AAGTAGCATTAGTTTAACTCTAGTATTCGCAGAATATATAAGTAATCGATAAACTAAAGGATTAAGAGGATCTATTGCGTAATGCTTACTTTATTATGTA
Ro06-3621564	Ro06	3621564	A	C	AGATTTCCTCCAGAAGGATCCAAATACACTCCACCACACCAATCCTGTGAATTTAAATGGAAGGATTACTGTCCATTAGTCTTCAGGTAGCTAGGTCTCA[A/C]CTTGCTAGCTTGTAAATATGTAAACTATATCTTGTTCTTGCTTCATCGATCATTCAACTACTAGCTGTTTAGCACATATATATACATAAAAAAATAAAAA
Ro06-3624353	Ro06	3624353	T	G	AGGGACGAGCGCCAATGAGGAAACAAATGAGATGGTGGTTGGAAGAAGGTTGCATGCTTATAACACTGTTGCATCGATCTATATTAACAGCACAATTTAA[T/G]ACATATATAATTGCAGAYAATGTAAGAAATCGTGTTAAGACTTGAAAAAAGTTTTATGGTATAGTTAGTGACATACTAAGCCAGAGTRGATTCACTTGGG
Ro06-3624371	Ro06	3624371	T	C	GGAAACAAATGAGATGGTGGTTGGAAGAAGGTTGCATGCTTATAACACTGTTGCATCGATCTATATTAACAGCACAATTTAAKACATATATAATTGCAGA[T/C]AATGTAAGAAATCGTGTTAAGACTTGAAAAAAGTTTTATGGTATAGTTAGTGACATACTAAGCCAGAGTRGATTCACTTGGGATGCAACTTCAAAGATGA
Ro06-3624441	Ro06	3624441	A	G	AGCACAATTTAAKACATATATAATTGCAGAYAATGTAAGAAATCGTGTTAAGACTTGAAAAAAGTTTTATGGTATAGTTAGTGACATACTAAGCCAGAGT[A/G]GATTCACTTGGGATGCAACTTCAAAGATGATAATAGTAGATTCAGAGCATGCTTGGGAAGAATATGTCCAGGTAAATTGGCTTTGTAATTTCATATCTTT
Ro06-3631567	Ro06	3631567	C	G	CTATGCTTGAGATTTTGATATGGGTATGTTCATTGTCCATTTTGTTATGTGTTAGATGCATGTCTAGGAACTTTATCACTTCTAAAAACATGTGTTTAAT[C/G]TATTTTGGTAGAGATTGTGAGCTTGATAACCTTATTCTCTCTAGAGAATTGGCAATGGATGTGATGAGCTKGTCTTGTTTGAATCCCTAGGTCTTAGTGC
Ro06-3631638	Ro06	3631638	T	G	TTTATCACTTCTAAAAACATGTGTTTAATSTATTTTGGTAGAGATTGTGAGCTTGATAACCTTATTCTCTCTAGAGAATTGGCAATGGATGTGATGAGCT[T/G]GTCTTGTTTGAATCCCTAGGTCTTAGTGCCCATTGCCTTAGTTTAGCAATTTGAGAACCATAGCATTGCTTAAGTTGTTAAACCAAGAGACTTTGTGAAC
Ro06-3714782	Ro06	3714782	C	T	CAACCACATATTCGTTGCCCTGACATTCTACATGAATGAAATTGTTTGTGATTTAGGAAGTCAAACACAGATCAATGAAGTTGATAAAATGCTTTCTTTG[C/T]TGGAAGTAAACTTTCACAGTAGGGAAGAACTTTATTGCTATTGTCCGTAAGATTTCATTCAAGGAATGGTATGTAACAATTATAAGAAGAACTAAAGCTG
Ro06-3717742	Ro06	3717742	C	T	TTACAAATGCTAAAAGTGTTTTTTTTTTTGGACAAATAATGCTAAAAGTCTATCTCCAATAAGAGGGCTATATGGAGATCTACAGCTCTCTAGACCATTT[C/T]ATGGTCTCCAACAAGYGAATTTATGGGGGGAAAATGAGTGGGCCCAGGGYTGGGRGRGAGCTAGAGRGCTCAAAATRCCCYTGAGGGTGACCRTGAAGAG
Ro06-3717758	Ro06	3717758	C	T	TGTTTTTTTTTTTGGACAAATAATGCTAAAAGTCTATCTCCAATAAGAGGGCTATATGGAGATCTACAGCTCTCTAGACCATTTYATGGTCTCCAACAAG[C/T]GAATTTATGGGGGGAAAATGAGTGGGCCCAGGGYTGGGRGRGAGCTAGAGRGCTCAAAATRCCCYTGAGGGTGACCRTGAAGAGCACRTGCAGTGTGCRT
Ro06-3717792	Ro06	3717792	C	T	TATCTCCAATAAGAGGGCTATATGGAGATCTACAGCTCTCTAGACCATTTYATGGTCTCCAACAAGYGAATTTATGGGGGGAAAATGAGTGGGCCCAGGG[C/T]TGGGRGRGAGCTAGAGRGCTCAAAATRCCCYTGAGGGTGACCRTGAAGAGCACRTGCAGTGTGCRTGTGATGCTCTTTTTTGTCTGGGCATGCATGTGAA
Ro06-3717797	Ro06	3717797	G	A	CCAATAAGAGGGCTATATGGAGATCTACAGCTCTCTAGACCATTTYATGGTCTCCAACAAGYGAATTTATGGGGGGAAAATGAGTGGGCCCAGGGYTGGG[G/A]GRGAGCTAGAGRGCTCAAAATRCCCYTGAGGGTGACCRTGAAGAGCACRTGCAGTGTGCRTGTGATGCTCTTTTTTGTCTGGGCATGCATGTGAAGTATA
Ro06-3717799	Ro06	3717799	G	A	AATAAGAGGGCTATATGGAGATCTACAGCTCTCTAGACCATTTYATGGTCTCCAACAAGYGAATTTATGGGGGGAAAATGAGTGGGCCCAGGGYTGGGRG[G/A]GAGCTAGAGRGCTCAAAATRCCCYTGAGGGTGACCRTGAAGAGCACRTGCAGTGTGCRTGTGATGCTCTTTTTTGTCTGGGCATGCATGTGAAGTATAAT
Ro06-3717809	Ro06	3717809	G	A	CTATATGGAGATCTACAGCTCTCTAGACCATTTYATGGTCTCCAACAAGYGAATTTATGGGGGGAAAATGAGTGGGCCCAGGGYTGGGRGRGAGCTAGAG[G/A]GCTCAAAATRCCCYTGAGGGTGACCRTGAAGAGCACRTGCAGTGTGCRTGTGATGCTCTTTTTTGTCTGGGCATGCATGTGAAGTATAATTGCACAACAA
Ro06-3717819	Ro06	3717819	A	G	ATCTACAGCTCTCTAGACCATTTYATGGTCTCCAACAAGYGAATTTATGGGGGGAAAATGAGTGGGCCCAGGGYTGGGRGRGAGCTAGAGRGCTCAAAAT[A/G]CCCYTGAGGGTGACCRTGAAGAGCACRTGCAGTGTGCRTGTGATGCTCTTTTTTGTCTGGGCATGCATGTGAAGTATAATTGCACAACAAGGACATGTGT
Ro06-3717823	Ro06	3717823	C	T	ACAGCTCTCTAGACCATTTYATGGTCTCCAACAAGYGAATTTATGGGGGGAAAATGAGTGGGCCCAGGGYTGGGRGRGAGCTAGAGRGCTCAAAATRCCC[C/T]TGAGGGTGACCRTGAAGAGCACRTGCAGTGTGCRTGTGATGCTCTTTTTTGTCTGGGCATGCATGTGAAGTATAATTGCACAACAAGGACATGTGTCATT
Ro06-3717835	Ro06	3717835	A	G	ACCATTTYATGGTCTCCAACAAGYGAATTTATGGGGGGAAAATGAGTGGGCCCAGGGYTGGGRGRGAGCTAGAGRGCTCAAAATRCCCYTGAGGGTGACC[A/G]TGAAGAGCACRTGCAGTGTGCRTGTGATGCTCTTTTTTGTCTGGGCATGCATGTGAAGTATAATTGCACAACAAGGACATGTGTCATTCAAACAAATTAT
Ro06-3717846	Ro06	3717846	A	G	GTCTCCAACAAGYGAATTTATGGGGGGAAAATGAGTGGGCCCAGGGYTGGGRGRGAGCTAGAGRGCTCAAAATRCCCYTGAGGGTGACCRTGAAGAGCAC[A/G]TGCAGTGTGCRTGTGATGCTCTTTTTTGTCTGGGCATGCATGTGAAGTATAATTGCACAACAAGGACATGTGTCATTCAAACAAATTATCAATAAAATGA
Ro06-3717857	Ro06	3717857	A	G	GYGAATTTATGGGGGGAAAATGAGTGGGCCCAGGGYTGGGRGRGAGCTAGAGRGCTCAAAATRCCCYTGAGGGTGACCRTGAAGAGCACRTGCAGTGTGC[A/G]TGTGATGCTCTTTTTTGTCTGGGCATGCATGTGAAGTATAATTGCACAACAAGGACATGTGTCATTCAAACAAATTATCAATAAAATGAAGGGTTGAGAT
Ro06-3724025	Ro06	3724025	T	C	CTGATCATGATACTATTCTTGATTAATTAATCTTACTAATCAGTAGCTCTGATTGATATATTTATCAATTGGTTTTTAGTTCATTGATCTAGTTAAAATT[T/C]GAGGTATTGGTTGATATATTTAGTATAATACTTTGAACTGAATTGAAAGGTCCCTTTTGACTATATGGAGCATGTTATTCTTATGAGTAGGAGCTAAATT
Ro06-3746677	Ro06	3746677	A	C	TAAGTACCAACACAAACAAACAGATACACATTCTTCGGTCTATCTCAGATACCCAGCCAGATCTTAAATGTGTATACACTGAATAAAGTATCACAAATTG[A/C]GGGATGAAACTAGCATATGAATATATGATCATTAAATGTTAGGATGATGAGATGGGACATATATTGAAGAGAAAAAATGYAGGCAAATATCCAGTAAYTC
Ro06-3746757	Ro06	3746757	T	C	GAATAAAGTATCACAAATTGMGGGATGAAACTAGCATATGAATATATGATCATTAAATGTTAGGATGATGAGATGGGACATATATTGAAGAGAAAAAATG[T/C]AGGCAAATATCCAGTAAYTCATATTATCCTCGAAACTTCCAGAATTGCATGTCAAGTCTATTCCACCAATAATTCATCTCTTGTAATAAAACATGCAAGT
Ro06-3746775	Ro06	3746775	C	T	TGMGGGATGAAACTAGCATATGAATATATGATCATTAAATGTTAGGATGATGAGATGGGACATATATTGAAGAGAAAAAATGYAGGCAAATATCCAGTAA[C/T]TCATATTATCCTCGAAACTTCCAGAATTGCATGTCAAGTCTATTCCACCAATAATTCATCTCTTGTAATAAAACATGCAAGTTTTGAGACAAAGGTATAT
Ro06-3747238	Ro06	3747238	G	C	AAAACAAAAAGGTGACTCTTCTTACTTGACCACATGTGAGTATACAAGCAATCGCATGGCTTGCTTCATGCAGGAAAACTGTAATGAGCTTAAAAGGCGT[G/C]AGTAGTATTGTCCTCCACAGCTTTAACATCATAAAAAAACTTTTAGATAAAAAGGCTAACTGGATCAAGTAAATGATAGACCACTAAAGAGGTGATAAAA
Ro06-3757496	Ro06	3757496	T	C	TTGCATGTGCTTGGTTGCTTGAAGAGGAATTGGCTGCTCCTCCTTGCTTCTTGAGCAGTAGGTCAAGCTTGGAGTTCATGGCAGTTTCTAGTTGCTCAAA[T/C]TTGGCATTCATGAGATGAWCAACTTGTTGAATCTGAGAAGCACCATGAACTGCTCTAGATTGACTCTCAACAAGACCATGTACTCTTCCCCTTTGAGGCT
Ro06-3757515	Ro06	3757515	T	A	TGAAGAGGAATTGGCTGCTCCTCCTTGCTTCTTGAGCAGTAGGTCAAGCTTGGAGTTCATGGCAGTTTCTAGTTGCTCAAAYTTGGCATTCATGAGATGA[T/A]CAACTTGTTGAATCTGAGAAGCACCATGAACTGCTCTAGATTGACTCTCAACAAGACCATGTACTCTTCCCCTTTGAGGCTTTACATCTCTTCCTTCACT
Ro06-3762906	Ro06	3762906	G	T	TATCATATTAATTGCTAGAAATAGAGTGCTCAATGCTGATTCGGCCTCCCCTAGCCCTATTGAGGTGCCTCTGAAAGGGTCTTTGGAATGCCCCCATTCC[G/T]AATAAAGTGAACATTTGTGCATASAAAGTTTGTTCCAATATCCTTCCTTCACGTTGCCAGCTTAGTGAGTATGGTGTTGATCTTGAARCCACCTGCCCAA
Ro06-3762930	Ro06	3762930	C	G	AGTGCTCAATGCTGATTCGGCCTCCCCTAGCCCTATTGAGGTGCCTCTGAAAGGGTCTTTGGAATGCCCCCATTCCKAATAAAGTGAACATTTGTGCATA[C/G]AAAGTTTGTTCCAATATCCTTCCTTCACGTTGCCAGCTTAGTGAGTATGGTGTTGATCTTGAARCCACCTGCCCAATTAATGTGTGAAAAAGTTGTTGAG
Ro06-3762994	Ro06	3762994	G	A	TGCCCCCATTCCKAATAAAGTGAACATTTGTGCATASAAAGTTTGTTCCAATATCCTTCCTTCACGTTGCCAGCTTAGTGAGTATGGTGTTGATCTTGAA[G/A]CCACCTGCCCAATTAATGTGTGAAAAAGTTGTTGAGACTCCAGAACATGCTCTACATGATTGTTCAATGGCAGCTGAAGCTTTGCATTTAATACCTTTTC
Ro06-3774903	Ro06	3774903	T	C	GGATGATAATACCATAACGGATTTGCTGACAAAGGTAATCCAGCCACCAGTGCTCCAAGGATCCCAACACATATAAAAAGCTGGTTTACAGATCCAAGTG[T/C]GCCCCGAATTTCAGTTGGGGAGATCTGACCGAGAGAAATAGTGTTGGTCAGTTGGTACATTAAAAATGCAAATCAAATATTATTATATGAACATTAATAG
Ro06-3805639	Ro06	3805639	T	C	ACCAATCCAGACCGAAGTACCTCGTCGGCACCATCTGATCCTCAGTGGTCTCCGCCACCGAAGTACCTCGTCGGCACCATCTGATCATACGAAATCTGAC[T/C]CGGAYGCTRGCARCATTTTCRGCCACTTCAGAGGATAAAATCGGTCGGGTTTTGTTCCTTTCCTCTCTAACAATCAATGTGTTTTGGCCAGAGGCATGTA
Ro06-3805644	Ro06	3805644	C	T	TCCAGACCGAAGTACCTCGTCGGCACCATCTGATCCTCAGTGGTCTCCGCCACCGAAGTACCTCGTCGGCACCATCTGATCATACGAAATCTGACYCGGA[C/T]GCTRGCARCATTTTCRGCCACTTCAGAGGATAAAATCGGTCGGGTTTTGTTCCTTTCCTCTCTAACAATCAATGTGTTTTGGCCAGAGGCATGTACCCGT
Ro06-3805648	Ro06	3805648	A	G	GACCGAAGTACCTCGTCGGCACCATCTGATCCTCAGTGGTCTCCGCCACCGAAGTACCTCGTCGGCACCATCTGATCATACGAAATCTGACYCGGAYGCT[A/G]GCARCATTTTCRGCCACTTCAGAGGATAAAATCGGTCGGGTTTTGTTCCTTTCCTCTCTAACAATCAATGTGTTTTGGCCAGAGGCATGTACCCGTCATA
Ro06-3805652	Ro06	3805652	A	G	GAAGTACCTCGTCGGCACCATCTGATCCTCAGTGGTCTCCGCCACCGAAGTACCTCGTCGGCACCATCTGATCATACGAAATCTGACYCGGAYGCTRGCA[A/G]CATTTTCRGCCACTTCAGAGGATAAAATCGGTCGGGTTTTGTTCCTTTCCTCTCTAACAATCAATGTGTTTTGGCCAGAGGCATGTACCCGTCATAGGAG
Ro06-3805660	Ro06	3805660	A	G	TCGTCGGCACCATCTGATCCTCAGTGGTCTCCGCCACCGAAGTACCTCGTCGGCACCATCTGATCATACGAAATCTGACYCGGAYGCTRGCARCATTTTC[A/G]GCCACTTCAGAGGATAAAATCGGTCGGGTTTTGTTCCTTTCCTCTCTAACAATCAATGTGTTTTGGCCAGAGGCATGTACCCGTCATAGGAGCATGCCGA
Ro06-3849989	Ro06	3849989	C	T	TGACTAGCCATGACCGCCGTTGGGTTCGCCATGTCGAGACGAAGAAGATGGGATACATGCGCCACCGTGAAGTGGCCGGAGAAGAAAGTCGGTGACGGGG[C/T]AGAGGAGAAAGACGAGTCGCGCGATGCTTCTGGGCTTTCTCCCAAACTGATCCAATCTTTAAACTGAATCCAACGGTTCAGATCAAACGGTGGTTTGATC
Ro06-3857459	Ro06	3857459	T	C	GCATGTACCTACTATGTCTCATCTCGATCCCCGAACCGCACAATATGATAAGTGAAGTGCGAAGAATTCTAGATCTACATAATGTAGCCTTATAATATGC[T/C]AKAYGSTTTTCTCTRATCTAACTAAAGTGACGAGATCACATATACCTGCTGCAAACATGCCTGCAAGAATAGATGTCCCAGTAGGATGCAAAGTCATTCT
Ro06-3857461	Ro06	3857461	G	T	ATGTACCTACTATGTCTCATCTCGATCCCCGAACCGCACAATATGATAAGTGAAGTGCGAAGAATTCTAGATCTACATAATGTAGCCTTATAATATGCYA[G/T]AYGSTTTTCTCTRATCTAACTAAAGTGACGAGATCACATATACCTGCTGCAAACATGCCTGCAAGAATAGATGTCCCAGTAGGATGCAAAGTCATTCTTG
Ro06-3857463	Ro06	3857463	T	C	GTACCTACTATGTCTCATCTCGATCCCCGAACCGCACAATATGATAAGTGAAGTGCGAAGAATTCTAGATCTACATAATGTAGCCTTATAATATGCYAKA[T/C]GSTTTTCTCTRATCTAACTAAAGTGACGAGATCACATATACCTGCTGCAAACATGCCTGCAAGAATAGATGTCCCAGTAGGATGCAAAGTCATTCTTGAA
Ro06-3857465	Ro06	3857465	G	C	ACCTACTATGTCTCATCTCGATCCCCGAACCGCACAATATGATAAGTGAAGTGCGAAGAATTCTAGATCTACATAATGTAGCCTTATAATATGCYAKAYG[G/C]TTTTCTCTRATCTAACTAAAGTGACGAGATCACATATACCTGCTGCAAACATGCCTGCAAGAATAGATGTCCCAGTAGGATGCAAAGTCATTCTTGAAGG
Ro06-3857474	Ro06	3857474	G	A	GTCTCATCTCGATCCCCGAACCGCACAATATGATAAGTGAAGTGCGAAGAATTCTAGATCTACATAATGTAGCCTTATAATATGCYAKAYGSTTTTCTCT[G/A]ATCTAACTAAAGTGACGAGATCACATATACCTGCTGCAAACATGCCTGCAAGAATAGATGTCCCAGTAGGATGCAAAGTCATTCTTGAAGGATGCAACGT
Ro06-3874328	Ro06	3874328	G	C	GTGTGTGCAATATTGTCATTTCAATGCACTAAAGTAAGCATGCATATTGAAATAGTGCTAACCATAAACTCACAGGATATTCACTCTGATTTTCACACAA[G/C]TGTTTATCGGTTAGCTAYACTACCACTCAARCAAACTTAYSCAAATGCCGCCATATGCTTGCACGTCAATCTWATCTCYACAAATCATACACATACATCT
Ro06-3874346	Ro06	3874346	C	T	TTTCAATGCACTAAAGTAAGCATGCATATTGAAATAGTGCTAACCATAAACTCACAGGATATTCACTCTGATTTTCACACAASTGTTTATCGGTTAGCTA[C/T]ACTACCACTCAARCAAACTTAYSCAAATGCCGCCATATGCTTGCACGTCAATCTWATCTCYACAAATCATACACATACATCTTAGATCAAAAGGACTTTT
Ro06-3874359	Ro06	3874359	A	G	AAGTAAGCATGCATATTGAAATAGTGCTAACCATAAACTCACAGGATATTCACTCTGATTTTCACACAASTGTTTATCGGTTAGCTAYACTACCACTCAA[A/G]CAAACTTAYSCAAATGCCGCCATATGCTTGCACGTCAATCTWATCTCYACAAATCATACACATACATCTTAGATCAAAAGGACTTTTATTCAGGTGGAAA
Ro06-3874368	Ro06	3874368	T	C	TGCATATTGAAATAGTGCTAACCATAAACTCACAGGATATTCACTCTGATTTTCACACAASTGTTTATCGGTTAGCTAYACTACCACTCAARCAAACTTA[T/C]SCAAATGCCGCCATATGCTTGCACGTCAATCTWATCTCYACAAATCATACACATACATCTTAGATCAAAAGGACTTTTATTCAGGTGGAAATGGAGCTTA
Ro06-3874369	Ro06	3874369	G	C	GCATATTGAAATAGTGCTAACCATAAACTCACAGGATATTCACTCTGATTTTCACACAASTGTTTATCGGTTAGCTAYACTACCACTCAARCAAACTTAY[G/C]CAAATGCCGCCATATGCTTGCACGTCAATCTWATCTCYACAAATCATACACATACATCTTAGATCAAAAGGACTTTTATTCAGGTGGAAATGGAGCTTAG
Ro06-3874401	Ro06	3874401	A	T	AGGATATTCACTCTGATTTTCACACAASTGTTTATCGGTTAGCTAYACTACCACTCAARCAAACTTAYSCAAATGCCGCCATATGCTTGCACGTCAATCT[A/T]ATCTCYACAAATCATACACATACATCTTAGATCAAAAGGACTTTTATTCAGGTGGAAATGGAGCTTAGGGCGAGGGGTTACATAAATGAAGTGGAAGGAA
Ro06-3874407	Ro06	3874407	C	T	TTCACTCTGATTTTCACACAASTGTTTATCGGTTAGCTAYACTACCACTCAARCAAACTTAYSCAAATGCCGCCATATGCTTGCACGTCAATCTWATCTC[C/T]ACAAATCATACACATACATCTTAGATCAAAAGGACTTTTATTCAGGTGGAAATGGAGCTTAGGGCGAGGGGTTACATAAATGAAGTGGAAGGAAATCACA
Ro06-3883990	Ro06	3883990	T	G	TTTAACAATATCCAAATGACCTAATTTCAAAAACTTGTCAACACGAAAGTTGTTCGTATCGACGAACTGAGTAAAACTAAGCAAAGACATGCTCCGGCGG[T/G]GGCCGGACGCGCCGCCACACGCCGTTGCCGGAGAMGGGCGSYGCCGCCGTCAAYCTTCTCCGATCGTCATGAAATTTTAACAGCATGATCTACACAACAA
Ro06-3884025	Ro06	3884025	A	C	TGTCAACACGAAAGTTGTTCGTATCGACGAACTGAGTAAAACTAAGCAAAGACATGCTCCGGCGGKGGCCGGACGCGCCGCCACACGCCGTTGCCGGAGA[A/C]GGGCGSYGCCGCCGTCAAYCTTCTCCGATCGTCATGAAATTTTAACAGCATGATCTACACAACAAGTCCAACAATAATCATAACTACCTCAAAGTCATAC
Ro06-3884031	Ro06	3884031	G	C	CACGAAAGTTGTTCGTATCGACGAACTGAGTAAAACTAAGCAAAGACATGCTCCGGCGGKGGCCGGACGCGCCGCCACACGCCGTTGCCGGAGAMGGGCG[G/C]YGCCGCCGTCAAYCTTCTCCGATCGTCATGAAATTTTAACAGCATGATCTACACAACAAGTCCAACAATAATCATAACTACCTCAAAGTCATACTCTGAC
Ro06-3884032	Ro06	3884032	C	T	ACGAAAGTTGTTCGTATCGACGAACTGAGTAAAACTAAGCAAAGACATGCTCCGGCGGKGGCCGGACGCGCCGCCACACGCCGTTGCCGGAGAMGGGCGS[C/T]GCCGCCGTCAAYCTTCTCCGATCGTCATGAAATTTTAACAGCATGATCTACACAACAAGTCCAACAATAATCATAACTACCTCAAAGTCATACTCTGACC
Ro06-3884044	Ro06	3884044	C	T	CGTATCGACGAACTGAGTAAAACTAAGCAAAGACATGCTCCGGCGGKGGCCGGACGCGCCGCCACACGCCGTTGCCGGAGAMGGGCGSYGCCGCCGTCAA[C/T]CTTCTCCGATCGTCATGAAATTTTAACAGCATGATCTACACAACAAGTCCAACAATAATCATAACTACCTCAAAGTCATACTCTGACCGGAAGGGGTCGG
Ro06-3934710	Ro06	3934710	G	A	ACAATCAAGCTTGCCATACGGTTACACACAATTAAGTATTTCAAGAGTGCACTAAACATAATAAACTAGAATCTCACTTGTGAGTCATTGGCACCTCTTT[G/A]CAGCTAGTTGGCTGACTTTCTCASAAAGCCGTGCACCAAAGCCRTGCAYCAATCACGCTTGTGTTTCGTCTTACCAAACTCTCAATGCTTAAGCCTATCA
Ro06-3934734	Ro06	3934734	G	C	CACACAATTAAGTATTTCAAGAGTGCACTAAACATAATAAACTAGAATCTCACTTGTGAGTCATTGGCACCTCTTTRCAGCTAGTTGGCTGACTTTCTCA[G/C]AAAGCCGTGCACCAAAGCCRTGCAYCAATCACGCTTGTGTTTCGTCTTACCAAACTCTCAATGCTTAAGCCTATCACATGGTACACATGTAGAGGACTGC
Ro06-3934754	Ro06	3934754	A	G	GAGTGCACTAAACATAATAAACTAGAATCTCACTTGTGAGTCATTGGCACCTCTTTRCAGCTAGTTGGCTGACTTTCTCASAAAGCCGTGCACCAAAGCC[A/G]TGCAYCAATCACGCTTGTGTTTCGTCTTACCAAACTCTCAATGCTTAAGCCTATCACATGGTACACATGTAGAGGACTGCTAAGAGCCTTTTAATATTTC
Ro06-3934759	Ro06	3934759	T	C	CACTAAACATAATAAACTAGAATCTCACTTGTGAGTCATTGGCACCTCTTTRCAGCTAGTTGGCTGACTTTCTCASAAAGCCGTGCACCAAAGCCRTGCA[T/C]CAATCACGCTTGTGTTTCGTCTTACCAAACTCTCAATGCTTAAGCCTATCACATGGTACACATGTAGAGGACTGCTAAGAGCCTTTTAATATTTCCAAGG
Ro06-3982431	Ro06	3982431	A	G	ACTGAGAGAGAGACTCATTAAATAAGCACTCATATTTTACATGTAGCACCACCGTAGACTCCTCTTTTGGTTGTTTTTGGTCATTTTGCAAATACAGAAC[A/G]CCAACACCATATTTGTTTTGGCAACTTTATTAATCGATTTGGTTGATATTCTCATGCGTATAGGCTTTACACAAGAAGTCATCAAGATCGTATCATATGG
Ro06-3985079	Ro06	3985079	A	T	TTTTTATTTAATGACGGAAGCCTGTCAGAAGATAAATCTAAGCTGTTAATCTGCATACGATCTTCATTGCTTCCTGTAAGATTGGGTGATGATCTTTGGT[A/T]AGAACTATATTACCYAAATAGATTTGCTCGTYAATTTGGTTTTGACCAAGGGGTTCCCTCAAACAAACTCYGATTTGGTATTGAAAAAAGAYGAAAATGT
Ro06-3985094	Ro06	3985094	C	T	GGAAGCCTGTCAGAAGATAAATCTAAGCTGTTAATCTGCATACGATCTTCATTGCTTCCTGTAAGATTGGGTGATGATCTTTGGTWAGAACTATATTACC[C/T]AAATAGATTTGCTCGTYAATTTGGTTTTGACCAAGGGGTTCCCTCAAACAAACTCYGATTTGGTATTGAAAAAAGAYGAAAATGTTGTATTGAAGATCTA
Ro06-3985111	Ro06	3985111	C	T	TAAATCTAAGCTGTTAATCTGCATACGATCTTCATTGCTTCCTGTAAGATTGGGTGATGATCTTTGGTWAGAACTATATTACCYAAATAGATTTGCTCGT[C/T]AATTTGGTTTTGACCAAGGGGTTCCCTCAAACAAACTCYGATTTGGTATTGAAAAAAGAYGAAAATGTTGTATTGAAGATCTAGCAAAAGCGCAACGCAT
Ro06-3985150	Ro06	3985150	C	T	TCCTGTAAGATTGGGTGATGATCTTTGGTWAGAACTATATTACCYAAATAGATTTGCTCGTYAATTTGGTTTTGACCAAGGGGTTCCCTCAAACAAACTC[C/T]GATTTGGTATTGAAAAAAGAYGAAAATGTTGTATTGAAGATCTAGCAAAAGCGCAACGCATGCTTCTGAGAACTGGCATTGGTACGCGTTTTTATATCCC
Ro06-3985171	Ro06	3985171	C	T	TCTTTGGTWAGAACTATATTACCYAAATAGATTTGCTCGTYAATTTGGTTTTGACCAAGGGGTTCCCTCAAACAAACTCYGATTTGGTATTGAAAAAAGA[C/T]GAAAATGTTGTATTGAAGATCTAGCAAAAGCGCAACGCATGCTTCTGAGAACTGGCATTGGTACGCGTTTTTATATCCCTCGTTCTACTTACAATAGGAC
Ro06-3994408	Ro06	3994408	G	A	GTTTTTAAATAAATATGTGCATGCAATAAATTGTTTTATTATTATTTCTAGCATGATTCTTCATTATTTAATAGTTCGAGGTGTGAGAATAACCTATGTT[G/A]CCAGTACCGAGCCACCTCAGTAGAATCAGTGTGTTAGGGTACACCCTCAGCTCATCCAGTATCTATTAGGGTATACCCCCAKCAGTTCAGTTTATGAGAG
Ro06-3994490	Ro06	3994490	G	T	GTGAGAATAACCTATGTTRCCAGTACCGAGCCACCTCAGTAGAATCAGTGTGTTAGGGTACACCCTCAGCTCATCCAGTATCTATTAGGGTATACCCCCA[G/T]CAGTTCAGTTTATGAGAGTGCACTCCTCAGAGATCCGGATCGCAGTGTATAGCTCAGTTAGACATGCATGCAACATCTAGTCGGCAGACCCCTCTAGATG
Ro06-4002518	Ro06	4002518	A	T	GAGGACTTAGCTAGGCGACAGGCCTAGCCGTACTGTGAGTGGACATTTGTTTTTAAATAAATATGTGCATGCAATAAATTGTTTTATTATTATTTCTAGC[A/T]TGATTCTTCATTATTTAATAGTTCAAGGTGTGAGAATAACMTATGTTGCCAGTACCGAGCCACCTCAGTAGAATCAGTGTGTTAGGGTACACCCTCAGCT
Ro06-4002559	Ro06	4002559	C	A	GACATTTGTTTTTAAATAAATATGTGCATGCAATAAATTGTTTTATTATTATTTCTAGCWTGATTCTTCATTATTTAATAGTTCAAGGTGTGAGAATAAC[C/A]TATGTTGCCAGTACCGAGCCACCTCAGTAGAATCAGTGTGTTAGGGTACACCCTCAGCTCATCCAGTATCTATTAGGGTATACCCCCAGCAGTTCAGTTT
Ro06-4002733	Ro06	4002733	C	T	TAGGGTATACCCCCAGCAGTTCAGTTTATGAGAGTGCACTCCTCAGAGATCCGGATCGCAGTGTATAGCTCAGTTAGACATGCATGCAACATCTAGTCGG[C/T]AGACCCCTTTAGATGTATATCACCTGGTCGGCAGATCCCTCTGGGTGATCACCTAGTCGGCAGATCCCCTCTAGGTTATCTGGTCGGCAGATCCCTCCAG
Ro06-4004199	Ro06	4004199	G	A	GTGCTTGTTTCACCCACCGTTTCTCATTTGACACCGCCAACTTGTGAACGGCCACTCTTGGATCTAACCCAGGCATGTCTTGATATCCCCAAGCAAAAAC[G/A]TCCATATATTCCTCCAAKAGACCTKTATAATCTTGCAATTCATCYGAAGTTAAAAGGGYACTTACAAATATAAGCTTTGGGTYGTCAGTYGTGCCAAGGC
Ro06-4004217	Ro06	4004217	G	T	GTTTCTCATTTGACACCGCCAACTTGTGAACGGCCACTCTTGGATCTAACCCAGGCATGTCTTGATATCCCCAAGCAAAAACRTCCATATATTCCTCCAA[G/T]AGACCTKTATAATCTTGCAATTCATCYGAAGTTAAAAGGGYACTTACAAATATAAGCTTTGGGTYGTCAGTYGTGCCAAGGCTTATTTCTTGAGGATCAT
Ro06-4004224	Ro06	4004224	T	G	ATTTGACACCGCCAACTTGTGAACGGCCACTCTTGGATCTAACCCAGGCATGTCTTGATATCCCCAAGCAAAAACRTCCATATATTCCTCCAAKAGACCT[T/G]TATAATCTTGCAATTCATCYGAAGTTAAAAGGGYACTTACAAATATAAGCTTTGGGTYGTCAGTYGTGCCAAGGCTTATTTCTTGAGGATCATCAACAGT
Ro06-4004244	Ro06	4004244	T	C	GAACGGCCACTCTTGGATCTAACCCAGGCATGTCTTGATATCCCCAAGCAAAAACRTCCATATATTCCTCCAAKAGACCTKTATAATCTTGCAATTCATC[T/C]GAAGTTAAAAGGGYACTTACAAATATAAGCTTTGGGTYGTCAGTYGTGCCAAGGCTTATTTCTTGAGGATCATCAACAGTCGCTTGACCTTCATCTTCCA
Ro06-4004258	Ro06	4004258	C	T	GGATCTAACCCAGGCATGTCTTGATATCCCCAAGCAAAAACRTCCATATATTCCTCCAAKAGACCTKTATAATCTTGCAATTCATCYGAAGTTAAAAGGG[C/T]ACTTACAAATATAAGCTTTGGGTYGTCAGTYGTGCCAAGGCTTATTTCTTGAGGATCATCAACAGTCGCTTGACCTTCATCTTCCATTTTTGGTGGAGCA
Ro06-4004282	Ro06	4004282	C	T	TATCCCCAAGCAAAAACRTCCATATATTCCTCCAAKAGACCTKTATAATCTTGCAATTCATCYGAAGTTAAAAGGGYACTTACAAATATAAGCTTTGGGT[C/T]GTCAGTYGTGCCAAGGCTTATTTCTTGAGGATCATCAACAGTCGCTTGACCTTCATCTTCCATTTTTGGTGGAGCAGGGTGAGCATTGCTCCTGTTCATT
Ro06-4004289	Ro06	4004289	C	T	AAGCAAAAACRTCCATATATTCCTCCAAKAGACCTKTATAATCTTGCAATTCATCYGAAGTTAAAAGGGYACTTACAAATATAAGCTTTGGGTYGTCAGT[C/T]GTGCCAAGGCTTATTTCTTGAGGATCATCAACAGTCGCTTGACCTTCATCTTCCATTTTTGGTGGAGCAGGGTGAGCATTGCTCCTGTTCATTTTGACTT
Ro06-4005472	Ro06	4005472	C	T	ATCACATGGAATAGAGCGTCTGAAAATAATTCTCTGATCTCCATTTGTAATGCTATAGTATTGCCTTTTGACCAGTTTGGTTGAAACCTTGAATTGTGAG[C/T]ATGGATGGYGAAASCTGTTTGGCCCCCATTCCCATAATGTGGAGCGTTTTGAGTGGTAACAGATTCACAGCCGAACCACAATCAAGCAAAATCATGTTGA
Ro06-4005481	Ro06	4005481	C	T	AATAGAGCGTCTGAAAATAATTCTCTGATCTCCATTTGTAATGCTATAGTATTGCCTTTTGACCAGTTTGGTTGAAACCTTGAATTGTGAGYATGGATGG[C/T]GAAASCTGTTTGGCCCCCATTCCCATAATGTGGAGCGTTTTGAGTGGTAACAGATTCACAGCCGAACCACAATCAAGCAAAATCATGTTGATTGTCGTGT
Ro06-4005486	Ro06	4005486	G	C	AGCGTCTGAAAATAATTCTCTGATCTCCATTTGTAATGCTATAGTATTGCCTTTTGACCAGTTTGGTTGAAACCTTGAATTGTGAGYATGGATGGYGAAA[G/C]CTGTTTGGCCCCCATTCCCATAATGTGGAGCGTTTTGAGTGGTAACAGATTCACAGCCGAACCACAATCAAGCAAAATCATGTTGATTGTCGTGTTRCCT
Ro06-4005583	Ro06	4005583	G	A	AAASCTGTTTGGCCCCCATTCCCATAATGTGGAGCGTTTTGAGTGGTAACAGATTCACAGCCGAACCACAATCAAGCAAAATCATGTTGATTGTCGTGTT[G/A]CCTACAAGTCCCRTAACATATAAGGGCMTGTTGTGGTATTCATGTCCCAACATGAGATCTTCTTCATTGAATGTGATACATGCCCTACAGTTGGCACAGA
Ro06-4005596	Ro06	4005596	G	A	CCCCATTCCCATAATGTGGAGCGTTTTGAGTGGTAACAGATTCACAGCCGAACCACAATCAAGCAAAATCATGTTGATTGTCGTGTTRCCTACAAGTCCC[G/A]TAACATATAAGGGCMTGTTGTGGTATTCATGTCCCAACATGAGATCTTCTTCATTGAATGTGATACATGCCCTACAGTTGGCACAGACCCTAGGCGTGGT
Ro06-4005611	Ro06	4005611	A	C	GTGGAGCGTTTTGAGTGGTAACAGATTCACAGCCGAACCACAATCAAGCAAAATCATGTTGATTGTCGTGTTRCCTACAAGTCCCRTAACATATAAGGGC[A/C]TGTTGTGGTATTCATGTCCCAACATGAGATCTTCTTCATTGAATGTGATACATGCCCTACAGTTGGCACAGACCCTAGGCGTGGTCATGGCAACCTCTGC
Ro06-4068547	Ro06	4068547	C	G	GAATATGCTTGATGATTTTACTTCTGGATATGTTCATTGTGTAAATGCAGTTTTGTTTGATGCTTGGTTAGGAACGTAACTAATTCTTAAGCATGTGTTA[C/G]ACTTAACTTGTTAGGATTTTATGGTAGTTACATTTTATCCTATGTGTTTAATTTTGAGTATAATGAGCTTAAGTAAAGGAGCTTAACTTGTTTGAATCTT
Ro06-4079582	Ro06	4079582	A	C	CAGACAGAGATGCACGTTTCACTTCAAGATTTTGGAGCAGTTTCCAGAAAGCATTGGGAATTACTTTAGATATGAGTACAACATTTCATCCTCAGACCGA[A/C]GGGCAGACTGAACGGGTGAATCAAGTGATGGAAGATATGTTGAGAGCATGCATCTTGGACTTCAAATGAAGTTAGGAGGATCATCTGTCATTGATCGAAT
Ro06-4124638	Ro06	4124638	T	A	ACTTGATAAATTTGCCCATTCAACACCTCTTGTTGAATGGTGGCTGAATAGTATTGGCATTCAATGGTCTCATGCTCCATGGAACCACAATATGAGCATG[T/A]AACAGCCACTRCCTTGACTTGCTCACTTGGATGAGGRGGAGCTGCATTGCCATATGCCTTGAGCAAGAGATCAAGCTTGGTGTTCATGGCAGCCTCTAGT
Ro06-4124649	Ro06	4124649	G	A	TTGCCCATTCAACACCTCTTGTTGAATGGTGGCTGAATAGTATTGGCATTCAATGGTCTCATGCTCCATGGAACCACAATATGAGCATGWAACAGCCACT[G/A]CCTTGACTTGCTCACTTGGATGAGGRGGAGCTGCATTGCCATATGCCTTGAGCAAGAGATCAAGCTTGGTGTTCATGGCAGCCTCTAGTTGCTCAAACTT
Ro06-4124675	Ro06	4124675	G	A	TGGTGGCTGAATAGTATTGGCATTCAATGGTCTCATGCTCCATGGAACCACAATATGAGCATGWAACAGCCACTRCCTTGACTTGCTCACTTGGATGAGG[G/A]GGAGCTGCATTGCCATATGCCTTGAGCAAGAGATCAAGCTTGGTGTTCATGGCAGCCTCTAGTTGCTCAAACTTGGCATTCATAAGATCATCCACTTGTT
Ro06-4133200	Ro06	4133200	C	T	TCTATTAAGTGATGGAGGAAGAGAAAACAAAGGAAAAGAAATACAAAGAGTGAGAAGATGAGGTGGAAAAGAGAGACAAGGTGAAGTGGAGTGAGATTAA[C/T]GGAGTGATGGACTTGATTCTTACATATGATTGMTGCAGCTGCACATGTGTGTAGCTGGTCTTGTGTCTCACCACTATGGGTGGTGGTTGGTAGTGGTTGT
Ro06-4133233	Ro06	4133233	A	C	AAAAGAAATACAAAGAGTGAGAAGATGAGGTGGAAAAGAGAGACAAGGTGAAGTGGAGTGAGATTAAYGGAGTGATGGACTTGATTCTTACATATGATTG[A/C]TGCAGCTGCACATGTGTGTAGCTGGTCTTGTGTCTCACCACTATGGGTGGTGGTTGGTAGTGGTTGTCTGACGGTTGAGCCACCTCTCGTGGTGGTTTGC
Ro06-4182609	Ro06	4182609	A	C	CACATGTTCAGAGCTGATATATGTTATAGTACACTAACAGTATTTGATGGATTATTTTTCTAATTTTCAAGAATGAAATTGGTTTTGCATGCTTACATCT[A/C]ATTTATTTTGTAGCTTGTAAAGCAAGTTTCTGAGATGGACCAGATGAGGAAAACTATWCTGAAGAAAGCCTTTAATTTAATTGATAAAAATGTAAGTAAT
Ro06-4182667	Ro06	4182667	T	A	TCTAATTTTCAAGAATGAAATTGGTTTTGCATGCTTACATCTMATTTATTTTGTAGCTTGTAAAGCAAGTTTCTGAGATGGACCAGATGAGGAAAACTAT[T/A]CTGAAGAAAGCCTTTAATTTAATTGATAAAAATGTAAGTAATGRTGTTTCTTACTTATTGGATCTTCCTAAGGATCCTTTCTATTAAGACTTGCCTAATC
Ro06-4182711	Ro06	4182711	G	A	TTTATTTTGTAGCTTGTAAAGCAAGTTTCTGAGATGGACCAGATGAGGAAAACTATWCTGAAGAAAGCCTTTAATTTAATTGATAAAAATGTAAGTAATG[G/A]TGTTTCTTACTTATTGGATCTTCCTAAGGATCCTTTCTATTAAGACTTGCCTAATCTATTCCATACAGAGATAAGAGGTATGAGAATTGTCGCTATCTTT
Ro06-4186721	Ro06	4186721	T	A	TTAATTTATTTAGGAACGAACATGTTTTGAATTGATTCAACTGCATTCACAATTCACAATTCACAATTCACAATTCACTGGTTTAACATCTTGTAATTTT[T/A]TTTTATGTGCTCGTTCTCATGAAAAGATGATTTATTAACTACTTGATTAAAATAGAAAGTTGTAGACAAGAAAGCRTAKTTTTAATTAATAATTGGACCA
Ro06-4186797	Ro06	4186797	G	A	ACTGGTTTAACATCTTGTAATTTTWTTTTATGTGCTCGTTCTCATGAAAAGATGATTTATTAACTACTTGATTAAAATAGAAAGTTGTAGACAAGAAAGC[G/A]TAKTTTTAATTAATAATTGGACCAAAAAGGTTCTTGGGAGGGAGATCTGCATTCAATCCAAACTCATAAAGGAAGTACTACTCATTATGACAAAACTGCA
Ro06-4186800	Ro06	4186800	G	T	GGTTTAACATCTTGTAATTTTWTTTTATGTGCTCGTTCTCATGAAAAGATGATTTATTAACTACTTGATTAAAATAGAAAGTTGTAGACAAGAAAGCRTA[G/T]TTTTAATTAATAATTGGACCAAAAAGGTTCTTGGGAGGGAGATCTGCATTCAATCCAAACTCATAAAGGAAGTACTACTCATTATGACAAAACTGCATGG
Ro06-4218188	Ro06	4218188	C	A	CACAAAACCGACCACCGCCGCGCCACCAAAAACCAACACCATCACCTTGATCTGCCATAGAACAGACTTAGGCCAAACGCTTGCCTTGAGACGACCCCTA[C/A]RGGGGCGGAGCCACCATAACATGCCGATCACTAGAATCCAAATGGCCAAGTCCAGCAGACAGAAGTGCCAAAGCAGAGGACGATTAGAACCACAGAGGAT
Ro06-4218189	Ro06	4218189	G	A	ACAAAACCGACCACCGCCGCGCCACCAAAAACCAACACCATCACCTTGATCTGCCATAGAACAGACTTAGGCCAAACGCTTGCCTTGAGACGACCCCTAM[G/A]GGGGCGGAGCCACCATAACATGCCGATCACTAGAATCCAAATGGCCAAGTCCAGCAGACAGAAGTGCCAAAGCAGAGGACGATTAGAACCACAGAGGATC
Ro06-4235249	Ro06	4235249	A	C	GCTTGATTGATATACGGTGATTGATACATATCTAAATGCATATTACTAATGATATATTCTGATGCATCATGACATGTAGAAGGATGCATAGTTGGGGATG[A/C]ATTTGATTATGATTGAGGAAGGTGGATGRATATRRAAAGAATGGATTATATTRGAAATAGWTTTTGTRTAGTTGAGTCTGACTCRTAGGGACCAGATWTC
Ro06-4235278	Ro06	4235278	G	A	ATCTAAATGCATATTACTAATGATATATTCTGATGCATCATGACATGTAGAAGGATGCATAGTTGGGGATGMATTTGATTATGATTGAGGAAGGTGGATG[G/A]ATATRRAAAGAATGGATTATATTRGAAATAGWTTTTGTRTAGTTGAGTCTGACTCRTAGGGACCAGATWTCATGTKKGCTAATAGAGCTGTGCGGAACTG
Ro06-4235283	Ro06	4235283	A	G	AATGCATATTACTAATGATATATTCTGATGCATCATGACATGTAGAAGGATGCATAGTTGGGGATGMATTTGATTATGATTGAGGAAGGTGGATGRATAT[A/G]RAAAGAATGGATTATATTRGAAATAGWTTTTGTRTAGTTGAGTCTGACTCRTAGGGACCAGATWTCATGTKKGCTAATAGAGCTGTGCGGAACTGGTGAT
Ro06-4235284	Ro06	4235284	A	G	ATGCATATTACTAATGATATATTCTGATGCATCATGACATGTAGAAGGATGCATAGTTGGGGATGMATTTGATTATGATTGAGGAAGGTGGATGRATATR[A/G]AAAGAATGGATTATATTRGAAATAGWTTTTGTRTAGTTGAGTCTGACTCRTAGGGACCAGATWTCATGTKKGCTAATAGAGCTGTGCGGAACTGGTGATC
Ro06-4235302	Ro06	4235302	G	A	ATATTCTGATGCATCATGACATGTAGAAGGATGCATAGTTGGGGATGMATTTGATTATGATTGAGGAAGGTGGATGRATATRRAAAGAATGGATTATATT[G/A]GAAATAGWTTTTGTRTAGTTGAGTCTGACTCRTAGGGACCAGATWTCATGTKKGCTAATAGAGCTGTGCGGAACTGGTGATCGAGGTCGGACAAAAGATG
Ro06-4235310	Ro06	4235310	A	T	ATGCATCATGACATGTAGAAGGATGCATAGTTGGGGATGMATTTGATTATGATTGAGGAAGGTGGATGRATATRRAAAGAATGGATTATATTRGAAATAG[A/T]TTTTGTRTAGTTGAGTCTGACTCRTAGGGACCAGATWTCATGTKKGCTAATAGAGCTGTGCGGAACTGGTGATCGAGGTCGGACAAAAGATGACTAGCAA
Ro06-4235317	Ro06	4235317	G	A	ATGACATGTAGAAGGATGCATAGTTGGGGATGMATTTGATTATGATTGAGGAAGGTGGATGRATATRRAAAGAATGGATTATATTRGAAATAGWTTTTGT[G/A]TAGTTGAGTCTGACTCRTAGGGACCAGATWTCATGTKKGCTAATAGAGCTGTGCGGAACTGGTGATCGAGGTCGGACAAAAGATGACTAGCAAAATGGAT
Ro06-4235334	Ro06	4235334	G	A	GCATAGTTGGGGATGMATTTGATTATGATTGAGGAAGGTGGATGRATATRRAAAGAATGGATTATATTRGAAATAGWTTTTGTRTAGTTGAGTCTGACTC[G/A]TAGGGACCAGATWTCATGTKKGCTAATAGAGCTGTGCGGAACTGGTGATCGAGGTCGGACAAAAGATGACTAGCAAAATGGATATGTGGGTTGAATTGTT
Ro06-4235347	Ro06	4235347	T	A	TGMATTTGATTATGATTGAGGAAGGTGGATGRATATRRAAAGAATGGATTATATTRGAAATAGWTTTTGTRTAGTTGAGTCTGACTCRTAGGGACCAGAT[T/A]TCATGTKKGCTAATAGAGCTGTGCGGAACTGGTGATCGAGGTCGGACAAAAGATGACTAGCAAAATGGATATGTGGGTTGAATTGTTACGGGTGTTAGAT
Ro06-4235354	Ro06	4235354	G	T	GATTATGATTGAGGAAGGTGGATGRATATRRAAAGAATGGATTATATTRGAAATAGWTTTTGTRTAGTTGAGTCTGACTCRTAGGGACCAGATWTCATGT[G/T]KGCTAATAGAGCTGTGCGGAACTGGTGATCGAGGTCGGACAAAAGATGACTAGCAAAATGGATATGTGGGTTGAATTGTTACGGGTGTTAGATCATATAA
Ro06-4235355	Ro06	4235355	G	T	ATTATGATTGAGGAAGGTGGATGRATATRRAAAGAATGGATTATATTRGAAATAGWTTTTGTRTAGTTGAGTCTGACTCRTAGGGACCAGATWTCATGTK[G/T]GCTAATAGAGCTGTGCGGAACTGGTGATCGAGGTCGGACAAAAGATGACTAGCAAAATGGATATGTGGGTTGAATTGTTACGGGTGTTAGATCATATAAG
Ro06-4236096	Ro06	4236096	G	A	TAGTATGAACTGCTAGTCAATTAACGTTTGTGTAGGAATGCCAATATTCAATATACTAACAGAAACTTCCCGGTCAGATGATTGGTCATGACTAGGTCCA[G/A]GTTCTTGGATCTGAGCTATTTTGAATAGTGCCGAGATCAACAATCCAGATGGCCTCTTTCTATTTTCTTTCATTTAAATAATTTTCTTTATTTCCAAACG
Ro06-4251509	Ro06	4251509	A	G	ATTCTTCTAGGCCTATTTTGTTCCTTATTAGGGTCACAAATACTCCTAGTCCATTTATCCAAGCCTTGTTAGGGTCTCAAACAAACTTCCTAGGCATAGA[A/G]TTCCAAGAATCAGGATTCAAACAAGCCAAGCTTCTTTACTTAAACTCAACATGCTCAAAGTTAAACACATAGGATAATATGTAACTAGCATAAAATCCTA
Ro06-4289754	Ro06	4289754	C	T	GTTCTAGGATGGATTCTTCTAGGCCTATTTTTTGCCTTATTAGGGTCACAAATACTCCTAGTACATTTATCCAAGCCTTGTTAGGGTCTCAAACAAACTT[C/T]CTAGGCATAGAGTTTCAAGAATCAAGATTCAAACAAGTTCGATCAGTTCCTTAACTTAAACTCATCATGCTCAAAGTTAAACACCTAGGATAATATGTAA
Ro06-4292271	Ro06	4292271	C	T	CAACGATCTCTTCTTATATTAAACCAGAGACAACACAATATGGTTTCCAGCATCTCCGAATTGATTTTGAATGTCAAATTCTACAGAGTTGCTTCAGCTC[C/T]RGGGAAGGTGCTGTTGACCGGAGGGTACCTAATTCTGGAGAGACCCAATGCAGGGCTCGTGCTCATCACCAACGCATGCTTCTTCGCCATTGTCAAACCT
Ro06-4292272	Ro06	4292272	G	A	AACGATCTCTTCTTATATTAAACCAGAGACAACACAATATGGTTTCCAGCATCTCCGAATTGATTTTGAATGTCAAATTCTACAGAGTTGCTTCAGCTCY[G/A]GGGAAGGTGCTGTTGACCGGAGGGTACCTAATTCTGGAGAGACCCAATGCAGGGCTCGTGCTCATCACCAACGCATGCTTCTTCGCCATTGTCAAACCTC
Ro06-4292774	Ro06	4292774	A	T	GGATCACCAACAAGAACACCATGACCCTTTGGTCTCCTTCCAATTTCCAAACTCTGAATTGAGCAAACCAAGCATTAATACGGAAGGAATGGACTTGAAT[A/T]ARTCGAAACCACCAATGATCACAGTTGCTTCACAGTGGYAGCGCAACACCCAGAAAACCAAATCTCCAAAMTTTAACCAAAAGTGAATTTTGAGGCTAGA
Ro06-4292776	Ro06	4292776	A	G	ATCACCAACAAGAACACCATGACCCTTTGGTCTCCTTCCAATTTCCAAACTCTGAATTGAGCAAACCAAGCATTAATACGGAAGGAATGGACTTGAATWA[A/G]TCGAAACCACCAATGATCACAGTTGCTTCACAGTGGYAGCGCAACACCCAGAAAACCAAATCTCCAAAMTTTAACCAAAAGTGAATTTTGAGGCTAGAAA
Ro06-4292813	Ro06	4292813	T	C	CCAATTTCCAAACTCTGAATTGAGCAAACCAAGCATTAATACGGAAGGAATGGACTTGAATWARTCGAAACCACCAATGATCACAGTTGCTTCACAGTGG[T/C]AGCGCAACACCCAGAAAACCAAATCTCCAAAMTTTAACCAAAAGTGAATTTTGAGGCTAGAAACATGTAAAGCTCGAAGAGCTGATGAGGTTACATAATT
Ro06-4292845	Ro06	4292845	A	C	GCATTAATACGGAAGGAATGGACTTGAATWARTCGAAACCACCAATGATCACAGTTGCTTCACAGTGGYAGCGCAACACCCAGAAAACCAAATCTCCAAA[A/C]TTTAACCAAAAGTGAATTTTGAGGCTAGAAACATGTAAAGCTCGAAGAGCTGATGAGGTTACATAATTGAGTCGAAGAAAACAGTGACCGGAGTCGCCGG
Ro06-4293004	Ro06	4293004	G	A	TTACATAATTGAGTCGAAGAAAACAGTGACCGGAGTCGCCGGAAATCACTGAAAAAGACGCCGGACCACCAAACCTTTCTTCCTACAATTCTCTCTCTAC[G/A]GTCGCCAGCTTGACGAGATACGACTACCAATGGGTTCGTATCACCGAGAGTAAGATTTTGGCCATTTTCGTGCGGTCAAACTGACGGACGATGAGGTTGA
Ro06-4317508	Ro06	4317508	C	G	TGAAATTGATGGCTTTTGGTGATGGCCTCAACATCATGCATGCTGCTACGGAGCTTTGCTTTCCCTAAGGGACGAATCTCAAGAGTCAATTTGCTGTCTC[C/G]GTGCTCTTGCTCTGATCGTTAACGAGATTGCTTTCTTACCATAAATTTTGAGATACAAATTTGTCATAGATCACGAATCAGTATAGTCTCTTCAAAGCCT
Ro06-4333532	Ro06	4333532	C	T	AGGGTCAAAAGAACTCTCCGCAAAGGGATAGAAATAAAGGAGTCAAACATGCTCATCATATATATTGCCCATTACCTACAGAAGAGTAAAGTGGCCAAAC[C/T]ATACACCCTCATACAAGATAGATCAGATGCATACCAAAGAGTGGTTAATTCCTCAAATACACATCCAATACATATTAGATTAGACAACACATATATTCAT
Ro06-4352608	Ro06	4352608	A	C	TCTTCCCAATGGTTTGGTAAAAACATCCGCTATCTGGTCTCTGGAAGGAACATATGCAGTTTGGATTAAACCACTCTGAAGTTTCTCACGAACAACATGG[A/C]AATCCTACTCAATATGTTTGGTTCTTTCATGGAACACTGGATTGGCAGCAATATGTATTGCAGCTTTGTTGTCGCAATAAAGTGTACTAGCAGCAGCATG
Ro06-4401879	Ro06	4401879	G	A	AAAAATAAGCAGACTAATCACCATCTTCCCTCTGCAAATTTTAGACTAACATCACATCATTACCTCTTAAATTTACCTACTTCCTCAATAACTGAGATCA[G/A]TTAAAGTATTCAAGGACTTGTATTCGTGACCTCATAGTATTTTAACTTTAAATGCAATGACAGACCAACATTTTTTGTMAGAAGCATGTTACATGAAGTT
Ro06-4401958	Ro06	4401958	A	C	CTTCCTCAATAACTGAGATCARTTAAAGTATTCAAGGACTTGTATTCGTGACCTCATAGTATTTTAACTTTAAATGCAATGACAGACCAACATTTTTTGT[A/C]AGAAGCATGTTACATGAAGTTTGATCTTTGTTTCCTTATATAAAGTCCATATCATCCACAGTTCACAAATGGGAAAACATACAACATCAAAGCTTTATAC
Ro06-4413565	Ro06	4413565	C	T	TCACTGACTACAACAAACCCGCACAGGCCGTGAATCCAAAAATACAAAATCTCCAAAACTCAACCAAATTTGAAAACTAAGGATACAAGCATGTAGAGTA[C/T]GACGAGGGGAAAAGGTTTGATACCTAACTTGCCGCCGTTCATGGCCGGAAATGCCGGAAATCATAAAAACCCGCCAGAAAAGCCAAGAAGCTTTGAAGCT
Ro06-4435643	Ro06	4435643	C	T	GCTAATTGCCACGCTAGCAACATGTCACAAGACTAGGCACAAAGAGACCAGGTCATTGCCCCAGGTTGGATTTTGATTGGGCAGAACGAGACCGGTGGAC[C/T]AAATTTTTAAGCCCARCARGGCTACATCTAGGTGCCAACCGGTCTAAACTCCACCAGTGGACTTTCTCTAAGAGAGGAGAATAATAGAGGGTTAAGATCA
Ro06-4435659	Ro06	4435659	A	G	GCAACATGTCACAAGACTAGGCACAAAGAGACCAGGTCATTGCCCCAGGTTGGATTTTGATTGGGCAGAACGAGACCGGTGGACYAAATTTTTAAGCCCA[A/G]CARGGCTACATCTAGGTGCCAACCGGTCTAAACTCCACCAGTGGACTTTCTCTAAGAGAGGAGAATAATAGAGGGTTAAGATCAACTAGGGCAAGATCTA
Ro06-4435662	Ro06	4435662	A	G	ACATGTCACAAGACTAGGCACAAAGAGACCAGGTCATTGCCCCAGGTTGGATTTTGATTGGGCAGAACGAGACCGGTGGACYAAATTTTTAAGCCCARCA[A/G]GGCTACATCTAGGTGCCAACCGGTCTAAACTCCACCAGTGGACTTTCTCTAAGAGAGGAGAATAATAGAGGGTTAAGATCAACTAGGGCAAGATCTAATG
Ro06-4464452	Ro06	4464452	G	A	AATAAAATTGGAAGGATTGATTACATCACGGACGTCAAGCAGCTTGTACCTTGTTTTTGAGTATATGGAACATGATCTTACAGGACTTGCATCACGCCCA[G/A]GCATTAATTTCTCTGAACCCCAGGTACTCTTGTCTATTTTACACTTCTGATCATTCTAGTACTTTTGCCTTRAGCTTAACTTCWGCTAGTYATCCTCATA
Ro06-4464524	Ro06	4464524	G	A	TGATCTTACAGGACTTGCATCACGCCCARGCATTAATTTCTCTGAACCCCAGGTACTCTTGTCTATTTTACACTTCTGATCATTCTAGTACTTTTGCCTT[G/A]AGCTTAACTTCWGCTAGTYATCCTCATACCTAACTTRTAGACTAATCTTTATGTCATTTTAGGTTAAGTGTTACATGCAGCAACTTCTAAGTGGACTTAA
Ro06-4464536	Ro06	4464536	T	A	ACTTGCATCACGCCCARGCATTAATTTCTCTGAACCCCAGGTACTCTTGTCTATTTTACACTTCTGATCATTCTAGTACTTTTGCCTTRAGCTTAACTTC[T/A]GCTAGTYATCCTCATACCTAACTTRTAGACTAATCTTTATGTCATTTTAGGTTAAGTGTTACATGCAGCAACTTCTAAGTGGACTTAATCACTGTCATAG
Ro06-4464543	Ro06	4464543	C	T	TCACGCCCARGCATTAATTTCTCTGAACCCCAGGTACTCTTGTCTATTTTACACTTCTGATCATTCTAGTACTTTTGCCTTRAGCTTAACTTCWGCTAGT[C/T]ATCCTCATACCTAACTTRTAGACTAATCTTTATGTCATTTTAGGTTAAGTGTTACATGCAGCAACTTCTAAGTGGACTTAATCACTGTCATAGTCATGGT
Ro06-4464561	Ro06	4464561	A	G	TTCTCTGAACCCCAGGTACTCTTGTCTATTTTACACTTCTGATCATTCTAGTACTTTTGCCTTRAGCTTAACTTCWGCTAGTYATCCTCATACCTAACTT[A/G]TAGACTAATCTTTATGTCATTTTAGGTTAAGTGTTACATGCAGCAACTTCTAAGTGGACTTAATCACTGTCATAGTCATGGTGTTTTGCATCGTGACATA
Ro06-4527234	Ro06	4527234	T	G	CTGGTCCTTAATACCAAGCATGTACACTCACGGTCCTTAATACCTATGAGTATAATAGTGCACTATCTGAAGGGACTAGGGCCTACAGCTAACTCCAAAC[T/G]TCCATAGATCGTTCATACCAGTAATTTACTTAAGCTTGAGGATATACCGACTCCCGGTTTCAAATATAATTAGAATTCACAAATATTGTCTTGTTGTAAG
Ro06-4527525	Ro06	4527525	C	T	GTAAATCACATAATCAAGTAAATTACCAAGGTAAGAAAGTTAAGCATGCGATATCTCAAATACAATCTTAACAATAGATACTTCCATACATGTTACCATA[C/T]ATGTATACTACTATGTTGATGTATTCACTTAGTAAACAAAMTCATGCACCAACATAAGATTAGTAGATAATCAAGTGCAAGTAAAACACGTACATATAAA
Ro06-4527566	Ro06	4527566	A	C	AAGCATGCGATATCTCAAATACAATCTTAACAATAGATACTTCCATACATGTTACCATAYATGTATACTACTATGTTGATGTATTCACTTAGTAAACAAA[A/C]TCATGCACCAACATAAGATTAGTAGATAATCAAGTGCAAGTAAAACACGTACATATAAAGAGAGGCATATGTAAAACAAGATATACATATGTTCATAAAT
Ro06-4538023	Ro06	4538023	G	A	AGAAGTATACTTGATCACCTTTGTCAATATTGAGATGGCACAACTATAGTCTCAATTGTCAGTCACACCAGCACAATTGTTCAATGAACATGCAAGAATG[G/A]CAATTATGAATGGTTTCAAAAAGGTTTTGATTTGATAACCTCAACAAACTAAACAAGGAACAACATTGTTTTGTTATGGTTTTCTTTAAGCTCATTAATT
Ro06-4545296	Ro06	4545296	A	G	GCAATCGCACTTCTTCCCTTTACGTTTACACCCACAGCCCCTTAATCTCATCTAAATCCCTAACTTAATCTTCGATCCCAGACAAGGAAAAATGAAGCTT[A/G]CGTTCAAACCCAAAACCYAGACTAGTGCGTGCTAATATGCAACAACTATTTTGACAGGTTCAAAAGTAAACATGTTTCTTTATATTGGCCTCAGAGAGCA
Ro06-4545314	Ro06	4545314	C	T	TTTACGTTTACACCCACAGCCCCTTAATCTCATCTAAATCCCTAACTTAATCTTCGATCCCAGACAAGGAAAAATGAAGCTTRCGTTCAAACCCAAAACC[C/T]AGACTAGTGCGTGCTAATATGCAACAACTATTTTGACAGGTTCAAAAGTAAACATGTTTCTTTATATTGGCCTCAGAGAGCAGCGATTTGCCTGGGTACA
Ro06-4550724	Ro06	4550724	T	A	ATTATAGTACGTGTTACTTTTATATTAAGTTACTAGTGACATTAATTATGTTACTTCAAAAACCTGAAGTGATTGTGATCTTTGTGTAATCTATAGCAGT[T/A]AGCTGAAGAAGTGAAATGAAACTAACAATCATTAATATGTTAAGAACAAGACTGGCTACAGACATTCACAGGCAATAAACTTACTCAGGAAGAACGCATG
Ro06-4555171	Ro06	4555171	T	A	ATACTTTACTTGTGTTGTTATATACCATTTAAAATCCCAAATATGGATACTATTGTTTCCTTTGTTATGAAATAAACAGGGACACGTAAAAAGATGCAGA[T/A]RATACGCACAAGATAAAGCTCGAGAGTTCCCCAATGACTAATTCCGTTAGATTGTTGATTTGCTGAACACATATTGGGTGAACCATGATCGATCACTTCA
Ro06-4555172	Ro06	4555172	A	G	TACTTTACTTGTGTTGTTATATACCATTTAAAATCCCAAATATGGATACTATTGTTTCCTTTGTTATGAAATAAACAGGGACACGTAAAAAGATGCAGAW[A/G]ATACGCACAAGATAAAGCTCGAGAGTTCCCCAATGACTAATTCCGTTAGATTGTTGATTTGCTGAACACATATTGGGTGAACCATGATCGATCACTTCAT
Ro06-4567028	Ro06	4567028	A	G	GGCTCCATGTGCCAGATTTCTCGTGCAAAGCATGAAGAGACAACAGCATGTCAATAGAAAATTTCCTCAAATTTTTGTGATCTGCTAGGCTTTTCTCCCA[A/G]GCAAYATCAGGTCCAAGATCTGATGCATGAAGCATTGCTACTGTTGAACTATATCCGGTTTCTAAGATCTTCAATAGGCGTTGAATAATTTCTTCAGACA
Ro06-4567033	Ro06	4567033	C	T	CATGTGCCAGATTTCTCGTGCAAAGCATGAAGAGACAACAGCATGTCAATAGAAAATTTCCTCAAATTTTTGTGATCTGCTAGGCTTTTCTCCCARGCAA[C/T]ATCAGGTCCAAGATCTGATGCATGAAGCATTGCTACTGTTGAACTATATCCGGTTTCTAAGATCTTCAATAGGCGTTGAATAATTTCTTCAGACAAGATA
Ro06-4584398	Ro06	4584398	T	C	TTTGAAGCCATCATCCACATGAACCTATTGCCATTGATCTCACTTCAATCGGATTGCGGACGGAGGAGAATCGAGCAAAAGAAAATCCGGCCACCACGAC[T/C]TTCGAGGCAAATTTCGGCCAACCAAGACGGAATTGGTCTTTGAGGAGGACCTTGATAGGCGTTAGAAATAATTATGCATGCAATATATTTTTTAGAAATA
Ro06-4670395	Ro06	4670395	C	A	AAGAGCTTTAGTTTGGCCACTGGAAACTCAGAAATCACCTTCCGAACATGCAATGAAGAACCGGTCAATGTGACCCTTCAGAAAGTTAAACTACAGTGAT[C/A]ACTCTTCCTTTAAACACATATTGCAACAGATCCAACGGTCGATAAAGAGATAAATTTAACTTGGCAATAGAGGACTTATAGAAGAAGCTTTTCCAACTTG
Ro06-4682737	Ro06	4682737	G	A	CCATATCGATAATATCGGTGAAGTGGTGGGTTATACATGTGTTGCTTGTTTGAGTCCCTAGGTTCGACACTTTACTCCCTTTAAGCACTTTAAGAGATCC[G/A]GTATTAGGTAACATAGAGGGATCTCCTATGACACYTAGAAAGTTTGAATGGCCCTAATAAGRCATTTGGATAYCTTAGGAAAGCACGGTCCTAGACCCAT
Ro06-4682772	Ro06	4682772	T	C	CATGTGTTGCTTGTTTGAGTCCCTAGGTTCGACACTTTACTCCCTTTAAGCACTTTAAGAGATCCRGTATTAGGTAACATAGAGGGATCTCCTATGACAC[T/C]TAGAAAGTTTGAATGGCCCTAATAAGRCATTTGGATAYCTTAGGAAAGCACGGTCCTAGACCCATAATATGCCTAGGATACGGGGTTTGATTTGTGGACA
Ro06-4682799	Ro06	4682799	G	A	TTCGACACTTTACTCCCTTTAAGCACTTTAAGAGATCCRGTATTAGGTAACATAGAGGGATCTCCTATGACACYTAGAAAGTTTGAATGGCCCTAATAAG[G/A]CATTTGGATAYCTTAGGAAAGCACGGTCCTAGACCCATAATATGCCTAGGATACGGGGTTTGATTTGTGGACATATTGACATGATTGAGTGGATTAAAGC
Ro06-4682810	Ro06	4682810	C	T	ACTCCCTTTAAGCACTTTAAGAGATCCRGTATTAGGTAACATAGAGGGATCTCCTATGACACYTAGAAAGTTTGAATGGCCCTAATAAGRCATTTGGATA[C/T]CTTAGGAAAGCACGGTCCTAGACCCATAATATGCCTAGGATACGGGGTTTGATTTGTGGACATATTGACATGATTGAGTGGATTAAAGCATTGCTTGTTA
Ro06-4693577	Ro06	4693577	A	T	GCAAATTTGATTTAGATTTTGCTTTCTGAAATCCTTAATCTTTATCTTTTTTAAGTATGTATTCAGAGGTGATTGCTAGCTACAAATATGTCATAGATTG[A/T]GGAGTTTAATCCTTGCATACCTTTTTTGTTCGTGGATGGTTCACATGTGAAAAATAATTATAAGAACTAGCTTCTATCTCTTACTGGGAAGGATGAAAGT
Ro06-4694495	Ro06	4694495	G	T	TGGTTTTTTTTAGATCTTGAAATCTATTTTGGATCCACATCGGAGGATTATTACGTCTGTTTCAGATCTCCACACATGGTTGATGAATTCATTGGAGAAA[G/T]ATTTTTCTGAATTCATTGGCATTTACCTGTGCATGTCGTCAATGGCAAATTAAATATTTTCCATGCTCTCACGCTCTTGCGGGCACTCAGAAACCGGGAT
Ro06-4766277	Ro06	4766277	A	C	AAATTAAAAAGAATGTTGAAGGTCTATCACTCCATTGTAAATCATTTCCATCACACAAGTTTTTGTTGCTAAAGGAATGTTTCTTTTTTTGGTATTATGA[A/C]ATTGGTATACTTTTTGTCAGCTTTGAGTGCCTAGACATTCTTTTTATGACAGTACATGCGTTGATAGAGTGTGCACTTATTATGGTTTTCTGCTGCTCTT
Ro06-4804989	Ro06	4804989	A	G	TTATAAAGCCAGCCCACTTACCTTGGAAGTAAAAATGTGGTCTATACATGGTATAGACTGGAAACATGCCAAAAATCTATATAAATAAAAATAAGAAAAT[A/G]ATTATGTGAATCACCTATCTCAATAGTCTTGTTCCTTGATGAGTTCTTCAAAGAAGACAATGCCACTTTTCCTGAGTAAGCTTTAGTAGTAGAATGATAT
Ro06-4814391	Ro06	4814391	C	A	AAATGCAAATGAAGGGTTTGATTGTTTGAAGCAGGACCTTTGTAGCTGGTGGTGCTTTGGGAGTTGCTGACTTGCCAATGTGTCTTTTATTAGCAGAATG[C/A]CTTGTGTGTGACATGTTGGTTGTTTTAGCTTTGATGCTGAACCTATTTTCAGACTCTGATGAGCTAGCTATACGTAAAGCATTATTGTGCCATCTGGGTT
Ro06-4824175	Ro06	4824175	T	G	GATGGTAGTCAATATATCCTTGGGTCTCATCAATTTTTTTGACATATTAACCAATAAGTGTTGTTCTTCAGTTGTTAACTGTCCTGTATAAGAATGACCT[T/G]CAAGATATGATGGGGCGACATGATTGTGTACTCCACATGCAACCTCAAGTATCCACTCATCTGCACCAATATTGAAGGTGACTCTACATCAAAGTATAGT
Ro06-4824671	Ro06	4824671	G	A	CAAGTCTAATGCAACAAGTAATGCTTTAATCAACTCAATAATGTCAATGTGTCCACAAATCAAGCCCCGTATCCTAGCCATATTATGGGTCTAGGACCGT[G/A]TTCCTAAGGTATTCAAATGYCATATTATGGGYCATTCAAACTCTCTARRTGTCATAGGGGATTCCTCTAAGTTAYCTAATACCGAATCYCCTAAAGWGCT
Ro06-4824691	Ro06	4824691	T	C	ATGCTTTAATCAACTCAATAATGTCAATGTGTCCACAAATCAAGCCCCGTATCCTAGCCATATTATGGGTCTAGGACCGTRTTCCTAAGGTATTCAAATG[T/C]CATATTATGGGYCATTCAAACTCTCTARRTGTCATAGGGGATTCCTCTAAGTTAYCTAATACCGAATCYCCTAAAGWGCTTAAGAGGCGTAAARTGTCGA
Ro06-4824703	Ro06	4824703	T	C	ACTCAATAATGTCAATGTGTCCACAAATCAAGCCCCGTATCCTAGCCATATTATGGGTCTAGGACCGTRTTCCTAAGGTATTCAAATGYCATATTATGGG[T/C]CATTCAAACTCTCTARRTGTCATAGGGGATTCCTCTAAGTTAYCTAATACCGAATCYCCTAAAGWGCTTAAGAGGCGTAAARTGTCGAACCTAGGGACTC
Ro06-4824719	Ro06	4824719	G	A	GTGTCCACAAATCAAGCCCCGTATCCTAGCCATATTATGGGTCTAGGACCGTRTTCCTAAGGTATTCAAATGYCATATTATGGGYCATTCAAACTCTCTA[G/A]RTGTCATAGGGGATTCCTCTAAGTTAYCTAATACCGAATCYCCTAAAGWGCTTAAGAGGCGTAAARTGTCGAACCTAGGGACTCAAACAAAYAACACATG
Ro06-4824720	Ro06	4824720	G	A	TGTCCACAAATCAAGCCCCGTATCCTAGCCATATTATGGGTCTAGGACCGTRTTCCTAAGGTATTCAAATGYCATATTATGGGYCATTCAAACTCTCTAR[G/A]TGTCATAGGGGATTCCTCTAAGTTAYCTAATACCGAATCYCCTAAAGWGCTTAAGAGGCGTAAARTGTCGAACCTAGGGACTCAAACAAAYAACACATGC
Ro06-4824746	Ro06	4824746	T	C	AGCCATATTATGGGTCTAGGACCGTRTTCCTAAGGTATTCAAATGYCATATTATGGGYCATTCAAACTCTCTARRTGTCATAGGGGATTCCTCTAAGTTA[T/C]CTAATACCGAATCYCCTAAAGWGCTTAAGAGGCGTAAARTGTCGAACCTAGGGACTCAAACAAAYAACACATGCACAACCCACCACTCCACCGATATTAT
Ro06-4824760	Ro06	4824760	C	T	TCTAGGACCGTRTTCCTAAGGTATTCAAATGYCATATTATGGGYCATTCAAACTCTCTARRTGTCATAGGGGATTCCTCTAAGTTAYCTAATACCGAATC[C/T]CCTAAAGWGCTTAAGAGGCGTAAARTGTCGAACCTAGGGACTCAAACAAAYAACACATGCACAACCCACCACTCCACCGATATTATCGATATGGAGTGGA
Ro06-4824768	Ro06	4824768	T	A	CGTRTTCCTAAGGTATTCAAATGYCATATTATGGGYCATTCAAACTCTCTARRTGTCATAGGGGATTCCTCTAAGTTAYCTAATACCGAATCYCCTAAAG[T/A]GCTTAAGAGGCGTAAARTGTCGAACCTAGGGACTCAAACAAAYAACACATGCACAACCCACCACTCCACCGATATTATCGATATGGAGTGGATTCCCCTA
Ro06-4824785	Ro06	4824785	G	A	CAAATGYCATATTATGGGYCATTCAAACTCTCTARRTGTCATAGGGGATTCCTCTAAGTTAYCTAATACCGAATCYCCTAAAGWGCTTAAGAGGCGTAAA[G/A]TGTCGAACCTAGGGACTCAAACAAAYAACACATGCACAACCCACCACTCCACCGATATTATCGATATGGAGTGGATTCCCCTAAGGTATTCCTAAGCCTT
Ro06-4824811	Ro06	4824811	C	T	ACTCTCTARRTGTCATAGGGGATTCCTCTAAGTTAYCTAATACCGAATCYCCTAAAGWGCTTAAGAGGCGTAAARTGTCGAACCTAGGGACTCAAACAAA[C/T]AACACATGCACAACCCACCACTCCACCGATATTATCGATATGGAGTGGATTCCCCTAAGGTATTCCTAAGCCTTATTAAGGTCTTAGGGACTCTCCATGG
Ro06-4836033	Ro06	4836033	G	T	ATGTAAGCATACCTGTTCGGGTAGTTCAGCACTTCGGCTGTTGTTGAATTTAATCAATTTATCAATCTTGATTACTTGAATTCGATCTTGATGCAACTTA[G/T]CAGTTAGCAACTATGCAAGCAACGATTTGAAGAACAAGGACTGCATTAACAATTTAACACAGATTATAAGATTAAGAAATTAAAAATTTGAAATCAAACT
Ro06-4856117	Ro06	4856117	C	A	CCTAAAGCATGCCTTAGTAACTTCATCAAGGCCTTCCACATCAACTCCTTCCAATACTATGTCAGATTCTACATTCTCCTGAGTACTGATGCCCTCCTTG[C/A]TTTTRTATTCATCRTACATTCTCATCAAAATTCCCTTTAACTTTGCCGAAATTGATTGTATAACTTCTGCAGATGCATTCACTTGAATCAATGCCTTAGT
Ro06-4856122	Ro06	4856122	G	A	AGCATGCCTTAGTAACTTCATCAAGGCCTTCCACATCAACTCCTTCCAATACTATGTCAGATTCTACATTCTCCTGAGTACTGATGCCCTCCTTGMTTTT[G/A]TATTCATCRTACATTCTCATCAAAATTCCCTTTAACTTTGCCGAAATTGATTGTATAACTTCTGCAGATGCATTCACTTGAATCAATGCCTTAGTAGCCC
Ro06-4856131	Ro06	4856131	A	G	TAGTAACTTCATCAAGGCCTTCCACATCAACTCCTTCCAATACTATGTCAGATTCTACATTCTCCTGAGTACTGATGCCCTCCTTGMTTTTRTATTCATC[A/G]TACATTCTCATCAAAATTCCCTTTAACTTTGCCGAAATTGATTGTATAACTTCTGCAGATGCATTCACTTGAATCAATGCCTTAGTAGCCCATTGCAGCT
Ro06-4874231	Ro06	4874231	C	G	AACTGAAATCCATGAAGCTTTCTCTTAGCTTAAGAAACCTATCTGGCTGAACAAGTAAGATATGGACTGAACGACTGGGACTTAATCTGAAAGAACTACA[C/G]CATCACAAAYGCTGGACGTAAACTGTGGAATCTAGAATCTGAGTGAGTCCGTACGTCTAGCCGTACGTCGCMTGAAAGGTCCTAYCCYTCCAGACGTCTC
Ro06-4874241	Ro06	4874241	T	C	CATGAAGCTTTCTCTTAGCTTAAGAAACCTATCTGGCTGAACAAGTAAGATATGGACTGAACGACTGGGACTTAATCTGAAAGAACTACASCATCACAAA[T/C]GCTGGACGTAAACTGTGGAATCTAGAATCTGAGTGAGTCCGTACGTCTAGCCGTACGTCGCMTGAAAGGTCCTAYCCYTCCAGACGTCTCTCATGCAGGT
Ro06-4874303	Ro06	4874303	C	A	GACTGGGACTTAATCTGAAAGAACTACASCATCACAAAYGCTGGACGTAAACTGTGGAATCTAGAATCTGAGTGAGTCCGTACGTCTAGCCGTACGTCGC[C/A]TGAAAGGTCCTAYCCYTCCAGACGTCTCTCATGCAGGTATTACYGATCGGTCCTCGAAGGTTCGCATGCTAGATCAGGGCGTACGTGATATGGAAGTCCC
Ro06-4874316	Ro06	4874316	C	T	TCTGAAAGAACTACASCATCACAAAYGCTGGACGTAAACTGTGGAATCTAGAATCTGAGTGAGTCCGTACGTCTAGCCGTACGTCGCMTGAAAGGTCCTA[C/T]CCYTCCAGACGTCTCTCATGCAGGTATTACYGATCGGTCCTCGAAGGTTCGCATGCTAGATCAGGGCGTACGTGATATGGAAGTCCCTACCTTCCAGATA
Ro06-4874319	Ro06	4874319	C	T	GAAAGAACTACASCATCACAAAYGCTGGACGTAAACTGTGGAATCTAGAATCTGAGTGAGTCCGTACGTCTAGCCGTACGTCGCMTGAAAGGTCCTAYCC[C/T]TCCAGACGTCTCTCATGCAGGTATTACYGATCGGTCCTCGAAGGTTCGCATGCTAGATCAGGGCGTACGTGATATGGAAGTCCCTACCTTCCAGATACTC
Ro06-4874347	Ro06	4874347	T	C	ACGTAAACTGTGGAATCTAGAATCTGAGTGAGTCCGTACGTCTAGCCGTACGTCGCMTGAAAGGTCCTAYCCYTCCAGACGTCTCTCATGCAGGTATTAC[T/C]GATCGGTCCTCGAAGGTTCGCATGCTAGATCAGGGCGTACGTGATATGGAAGTCCCTACCTTCCAGATACTCACTAATCGGTAAACCAACATGGGTCATC
Ro06-4874804	Ro06	4874804	C	T	TCATTATTCACACAAAATCAACATTTAAATCATAAGTCATCAAATCTCAAAATACCAATTAATTCTAAAATCATAAATATTTCTAAAAATAAATAGCATG[C/T]ATAATTTAGTTTAAAACAAATGTCCACTCACAGCAAGCCGGCTAAGCCTGACGCCCGTCAAGGTCCTCCTCAACATCCTCCTGTGACGAAGTCCAATTCC
Ro06-4890105	Ro06	4890105	G	T	GTTGCGAAGTGGAATTCCTGAGGTTTAGTCACATGTTTCTTGGCATTACAGAACATCCCCAGATCTCCTTTACTTTCAAATATCTACACAAGATGTTACA[G/T]RAAACAAGATGGTTAGACATTCTCCTTACCTTATSTTTCTACTACGATGTTATTATTTAAAAGTGGAGATACCTTCTTATTCAGAGGCTTTGCCTTGAAT
Ro06-4890106	Ro06	4890106	G	A	TTGCGAAGTGGAATTCCTGAGGTTTAGTCACATGTTTCTTGGCATTACAGAACATCCCCAGATCTCCTTTACTTTCAAATATCTACACAAGATGTTACAK[G/A]AAACAAGATGGTTAGACATTCTCCTTACCTTATSTTTCTACTACGATGTTATTATTTAAAAGTGGAGATACCTTCTTATTCAGAGGCTTTGCCTTGAATT
Ro06-4890140	Ro06	4890140	C	G	TTTCTTGGCATTACAGAACATCCCCAGATCTCCTTTACTTTCAAATATCTACACAAGATGTTACAKRAAACAAGATGGTTAGACATTCTCCTTACCTTAT[C/G]TTTCTACTACGATGTTATTATTTAAAAGTGGAGATACCTTCTTATTCAGAGGCTTTGCCTTGAATTTTGGGATCTTTTCGAGTTCTTCCTGCTCAATTTC
Ro06-4932000	Ro06	4932000	G	C	TAAAAAAGTTTTTGTCTTTCTGCATGCAGGGTTTAATTACCAAGATTAAGAAGGTTCAAACAATAATGTAAAGATGACAACAGCAGCTTAGCTACTTGAT[G/C]AGTAGTAATTAATACAGTACTTAAGCGTGGGGGATCGAGCTTGGTGAATTTCTGGTCATGATGGGAGTGTTAATTAACTCCAATAGCTAGTGAGAACAAA
Ro06-4963438	Ro06	4963438	T	C	GGAAGGAGGAATTAATTAATTAGATTAGTTAAATAAGAAATCATGCATGCAACACATTCCTTTTTCTTCTTTTTAAAAAGAGGATCAAATGATTGCACTC[T/C]TACCYCYATGATGACTTGAACCCATGACCTAGATCTTAGGTCTTAGGTAGTGGGTGCTCTAACCACTGGAGCTAACACTAGTATCATATGCATGGTATAA
Ro06-4963443	Ro06	4963443	T	C	GAGGAATTAATTAATTAGATTAGTTAAATAAGAAATCATGCATGCAACACATTCCTTTTTCTTCTTTTTAAAAAGAGGATCAAATGATTGCACTCYTACC[T/C]CYATGATGACTTGAACCCATGACCTAGATCTTAGGTCTTAGGTAGTGGGTGCTCTAACCACTGGAGCTAACACTAGTATCATATGCATGGTATAATGATA
Ro06-4963445	Ro06	4963445	C	T	GGAATTAATTAATTAGATTAGTTAAATAAGAAATCATGCATGCAACACATTCCTTTTTCTTCTTTTTAAAAAGAGGATCAAATGATTGCACTCYTACCYC[C/T]ATGATGACTTGAACCCATGACCTAGATCTTAGGTCTTAGGTAGTGGGTGCTCTAACCACTGGAGCTAACACTAGTATCATATGCATGGTATAATGATATT
Ro06-5026194	Ro06	5026194	G	C	GCATACAAGATCTTTCAAACTCATTCTAGTTAACCCCAACCTGGAACATGCCTCAGTTTCAGAAATATAAGGATTGGTTTTCCAGCACCATACAATCCAT[G/C]CAAAATCTATACAGAGAAGAGGTTCATGCAAAGCAGATCAATATAAAGTAAAGGCAATTGCTATTTACAATAAAGAAACCATCTACTGTAGAGTTCATAA
Ro06-5060618	Ro06	5060618	G	T	CTGATCTTGGATGGGTTAACGATCTCTTGATGTAAATTGAGGACTCTGACCATTGCATAACTGATCCATGAAGATGAAGAAATAAAGATGGTGGGTACGT[G/T]ATCGATCTGGAAGTGTATATATACTTACTGCACCAGCCGTATATATATGCATGTCACTATATATATGTGATTTGGTGTAAATTATCGTCTTTACTATTCT
Ro06-5060783	Ro06	5060783	A	T	ATGTGATTTGGTGTAAATTATCGTCTTTACTATTCTTCTTGTTTGAAGATCGATGTAATATTGTTGTCTGTTTGATTTGATGATGATGGATTTGTTTTTG[A/T]AATTTTCATTTAAATTCGAAGACAGGAATTTGGAGTTCTCTATGCTCGTAAAGAGAACCAGATCTGTTATTATTAAGTCCTATGTATTTTTTTTTTTTTG
Ro06-5069037	Ro06	5069037	A	G	TCTAACTCAACCTGGATCGCATGTTTCCATTTAATTAGATCAATTATCTCTACGTTGTCATTCCTCAACAGAGCGGGGTTCATTATCATCAAACTCAATC[A/G]ACTCTCATGTACAAGCATATGCGAATACATCATCAACTACGATGGAGTTTCTATCCCACGTCTCATGTACACTAGTGTAATGAATCGAGATCTCTACATT
Ro06-5074660	Ro06	5074660	T	C	TTTGTGCCAATGGGCACATTTGGATCTATTGTCCCAGTTCTTACACTTGGTTCTATATCAAAGAGATGGATAGTACCCGGTTGGAGGCTTGGTTGGATTG[T/C]CACATGTGACCCCAATGATAYTCTTAMAAATTCTGGGGTACATCTCTTTCTCTGTCTCATTTACACACACACACACAYACCMACATTARAGAACAATGAT
Ro06-5074681	Ro06	5074681	C	T	GGATCTATTGTCCCAGTTCTTACACTTGGTTCTATATCAAAGAGATGGATAGTACCCGGTTGGAGGCTTGGTTGGATTGYCACATGTGACCCCAATGATA[C/T]TCTTAMAAATTCTGGGGTACATCTCTTTCTCTGTCTCATTTACACACACACACACAYACCMACATTARAGAACAATGATCGATCGATRTTTATGGCATAT
Ro06-5074687	Ro06	5074687	A	C	ATTGTCCCAGTTCTTACACTTGGTTCTATATCAAAGAGATGGATAGTACCCGGTTGGAGGCTTGGTTGGATTGYCACATGTGACCCCAATGATAYTCTTA[A/C]AAATTCTGGGGTACATCTCTTTCTCTGTCTCATTTACACACACACACACAYACCMACATTARAGAACAATGATCGATCGATRTTTATGGCATATATAAAT
Ro06-5074738	Ro06	5074738	T	C	GGTTGGAGGCTTGGTTGGATTGYCACATGTGACCCCAATGATAYTCTTAMAAATTCTGGGGTACATCTCTTTCTCTGTCTCATTTACACACACACACACA[T/C]ACCMACATTARAGAACAATGATCGATCGATRTTTATGGCATATATAAATTCTGYTCATATCWATGTTCTTGCCTCTTCTTCCCTCAGATTATTAAATCCA
Ro06-5074742	Ro06	5074742	C	A	GGAGGCTTGGTTGGATTGYCACATGTGACCCCAATGATAYTCTTAMAAATTCTGGGGTACATCTCTTTCTCTGTCTCATTTACACACACACACACAYACC[C/A]ACATTARAGAACAATGATCGATCGATRTTTATGGCATATATAAATTCTGYTCATATCWATGTTCTTGCCTCTTCTTCCCTCAGATTATTAAATCCATCAC
Ro06-5074749	Ro06	5074749	G	A	TGGTTGGATTGYCACATGTGACCCCAATGATAYTCTTAMAAATTCTGGGGTACATCTCTTTCTCTGTCTCATTTACACACACACACACAYACCMACATTA[G/A]AGAACAATGATCGATCGATRTTTATGGCATATATAAATTCTGYTCATATCWATGTTCTTGCCTCTTCTTCCCTCAGATTATTAAATCCATCACAGACTGT
Ro06-5074769	Ro06	5074769	A	G	ACCCCAATGATAYTCTTAMAAATTCTGGGGTACATCTCTTTCTCTGTCTCATTTACACACACACACACAYACCMACATTARAGAACAATGATCGATCGAT[A/G]TTTATGGCATATATAAATTCTGYTCATATCWATGTTCTTGCCTCTTCTTCCCTCAGATTATTAAATCCATCACAGACTGTCTGGAGGTCACATCTGATCC
Ro06-5074792	Ro06	5074792	C	T	TCTGGGGTACATCTCTTTCTCTGTCTCATTTACACACACACACACAYACCMACATTARAGAACAATGATCGATCGATRTTTATGGCATATATAAATTCTG[C/T]TCATATCWATGTTCTTGCCTCTTCTTCCCTCAGATTATTAAATCCATCACAGACTGTCTGGAGGTCACATCTGATCCTCCAACCTTCATTCAGGTTCTGT
Ro06-5074800	Ro06	5074800	A	T	ACATCTCTTTCTCTGTCTCATTTACACACACACACACAYACCMACATTARAGAACAATGATCGATCGATRTTTATGGCATATATAAATTCTGYTCATATC[A/T]ATGTTCTTGCCTCTTCTTCCCTCAGATTATTAAATCCATCACAGACTGTCTGGAGGTCACATCTGATCCTCCAACCTTCATTCAGGTTCTGTAATTCAAG
Ro06-5075075	Ro06	5075075	C	G	GAGCATATTATAGAGAATTTCTGTACTTTTTCTGTTTGTCTGATGAATTTAATGTGGCTTTCATTGATCTGCAGGCAGCAATTCCTCAAATTATAGAGAA[C/G]ACAAAGGAGGATTTCTTTTTKAAAATAGTTGAGATACTAAGAGGTGSTGCAGACATATGTTTTGATAGACTAAATGAGATCCMCTGYATTACATGCCCAA
Ro06-5075096	Ro06	5075096	G	T	TGTACTTTTTCTGTTTGTCTGATGAATTTAATGTGGCTTTCATTGATCTGCAGGCAGCAATTCCTCAAATTATAGAGAASACAAAGGAGGATTTCTTTTT[G/T]AAAATAGTTGAGATACTAAGAGGTGSTGCAGACATATGTTTTGATAGACTAAATGAGATCCMCTGYATTACATGCCCAAGYAAACCTGAGGGTTCCATGT
Ro06-5075122	Ro06	5075122	C	G	TTTAATGTGGCTTTCATTGATCTGCAGGCAGCAATTCCTCAAATTATAGAGAASACAAAGGAGGATTTCTTTTTKAAAATAGTTGAGATACTAAGAGGTG[C/G]TGCAGACATATGTTTTGATAGACTAAATGAGATCCMCTGYATTACATGCCCAAGYAAACCTGAGGGTTCCATGTTTGTAATGGTAATTGATCAAGCTCAT
Ro06-5075158	Ro06	5075158	C	A	CCTCAAATTATAGAGAASACAAAGGAGGATTTCTTTTTKAAAATAGTTGAGATACTAAGAGGTGSTGCAGACATATGTTTTGATAGACTAAATGAGATCC[C/A]CTGYATTACATGCCCAAGYAAACCTGAGGGTTCCATGTTTGTAATGGTAATTGATCAAGCTCATCAGTTCATATATGTATTTGTTTCTGARCCATATATG
Ro06-5075162	Ro06	5075162	C	T	AAATTATAGAGAASACAAAGGAGGATTTCTTTTTKAAAATAGTTGAGATACTAAGAGGTGSTGCAGACATATGTTTTGATAGACTAAATGAGATCCMCTG[C/T]ATTACATGCCCAAGYAAACCTGAGGGTTCCATGTTTGTAATGGTAATTGATCAAGCTCATCAGTTCATATATGTATTTGTTTCTGARCCATATATGCAGA
Ro06-5075177	Ro06	5075177	C	T	CAAAGGAGGATTTCTTTTTKAAAATAGTTGAGATACTAAGAGGTGSTGCAGACATATGTTTTGATAGACTAAATGAGATCCMCTGYATTACATGCCCAAG[C/T]AAACCTGAGGGTTCCATGTTTGTAATGGTAATTGATCAAGCTCATCAGTTCATATATGTATTTGTTTCTGARCCATATATGCAGATCTATAATTAAAATT
Ro06-5075249	Ro06	5075249	G	A	ATGAGATCCMCTGYATTACATGCCCAAGYAAACCTGAGGGTTCCATGTTTGTAATGGTAATTGATCAAGCTCATCAGTTCATATATGTATTTGTTTCTGA[G/A]CCATATATGCAGATCTATAATTAAAATTTCTTACATATATGCATGCAGGTGAAGCTGAACCTCTCATTATTGGATGACATTAGTGATGATGTGGAGTTCA
Ro06-5077568	Ro06	5077568	G	A	AAGCAATCAATCGAAATAGGTACCTGAATAAAGGTTGCCGGGTCACAAGTGATGTCGAGATAGTTCTTAATGCTGTCCACGATCTTGACAAAAGATCAAA[G/A]TGAATACCAATTAAATTTACAATGACAAATTACTTCAGGTATATATAATTAGTAATAGATCGAACAACATAATAATCTCCCGAGAGACACACTTGTATAT
Ro06-5077676	Ro06	5077676	T	C	CAATTAAATTTACAATGACAAATTACTTCAGGTATATATAATTAGTAATAGATCGAACAACATAATAATCTCCCGAGAGACACACTTGTATATTTGTTAG[T/C]AAAGCCAATCACTCACAATAATACAGCATGTTAATTCAAAGACATAAGAAAACTCGAATGACTGGAAAATAGATATATAGATTAGAAGAACAAGTTCTGT
Ro06-5123495	Ro06	5123495	T	C	CCTCAAATTAGCTTTTCTGATCTGATTCACCAACATTAACTAATTCGTACTCAACTAGAGAAAGATTGTAGCTCTCCAAAACTTCAAAGTTGGCTGGTTC[T/C]GTGACTTCAACACGACCCCATTTATCAACTGCCAGCCTCATAGTCCCTTTGAACATGTCAATCTTTGCATTGCGCAGGATCACAGTGGTTCCCGGCTTCA
Ro06-5133490	Ro06	5133490	G	A	TTTTCTCACTGCACTCTCATTTTGGTTTGTAACAATCTATTTAGGTTTTTGTTGCATGTCACTGCACTCTTGTGAAATGGGTCTTCTTGTGTTTCTTTGG[G/A]ATCTTCAAGTTTATCTGAAGATAAAGGTCAAGAAATACATCTTTTAATGCCTCTGTAAATGCATCCTAAAAACTTGAGCTTTTGGAAATAGTAGTAATCC
Ro06-5152924	Ro06	5152924	G	A	ATATCAAGCACTTACATGCCATTGTCACTGATGGGTATGGCTTGTTTGTTAGTCTGATTGCTAAGGTCACAAATGAATTGTACGTGAAACTTGTTGAACC[G/A]GTGAAGTGCCAGTTGATTTGGGTTACTAAGGAAATGATTGATGTTCAGGCTGTAGGCGTCCATGATTTGTTGGTTTGTTTTTTGAGGCAGATTGTTGGCG
Ro06-5160975	Ro06	5160975	G	T	GGCCTACCGGATCTATCAAGAGACAAAAAGCAAATCACTTTACCTGCTCGTTCTCAGCACCAGCATATGCAATCCCTAGACCCATTATTGCACCAATTCG[G/T]ATAGAGGGATCTTCTTTGTCAATGTATTCGCCCAGAAGTGCCAGTGCCTGAGAAAGAGATTAAGTAGGATTTAATTCCAAAAAAAAATAAATTAGAGATA
Ro06-5176700	Ro06	5176700	C	T	TGGATCCAAAGCTTGGAAATTTAGGTAGGGGATCTTGGGGAACCTTTTTAAATAATTGGTATATTTTGTGAATTATGGCTTGTTTGTGATGTTTGAATAG[C/T]ATGCTTGTTTGATATACGGTGATTGATATGACTTAAATGCGAGCATGAATTACATGTCTAAATGTTTATCTATATTTCTATTCAATTGCCATATATGAAC
Ro06-5197503	Ro06	5197503	A	G	AGTTTATTCTTTTTGCGGTGAGAATGGTATCAACATTCCCACTATGGATGATGTTTTTGTTGCTCAAGAAAAATCACAACATAAAGCTCAGAAGGTAACA[A/G]MCTTTCATCACTTTCAAGTGGAGATCTTTTATACTGTGATTGATAGACAACTTTCGGAACTGAATGATCGTTTCAATGAGGTAAACTCTGAGCTTCTTCT
Ro06-5197504	Ro06	5197504	A	C	GTTTATTCTTTTTGCGGTGAGAATGGTATCAACATTCCCACTATGGATGATGTTTTTGTTGCTCAAGAAAAATCACAACATAAAGCTCAGAAGGTAACAR[A/C]CTTTCATCACTTTCAAGTGGAGATCTTTTATACTGTGATTGATAGACAACTTTCGGAACTGAATGATCGTTTCAATGAGGTAAACTCTGAGCTTCTTCTT
Ro06-5271746	Ro06	5271746	T	C	AAAAAATAAGAACAATGAAAGATTTTAGCCGCAGAGGAATATTTAACTGCTACCACAATCATTCTCATAGTTTGTATATATGTATCTAAACAATGAGCAG[T/C]TCAACACAGCTTAATTAACGAAACTTTTTTGCACTTCGTCCTTGGCTACGTATTTTCTTTGTATCTTAAGCTTTCTAAATAAAGCATCATAATACTCTAT
Ro06-5306255	Ro06	5306255	G	A	CTTTAAGTGGCACTCTTATACTCAGAGACATATAACACCACTATTAATTAAGGTCGTCAATGACTCATAAGTACAATCAATATAATTAGCTTCAAGCATT[G/A]GGGCATATCTACGTTAATGTAAATATGTAATTGTAGATCGAAGACCTTCAAATGAAGACAACTAAATGGATCGAATATATTCGATCCCAAAATAATATAG
Ro06-5309071	Ro06	5309071	A	G	GTCGCGTCGGTATTCATCGAAGACGTCCTGCTTCTGCCCTCGATATCGCACGCCGTCTGATTGCATTGGCTGCATCCTCTGGAACCACCGATCTGCTTTC[A/G]CYWGTCAATGCCTTCAGCCCATYTACAGGCTTTAWGCCTCCTCCTRGGTCRAGTTCTTCAATCGCTCCAGCAAGCATGTCCCARACACCTMAAATCTGCT
Ro06-5309073	Ro06	5309073	C	T	CGCGTCGGTATTCATCGAAGACGTCCTGCTTCTGCCCTCGATATCGCACGCCGTCTGATTGCATTGGCTGCATCCTCTGGAACCACCGATCTGCTTTCRC[C/T]WGTCAATGCCTTCAGCCCATYTACAGGCTTTAWGCCTCCTCCTRGGTCRAGTTCTTCAATCGCTCCAGCAAGCATGTCCCARACACCTMAAATCTGCTGC
Ro06-5309074	Ro06	5309074	A	T	GCGTCGGTATTCATCGAAGACGTCCTGCTTCTGCCCTCGATATCGCACGCCGTCTGATTGCATTGGCTGCATCCTCTGGAACCACCGATCTGCTTTCRCY[A/T]GTCAATGCCTTCAGCCCATYTACAGGCTTTAWGCCTCCTCCTRGGTCRAGTTCTTCAATCGCTCCAGCAAGCATGTCCCARACACCTMAAATCTGCTGCC
Ro06-5309094	Ro06	5309094	T	C	CGTCCTGCTTCTGCCCTCGATATCGCACGCCGTCTGATTGCATTGGCTGCATCCTCTGGAACCACCGATCTGCTTTCRCYWGTCAATGCCTTCAGCCCAT[T/C]TACAGGCTTTAWGCCTCCTCCTRGGTCRAGTTCTTCAATCGCTCCAGCAAGCATGTCCCARACACCTMAAATCTGCTGCCCTTGGTCTTTCTTGGATCCT
Ro06-5309106	Ro06	5309106	A	T	GCCCTCGATATCGCACGCCGTCTGATTGCATTGGCTGCATCCTCTGGAACCACCGATCTGCTTTCRCYWGTCAATGCCTTCAGCCCATYTACAGGCTTTA[A/T]GCCTCCTCCTRGGTCRAGTTCTTCAATCGCTCCAGCAAGCATGTCCCARACACCTMAAATCTGCTGCCCTTGGTCTTTCTTGGATCCTGCGAAGACCCAG
Ro06-5309117	Ro06	5309117	G	A	CGCACGCCGTCTGATTGCATTGGCTGCATCCTCTGGAACCACCGATCTGCTTTCRCYWGTCAATGCCTTCAGCCCATYTACAGGCTTTAWGCCTCCTCCT[G/A]GGTCRAGTTCTTCAATCGCTCCAGCAAGCATGTCCCARACACCTMAAATCTGCTGCCCTTGGTCTTTCTTGGATCCTGCGAAGACCCAGGTGACGCCAGC
Ro06-5309122	Ro06	5309122	G	A	GCCGTCTGATTGCATTGGCTGCATCCTCTGGAACCACCGATCTGCTTTCRCYWGTCAATGCCTTCAGCCCATYTACAGGCTTTAWGCCTCCTCCTRGGTC[G/A]AGTTCTTCAATCGCTCCAGCAAGCATGTCCCARACACCTMAAATCTGCTGCCCTTGGTCTTTCTTGGATCCTGCGAAGACCCAGGTGACGCCAGCACAGA
Ro06-5309155	Ro06	5309155	G	A	CCACCGATCTGCTTTCRCYWGTCAATGCCTTCAGCCCATYTACAGGCTTTAWGCCTCCTCCTRGGTCRAGTTCTTCAATCGCTCCAGCAAGCATGTCCCA[G/A]ACACCTMAAATCTGCTGCCCTTGGTCTTTCTTGGATCCTGCGAAGACCCAGGTGACGCCAGCACAGACTATTCCCTCCTTCTCTTCCATTGTGGGGGACG
Ro06-5309162	Ro06	5309162	C	A	TCTGCTTTCRCYWGTCAATGCCTTCAGCCCATYTACAGGCTTTAWGCCTCCTCCTRGGTCRAGTTCTTCAATCGCTCCAGCAAGCATGTCCCARACACCT[C/A]AAATCTGCTGCCCTTGGTCTTTCTTGGATCCTGCGAAGACCCAGGTGACGCCAGCACAGACTATTCCCTCCTTCTCTTCCATTGTGGGGGACGCAGTCGC
Ro06-5327381	Ro06	5327381	G	A	AACAAGGTTTCAAGACTTTGCAATCCAATGCTCACGACCTTTGGTGATGCTTATCATGATGTACTTCAACCAATTGGGGTATGGGGTTGCCTCCCCATGA[G/A]CGCTTGTTTTTAGAGACCCTCAAGCCGGTCTTTCTTCTTCCTTCATACTTCATGGAGGCTCATAGCTCTCCTTCTTACCACCCACCATGGTGGTCTTGTT
Ro06-5352042	Ro06	5352042	C	T	TATGATCTAGTCGATATATTGTTACAGTAGAAAACGAAAACAAAACACATATTTTTTGAATTTTTTGAAATTTTTTTTTTTTTGAATAAAGTGAAACCTT[C/T]CCCCCACACTTGAATTAAACATTGTGCTCAATGTAAGACAGATATGTGCAGATAAAGAATAATTCAAGCATGCTTATTGAATTGAAACACACAACAAACA
Ro06-5360061	Ro06	5360061	A	T	TAATTATCAAAGGAGACAATGCAAATCTTATCCAATAGATCAACAGATGGCATGTAAAATCAAAAAAATTGAGAATAATCCACAGTTAAAAAGTTATCCA[A/T]TATGAATAGAAAATTGAACCTACTTTATATAAAGCTCAGCATGAGAGAGATAAACATAACAGAGAAGAGACAAGCTCAAGGAAGACCGGTTGCAGCCAAT
Ro06-5489663	Ro06	5489663	T	A	CATTTCAAGTGCACAGATGCTTAATGGCTATGAGAAAATTACTGATTAGGGCATACAATGTCTGCATGCACTAACCAAGTGATTTATTCATTCTTTTTTT[T/A]ATATTCAAGTATTATATCCATTATGGATTATGTACTAAAATAAATGATATGATATTAATATGATATTACTTGCAATAAATACCCCAGATACCTTCTCCTT
Ro06-5491493	Ro06	5491493	T	C	CCTTACCAAAGGTTCTATGGCAAGAATGACAGTGGTTCTCTTCAAAATAAAAAATACCATGACAAGAATTACAGATGTCCACCAGCTGAGGACACCTTTT[T/C]TTCCCATTTTTATTAGCACATAATATTGAAGAACCAACRCATTCTTTCCAAATCCACCTCTCCAGATCTTGATATCTATTTAAAGCCCCAGTTTTCTCAG
Ro06-5491532	Ro06	5491532	G	A	CTTCAAAATAAAAAATACCATGACAAGAATTACAGATGTCCACCAGCTGAGGACACCTTTTYTTCCCATTTTTATTAGCACATAATATTGAAGAACCAAC[G/A]CATTCTTTCCAAATCCACCTCTCCAGATCTTGATATCTATTTAAAGCCCCAGTTTTCTCAGTTTCGTTCTTCCCAAGCTCAATTGAAAAAGTTATTGAGC
Ro06-5528041	Ro06	5528041	T	C	TAAACATGCAATATAAGTCATATCAATCACTAAATATTAAACAAACATGTTATTCAAACAGCGCAAGCAAGAAATCATTTAAAAAGGTTTTCCAAGATCC[T/C]CCTACCTTGATTCCAGTACTATTGTGTGGCTCTACGTTAGCTCCTTGACTTTATTATCTTTTGAAGAARTACCAATTCAAGTGCTAGATCGTAAAGAGAA
Ro06-5528110	Ro06	5528110	A	G	AGAAATCATTTAAAAAGGTTTTCCAAGATCCYCCTACCTTGATTCCAGTACTATTGTGTGGCTCTACGTTAGCTCCTTGACTTTATTATCTTTTGAAGAA[A/G]TACCAATTCAAGTGCTAGATCGTAAAGAGAAAGTTTTATGTACCAAAACTATTCTCTTAGTGAGAAACTCTTTATTTTTTTTTTTTGGATGGAGGAAAGT
Ro06-5564173	Ro06	5564173	A	T	TTTAATTTTTAATTTCTTTTTATCAATAATGGAAAACATTTCATTGTATAAAGGACATCAAGCCAATAAATACAACAAAGGCATTAGAAGGCATGCCCCA[A/T]AGGGATAAATAACCACAYATTGTTGTACGTAGAACATATTGTGGCACTRTCCCGTAAAGGGTACCTAACATTACWAATCGGGCCTAGAAAACAAAGCCAA
Ro06-5564191	Ro06	5564191	C	T	TTTATCAATAATGGAAAACATTTCATTGTATAAAGGACATCAAGCCAATAAATACAACAAAGGCATTAGAAGGCATGCCCCAWAGGGATAAATAACCACA[C/T]ATTGTTGTACGTAGAACATATTGTGGCACTRTCCCGTAAAGGGTACCTAACATTACWAATCGGGCCTAGAAAACAAAGCCAAAACAACACAACCCAACCA
Ro06-5564222	Ro06	5564222	A	G	AAAGGACATCAAGCCAATAAATACAACAAAGGCATTAGAAGGCATGCCCCAWAGGGATAAATAACCACAYATTGTTGTACGTAGAACATATTGTGGCACT[A/G]TCCCGTAAAGGGTACCTAACATTACWAATCGGGCCTAGAAAACAAAGCCAAAACAACACAACCCAACCAGATTGTGAAAKGAGTATTAGGAAGAAGAAAG
Ro06-5564248	Ro06	5564248	A	T	CAAAGGCATTAGAAGGCATGCCCCAWAGGGATAAATAACCACAYATTGTTGTACGTAGAACATATTGTGGCACTRTCCCGTAAAGGGTACCTAACATTAC[A/T]AATCGGGCCTAGAAAACAAAGCCAAAACAACACAACCCAACCAGATTGTGAAAKGAGTATTAGGAAGAAGAAAGATAGATTGTGCTAGTCTTGTAGCTTG
Ro06-5564302	Ro06	5564302	T	G	GTAGAACATATTGTGGCACTRTCCCGTAAAGGGTACCTAACATTACWAATCGGGCCTAGAAAACAAAGCCAAAACAACACAACCCAACCAGATTGTGAAA[T/G]GAGTATTAGGAAGAAGAAAGATAGATTGTGCTAGTCTTGTAGCTTGCTTCATGGTTGTAGTAGTACTGCAAAGTTATGATCGATATGATCCTGACATTTG
Ro06-5578049	Ro06	5578049	C	G	TCGATCGTTAGTCATCAAAGGTTTTATTCAAGCATCTCAAGGTATGATTCATGCATATGCACATGTACTTAATTCACATCGAGTCTTCCTTGTTGTCCTA[C/G]GTTTATCTAGGTTGTTTCTTTTTACTATGATGTGAATTACATAAGTATAAAATGGTTGTTTGCCACACTTGTGTTGTGAATTACACAAGTTTCGCTCGCT
Ro06-5612525	Ro06	5612525	C	T	AAGCAAAAGAGAGGAAAACGCACAAGTTTGGAGAATTCCCGATGATGGAGTCCCGACCAATGAAGGAAATCCTGAGAAAATAAGGAAAAGCTGAGGCATG[C/T]GCAGTAAATTTAATTGGTTCGAACATTTATTTAATGTTTGACCAATTAAATGATTCATAGATGACTTCCCTTGTAAGTTAAAGAATTTTAATCCTACAAG
Ro06-5615382	Ro06	5615382	A	T	AACCAATTTAAACATGACATGTACGTCAATATTTTTCTTACATTTGAATCATAATTGCATGTATTGCAGTTATAAAAGGTGGTATACTCATCCATGCTTC[A/T]ATGGAAACTATACACTACCTCTGGTGCATCAAATAATCCAGGAAATAAAACCCTTTTGTACCTGTAAGTCCACTAATTGGTAGGTAGCTAYGTAGCTAGC
Ro06-5615473	Ro06	5615473	C	T	CCATGCTTCWATGGAAACTATACACTACCTCTGGTGCATCAAATAATCCAGGAAATAAAACCCTTTTGTACCTGTAAGTCCACTAATTGGTAGGTAGCTA[C/T]GTAGCTAGCTAGGTCCTTTAATTTGATGTCCCCATGCGGCCATGCATGCATGCATGGTGCTTTAGGTTATTGCTCAAAGGCAAACAGTAGGCCCAATAAT
Ro06-5632177	Ro06	5632177	A	C	AGTCATGATGAGCCCATGTTGTCATCAAAACAAAGCTTGTTGATTCTAAGACATGCAAGTGGGCTGGCGGGGGCAAGCCCATCTTCACGTGTAAATATGT[A/C]CRTGTGTACAACAGATCTTGGCCGTTGAATATTCAGTACCACAATGTCTGTTCAATATGTAGAAAATGTTTGTGTAAGACCATGTGAACACTATAACATT
Ro06-5632179	Ro06	5632179	G	A	TCATGATGAGCCCATGTTGTCATCAAAACAAAGCTTGTTGATTCTAAGACATGCAAGTGGGCTGGCGGGGGCAAGCCCATCTTCACGTGTAAATATGTMC[G/A]TGTGTACAACAGATCTTGGCCGTTGAATATTCAGTACCACAATGTCTGTTCAATATGTAGAAAATGTTTGTGTAAGACCATGTGAACACTATAACATTGT
Ro06-5709947	Ro06	5709947	C	T	TGATCTTCTCGGGATTAGCCTCGATACCTCGGTGGCTGACCATGAAGCCAAGGAATTTCCCCTCACCTACGCAGAAGAAGCACTTCTCGGGATTGAGTTT[C/T]ATCCCATAGTTTTGGAGAATGGAGAATGTCTCCTGTAGGTCGGTGAGGTGGTCACCCTGCTTGAGGCTCTTGACGAGCATGTCGTCTACGTACACTTCCA
Ro06-5725732	Ro06	5725732	A	T	TCAAGCCTGAGAAGTATTATAAAAGGACAAATCAAGATAGTGATGGCACATTTCTAGTTTCGGTCAAAATGATCTACATCAAACGGGAAGCCAAAACTGC[A/T]TGCAATMCTCCTGCATAAAAYGTATTTATCAATTAGTTGGAATTTGATTTGGAAAAAAAAAATTTAGATGGAATTTGATTTCTCTAGCAAATGATTACCA
Ro06-5725739	Ro06	5725739	C	A	TGAGAAGTATTATAAAAGGACAAATCAAGATAGTGATGGCACATTTCTAGTTTCGGTCAAAATGATCTACATCAAACGGGAAGCCAAAACTGCWTGCAAT[C/A]CTCCTGCATAAAAYGTATTTATCAATTAGTTGGAATTTGATTTGGAAAAAAAAAATTTAGATGGAATTTGATTTCTCTAGCAAATGATTACCAATTRACT
Ro06-5725753	Ro06	5725753	T	C	AAAGGACAAATCAAGATAGTGATGGCACATTTCTAGTTTCGGTCAAAATGATCTACATCAAACGGGAAGCCAAAACTGCWTGCAATMCTCCTGCATAAAA[T/C]GTATTTATCAATTAGTTGGAATTTGATTTGGAAAAAAAAAATTTAGATGGAATTTGATTTCTCTAGCAAATGATTACCAATTRACTCACATCCGTAATRA
Ro06-5725836	Ro06	5725836	A	G	AATMCTCCTGCATAAAAYGTATTTATCAATTAGTTGGAATTTGATTTGGAAAAAAAAAATTTAGATGGAATTTGATTTCTCTAGCAAATGATTACCAATT[A/G]ACTCACATCCGTAATRATATCAAWTCCAAAACGGCATGTGCAATAACTTGATATCATGACCAGAACCAGAAGAATTAATTGTTGTTTTCTGCATGTAATT
Ro06-5725852	Ro06	5725852	G	A	AYGTATTTATCAATTAGTTGGAATTTGATTTGGAAAAAAAAAATTTAGATGGAATTTGATTTCTCTAGCAAATGATTACCAATTRACTCACATCCGTAAT[G/A]ATATCAAWTCCAAAACGGCATGTGCAATAACTTGATATCATGACCAGAACCAGAAGAATTAATTGTTGTTTTCTGCATGTAATTTTCACATCAATTAGTT
Ro06-5725860	Ro06	5725860	T	A	ATCAATTAGTTGGAATTTGATTTGGAAAAAAAAAATTTAGATGGAATTTGATTTCTCTAGCAAATGATTACCAATTRACTCACATCCGTAATRATATCAA[T/A]TCCAAAACGGCATGTGCAATAACTTGATATCATGACCAGAACCAGAAGAATTAATTGTTGTTTTCTGCATGTAATTTTCACATCAATTAGTTGGAAATTA
Ro06-5728554	Ro06	5728554	T	G	ATTTTCTCTCATTGAAATGGGCTTTCACATTTTCATCATTGTAGGCTAGTTGTGCAAGGGTGGTCTTCCCCATCCCCCCCATCCCTACAACAGGGATTAC[T/G]AGGGGCCCTCTCTCTTCTTCATCGGTACTAGTACTAGTACTGTGACCCAACAACATGCTTATCAAAGCATGTTTTTCATTTTCCCGACCAAATATCTCAG
Ro06-5832926	Ro06	5832926	C	T	AAAGCCTTTATGTGATCTCCTCGCAAAGGATGCTCCATGGGATTTCACCGAAGATTGTTTGAAGGCCTTTGAGGAGATAAAGAAGTTGCTAACTAGTGCA[C/T]CTATCATTTGTGCACCCGATTGGAGCTTACCCTTTGAATTGATGTGTGATGCTTCCGACTACGCAATGGGGGCGGTTCTAGGCCAAAAGAATGAGAAATT
Ro06-5862955	Ro06	5862955	C	G	CCCACTAGTTTCAATCATCCAAAGTGCCCAAAACTCCCATCTTTTTCACATGTTCCTGATAAGCAGCTACAGACAACGGTTTGGTTAGAGGATCAGCTAA[C/G]TGCTCTAAAGTGCCAATTTTAATGACYTCAATCTCACCATCCMTGATGCTCTCTCTGACTGAAAAGTACTTTACATCTATATTTTTAGAAGCTGAAGACC
Ro06-5862982	Ro06	5862982	C	T	CCAAAACTCCCATCTTTTTCACATGTTCCTGATAAGCAGCTACAGACAACGGTTTGGTTAGAGGATCAGCTAASTGCTCTAAAGTGCCAATTTTAATGAC[C/T]TCAATCTCACCATCCMTGATGCTCTCTCTGACTGAAAAGTACTTTACATCTATATTTTTAGAAGCTGAAGACCTTTTATTATTCTTAGCGAAAAACACAG
Ro06-5862998	Ro06	5862998	C	A	TTTCACATGTTCCTGATAAGCAGCTACAGACAACGGTTTGGTTAGAGGATCAGCTAASTGCTCTAAAGTGCCAATTTTAATGACYTCAATCTCACCATCC[C/A]TGATGCTCTCTCTGACTGAAAAGTACTTTACATCTATATTTTTAGAAGCTGAAGACCTTTTATTATTCTTAGCGAAAAACACAGCTGCAGCATTGTCACA
Ro06-5882788	Ro06	5882788	G	T	AATGATAATATTGGATGGTTTTAAACACTTGTAGTTATTGCATGTATCAACAAGGGCATTCGTTGTTAAACTTGCATTTTATTTAACAAGATTTTTCCAT[G/T]GTGAACAGGGTGAGGCCACAAGTGCCAAGCTGCTTGGGGAAGCTATTGCGAACAATSCGGCATTTATCACACTGAGGAAGATTGAAGCTGCAAGAGAAAT
Ro06-5882845	Ro06	5882845	G	C	ATTCGTTGTTAAACTTGCATTTTATTTAACAAGATTTTTCCATKGTGAACAGGGTGAGGCCACAAGTGCCAAGCTGCTTGGGGAAGCTATTGCGAACAAT[G/C]CGGCATTTATCACACTGAGGAAGATTGAAGCTGCAAGAGAAATAGCACAGACCATCTCAAATACAGCAAACAAAGTTTACTTGAGTTCTGATGATCTGTT
Ro06-5883848	Ro06	5883848	T	G	ACCAACGTGTTCGATCGATTTATATGTTATAAATCCATAATGATCGTTGTACATGCTCTGTGGGAGTAGTGAGACTTTTACCTTATGAGTTATCTATCTG[T/G]CCTTAAAATTYCATGTGTATTGRYAAARTTTGTTCATTAGTTCATTTTTGATAATATTTGTGAAGTTGTGTACTAYTTCTCCGATATTTCTGACCAATCT
Ro06-5883859	Ro06	5883859	T	C	CGATCGATTTATATGTTATAAATCCATAATGATCGTTGTACATGCTCTGTGGGAGTAGTGAGACTTTTACCTTATGAGTTATCTATCTGKCCTTAAAATT[T/C]CATGTGTATTGRYAAARTTTGTTCATTAGTTCATTTTTGATAATATTTGTGAAGTTGTGTACTAYTTCTCCGATATTTCTGACCAATCTATATATAAAAC
Ro06-5883871	Ro06	5883871	G	A	ATGTTATAAATCCATAATGATCGTTGTACATGCTCTGTGGGAGTAGTGAGACTTTTACCTTATGAGTTATCTATCTGKCCTTAAAATTYCATGTGTATTG[G/A]YAAARTTTGTTCATTAGTTCATTTTTGATAATATTTGTGAAGTTGTGTACTAYTTCTCCGATATTTCTGACCAATCTATATATAAAACCTTGATTTAGAT
Ro06-5883872	Ro06	5883872	T	C	TGTTATAAATCCATAATGATCGTTGTACATGCTCTGTGGGAGTAGTGAGACTTTTACCTTATGAGTTATCTATCTGKCCTTAAAATTYCATGTGTATTGR[T/C]AAARTTTGTTCATTAGTTCATTTTTGATAATATTTGTGAAGTTGTGTACTAYTTCTCCGATATTTCTGACCAATCTATATATAAAACCTTGATTTAGATA
Ro06-5883876	Ro06	5883876	A	G	ATAAATCCATAATGATCGTTGTACATGCTCTGTGGGAGTAGTGAGACTTTTACCTTATGAGTTATCTATCTGKCCTTAAAATTYCATGTGTATTGRYAAA[A/G]TTTGTTCATTAGTTCATTTTTGATAATATTTGTGAAGTTGTGTACTAYTTCTCCGATATTTCTGACCAATCTATATATAAAACCTTGATTTAGATACAAC
Ro06-5883924	Ro06	5883924	T	C	TTTACCTTATGAGTTATCTATCTGKCCTTAAAATTYCATGTGTATTGRYAAARTTTGTTCATTAGTTCATTTTTGATAATATTTGTGAAGTTGTGTACTA[T/C]TTCTCCGATATTTCTGACCAATCTATATATAAAACCTTGATTTAGATACAACATCATGGCGTTTTCCAAGTGTTGGACTATTGGTCGAGATCCTGAATTC
Ro06-5890162	Ro06	5890162	A	G	GACTATTCAGTGGTACATAACAAAATCTCAGTCACAAAGAAGCAAAGAACATACCAGTTAGAACATCATTGAAAGAAGGGAATGTATCCGAATGGATGTC[A/G]AACTGTGACTGAGACTGAGACTGTGCCTCAGCAATCAGATGACTATAATCTGCACCTTGACTCTTCGGCAAAACAATGTCAGTGGCCTGATTCAGACCAC
Ro06-5893114	Ro06	5893114	A	G	CCTGATATTAGCTCTCATTGGATCTAATTAAGCTCAAATCCTTAAGAATCCTAATCCTAGAGCCCTAGATATGATATGTCACTGAAAACGGCATGACTCA[A/G]TTAACATACATGCAAGAGCTTCCTCTTTCCAAGCATGAAGCTCTTGCATCCTTACCCATGTTTGATAAGGGAGCAAGAGCTTCTGCAGTCAATAATGGAT
Ro06-5910052	Ro06	5910052	T	C	TTCCACTGCATGTATCTCACTACTTCAACCGTACTACATTTATCTCATAACTTATACTACATTTTAACTCACTGCTTCCACTACATATATCTCATAACTT[T/C]CACWACATTATCTCATTGCTTCCACTACATTTTAACTCACTACTTCCACTACAATTTAACTCACTGCTTCCACTGCATGTCTCTCATAACTTCCGTTGCA
Ro06-5910056	Ro06	5910056	A	T	ACTGCATGTATCTCACTACTTCAACCGTACTACATTTATCTCATAACTTATACTACATTTTAACTCACTGCTTCCACTACATATATCTCATAACTTYCAC[A/T]ACATTATCTCATTGCTTCCACTACATTTTAACTCACTACTTCCACTACAATTTAACTCACTGCTTCCACTGCATGTCTCTCATAACTTCCGTTGCATGTA
Ro06-5960295	Ro06	5960295	C	G	TTTCCTTAGTAGAGAAGTTTTGTGTTTAAGGTTTAGGGTTTATACACAAGACTTCTCTACTAAGGAGGTCTTTATTTTATAAAGTTTGGAGTTTTGATGT[C/G]AGCCGTTAAATCAGATTTTTTAAACGGATCTGACGACTGAGATGAAGACATGCCAAACACTAAGGAGGCCCTTACTAAATTGAGATGAATATTGATAATG
Ro06-6025657	Ro06	6025657	G	A	CCTGAGCACAAGTAAGCCATCTCAGGCAAGTCAAATTAACTGACCCATCACATAGACACAATACAAAAACAGAAGATAGCTCAGAACCAGGATTTTGTAT[G/A]GTGAACCTTACAAGAGCTTTACATTATTATGGGTAAATATAATTTCTTCTCATAAGGGAAAAAAAAATCACTRAACATTGTCCRCATGCACTGATTTTCA
Ro06-6025730	Ro06	6025730	A	G	AGATAGCTCAGAACCAGGATTTTGTATRGTGAACCTTACAAGAGCTTTACATTATTATGGGTAAATATAATTTCTTCTCATAAGGGAAAAAAAAATCACT[A/G]AACATTGTCCRCATGCACTGATTTTCAAACAAAAATTATTTGCTTTCAACTACAATGAGGCAAACATAGAACCACGGACCTTCCCTTCTTCAATTTTCTC
Ro06-6025741	Ro06	6025741	A	G	AACCAGGATTTTGTATRGTGAACCTTACAAGAGCTTTACATTATTATGGGTAAATATAATTTCTTCTCATAAGGGAAAAAAAAATCACTRAACATTGTCC[A/G]CATGCACTGATTTTCAAACAAAAATTATTTGCTTTCAACTACAATGAGGCAAACATAGAACCACGGACCTTCCCTTCTTCAATTTTCTCAACTCCAGAAT
Ro06-6035102	Ro06	6035102	G	A	CCTAAGGTATTCAAATGCCTTATTAGGGCCATTCAAACTCTCTAAATGTCATAGGAGATCCCTCTATGTTACATAATACCGAATCTCCTAAAGTGCTTAA[G/A]AGGCGTAAARAKTCGAAKCTKAGGGACTCARACAAGCAACRCATGTATAACCCATAACTCCCCCGATATTATCGATACGGAGTAGATTCTTTCTAAGGTA
Ro06-6035112	Ro06	6035112	G	A	TCAAATGCCTTATTAGGGCCATTCAAACTCTCTAAATGTCATAGGAGATCCCTCTATGTTACATAATACCGAATCTCCTAAAGTGCTTAARAGGCGTAAA[G/A]AKTCGAAKCTKAGGGACTCARACAAGCAACRCATGTATAACCCATAACTCCCCCGATATTATCGATACGGAGTAGATTCTTTCTAAGGTATTCCTAAGTC
Ro06-6035114	Ro06	6035114	G	T	AAATGCCTTATTAGGGCCATTCAAACTCTCTAAATGTCATAGGAGATCCCTCTATGTTACATAATACCGAATCTCCTAAAGTGCTTAARAGGCGTAAARA[G/T]TCGAAKCTKAGGGACTCARACAAGCAACRCATGTATAACCCATAACTCCCCCGATATTATCGATACGGAGTAGATTCTTTCTAAGGTATTCCTAAGTCTT
Ro06-6035120	Ro06	6035120	G	T	CTTATTAGGGCCATTCAAACTCTCTAAATGTCATAGGAGATCCCTCTATGTTACATAATACCGAATCTCCTAAAGTGCTTAARAGGCGTAAARAKTCGAA[G/T]CTKAGGGACTCARACAAGCAACRCATGTATAACCCATAACTCCCCCGATATTATCGATACGGAGTAGATTCTTTCTAAGGTATTCCTAAGTCTTATTAGG
Ro06-6035123	Ro06	6035123	T	G	ATTAGGGCCATTCAAACTCTCTAAATGTCATAGGAGATCCCTCTATGTTACATAATACCGAATCTCCTAAAGTGCTTAARAGGCGTAAARAKTCGAAKCT[T/G]AGGGACTCARACAAGCAACRCATGTATAACCCATAACTCCCCCGATATTATCGATACGGAGTAGATTCTTTCTAAGGTATTCCTAAGTCTTATTAGGGTC
Ro06-6035133	Ro06	6035133	A	G	TTCAAACTCTCTAAATGTCATAGGAGATCCCTCTATGTTACATAATACCGAATCTCCTAAAGTGCTTAARAGGCGTAAARAKTCGAAKCTKAGGGACTCA[A/G]ACAAGCAACRCATGTATAACCCATAACTCCCCCGATATTATCGATACGGAGTAGATTCTTTCTAAGGTATTCCTAAGTCTTATTAGGGTCTTAGAAACTC
Ro06-6035143	Ro06	6035143	A	G	CTAAATGTCATAGGAGATCCCTCTATGTTACATAATACCGAATCTCCTAAAGTGCTTAARAGGCGTAAARAKTCGAAKCTKAGGGACTCARACAAGCAAC[A/G]CATGTATAACCCATAACTCCCCCGATATTATCGATACGGAGTAGATTCTTTCTAAGGTATTCCTAAGTCTTATTAGGGTCTTAGAAACTCCATGAAAAAG
Ro06-6037477	Ro06	6037477	A	T	GCTTCTGTTCATTAATATATACATTCCAAGAAGAACAACATATGTTCGTGCTATAAAACAGTTAAAAATATAGCTACATGCAAAGTATGGAACAAAAAAT[A/T]AAAATTGTAATTGACCAAGTATAAGATGAAGCATAAGCAAAAAAGGAAATAAAGGGAAACTTACAAATGCATATGACCAAGGAGTTGAATAAATGGCTAA
Ro06-6084671	Ro06	6084671	G	A	TTCCTATATTCAAGTTATCAGTTATCCTGCTCTTTTCTTTTTCTTTTTTCTTTTTTCTAGTTATTGTTATTATGCATATAATTTAATGATAACGAAGAAC[G/A]CYGAAGAACATGTTTATAATCTGTTTGTTGATACAGTTTGTTTGGCTCAGGTGCTTCAGAATTTCTACCAAAAAAAGAAGAAAATGTTTTTCCATATAGT
Ro06-6084673	Ro06	6084673	C	T	CCTATATTCAAGTTATCAGTTATCCTGCTCTTTTCTTTTTCTTTTTTCTTTTTTCTAGTTATTGTTATTATGCATATAATTTAATGATAACGAAGAACRC[C/T]GAAGAACATGTTTATAATCTGTTTGTTGATACAGTTTGTTTGGCTCAGGTGCTTCAGAATTTCTACCAAAAAAAGAAGAAAATGTTTTTCCATATAGTGT
Ro06-6101142	Ro06	6101142	C	T	CTGGAGACGTTCGACCGGCCAACAGTAGTCCTTCGACCGGTTAATGGGCGTTTGACGAAAACTGCACAATACTTTGGCATGTCAGTGACGCCAATCCCCC[C/T]TCCTTGAATCATCTTTTGATTCTTGCTTCTATTAGCTCGATAAAAAGGATGTCCATATGAGGTTCTCAATATACGRATCATCATATCACGACCTAGGTGT
Ro06-6101218	Ro06	6101218	G	A	GCATGTCAGTGACGCCAATCCCCCYTCCTTGAATCATCTTTTGATTCTTGCTTCTATTAGCTCGATAAAAAGGATGTCCATATGAGGTTCTCAATATACG[G/A]ATCATCATATCACGACCTAGGTGTCCCAATTGGTCGTCCCAAGAGATCATCTTCTAAAAATATTGTTGGATTCGATAATACGAATAGTGGTTAAGTATAA
Ro06-6124613	Ro06	6124613	C	G	ATTCGTTCTCCATCCAATTAATAAGTAGACCGGCCATCCTCTCTTCTCTCAGTTCTCTGTGGTTAGCACATACTTCAACATGCGTACGTAACAAATCTTA[C/G]AAGTTACAGCTGGTAAGTTTGTTCKCTTGGAGGGTTTTAAAACATAATTTGGCATTTGCTACAAAGAAAGAAGAAGAGAAAAACCAAATAATCTAATTAG
Ro06-6124638	Ro06	6124638	T	G	TAGACCGGCCATCCTCTCTTCTCTCAGTTCTCTGTGGTTAGCACATACTTCAACATGCGTACGTAACAAATCTTASAAGTTACAGCTGGTAAGTTTGTTC[T/G]CTTGGAGGGTTTTAAAACATAATTTGGCATTTGCTACAAAGAAAGAAGAAGAGAAAAACCAAATAATCTAATTAGTCTTGGTGGATTAACATAACATGAG
Ro06-6126172	Ro06	6126172	T	C	GTCGTCACGTGTTGAAGGTGTGACTTGAAGTTTGATTTCAAATTTGAACTTCTTTTTTTTGTCAAAGCTATACGACTTCATTTTCAATGATGCCCCCGAG[T/C]GTTGAATTTGTYGRAGTCGGTTTCTTGAATTTCAAGGAAACGYGGAGATTCACAATAAAAATCTCGACTTAAATTTAATAAAGATTTTTCTTGAGGCTCC
Ro06-6126184	Ro06	6126184	C	T	TGAAGGTGTGACTTGAAGTTTGATTTCAAATTTGAACTTCTTTTTTTTGTCAAAGCTATACGACTTCATTTTCAATGATGCCCCCGAGYGTTGAATTTGT[C/T]GRAGTCGGTTTCTTGAATTTCAAGGAAACGYGGAGATTCACAATAAAAATCTCGACTTAAATTTAATAAAGATTTTTCTTGAGGCTCCAAATGGGTATGT
Ro06-6126186	Ro06	6126186	G	A	AAGGTGTGACTTGAAGTTTGATTTCAAATTTGAACTTCTTTTTTTTGTCAAAGCTATACGACTTCATTTTCAATGATGCCCCCGAGYGTTGAATTTGTYG[G/A]AGTCGGTTTCTTGAATTTCAAGGAAACGYGGAGATTCACAATAAAAATCTCGACTTAAATTTAATAAAGATTTTTCTTGAGGCTCCAAATGGGTATGTGA
Ro06-6126215	Ro06	6126215	C	T	TTGAACTTCTTTTTTTTGTCAAAGCTATACGACTTCATTTTCAATGATGCCCCCGAGYGTTGAATTTGTYGRAGTCGGTTTCTTGAATTTCAAGGAAACG[C/T]GGAGATTCACAATAAAAATCTCGACTTAAATTTAATAAAGATTTTTCTTGAGGCTCCAAATGGGTATGTGATAAAACCCAAATATATAAGGAAGTTTCAC
Ro06-6126506	Ro06	6126506	A	C	GAATATGGCAAGTAATCAACCCGAACAAGAATGGGAAAGTTGATTAACATAATAAGACGATCCAAGTGGGCTTGATTTGATCAATCTTGAATCCATAATT[A/C]ATTTGGAGGTGTTTRACTATCTTTCTSCATATATRTGCATGCAATGGAGCATGAATATATAAGAAAGATTTGCCAAATATCTTGGACATTAAACTTTGGC
Ro06-6126521	Ro06	6126521	A	G	TCAACCCGAACAAGAATGGGAAAGTTGATTAACATAATAAGACGATCCAAGTGGGCTTGATTTGATCAATCTTGAATCCATAATTMATTTGGAGGTGTTT[A/G]ACTATCTTTCTSCATATATRTGCATGCAATGGAGCATGAATATATAAGAAAGATTTGCCAAATATCTTGGACATTAAACTTTGGCTCTTTGGAAGAAATA
Ro06-6126533	Ro06	6126533	G	C	AGAATGGGAAAGTTGATTAACATAATAAGACGATCCAAGTGGGCTTGATTTGATCAATCTTGAATCCATAATTMATTTGGAGGTGTTTRACTATCTTTCT[G/C]CATATATRTGCATGCAATGGAGCATGAATATATAAGAAAGATTTGCCAAATATCTTGGACATTAAACTTTGGCTCTTTGGAAGAAATATACAAGATTTTG
Ro06-6126541	Ro06	6126541	G	A	AAAGTTGATTAACATAATAAGACGATCCAAGTGGGCTTGATTTGATCAATCTTGAATCCATAATTMATTTGGAGGTGTTTRACTATCTTTCTSCATATAT[G/A]TGCATGCAATGGAGCATGAATATATAAGAAAGATTTGCCAAATATCTTGGACATTAAACTTTGGCTCTTTGGAAGAAATATACAAGATTTTGACAATTAA
Ro06-6142392	Ro06	6142392	T	G	AACTTCCACATAGAAAACTTCTTCATCGAGCAAGTCATCCGAAATCTCTCAGTCTGCAGGGATGTAAATGCCTTAGCTGGGATGTAAATGATCTCGTATT[T/G]ATTAAGGAGTAATGCCCATKTCRCCATTCGTCMTGTTAAGACCGGCTGCGACATAACAAACTTGACTGGATCAGCACGTGCCACTAAGTGCACTGTATAT
Ro06-6142412	Ro06	6142412	G	T	CTTCATCGAGCAAGTCATCCGAAATCTCTCAGTCTGCAGGGATGTAAATGCCTTAGCTGGGATGTAAATGATCTCGTATTKATTAAGGAGTAATGCCCAT[G/T]TCRCCATTCGTCMTGTTAAGACCGGCTGCGACATAACAAACTTGACTGGATCAGCACGTGCCACTAAGTGCACTGTATATGCTTGCATGTAGTGTCTTAA
Ro06-6142415	Ro06	6142415	A	G	CATCGAGCAAGTCATCCGAAATCTCTCAGTCTGCAGGGATGTAAATGCCTTAGCTGGGATGTAAATGATCTCGTATTKATTAAGGAGTAATGCCCATKTC[A/G]CCATTCGTCMTGTTAAGACCGGCTGCGACATAACAAACTTGACTGGATCAGCACGTGCCACTAAGTGCACTGTATATGCTTGCATGTAGTGTCTTAACTT
Ro06-6142425	Ro06	6142425	C	A	GTCATCCGAAATCTCTCAGTCTGCAGGGATGTAAATGCCTTAGCTGGGATGTAAATGATCTCGTATTKATTAAGGAGTAATGCCCATKTCRCCATTCGTC[C/A]TGTTAAGACCGGCTGCGACATAACAAACTTGACTGGATCAGCACGTGCCACTAAGTGCACTGTATATGCTTGCATGTAGTGTCTTAACTTATGGATGGCA
Ro06-6183315	Ro06	6183315	G	A	GTATATTTTATAGGCACTTGGATAAAACCTAAATTTTAATAATAGGCTGCTGTCTTCTACCTTATCTGAGTCTTTAATATACATATAGTAGACCCATATT[G/A]CCATGAGGAGTACGCAATTTCCGACTCATAAGCAAGCTTATATATACATGTGTGTGTATAATACTATGGAGAAAAAGAAAAGAAACAAAATGAAATTGAG
Ro06-6184436	Ro06	6184436	G	A	GAAGAATAGCCGGGATCACTGTTAGCATCATCTCCTTATCAGCTGGTTAAAGATGATCTTTATTCATGTGTTTAACATGGTATTAAGTAGAAATGTAGGA[G/A]GAGTCCTCAGAGTGTTTGACTATTTTATATTCATGAGTGAAACTATAATTTCAAGTACCTATGATTTTTTAATTGCATAAGTAACATGTGCATGTGATTA
Ro06-6186567	Ro06	6186567	T	C	CTTTGTATATTATCTATGCAGCAAACAAAGGAAGAACAATATCGGTTTGGAGATCAGATTGATGAGGTTGTCGAGAATGTTAAAAATGCTAACTGGCATG[T/C]CTCAAAAGCAGTAGTGATGTTGCTTCTGGGAACTATAGTTGCTGCTGTGGTTGCTGATCCCCTCGTTGATGCTGTTGACAACTTCTCAACAGCTACGAGC
Ro06-6208056	Ro06	6208056	C	T	TCCCTCTGCTACAACATATATATTCCCAAAGGCTATGATCAAGACTTAACTTGCCAACTAAATGATCATTCATGTATGCCTCTTGCTCAAAATCAACATC[C/T]AATCCAGAAATTGGAGCTTTAGAGAGACCTCCATTTTTGGAGATCTCCTAATGTGGTTTGAAGCACTCATATGAGTTGGAAATAGGCAATTCTTCTACAA
Ro06-6237967	Ro06	6237967	T	G	TGCTTATGTGTTTGTTTGTGTCGAGTATTATTGTGATGTTAAGCTCCTGCATGTGATTGCTCAAGTTATATAATTTACATATGAAGATACGTACGTACCT[T/G]GTCGAGTACGTAATCTTAACGCACGCTTGCACATCTTTTATCAGTGGTGATTATAAAGAGACATATCATGCAATCTTTATAGACGAATGTGCATAAGAAA
Ro06-6240485	Ro06	6240485	C	T	ACTTAAAATAAAAATTATACTTATTTTGAGAAAACATAAACATGCAGAATGAAAGTATATAAAATGTACAATAATTGATTGAAAACATAGGAAAAAAGTT[C/T]YWATTTTTTAAATCCTGTGATTGGCCTCCATTTAGCGCCCATACGAGAATTAATATTTAATAGGCGGGGAATTTTAGAACATTGGTATAAGGAGATCGTT
Ro06-6240486	Ro06	6240486	T	C	CTTAAAATAAAAATTATACTTATTTTGAGAAAACATAAACATGCAGAATGAAAGTATATAAAATGTACAATAATTGATTGAAAACATAGGAAAAAAGTTY[T/C]WATTTTTTAAATCCTGTGATTGGCCTCCATTTAGCGCCCATACGAGAATTAATATTTAATAGGCGGGGAATTTTAGAACATTGGTATAAGGAGATCGTTC
Ro06-6240487	Ro06	6240487	A	T	TTAAAATAAAAATTATACTTATTTTGAGAAAACATAAACATGCAGAATGAAAGTATATAAAATGTACAATAATTGATTGAAAACATAGGAAAAAAGTTYY[A/T]ATTTTTTAAATCCTGTGATTGGCCTCCATTTAGCGCCCATACGAGAATTAATATTTAATAGGCGGGGAATTTTAGAACATTGGTATAAGGAGATCGTTCA
Ro06-6242758	Ro06	6242758	T	C	TTTACTCTTGGGTGCCCAATGGTTACACAACCTAGGCTTTATCGGATGAAATTTCTTGGAAATGATTATGGTCTTTATTGTTGAGGTTCGATGACATGTG[T/C]TAAAGGGCCTTACTGCATCCAACAACCCATTARCCAGTYAAGACCTTTCGGCCTGACTTCCTTTTGAACAACTATATCCCATGACCCATTTGCTGATATC
Ro06-6242791	Ro06	6242791	A	G	AGGCTTTATCGGATGAAATTTCTTGGAAATGATTATGGTCTTTATTGTTGAGGTTCGATGACATGTGYTAAAGGGCCTTACTGCATCCAACAACCCATTA[A/G]CCAGTYAAGACCTTTCGGCCTGACTTCCTTTTGAACAACTATATCCCATGACCCATTTGCTGATATCTACACCCAAAGTTCCTTCCAATACACCCTAATC
Ro06-6242797	Ro06	6242797	C	T	TATCGGATGAAATTTCTTGGAAATGATTATGGTCTTTATTGTTGAGGTTCGATGACATGTGYTAAAGGGCCTTACTGCATCCAACAACCCATTARCCAGT[C/T]AAGACCTTTCGGCCTGACTTCCTTTTGAACAACTATATCCCATGACCCATTTGCTGATATCTACACCCAAAGTTCCTTCCAATACACCCTAATCTCTTRT
Ro06-6242896	Ro06	6242896	G	A	TYAAGACCTTTCGGCCTGACTTCCTTTTGAACAACTATATCCCATGACCCATTTGCTGATATCTACACCCAAAGTTCCTTCCAATACACCCTAATCTCTT[G/A]TTGTTCAACACTTAATCACCACTTTTGAAGATCTGTTTGAACCATCATCCACGCTACAACCTTCAAGAGAAACTTGTAGTTTTTGTGAAAATTCTGGCAT
Ro06-6243023	Ro06	6243023	A	G	GAAGATCTGTTTGAACCATCATCCACGCTACAACCTTCAAGAGAAACTTGTAGTTTTTGTGAAAATTCTGGCATGCACCGAAGTGCATATGCACTTAGCT[A/G]GTCTTASCCRTTGGATAARCCAACTYTTCATCCAACCACACACCCCCTGCATGCACACTGTTTGATCGTCCACCGCTGCATGTCAGCCATTAGATCGACG
Ro06-6243030	Ro06	6243030	C	G	TGTTTGAACCATCATCCACGCTACAACCTTCAAGAGAAACTTGTAGTTTTTGTGAAAATTCTGGCATGCACCGAAGTGCATATGCACTTAGCTRGTCTTA[C/G]CCRTTGGATAARCCAACTYTTCATCCAACCACACACCCCCTGCATGCACACTGTTTGATCGTCCACCGCTGCATGTCAGCCATTAGATCGACGATGCACT
Ro06-6243033	Ro06	6243033	A	G	TTGAACCATCATCCACGCTACAACCTTCAAGAGAAACTTGTAGTTTTTGTGAAAATTCTGGCATGCACCGAAGTGCATATGCACTTAGCTRGTCTTASCC[A/G]TTGGATAARCCAACTYTTCATCCAACCACACACCCCCTGCATGCACACTGTTTGATCGTCCACCGCTGCATGTCAGCCATTAGATCGACGATGCACTTCG
Ro06-6243042	Ro06	6243042	A	G	CATCCACGCTACAACCTTCAAGAGAAACTTGTAGTTTTTGTGAAAATTCTGGCATGCACCGAAGTGCATATGCACTTAGCTRGTCTTASCCRTTGGATAA[A/G]CCAACTYTTCATCCAACCACACACCCCCTGCATGCACACTGTTTGATCGTCCACCGCTGCATGTCAGCCATTAGATCGACGATGCACTTCGGTGCATGCA
Ro06-6243049	Ro06	6243049	C	T	GCTACAACCTTCAAGAGAAACTTGTAGTTTTTGTGAAAATTCTGGCATGCACCGAAGTGCATATGCACTTAGCTRGTCTTASCCRTTGGATAARCCAACT[C/T]TTCATCCAACCACACACCCCCTGCATGCACACTGTTTGATCGTCCACCGCTGCATGTCAGCCATTAGATCGACGATGCACTTCGGTGCATGCAACACTCT
Ro06-6299896	Ro06	6299896	G	T	ATAAATATTTTGACGAGGATAAGGTCGACATACATCGCTCTTTTAAGTTAAGTAAAGATTGGATCTCCACCTCAACCAAGATTCTCTTCCACTTAAAAAA[G/T]GTCAAAAAGAGAAAATGAATATCAATATCTTTGATCCAAGAGAAAAAAGCTTGGGCAAGAATATTCTTTTCAGTTGCAATGCATTAAACTATCACGCTAT
Ro06-6323343	Ro06	6323343	A	G	TTTTCTAAGTTATTTTCATGCCAATCACGGTCCATGAAAACTCTTGATTTATTAACTTAAGTCATATTATGATCTTTGAGTTAACAAATTAAGGCGTAAA[A/G]CATTGRCATATAGAAAATCAAACAAGGCAAGYCTCACACTCATACTCATCATGTTCATTGTCATTTGTCTAGAATTAATAAGGTTGTCATGCTTACAAAC
Ro06-6323349	Ro06	6323349	A	G	AAGTTATTTTCATGCCAATCACGGTCCATGAAAACTCTTGATTTATTAACTTAAGTCATATTATGATCTTTGAGTTAACAAATTAAGGCGTAAARCATTG[A/G]CATATAGAAAATCAAACAAGGCAAGYCTCACACTCATACTCATCATGTTCATTGTCATTTGTCTAGAATTAATAAGGTTGTCATGCTTACAAACTCAYAC
Ro06-6323375	Ro06	6323375	T	C	CATGAAAACTCTTGATTTATTAACTTAAGTCATATTATGATCTTTGAGTTAACAAATTAAGGCGTAAARCATTGRCATATAGAAAATCAAACAAGGCAAG[T/C]CTCACACTCATACTCATCATGTTCATTGTCATTTGTCTAGAATTAATAAGGTTGTCATGCTTACAAACTCAYACCAAAATGGATTAAACACATGCTCATG
Ro06-6323447	Ro06	6323447	C	T	TGRCATATAGAAAATCAAACAAGGCAAGYCTCACACTCATACTCATCATGTTCATTGTCATTTGTCTAGAATTAATAAGGTTGTCATGCTTACAAACTCA[C/T]ACCAAAATGGATTAAACACATGCTCATGAATTTGACATATTCCTAAGCAAACATCTAACACAAATAGATAATAAACATATCTAAGAATCAACCAACATGC
Ro06-6329859	Ro06	6329859	G	T	ACCTAATAATATGAATCGATCTTACAATAAAACATTCAATTGGCACATGCCTTTTGAATTGTCTCATCAATATCATCCAACTAGCAAAGCCAGAAGAATA[G/T]ACATACTTCATYATACCGATGGCGAGACCATGAAAAGAAAATGTGTTCCCCCCAGTAAGATTGAATGGGTGAAAACCAAGAAACCTGAGCTCCACCAAAG
Ro06-6329871	Ro06	6329871	T	C	GAATCGATCTTACAATAAAACATTCAATTGGCACATGCCTTTTGAATTGTCTCATCAATATCATCCAACTAGCAAAGCCAGAAGAATAKACATACTTCAT[T/C]ATACCGATGGCGAGACCATGAAAAGAAAATGTGTTCCCCCCAGTAAGATTGAATGGGTGAAAACCAAGAAACCTGAGCTCCACCAAAGTCGAAAGAATTT
Ro06-6366083	Ro06	6366083	G	T	CAATATAGTTGTCAAAAGAGAATTCACGTTTATGCATTGCTTGGGGATATTTTTCAGCTTTTATAACAGTGTTGATAATGACGGGTATCTTAAATAACAT[G/T]CTCAGATTAGATGCTATCTGTWATAYCARTAAGGGTTGGAGGATGGTTGAATGGTTGCAAGATCATTTATCTCTACACAAACATCTAGACATAGGGTTTA
Ro06-6366105	Ro06	6366105	T	A	TTCACGTTTATGCATTGCTTGGGGATATTTTTCAGCTTTTATAACAGTGTTGATAATGACGGGTATCTTAAATAACATKCTCAGATTAGATGCTATCTGT[T/A]ATAYCARTAAGGGTTGGAGGATGGTTGAATGGTTGCAAGATCATTTATCTCTACACAAACATCTAGACATAGGGTTTAGATCAGATTCAAGCGTGGGATG
Ro06-6366109	Ro06	6366109	C	T	CGTTTATGCATTGCTTGGGGATATTTTTCAGCTTTTATAACAGTGTTGATAATGACGGGTATCTTAAATAACATKCTCAGATTAGATGCTATCTGTWATA[C/T]CARTAAGGGTTGGAGGATGGTTGAATGGTTGCAAGATCATTTATCTCTACACAAACATCTAGACATAGGGTTTAGATCAGATTCAAGCGTGGGATGCAAA
Ro06-6366112	Ro06	6366112	A	G	TTATGCATTGCTTGGGGATATTTTTCAGCTTTTATAACAGTGTTGATAATGACGGGTATCTTAAATAACATKCTCAGATTAGATGCTATCTGTWATAYCA[A/G]TAAGGGTTGGAGGATGGTTGAATGGTTGCAAGATCATTTATCTCTACACAAACATCTAGACATAGGGTTTAGATCAGATTCAAGCGTGGGATGCAAATCT
Ro06-6383484	Ro06	6383484	A	T	TCTTGGCAAGGACCAATATCCCAATTTCAATAGCAAACTGGACAAGCAAAAAAATTTTGACTGAAAAAAACACCATTTGGGAGACAATTCTGGTATGGAC[A/T]CKCACATTAATTTAGCTGCATGCATTCTTGTATCTTAGCCTCACTAATGCATATTAGTTTATTCATTTGACATGTATGCAGACCACATTCGATTTAGGAC
Ro06-6383486	Ro06	6383486	T	G	TTGGCAAGGACCAATATCCCAATTTCAATAGCAAACTGGACAAGCAAAAAAATTTTGACTGAAAAAAACACCATTTGGGAGACAATTCTGGTATGGACWC[T/G]CACATTAATTTAGCTGCATGCATTCTTGTATCTTAGCCTCACTAATGCATATTAGTTTATTCATTTGACATGTATGCAGACCACATTCGATTTAGGACCT
Ro06-6404854	Ro06	6404854	C	T	ATTGCATAAAACAGATGAACCAACAATGTGACTTCATCCAATCATCCAACTATGAAACCTCCATTTGAATTGCAGCATCTGTCGTACGAAAGCCTTTTCT[C/T]GTTTTCTTTATGTCCATACAGTTACATGAAGTTTAACACATACTTCAAGTAAAGATCATCGTGATTGGCACAATTTTGACTAAATGTAAATTCACATCAG
Ro06-6407509	Ro06	6407509	A	T	GAATCACTTCAGAACGTGGCAATACACATATATTATTGCACGTAAGTTTTGCTATACTGTTTTAAGTTTTTAACAACCACCGGCTTGTTTTTCTTAAAAT[A/T]ATGACATTTCTTCTTCTAGTAYCTTCTATATATGTTATAAGTCAATGCTAAGATGGACAAAGATGATCTACCTTGCAAGTTAGAAATGGATAAGAAATAT
Ro06-6407531	Ro06	6407531	T	C	TACACATATATTATTGCACGTAAGTTTTGCTATACTGTTTTAAGTTTTTAACAACCACCGGCTTGTTTTTCTTAAAATWATGACATTTCTTCTTCTAGTA[T/C]CTTCTATATATGTTATAAGTCAATGCTAAGATGGACAAAGATGATCTACCTTGCAAGTTAGAAATGGATAAGAAATATAACCAAAGGTATCTTTAAATTG
Ro06-6423080	Ro06	6423080	T	G	TTTATGAAGGCAATATTTTTGTTAATACGAGAAACTAGCTAGTTGCACAAACATGCTACATCTTGTTTCTATTAATCAGACATGCTACATCCTGTTGTAT[T/G]CATCTTTTCAGTTACAGGTGACAGTCATAGAAGCTAAATGATCTGGGAAATTGAGGGGACTAATATGAGTAATTCYAGATAAAGATTGCACAAACTCATG
Ro06-6423156	Ro06	6423156	C	T	CAGACATGCTACATCCTGTTGTATKCATCTTTTCAGTTACAGGTGACAGTCATAGAAGCTAAATGATCTGGGAAATTGAGGGGACTAATATGAGTAATTC[C/T]AGATAAAGATTGCACAAACTCATGTAGCCTGGGTGACAGTCGTAGAAGCTAAAAGATCTGAGAAATTGAGGGGACTAATATGAGTAATTCCAGGTACAGA
Ro06-6439458	Ro06	6439458	A	G	CTTTGCATGACCTTGATGGCTGATTCCAATCCCTACCCCTAAAAATTTTCACATCAACATTAAGAGTCAAATCTAGATGTGAGTTTTTTATTTATACGAC[A/G]TAACRTAACATGTCAAATATTTGATAAAAGTCGTTCCACGTTTAAACTCGCTTAAGAAGAATTAAAAAATAGAGTTTACTCACTCGTAATGAATTGGAGA
Ro06-6439463	Ro06	6439463	A	G	CATGACCTTGATGGCTGATTCCAATCCCTACCCCTAAAAATTTTCACATCAACATTAAGAGTCAAATCTAGATGTGAGTTTTTTATTTATACGACRTAAC[A/G]TAACATGTCAAATATTTGATAAAAGTCGTTCCACGTTTAAACTCGCTTAAGAAGAATTAAAAAATAGAGTTTACTCACTCGTAATGAATTGGAGAGATCC
Ro06-6501274	Ro06	6501274	T	C	TTTCCAACCATAATCCTCAACGAGTTCACAAGAGTTATAATCAGGAGAATAAAAATTATAGTAAGGCTTACAGAATTTGCTAAGTGTTTAACATGCACAT[T/C]TCAKTCATGCTCGGGTGAAGTGTGTGGAAAYCRAGTGTAYAATTAATWTCAAKCAATCMAATAGGCACATMTAAACAACATTAACCACTAAASCTCACAA
Ro06-6501278	Ro06	6501278	T	G	CAACCATAATCCTCAACGAGTTCACAAGAGTTATAATCAGGAGAATAAAAATTATAGTAAGGCTTACAGAATTTGCTAAGTGTTTAACATGCACATYTCA[T/G]TCATGCTCGGGTGAAGTGTGTGGAAAYCRAGTGTAYAATTAATWTCAAKCAATCMAATAGGCACATMTAAACAACATTAACCACTAAASCTCACAATAAT
Ro06-6501305	Ro06	6501305	C	T	GAGTTATAATCAGGAGAATAAAAATTATAGTAAGGCTTACAGAATTTGCTAAGTGTTTAACATGCACATYTCAKTCATGCTCGGGTGAAGTGTGTGGAAA[C/T]CRAGTGTAYAATTAATWTCAAKCAATCMAATAGGCACATMTAAACAACATTAACCACTAAASCTCACAATAATCACTAAATATTTTCGCTCAGTGTTTAG
Ro06-6501307	Ro06	6501307	G	A	GTTATAATCAGGAGAATAAAAATTATAGTAAGGCTTACAGAATTTGCTAAGTGTTTAACATGCACATYTCAKTCATGCTCGGGTGAAGTGTGTGGAAAYC[G/A]AGTGTAYAATTAATWTCAAKCAATCMAATAGGCACATMTAAACAACATTAACCACTAAASCTCACAATAATCACTAAATATTTTCGCTCAGTGTTTAGGG
Ro06-6501314	Ro06	6501314	C	T	TCAGGAGAATAAAAATTATAGTAAGGCTTACAGAATTTGCTAAGTGTTTAACATGCACATYTCAKTCATGCTCGGGTGAAGTGTGTGGAAAYCRAGTGTA[C/T]AATTAATWTCAAKCAATCMAATAGGCACATMTAAACAACATTAACCACTAAASCTCACAATAATCACTAAATATTTTCGCTCAGTGTTTAGGGTTAAGTG
Ro06-6501322	Ro06	6501322	T	A	ATAAAAATTATAGTAAGGCTTACAGAATTTGCTAAGTGTTTAACATGCACATYTCAKTCATGCTCGGGTGAAGTGTGTGGAAAYCRAGTGTAYAATTAAT[T/A]TCAAKCAATCMAATAGGCACATMTAAACAACATTAACCACTAAASCTCACAATAATCACTAAATATTTTCGCTCAGTGTTTAGGGTTAAGTGTTTACTCT
Ro06-6501327	Ro06	6501327	G	T	AATTATAGTAAGGCTTACAGAATTTGCTAAGTGTTTAACATGCACATYTCAKTCATGCTCGGGTGAAGTGTGTGGAAAYCRAGTGTAYAATTAATWTCAA[G/T]CAATCMAATAGGCACATMTAAACAACATTAACCACTAAASCTCACAATAATCACTAAATATTTTCGCTCAGTGTTTAGGGTTAAGTGTTTACTCTCATAA
Ro06-6501333	Ro06	6501333	C	A	AGTAAGGCTTACAGAATTTGCTAAGTGTTTAACATGCACATYTCAKTCATGCTCGGGTGAAGTGTGTGGAAAYCRAGTGTAYAATTAATWTCAAKCAATC[C/A]AATAGGCACATMTAAACAACATTAACCACTAAASCTCACAATAATCACTAAATATTTTCGCTCAGTGTTTAGGGTTAAGTGTTTACTCTCATAACAATTG
Ro06-6501345	Ro06	6501345	C	A	AGAATTTGCTAAGTGTTTAACATGCACATYTCAKTCATGCTCGGGTGAAGTGTGTGGAAAYCRAGTGTAYAATTAATWTCAAKCAATCMAATAGGCACAT[C/A]TAAACAACATTAACCACTAAASCTCACAATAATCACTAAATATTTTCGCTCAGTGTTTAGGGTTAAGTGTTTACTCTCATAACAATTGCACAAGTAGTGT
Ro06-6501367	Ro06	6501367	C	G	TGCACATYTCAKTCATGCTCGGGTGAAGTGTGTGGAAAYCRAGTGTAYAATTAATWTCAAKCAATCMAATAGGCACATMTAAACAACATTAACCACTAAA[C/G]CTCACAATAATCACTAAATATTTTCGCTCAGTGTTTAGGGTTAAGTGTTTACTCTCATAACAATTGCACAAGTAGTGTTCCCATAGGCTTGCTCGTTGAC
Ro06-6523716	Ro06	6523716	G	A	CGACTCACCTTGTTTTATTAATTGACTACTTCTCTTTGTTAACTACTTTGAAGATACATGCAGTATTAAAGAACTGTTAGATAAATAGACCGAAAAGCTT[G/A]GCACATATTAAATCTAATCATGGTCTTTTTCACTGTTAATTTAAGTCCATTGACTTTTTGATGAAGATAAAACACAAGAAGCAAAAGAAATACAAAACGT
Ro06-6525263	Ro06	6525263	A	G	CAGAAACAGGCTGATTAGCAACAGCCTTAAGAAGGGCTAGTTCATTGTCTGCAGGCACATCTTCGTAGCCAGTTATGTTGGCTACAGGGCTGGCTCCCTC[A/G]CTGGTAATGTTGCATGTGTCATCTAAACCGGTGTAGGGGTAATTAGCCTCGGTAGTAAGTCCATTTTGCGTGATGAATTCAAAGGCATCGTCAGTTAAGC
Ro06-6539455	Ro06	6539455	A	G	CGCTACAAATATATATATATATATATAGACAATCACACGCGATGGAACAATTAAGGAATTACAGATTGAAAATTCAATCAAGGTGAATTAATGAAGCATT[A/G]AAATACCTTTATTTCGTCCCAGAATCGCAGCATGCAACGGGAAATGCAACGGGAACTTGCCTTGTACGTTGAAGTTGATAGGATGTGGCATGCACTGATC
Ro06-6543298	Ro06	6543298	G	C	AAAAAAGTGCATGCCTTGCTTTTCTACCATACCATCTCTCACTGGTATTTTTGTTCGTAAGTGTTGAGATTGTACGTTGAACACTCATCTCTCAAGAAAG[G/C]AATTGAATACTTTGTGAGAATTTGAGAAGATCCATAGGAATTTGTGATTTGAGTTTGTTCCCAGTTTCAACTTGTGCTTGTAGCAATTGTGTGTTTGCAT
Ro06-6543408	Ro06	6543408	C	T	CTTTGTGAGAATTTGAGAAGATCCATAGGAATTTGTGATTTGAGTTTGTTCCCAGTTTCAACTTGTGCTTGTAGCAATTGTGTGTTTGCATGCAGTATAG[C/T]TTGTGTCGAGTTTTGGTCTCATTTAACGTMCTTCTATTTGATTCTYTRCATAATTGMTGTAGTTTYTGCATTTWGGACTSATATTGTGTTTCTATCMTAA
Ro06-6543438	Ro06	6543438	A	C	ATTTGTGATTTGAGTTTGTTCCCAGTTTCAACTTGTGCTTGTAGCAATTGTGTGTTTGCATGCAGTATAGYTTGTGTCGAGTTTTGGTCTCATTTAACGT[A/C]CTTCTATTTGATTCTYTRCATAATTGMTGTAGTTTYTGCATTTWGGACTSATATTGTGTTTCTATCMTAATTTAGGATTCCTGCTCAAGATCAATCATGT
Ro06-6543454	Ro06	6543454	C	T	TGTTCCCAGTTTCAACTTGTGCTTGTAGCAATTGTGTGTTTGCATGCAGTATAGYTTGTGTCGAGTTTTGGTCTCATTTAACGTMCTTCTATTTGATTCT[C/T]TRCATAATTGMTGTAGTTTYTGCATTTWGGACTSATATTGTGTTTCTATCMTAATTTAGGATTCCTGCTCAAGATCAATCATGTTTTCTGCATTGTTTTT
Ro06-6543456	Ro06	6543456	G	A	TTCCCAGTTTCAACTTGTGCTTGTAGCAATTGTGTGTTTGCATGCAGTATAGYTTGTGTCGAGTTTTGGTCTCATTTAACGTMCTTCTATTTGATTCTYT[G/A]CATAATTGMTGTAGTTTYTGCATTTWGGACTSATATTGTGTTTCTATCMTAATTTAGGATTCCTGCTCAAGATCAATCATGTTTTCTGCATTGTTTTTCA
Ro06-6543465	Ro06	6543465	C	A	TCAACTTGTGCTTGTAGCAATTGTGTGTTTGCATGCAGTATAGYTTGTGTCGAGTTTTGGTCTCATTTAACGTMCTTCTATTTGATTCTYTRCATAATTG[C/A]TGTAGTTTYTGCATTTWGGACTSATATTGTGTTTCTATCMTAATTTAGGATTCCTGCTCAAGATCAATCATGTTTTCTGCATTGTTTTTCATTATCGTAA
Ro06-6543474	Ro06	6543474	C	T	GCTTGTAGCAATTGTGTGTTTGCATGCAGTATAGYTTGTGTCGAGTTTTGGTCTCATTTAACGTMCTTCTATTTGATTCTYTRCATAATTGMTGTAGTTT[C/T]TGCATTTWGGACTSATATTGTGTTTCTATCMTAATTTAGGATTCCTGCTCAAGATCAATCATGTTTTCTGCATTGTTTTTCATTATCGTAACATAGAGTG
Ro06-6543482	Ro06	6543482	T	A	CAATTGTGTGTTTGCATGCAGTATAGYTTGTGTCGAGTTTTGGTCTCATTTAACGTMCTTCTATTTGATTCTYTRCATAATTGMTGTAGTTTYTGCATTT[T/A]GGACTSATATTGTGTTTCTATCMTAATTTAGGATTCCTGCTCAAGATCAATCATGTTTTCTGCATTGTTTTTCATTATCGTAACATAGAGTGAATCATGA
Ro06-6543488	Ro06	6543488	C	G	TGTGTTTGCATGCAGTATAGYTTGTGTCGAGTTTTGGTCTCATTTAACGTMCTTCTATTTGATTCTYTRCATAATTGMTGTAGTTTYTGCATTTWGGACT[C/G]ATATTGTGTTTCTATCMTAATTTAGGATTCCTGCTCAAGATCAATCATGTTTTCTGCATTGTTTTTCATTATCGTAACATAGAGTGAATCATGATCTGAG
Ro06-6543505	Ro06	6543505	C	A	TAGYTTGTGTCGAGTTTTGGTCTCATTTAACGTMCTTCTATTTGATTCTYTRCATAATTGMTGTAGTTTYTGCATTTWGGACTSATATTGTGTTTCTATC[C/A]TAATTTAGGATTCCTGCTCAAGATCAATCATGTTTTCTGCATTGTTTTTCATTATCGTAACATAGAGTGAATCATGATCTGAGATTGAGATAACTTCAGT
Ro06-6544662	Ro06	6544662	A	G	TGTCCTTTCCAGGCAAAAAGGGGGAGAAATTTGTGGATTAATGTTTCATATACTTATCACATTTCTGCCATACATGCACTTGTTCTTCACAGGGTATTGT[A/G]TTTTTCTTGTGTGCAGKTTACACAGGAMTGAAGTTGATCTCTTAGATTGATCATTATACTGTAGGATCAACTATTATGTATTGTTGAGTGTATATGTTGT
Ro06-6544679	Ro06	6544679	T	G	AAGGGGGAGAAATTTGTGGATTAATGTTTCATATACTTATCACATTTCTGCCATACATGCACTTGTTCTTCACAGGGTATTGTRTTTTTCTTGTGTGCAG[T/G]TTACACAGGAMTGAAGTTGATCTCTTAGATTGATCATTATACTGTAGGATCAACTATTATGTATTGTTGAGTGTATATGTTGTTTTGCCTAGGAAATGCC
Ro06-6544690	Ro06	6544690	C	A	ATTTGTGGATTAATGTTTCATATACTTATCACATTTCTGCCATACATGCACTTGTTCTTCACAGGGTATTGTRTTTTTCTTGTGTGCAGKTTACACAGGA[C/A]TGAAGTTGATCTCTTAGATTGATCATTATACTGTAGGATCAACTATTATGTATTGTTGAGTGTATATGTTGTTTTGCCTAGGAAATGCCAAAGAGGGAGA
Ro06-6551483	Ro06	6551483	T	G	TAAATCTTTATTCTTTTGTATGTTTCTTTGATTGATCACCTTAGGAGCATGTATTAGGATTGACCAGCCATAAACATATGTTTGATGACCCATATATGCA[T/G]GTGTTTAACTTGTGGTGCGACAAGTGCTACGGTGTTTGTATGAAATCATTTTTAGGATACTTAGGATACACACCATGTTCTAAGATTCTTACCTTGTTCA
Ro06-6620946	Ro06	6620946	C	T	TAGAGTTGGAAATCGGAGCCACTAGCATCAATGGCAACAGAAACAGGTTGACTAGCCACAGCCTTAACAACGGCTTGTTCACTGTTTGCAGGCACGTCTA[C/T]GTTGCCCGTTATCGAGGTTGCAKGGCTCGCTTCCTTCTTTGCATTGCATGTACCATCAACACCTGTACGTGTATGGATAATTAGCTGCGGTATACTAAGT
Ro06-6620969	Ro06	6620969	G	T	AGCATCAATGGCAACAGAAACAGGTTGACTAGCCACAGCCTTAACAACGGCTTGTTCACTGTTTGCAGGCACGTCTAYGTTGCCCGTTATCGAGGTTGCA[G/T]GGCTCGCTTCCTTCTTTGCATTGCATGTACCATCAACACCTGTACGTGTATGGATAATTAGCTGCGGTATACTAAGTCCATCATTTTGGTACTAAGTCCT
Ro06-6639623	Ro06	6639623	G	A	TCCTCATTAAAGCGCCTTAACATCTTCTGGATGTAATTCGATTAATGGACAAGAATTTCATTTGCATGGTGCTCGAGCTCCAGGCCGAGATATAATTTCA[G/A]TTTCCTAAGATCATTCATCTCAAATTTTGACTTCAGGTGCTTACCTTTTTCTCTCTTTTTTAAGAGAATCAAATGATTTCACTCCTACCCCATGACCTGG
Ro06-6688724	Ro06	6688724	G	A	CCGTAACGCCATGGTCTAGGCTGGTTCCACAAGTTCCAGTGAAAACACCACTCGAATAGAATTGGAAATCAGATCCGCTAGCATCAATGGCAACAGAGAT[G/A]GGTTGATTAGCAACAGCTTTAAGAAGGGCRCTTTCACTGTTTGCAGGCACATCTTCGTGGCCAGTTATTGAGGCTGCATGGCTTGCTTCCTTCTTGGCAT
Ro06-6688754	Ro06	6688754	G	A	AAGTTCCAGTGAAAACACCACTCGAATAGAATTGGAAATCAGATCCGCTAGCATCAATGGCAACAGAGATRGGTTGATTAGCAACAGCTTTAAGAAGGGC[G/A]CTTTCACTGTTTGCAGGCACATCTTCGTGGCCAGTTATTGAGGCTGCATGGCTTGCTTCCTTCTTGGCATTGCATGTACCATCAACACCGGTGTAGGGGT
Ro06-6694347	Ro06	6694347	G	A	CAGCCGTAACGCCATGGTCTAGGCTGGTTCCACAAGTTCCAGTGAAAACACCACTTGAATAGAACTGGAAATCAGATCCGCTAGCATCAATGGCAACAGA[G/A]ATGGGTTGATTAGCAACAGCCTTAAGAAGGGCGCTTTCACTGTTTGCAGGCACATCTTCGTGGCCAGTTATCGAGGCTGCATGGCTTGCTTCCTTCTTGG
Ro06-6695905	Ro06	6695905	G	A	TTGGGCATGCCCATATTGGACTGGGACAAGAAGAAGGCAAACATTTCACTTCTACCATTAAATCATTGCATATTTATTATCAGAGTTGTAATAGGGGAGT[G/A]CACTWMTTTTTCCTCTCTTACTCTAGTAAAAGAAAAGCTCGGCGCATCAGTAKTGTCCTAGGCTCCTAGCTCATCAGTGGCAACCATGTCCTCCAGAGAA
Ro06-6695910	Ro06	6695910	T	A	CATGCCCATATTGGACTGGGACAAGAAGAAGGCAAACATTTCACTTCTACCATTAAATCATTGCATATTTATTATCAGAGTTGTAATAGGGGAGTRCACT[T/A]MTTTTTCCTCTCTTACTCTAGTAAAAGAAAAGCTCGGCGCATCAGTAKTGTCCTAGGCTCCTAGCTCATCAGTGGCAACCATGTCCTCCAGAGAAAAAGT
Ro06-6695911	Ro06	6695911	C	A	ATGCCCATATTGGACTGGGACAAGAAGAAGGCAAACATTTCACTTCTACCATTAAATCATTGCATATTTATTATCAGAGTTGTAATAGGGGAGTRCACTW[C/A]TTTTTCCTCTCTTACTCTAGTAAAAGAAAAGCTCGGCGCATCAGTAKTGTCCTAGGCTCCTAGCTCATCAGTGGCAACCATGTCCTCCAGAGAAAAAGTA
Ro06-6695958	Ro06	6695958	T	G	ACCATTAAATCATTGCATATTTATTATCAGAGTTGTAATAGGGGAGTRCACTWMTTTTTCCTCTCTTACTCTAGTAAAAGAAAAGCTCGGCGCATCAGTA[T/G]TGTCCTAGGCTCCTAGCTCATCAGTGGCAACCATGTCCTCCAGAGAAAAAGTATCCGGGTACAGCCGCACATAAGCATGCTGACTGAATATTGGCAGATC
Ro06-6701242	Ro06	6701242	A	G	AACAAAGAAAAGAAGCCAGAGAATAAAATTAAGTAGGAATCACCAACAGCCAAGAGCAGAAGGTGGAGGGTCTTAGCCTAAATAGCTGGCAAGTTATTTG[A/G]TGCCAATCACGTTGCATTCGTCTAACTCGTTAAACAGTTTATAACCAAACACAATATCCAATCCAATCTGATTGAATTCTCCAACTCTAAGCCTATGTTT
Ro06-6703262	Ro06	6703262	T	C	AATTTCTTCGATTCGATGTGGCTCTAATCGATCTATGCTCTGGCGTTTTCATCTGGTGGCCTTGGCTCTTTGGATTCAAGTGATCGGCGTGATCTGGTGG[T/C]TTCACYAGTGTAKGGGTCAGCTCAAGGTAAACCTCTGGTCTGGGTCMTGGAAGATCATGGCGGTGGTGAGGCTTTGGTCGAGCATGCTGCGGTGACCAGT
Ro06-6703268	Ro06	6703268	C	T	TTCGATTCGATGTGGCTCTAATCGATCTATGCTCTGGCGTTTTCATCTGGTGGCCTTGGCTCTTTGGATTCAAGTGATCGGCGTGATCTGGTGGYTTCAC[C/T]AGTGTAKGGGTCAGCTCAAGGTAAACCTCTGGTCTGGGTCMTGGAAGATCATGGCGGTGGTGAGGCTTTGGTCGAGCATGCTGCGGTGACCAGTGGTTCT
Ro06-6703275	Ro06	6703275	G	T	CGATGTGGCTCTAATCGATCTATGCTCTGGCGTTTTCATCTGGTGGCCTTGGCTCTTTGGATTCAAGTGATCGGCGTGATCTGGTGGYTTCACYAGTGTA[G/T]GGGTCAGCTCAAGGTAAACCTCTGGTCTGGGTCMTGGAAGATCATGGCGGTGGTGAGGCTTTGGTCGAGCATGCTGCGGTGACCAGTGGTTCTTAGCTAT
Ro06-6703309	Ro06	6703309	A	C	TTCATCTGGTGGCCTTGGCTCTTTGGATTCAAGTGATCGGCGTGATCTGGTGGYTTCACYAGTGTAKGGGTCAGCTCAAGGTAAACCTCTGGTCTGGGTC[A/C]TGGAAGATCATGGCGGTGGTGAGGCTTTGGTCGAGCATGCTGCGGTGACCAGTGGTTCTTAGCTATTCAGATCTCGTTCTCTCTGGGTTTCCTGGCCTTC
Ro06-6703436	Ro06	6703436	T	C	TTGGTCGAGCATGCTGCGGTGACCAGTGGTTCTTAGCTATTCAGATCTCGTTCTCTCTGGGTTTCCTGGCCTTCGGTGCCCTTAAGAATTGGCCGGGTTG[T/C]GCAAATCTTTGGATAATATTATTGTTTGGGTCTRTTGTGCCCTTGGTATGATGAGATTTTATTMTTCAAGGATTACAATTTGGAATCYCGGAGGAATTCA
Ro06-6703470	Ro06	6703470	A	G	AGCTATTCAGATCTCGTTCTCTCTGGGTTTCCTGGCCTTCGGTGCCCTTAAGAATTGGCCGGGTTGYGCAAATCTTTGGATAATATTATTGTTTGGGTCT[A/G]TTGTGCCCTTGGTATGATGAGATTTTATTMTTCAAGGATTACAATTTGGAATCYCGGAGGAATTCATTCCTGTAAAGCAGTTCAARGCGATWTAATACAC
Ro06-6703500	Ro06	6703500	A	C	CCTGGCCTTCGGTGCCCTTAAGAATTGGCCGGGTTGYGCAAATCTTTGGATAATATTATTGTTTGGGTCTRTTGTGCCCTTGGTATGATGAGATTTTATT[A/C]TTCAAGGATTACAATTTGGAATCYCGGAGGAATTCATTCCTGTAAAGCAGTTCAARGCGATWTAATACACATGTCTCAAGATCATGACAATAGTTCCTTT
Ro06-6703524	Ro06	6703524	C	T	TTGGCCGGGTTGYGCAAATCTTTGGATAATATTATTGTTTGGGTCTRTTGTGCCCTTGGTATGATGAGATTTTATTMTTCAAGGATTACAATTTGGAATC[C/T]CGGAGGAATTCATTCCTGTAAAGCAGTTCAARGCGATWTAATACACATGTCTCAAGATCATGACAATAGTTCCTTTTCTGTTGTTGGTAATTATCTTGTG
Ro06-6703556	Ro06	6703556	A	G	TATTGTTTGGGTCTRTTGTGCCCTTGGTATGATGAGATTTTATTMTTCAAGGATTACAATTTGGAATCYCGGAGGAATTCATTCCTGTAAAGCAGTTCAA[A/G]GCGATWTAATACACATGTCTCAAGATCATGACAATAGTTCCTTTTCTGTTGTTGGTAATTATCTTGTGGATGCTGTAAAAACGTTTTTGAATTCTGCTAG
Ro06-6703562	Ro06	6703562	T	A	TTGGGTCTRTTGTGCCCTTGGTATGATGAGATTTTATTMTTCAAGGATTACAATTTGGAATCYCGGAGGAATTCATTCCTGTAAAGCAGTTCAARGCGAT[T/A]TAATACACATGTCTCAAGATCATGACAATAGTTCCTTTTCTGTTGTTGGTAATTATCTTGTGGATGCTGTAAAAACGTTTTTGAATTCTGCTAGAAGTTA
Ro06-6710840	Ro06	6710840	T	G	ATTCTAAAATTATCGCTACGTTTTTTACTAGGTCGATCTGGTTATACAAATATCGATCATATTGAGGCCAATATGCACCTCCGTACGTACCACTAATTTT[T/G]TTGTTTGTTTTGTCAATAAGTTCCAATTAGAAGCTCAACATCTTCACTGATTCCAGTAGGATGTGTACGTCCTTTTTCTCAAAGTACAAATTCTGGTAAG
Ro06-6725832	Ro06	6725832	A	G	AATGGATAATGTCTTGTGATTATACTTTCTACTTGATTTCTGTGTTTTGTTTCTTTTTACTCATTTTCTTTTTACTTGCTTCCATAGAACTTTTCATGGC[A/G]TCCTACATGTATCATATATGTTGAACCTGTAGTTTAGGACAGTTTCTATGCTGCATTGTTGCCTATAGGAGGGAAAGTCATACTGTATTTTATAAAGTAA
Ro06-6735882	Ro06	6735882	G	A	AAGATCAAGGAGCACAAGGAGAGGGCTTGCAACCACTTGGTGACAGCAAGGACCAGCTGGCCTCCCTTCTTGAGCATCTCTTCACCTTTGAGAACATGAT[G/A]TTATCTAYGATGTATWATGAGTAATCCTCCAAGATTGGGGGCTAGGGTTGTGTGCCCTAGCCCAATGAAGATGGTTTGATTGATTAATAAATTTGTGCTT
Ro06-6735890	Ro06	6735890	C	T	GGAGCACAAGGAGAGGGCTTGCAACCACTTGGTGACAGCAAGGACCAGCTGGCCTCCCTTCTTGAGCATCTCTTCACCTTTGAGAACATGATRTTATCTA[C/T]GATGTATWATGAGTAATCCTCCAAGATTGGGGGCTAGGGTTGTGTGCCCTAGCCCAATGAAGATGGTTTGATTGATTAATAAATTTGTGCTTGTGATTTT
Ro06-6735898	Ro06	6735898	T	A	AGGAGAGGGCTTGCAACCACTTGGTGACAGCAAGGACCAGCTGGCCTCCCTTCTTGAGCATCTCTTCACCTTTGAGAACATGATRTTATCTAYGATGTAT[T/A]ATGAGTAATCCTCCAAGATTGGGGGCTAGGGTTGTGTGCCCTAGCCCAATGAAGATGGTTTGATTGATTAATAAATTTGTGCTTGTGATTTTGATATTGA
Ro06-6736557	Ro06	6736557	A	G	GTGGGTTATGTAATGTGTTCTAAATTTCTCATTATATTTCTAAAATCTCTTTATCTTTTTCAAGTGAAGCATGTTTATTTGTGAAATATATTATGAAACT[A/G]GTGATTGAGTTTATTCWTGAAACATGAGAACTTCTTGATTGGTTATGYCGAGGTAAGGATGTGACACACGGAGCTATAGGACGAGAATGTCATTAGGTGG
Ro06-6736574	Ro06	6736574	A	T	TTCTAAATTTCTCATTATATTTCTAAAATCTCTTTATCTTTTTCAAGTGAAGCATGTTTATTTGTGAAATATATTATGAAACTRGTGATTGAGTTTATTC[A/T]TGAAACATGAGAACTTCTTGATTGGTTATGYCGAGGTAAGGATGTGACACACGGAGCTATAGGACGAGAATGTCATTAGGTGGMTGTGAGGATCACTAAA
Ro06-6736605	Ro06	6736605	C	T	CTTTATCTTTTTCAAGTGAAGCATGTTTATTTGTGAAATATATTATGAAACTRGTGATTGAGTTTATTCWTGAAACATGAGAACTTCTTGATTGGTTATG[C/T]CGAGGTAAGGATGTGACACACGGAGCTATAGGACGAGAATGTCATTAGGTGGMTGTGAGGATCACTAAATTGAAGGATAATCATGATATGAAGGGACGAT
Ro06-6736658	Ro06	6736658	C	A	GTGATTGAGTTTATTCWTGAAACATGAGAACTTCTTGATTGGTTATGYCGAGGTAAGGATGTGACACACGGAGCTATAGGACGAGAATGTCATTAGGTGG[C/A]TGTGAGGATCACTAAATTGAAGGATAATCATGATATGAAGGGACGATGTGATGTGATATGAGGAATTGAGTTATTATTATGTGTGTAAAACAACATAGTT
Ro06-6743696	Ro06	6743696	C	T	GGATTTTGAGGGTTCGATCACGGAAGGGTCAGGCAGTGAGAAGAGACTAGAGAGTAGTGAGTGTGTGTTGTACAGCAGGACTCTTTTTCTGTGTGGGACT[C/T]GAATTTATAGAGAGAGGAAATKAATGTACAGGTAGRACATGAAGAGCTAAAATTTAGTAAAATTACATTACAACAAAATACATGTAATCAAACATTTAGG
Ro06-6743718	Ro06	6743718	G	T	GAAGGGTCAGGCAGTGAGAAGAGACTAGAGAGTAGTGAGTGTGTGTTGTACAGCAGGACTCTTTTTCTGTGTGGGACTYGAATTTATAGAGAGAGGAAAT[G/T]AATGTACAGGTAGRACATGAAGAGCTAAAATTTAGTAAAATTACATTACAACAAAATACATGTAATCAAACATTTAGGGGAAAAAAAAAACATTTAGAAA
Ro06-6743732	Ro06	6743732	A	G	TGAGAAGAGACTAGAGAGTAGTGAGTGTGTGTTGTACAGCAGGACTCTTTTTCTGTGTGGGACTYGAATTTATAGAGAGAGGAAATKAATGTACAGGTAG[A/G]ACATGAAGAGCTAAAATTTAGTAAAATTACATTACAACAAAATACATGTAATCAAACATTTAGGGGAAAAAAAAAACATTTAGAAAACAATAATKTGGAT
Ro06-6743827	Ro06	6743827	G	T	GGTAGRACATGAAGAGCTAAAATTTAGTAAAATTACATTACAACAAAATACATGTAATCAAACATTTAGGGGAAAAAAAAAACATTTAGAAAACAATAAT[G/T]TGGATTTTCTTTTTGGACAATAAYAATTTTGAATATTTTTTACCCAAAAAATGTGGATTTTAAGGATTTTAGACATATATAACGTGGACYGGTGGACGRA
Ro06-6743851	Ro06	6743851	T	C	TAGTAAAATTACATTACAACAAAATACATGTAATCAAACATTTAGGGGAAAAAAAAAACATTTAGAAAACAATAATKTGGATTTTCTTTTTGGACAATAA[T/C]AATTTTGAATATTTTTTACCCAAAAAATGTGGATTTTAAGGATTTTAGACATATATAACGTGGACYGGTGGACGRATGCAACCAAGATACACAACCAATA
Ro06-6743917	Ro06	6743917	C	T	AAACAATAATKTGGATTTTCTTTTTGGACAATAAYAATTTTGAATATTTTTTACCCAAAAAATGTGGATTTTAAGGATTTTAGACATATATAACGTGGAC[C/T]GGTGGACGRATGCAACCAAGATACACAACCAATAACCAAATTGGAAGAAAAACAATAATCAATGCTATTAAACCAATAATCAATGCTATCTTGTATTAAT
Ro06-6743926	Ro06	6743926	A	G	TKTGGATTTTCTTTTTGGACAATAAYAATTTTGAATATTTTTTACCCAAAAAATGTGGATTTTAAGGATTTTAGACATATATAACGTGGACYGGTGGACG[A/G]ATGCAACCAAGATACACAACCAATAACCAAATTGGAAGAAAAACAATAATCAATGCTATTAAACCAATAATCAATGCTATCTTGTATTAATTTTGATGGA
Ro06-6794223	Ro06	6794223	T	A	CCTCAAAGACTTCTCTAAGATTCCGTTATGTGATCTTCTTGCCAAGGATGCTCCATGAAATTTCACCAAAGAGTGCTTGAAGGGCTTTGAGGAGATAAAT[T/A]AGTTGTTAACAAGTGCTCCTATCATTTGTGCACCCGATTGGAGCTTACCCTTTGAATTGATGTGTGATGCTTCCGACTATGCAATGGAGGCGGTTCTAGG
Ro06-6813662	Ro06	6813662	G	A	TGGGATGATACGGGTAGTGAGCTCGCAGGTGAATTATATGTGCTAGGAGTTTAGCATAAACAGCATAAGAGATGACTATAACGTGACATGTGACCAGCAT[G/A]TCTACGCATCAACCAACACCAYAATCCTTATATGGYCCGCTTGGTGGTTGAATAGGTCTRCAGATATCCCCCATGGATTATCTRTAAGAATGGGAKAAGT
Ro06-6813684	Ro06	6813684	T	C	TCGCAGGTGAATTATATGTGCTAGGAGTTTAGCATAAACAGCATAAGAGATGACTATAACGTGACATGTGACCAGCATRTCTACGCATCAACCAACACCA[T/C]AATCCTTATATGGYCCGCTTGGTGGTTGAATAGGTCTRCAGATATCCCCCATGGATTATCTRTAAGAATGGGAKAAGTACTTTTAGAATCCTTTGCATAG
Ro06-6813698	Ro06	6813698	C	T	TATGTGCTAGGAGTTTAGCATAAACAGCATAAGAGATGACTATAACGTGACATGTGACCAGCATRTCTACGCATCAACCAACACCAYAATCCTTATATGG[C/T]CCGCTTGGTGGTTGAATAGGTCTRCAGATATCCCCCATGGATTATCTRTAAGAATGGGAKAAGTACTTTTAGAATCCTTTGCATAGGACGGTMTTAGTCC
Ro06-6813722	Ro06	6813722	A	G	CAGCATAAGAGATGACTATAACGTGACATGTGACCAGCATRTCTACGCATCAACCAACACCAYAATCCTTATATGGYCCGCTTGGTGGTTGAATAGGTCT[A/G]CAGATATCCCCCATGGATTATCTRTAAGAATGGGAKAAGTACTTTTAGAATCCTTTGCATAGGACGGTMTTAGTCCTAGGTTCCCTAAGGAACATGGMTT
Ro06-6813746	Ro06	6813746	G	A	GACATGTGACCAGCATRTCTACGCATCAACCAACACCAYAATCCTTATATGGYCCGCTTGGTGGTTGAATAGGTCTRCAGATATCCCCCATGGATTATCT[G/A]TAAGAATGGGAKAAGTACTTTTAGAATCCTTTGCATAGGACGGTMTTAGTCCTAGGTTCCCTAAGGAACATGGMTTTGCAAAACGAGCGTTTGGCCTTAG
Ro06-6813758	Ro06	6813758	G	T	GCATRTCTACGCATCAACCAACACCAYAATCCTTATATGGYCCGCTTGGTGGTTGAATAGGTCTRCAGATATCCCCCATGGATTATCTRTAAGAATGGGA[G/T]AAGTACTTTTAGAATCCTTTGCATAGGACGGTMTTAGTCCTAGGTTCCCTAAGGAACATGGMTTTGCAAAACGAGCGTTTGGCCTTAGAGGCATCAGAAG
Ro06-6813791	Ro06	6813791	C	A	TATATGGYCCGCTTGGTGGTTGAATAGGTCTRCAGATATCCCCCATGGATTATCTRTAAGAATGGGAKAAGTACTTTTAGAATCCTTTGCATAGGACGGT[C/A]TTAGTCCTAGGTTCCCTAAGGAACATGGMTTTGCAAAACGAGCGTTTGGCCTTAGAGGCATCAGAAGCATAGGAGGAATGAACCACATTCGAGAAAATAT
Ro06-6813820	Ro06	6813820	C	A	CTRCAGATATCCCCCATGGATTATCTRTAAGAATGGGAKAAGTACTTTTAGAATCCTTTGCATAGGACGGTMTTAGTCCTAGGTTCCCTAAGGAACATGG[C/A]TTTGCAAAACGAGCGTTTGGCCTTAGAGGCATCAGAAGCATAGGAGGAATGAACCACATTCGAGAAAATATTGAGGTCAGATGGGGGCGTCCAGACGGAA
Ro06-6837849	Ro06	6837849	G	A	CTCTCATGTCTAATCGATTCATAAGGGGCTCTCAATCAATTTGCTTAACCTTTTTACAGTTCTTAAATTCATCAAAAGAGGCATAGAATCTAGAAACTGG[G/A]ATTTCAAACAAGTTAAGCCTAAGCSTAACTCATCAYATGCATTGCCAATAGTCTAGAATTTAGAGAGGTAATCAAGCTCACAAATTCAACCAATATAAGT
Ro06-6837874	Ro06	6837874	C	G	GGGCTCTCAATCAATTTGCTTAACCTTTTTACAGTTCTTAAATTCATCAAAAGAGGCATAGAATCTAGAAACTGGRATTTCAAACAAGTTAAGCCTAAGC[C/G]TAACTCATCAYATGCATTGCCAATAGTCTAGAATTTAGAGAGGTAATCAAGCTCACAAATTCAACCAATATAAGTTTAACACATGCTCTTCAATTGATTA
Ro06-6837885	Ro06	6837885	C	T	CAATTTGCTTAACCTTTTTACAGTTCTTAAATTCATCAAAAGAGGCATAGAATCTAGAAACTGGRATTTCAAACAAGTTAAGCCTAAGCSTAACTCATCA[C/T]ATGCATTGCCAATAGTCTAGAATTTAGAGAGGTAATCAAGCTCACAAATTCAACCAATATAAGTTTAACACATGCTCTTCAATTGATTAGGTATCCAAAC
Ro06-6855783	Ro06	6855783	G	A	CCAACAGCATATGATACTTTAATGAGACAAATGATATGTGGGAGGCAAATGACATGTCGATTGGCTACATGAATCTCGTAACCGAGTGCAAATGATATGA[G/A]ATTCTCGTTTCTAATTCCTTCTACACATTTTCTTTGAGCAATTAACTTTTCCTTTAGAAACCGAGATCTACTGCACAGGCAACATCACCATACAGCAGAC
Ro06-6856572	Ro06	6856572	G	T	CGCAACATTTTTAGTTTCCTTCGCCAGCTAAGCTTTTTCTTCTGGCCACTTAAATGAATCAAATAGTACAAGGATCCCATCTCCATGTATTCTGTAACCA[G/T]YGACAAGCGTGRAGGCTTTGTGCATGCACCCAGAAATAAAATGACTGCAGACAACAGCATGGTTAATCTCACATCAGTATAAAACAAAGGAAGTTAATAT
Ro06-6856573	Ro06	6856573	C	T	GCAACATTTTTAGTTTCCTTCGCCAGCTAAGCTTTTTCTTCTGGCCACTTAAATGAATCAAATAGTACAAGGATCCCATCTCCATGTATTCTGTAACCAK[C/T]GACAAGCGTGRAGGCTTTGTGCATGCACCCAGAAATAAAATGACTGCAGACAACAGCATGGTTAATCTCACATCAGTATAAAACAAAGGAAGTTAATATC
Ro06-6856584	Ro06	6856584	G	A	AGTTTCCTTCGCCAGCTAAGCTTTTTCTTCTGGCCACTTAAATGAATCAAATAGTACAAGGATCCCATCTCCATGTATTCTGTAACCAKYGACAAGCGTG[G/A]AGGCTTTGTGCATGCACCCAGAAATAAAATGACTGCAGACAACAGCATGGTTAATCTCACATCAGTATAAAACAAAGGAAGTTAATATCAGAATATACGA
Ro06-6864755	Ro06	6864755	C	T	ACATTCAGCAGCAGAACCTGTGAAACCAGCTTCAGCTCATTAATCTATTATCAAACTAGCTTGTAAACATGTCATCTTCCTCTCATCCATTAGTATGACA[C/T]TTCTTGAATAGAGAACGATTTTCACGACAATAGAACTGTATAGCAAAGTTAATCCTATCATCCACTCCTAAACTGAAGGATGTATAGATGYAGTTCTCCA
Ro06-6864846	Ro06	6864846	C	T	AGTATGACAYTTCTTGAATAGAGAACGATTTTCACGACAATAGAACTGTATAGCAAAGTTAATCCTATCATCCACTCCTAAACTGAAGGATGTATAGATG[C/T]AGTTCTCCATTTTCAGGTTCTAAAAGTTATTTAAGATACAAACTATGCTACATAATTTGGTCACTATAATCAGCATGGAGAGATGTAGAAACAGAAATAT
Ro06-6885767	Ro06	6885767	A	T	AGCCAAAGGTGCAGAAATATAGAGTAGTCCCCCATACATTAGGCCAAAAAGTGAACTTAAAGCTTCCCTGAGGTTGGAGTATTTGGAGACCAAGATCATC[A/T]TCTTTGGATTTGCAATGAAGAGCGAGGTCCATGCTCATATCATTTTTGACCGTAACATGTATGCGTTTGCTTTTGATACTGCCCATGCTTCCCGGCAACA
Ro06-6897270	Ro06	6897270	C	T	TTGCTTTCCTGGGTTTTCAGATGAGTGGAAATGTTAACAGGCACATTGGTCACAATTATTGAGCCTAGTGAAAGAGTGGGTCTCAAACACTATTTGATGC[C/T]AACTCTATTTTTGTTATTGGGTCGATAGGAAAAATATCAGGATGCCACTTCCTCATGAGTTCAGGGATTTTTGTTCTTAAACATAAGGTAGTAGCTTGGG
Ro06-6897381	Ro06	6897381	A	C	TTGTTATTGGGTCGATAGGAAAAATATCAGGATGCCACTTCCTCATGAGTTCAGGGATTTTTGTTCTTAAACATAAGGTAGTAGCTTGGGAGGCCAAAAC[A/C]AAAGAACAAATTCACAACTTGCATGTCATGAAATAGATACTGTTATGTATAATACATAAATAAAAGCATAAACTGCACGTCATGAAAAACACAGTGGATT
Ro06-6909410	Ro06	6909410	T	C	TAAGGAGATATTATTTTATGGTTTCAATTATGAGATTCGTAATGTCGTTGATATGCTCGGCAATTTTCGGAATTGAGGTAGGGATTCTCGGGGAGCCTTT[T/C]CATAAAATGTTAATTAGGTTAATTATTRRTTTATATGAATTGTATGGTATTGGTTGAATGACATATTTGTATATTATTGTTTTCTATAAAAGCATGTGTA
Ro06-6909438	Ro06	6909438	G	A	TATGAGATTCGTAATGTCGTTGATATGCTCGGCAATTTTCGGAATTGAGGTAGGGATTCTCGGGGAGCCTTTYCATAAAATGTTAATTAGGTTAATTATT[G/A]RTTTATATGAATTGTATGGTATTGGTTGAATGACATATTTGTATATTATTGTTTTCTATAAAAGCATGTGTACATAAGATGTTATTTTATAAGCAATAAA
Ro06-6909439	Ro06	6909439	G	A	ATGAGATTCGTAATGTCGTTGATATGCTCGGCAATTTTCGGAATTGAGGTAGGGATTCTCGGGGAGCCTTTYCATAAAATGTTAATTAGGTTAATTATTR[G/A]TTTATATGAATTGTATGGTATTGGTTGAATGACATATTTGTATATTATTGTTTTCTATAAAAGCATGTGTACATAAGATGTTATTTTATAAGCAATAAAC
Ro06-6916505	Ro06	6916505	G	A	GATTATGACTAGCCTATTGCCATTTGGATCTTTACTATGCACTTTTGTGCTTTGGTTTTATTGTGGGTGTTGATGATTTGAATGGTGTTTTTGGACTTGA[G/A]TTGTGCATTGTGTRCTTGGACTATCTTGTTGATGATATAGGTACCATTTGATTCCTCCCTAACCACCGGGTTAGTGGAGCGGTTTACATTGCTTGGYTTG
Ro06-6916519	Ro06	6916519	G	A	TATTGCCATTTGGATCTTTACTATGCACTTTTGTGCTTTGGTTTTATTGTGGGTGTTGATGATTTGAATGGTGTTTTTGGACTTGARTTGTGCATTGTGT[G/A]CTTGGACTATCTTGTTGATGATATAGGTACCATTTGATTCCTCCCTAACCACCGGGTTAGTGGAGCGGTTTACATTGCTTGGYTTGAGGACATGTTTCAA
Ro06-6916602	Ro06	6916602	T	C	TGARTTGTGCATTGTGTRCTTGGACTATCTTGTTGATGATATAGGTACCATTTGATTCCTCCCTAACCACCGGGTTAGTGGAGCGGTTTACATTGCTTGG[T/C]TTGAGGACATGTTTCAAGAGGAGCTCCCATGAGCCAAACTTGTTCATAATTTCCTTTCTATTTGGAAATTACCACAAAGGGGCTTCTCTTTCACTTTCTT
Ro06-6919814	Ro06	6919814	G	A	ATATATTTATGCTTGAGATTTTGATATGGATATGTTCATTGTCCACTTTTGTTATGTGTTAGATGCATGTCTAGGAACTTTATCACTTCTAAAAGCATGT[G/A]TTTAATCTATTTTGGTAGAGATTGTGAGCTTGATAATCTTATACTCTCTAGACAATTGACAATGGATGTGATGAACTTGTCTTATTTGAATCCCTAGGTC
Ro06-6922085	Ro06	6922085	C	T	CTGGGGACCCGATTCCACTGGCTGTTCCTTTGTCGTAATCTTCGACATTGAAATCTTCTAGATCTGAGTCCGGGTAGATCTGATAAGGGTTATCTTTTGC[C/T]AGATTCTGTAGACAGGTGTATGTGGCTTTTGTACAATCCACCTCATCTCTCATTATTGAAGAAAAACAGTCACATGCAGTTGGTGGAGGATGATCATAGC
Ro06-6930392	Ro06	6930392	A	T	CAAAACAAAACATGAATGAAAACAAACAAAACTAGAAAAACTCCCCTTCGAAGTGCATGCTTTCCGTTTAGACACGAACAATCACCAACAACAAGGTTTC[A/T]AGACCTTGYAATCCAWWGCTCACGACCTKTGGTGATGCTTATCATGATGTACTTCAACAWWTTGGGGTATGGGGMTGCCTCCCCATGAGCGCTTATTTTT
Ro06-6930401	Ro06	6930401	C	T	ACATGAATGAAAACAAACAAAACTAGAAAAACTCCCCTTCGAAGTGCATGCTTTCCGTTTAGACACGAACAATCACCAACAACAAGGTTTCWAGACCTTG[C/T]AATCCAWWGCTCACGACCTKTGGTGATGCTTATCATGATGTACTTCAACAWWTTGGGGTATGGGGMTGCCTCCCCATGAGCGCTTATTTTTAGAGACCCT
Ro06-6930408	Ro06	6930408	A	T	TGAAAACAAACAAAACTAGAAAAACTCCCCTTCGAAGTGCATGCTTTCCGTTTAGACACGAACAATCACCAACAACAAGGTTTCWAGACCTTGYAATCCA[A/T]WGCTCACGACCTKTGGTGATGCTTATCATGATGTACTTCAACAWWTTGGGGTATGGGGMTGCCTCCCCATGAGCGCTTATTTTTAGAGACCCTCAAACCG
Ro06-6930409	Ro06	6930409	T	A	GAAAACAAACAAAACTAGAAAAACTCCCCTTCGAAGTGCATGCTTTCCGTTTAGACACGAACAATCACCAACAACAAGGTTTCWAGACCTTGYAATCCAW[T/A]GCTCACGACCTKTGGTGATGCTTATCATGATGTACTTCAACAWWTTGGGGTATGGGGMTGCCTCCCCATGAGCGCTTATTTTTAGAGACCCTCAAACCGG
Ro06-6930421	Ro06	6930421	T	G	AACTAGAAAAACTCCCCTTCGAAGTGCATGCTTTCCGTTTAGACACGAACAATCACCAACAACAAGGTTTCWAGACCTTGYAATCCAWWGCTCACGACCT[T/G]TGGTGATGCTTATCATGATGTACTTCAACAWWTTGGGGTATGGGGMTGCCTCCCCATGAGCGCTTATTTTTAGAGACCCTCAAACCGGTCTTTCTTCCTT
Ro06-6930452	Ro06	6930452	A	T	TTTCCGTTTAGACACGAACAATCACCAACAACAAGGTTTCWAGACCTTGYAATCCAWWGCTCACGACCTKTGGTGATGCTTATCATGATGTACTTCAACA[A/T]WTTGGGGTATGGGGMTGCCTCCCCATGAGCGCTTATTTTTAGAGACCCTCAAACCGGTCTTTCTTCCTTCTTCATTCTTCATGGAGGCTCATAGCTCTCC
Ro06-6930453	Ro06	6930453	A	T	TTCCGTTTAGACACGAACAATCACCAACAACAAGGTTTCWAGACCTTGYAATCCAWWGCTCACGACCTKTGGTGATGCTTATCATGATGTACTTCAACAW[A/T]TTGGGGTATGGGGMTGCCTCCCCATGAGCGCTTATTTTTAGAGACCCTCAAACCGGTCTTTCTTCCTTCTTCATTCTTCATGGAGGCTCATAGCTCTCCT
Ro06-6930467	Ro06	6930467	C	A	GAACAATCACCAACAACAAGGTTTCWAGACCTTGYAATCCAWWGCTCACGACCTKTGGTGATGCTTATCATGATGTACTTCAACAWWTTGGGGTATGGGG[C/A]TGCCTCCCCATGAGCGCTTATTTTTAGAGACCCTCAAACCGGTCTTTCTTCCTTCTTCATTCTTCATGGAGGCTCATAGCTCTCCTTCTTACCACCCACC
Ro06-6936952	Ro06	6936952	A	C	TCTGGGACTACACCGAAGTTGAAGTTTAATGATGTGCATGACACTCTTCTAAACGAGGAGACGCGGAGAAAGAACAATAACCTTGAAGATCCTTCAAGTT[A/C]TGCACYCTCTACAGAAAATAGAGGTAGAACATTCAACAAGAATTCAAATACTAATCGTGGAAGGTCCAAATCTAGGGYACCGGGTAAAGGTAKAAGCATG
Ro06-6936958	Ro06	6936958	C	T	ACTACACCGAAGTTGAAGTTTAATGATGTGCATGACACTCTTCTAAACGAGGAGACGCGGAGAAAGAACAATAACCTTGAAGATCCTTCAAGTTMTGCAC[C/T]CTCTACAGAAAATAGAGGTAGAACATTCAACAAGAATTCAAATACTAATCGTGGAAGGTCCAAATCTAGGGYACCGGGTAAAGGTAKAAGCATGTCCAAA
Ro06-6937030	Ro06	6937030	T	C	AACCTTGAAGATCCTTCAAGTTMTGCACYCTCTACAGAAAATAGAGGTAGAACATTCAACAAGAATTCAAATACTAATCGTGGAAGGTCCAAATCTAGGG[T/C]ACCGGGTAAAGGTAKAAGCATGTCCAAATCAGGCAAGTGGTCCAATGGGTGTTGGCATTGTGGAATGTCTGGACATTTAAAGAAAGATTGCAAACAGTGG
Ro06-6937045	Ro06	6937045	G	T	TCAAGTTMTGCACYCTCTACAGAAAATAGAGGTAGAACATTCAACAAGAATTCAAATACTAATCGTGGAAGGTCCAAATCTAGGGYACCGGGTAAAGGTA[G/T]AAGCATGTCCAAATCAGGCAAGTGGTCCAATGGGTGTTGGCATTGTGGAATGTCTGGACATTTAAAGAAAGATTGCAAACAGTGGAAGGATGCAATGCAA
Ro06-6938178	Ro06	6938178	A	G	GAACGCATGAATAGGACTGTGAATGAGCGCACAAGGAGCATGAGGATACACGCTGGATTGCCAAAAACGTTTTGGGCTGATGTGATTAATACTGCTGCTT[A/G]CTTAATTAATCGTGGACCGTCAGTACCATTGAAYCAAYKCCTACCTGAGGAAGAATGGAGTGAAAAAGAGATAGGCCTATCACACTTRAARGTGTTTGGT
Ro06-6938212	Ro06	6938212	T	C	GGAGCATGAGGATACACGCTGGATTGCCAAAAACGTTTTGGGCTGATGTGATTAATACTGCTGCTTRCTTAATTAATCGTGGACCGTCAGTACCATTGAA[T/C]CAAYKCCTACCTGAGGAAGAATGGAGTGAAAAAGAGATAGGCCTATCACACTTRAARGTGTTTGGTTGCGTGGCATATGTTCACATTGAGTCCGATGCAA
Ro06-6938216	Ro06	6938216	C	T	CATGAGGATACACGCTGGATTGCCAAAAACGTTTTGGGCTGATGTGATTAATACTGCTGCTTRCTTAATTAATCGTGGACCGTCAGTACCATTGAAYCAA[C/T]KCCTACCTGAGGAAGAATGGAGTGAAAAAGAGATAGGCCTATCACACTTRAARGTGTTTGGTTGCGTGGCATATGTTCACATTGAGTCCGATGCAAGAAA
Ro06-6938217	Ro06	6938217	T	G	ATGAGGATACACGCTGGATTGCCAAAAACGTTTTGGGCTGATGTGATTAATACTGCTGCTTRCTTAATTAATCGTGGACCGTCAGTACCATTGAAYCAAY[T/G]CCTACCTGAGGAAGAATGGAGTGAAAAAGAGATAGGCCTATCACACTTRAARGTGTTTGGTTGCGTGGCATATGTTCACATTGAGTCCGATGCAAGAAAC
Ro06-6938266	Ro06	6938266	G	A	ATACTGCTGCTTRCTTAATTAATCGTGGACCGTCAGTACCATTGAAYCAAYKCCTACCTGAGGAAGAATGGAGTGAAAAAGAGATAGGCCTATCACACTT[G/A]AARGTGTTTGGTTGCGTGGCATATGTTCACATTGAGTCCGATGCAAGAAACAAGTTAGATCCCAAGTCTCGGAAGTGCATATTCATAGGCTATGGCAGTG
Ro06-6938269	Ro06	6938269	A	G	CTGCTGCTTRCTTAATTAATCGTGGACCGTCAGTACCATTGAAYCAAYKCCTACCTGAGGAAGAATGGAGTGAAAAAGAGATAGGCCTATCACACTTRAA[A/G]GTGTTTGGTTGCGTGGCATATGTTCACATTGAGTCCGATGCAAGAAACAAGTTAGATCCCAAGTCTCGGAAGTGCATATTCATAGGCTATGGCAGTGATG
Ro06-6954410	Ro06	6954410	G	A	AGGATCCATTCTGCATGTCATGAATTAGGCATCCGGAGGGACGTTTTCGGCATATTGATCTCACTGAAGGCTTTGGATTTGAGCGTAGTTCATCCACGGA[G/A]ACATCAACAACGACCCAACTTCCATCTAGTTGTTGGTGAGAGTATCTAACAAACTGGACTTCACGAGTTGAAACGGTGTGAGATGCCACCAGAAACTCGG
Ro06-6968120	Ro06	6968120	T	C	GGAGAGGACGAAGCAGAGGCCGAAGCCTGGGCTGGAAACGATCAATGGCTCAGATCTTGGCAATGAACCATCAGTCCTCCCAACGGTTGAGATTGGCCCA[T/C]GTATGTAAAGCATAAGGAGAGTGCATCTCACGCGCCCAAAAAAAAAATGGGGACATGTCCACCTGGGGGYACACCAAAATCTTCCCKCATCTTTGACTAT
Ro06-6968190	Ro06	6968190	C	T	TCAGTCCTCCCAACGGTTGAGATTGGCCCAYGTATGTAAAGCATAAGGAGAGTGCATCTCACGCGCCCAAAAAAAAAATGGGGACATGTCCACCTGGGGG[C/T]ACACCAAAATCTTCCCKCATCTTTGACTATCCCCACATTTCTCAAATTTGGCGCCTCCTCCCCCTCCCGTGGGYCAAAAGTCTCCTTGTAACCAAATAGA
Ro06-6968207	Ro06	6968207	T	G	TGAGATTGGCCCAYGTATGTAAAGCATAAGGAGAGTGCATCTCACGCGCCCAAAAAAAAAATGGGGACATGTCCACCTGGGGGYACACCAAAATCTTCCC[T/G]CATCTTTGACTATCCCCACATTTCTCAAATTTGGCGCCTCCTCCCCCTCCCGTGGGYCAAAAGTCTCCTTGTAACCAAATAGAATAGCCAACCAAACATT
Ro06-6968264	Ro06	6968264	C	T	AAAATGGGGACATGTCCACCTGGGGGYACACCAAAATCTTCCCKCATCTTTGACTATCCCCACATTTCTCAAATTTGGCGCCTCCTCCCCCTCCCGTGGG[C/T]CAAAAGTCTCCTTGTAACCAAATAGAATAGCCAACCAAACATTTGAAATCATGCTAGATCACAAGGAGTTGACCTATACAAATATAAAGTTCAAAATACA
Ro06-7001663	Ro06	7001663	C	T	CAAATAATTTGTCAGCTGCAATCTTCCCCAATTCTGGCTTCCTATACATTTTACAAGCCCCAAGAAGGGCCCCCCAAATGGAAATTGTTGGACGAATTGG[C/T]ATCTTTGTAATAAACTCATAAGCACGMTCTACCATCCCAGCTCGCCCTAGCAAGTCCACAACACATGCATAATGCTCTGCTCCGGGTTCAACACCATACC
Ro06-7001690	Ro06	7001690	A	C	CCAATTCTGGCTTCCTATACATTTTACAAGCCCCAAGAAGGGCCCCCCAAATGGAAATTGTTGGACGAATTGGYATCTTTGTAATAAACTCATAAGCACG[A/C]TCTACCATCCCAGCTCGCCCTAGCAAGTCCACAACACATGCATAATGCTCTGCTCCGGGTTCAACACCATACCTAGCTTTCATTGAATCAAAGATCTGCA
Ro06-7001807	Ro06	7001807	C	T	GCCCTAGCAAGTCCACAACACATGCATAATGCTCTGCTCCGGGTTCAACACCATACCTAGCTTTCATTGAATCAAAGATCTGCATGCCCTTTTGCACAGC[C/T]CCCTCCCTACTACAAGCCGATAATACACACACCAATGTGACATAATTTGGTTTAACCTCATGGCTTCTGGCACTCATTTCCTCAAACAATGCCAAAGCCA
Ro06-7005369	Ro06	7005369	T	C	TTCAAACAGAAATAACTCTAAAAAATTCCAACTAGTAATGGCACATAATTGTCACAGTAGAAAATTGAGCAACAGAAGTCAAACACATTTTAAACATGCT[T/C]GAATTGATATGTCAGGAAATAAAGGAGCATTCTTCATACCTAGTTTAGCATRAACTTTTTYGAGGGCTTCTTTTGAAAGAGATCTATTCGGCGAATTGAA
Ro06-7005421	Ro06	7005421	A	G	CACAGTAGAAAATTGAGCAACAGAAGTCAAACACATTTTAAACATGCTYGAATTGATATGTCAGGAAATAAAGGAGCATTCTTCATACCTAGTTTAGCAT[A/G]AACTTTTTYGAGGGCTTCTTTTGAAAGAGATCTATTCGGCGAATTGAAAGAGATGATTTGCACATATTATAGTCTTTGAATTCTAAGCATTAAAGGGAAT
Ro06-7005430	Ro06	7005430	T	C	AAATTGAGCAACAGAAGTCAAACACATTTTAAACATGCTYGAATTGATATGTCAGGAAATAAAGGAGCATTCTTCATACCTAGTTTAGCATRAACTTTTT[T/C]GAGGGCTTCTTTTGAAAGAGATCTATTCGGCGAATTGAAAGAGATGATTTGCACATATTATAGTCTTTGAATTCTAAGCATTAAAGGGAATATTACATAT
Ro06-7031173	Ro06	7031173	C	T	AACAATAAAGCACGTCCAATACCATTTCATTGATTAGTGGACTTCCAAAAAGGAGTGTTATTGATTTGCACGTAATTTACGTACAAAACATGTTTCTAAC[C/T]ACTTRAATAATGTTTSTCYAAGAGCCAAATAAAATCATTAATATGTGTTTTTATTGTTTTCAGGTTGAATAAGTRAGTTGAAGTAATTTGAGAGCTTTTG
Ro06-7031178	Ro06	7031178	G	A	TAAAGCACGTCCAATACCATTTCATTGATTAGTGGACTTCCAAAAAGGAGTGTTATTGATTTGCACGTAATTTACGTACAAAACATGTTTCTAACYACTT[G/A]AATAATGTTTSTCYAAGAGCCAAATAAAATCATTAATATGTGTTTTTATTGTTTTCAGGTTGAATAAGTRAGTTGAAGTAATTTGAGAGCTTTTGGAGCA
Ro06-7031189	Ro06	7031189	C	G	CAATACCATTTCATTGATTAGTGGACTTCCAAAAAGGAGTGTTATTGATTTGCACGTAATTTACGTACAAAACATGTTTCTAACYACTTRAATAATGTTT[C/G]TCYAAGAGCCAAATAAAATCATTAATATGTGTTTTTATTGTTTTCAGGTTGAATAAGTRAGTTGAAGTAATTTGAGAGCTTTTGGAGCATTTTCGAGAAA
Ro06-7031192	Ro06	7031192	C	T	TACCATTTCATTGATTAGTGGACTTCCAAAAAGGAGTGTTATTGATTTGCACGTAATTTACGTACAAAACATGTTTCTAACYACTTRAATAATGTTTSTC[C/T]AAGAGCCAAATAAAATCATTAATATGTGTTTTTATTGTTTTCAGGTTGAATAAGTRAGTTGAAGTAATTTGAGAGCTTTTGGAGCATTTTCGAGAAAATG
Ro06-7031248	Ro06	7031248	A	G	TTTACGTACAAAACATGTTTCTAACYACTTRAATAATGTTTSTCYAAGAGCCAAATAAAATCATTAATATGTGTTTTTATTGTTTTCAGGTTGAATAAGT[A/G]AGTTGAAGTAATTTGAGAGCTTTTGGAGCATTTTCGAGAAAATGACAAAAGTCAACCGTGACTTTTCGAGCACCAAGATCACAAGAATCAAGCCTTGGAA
Ro06-7035506	Ro06	7035506	G	T	AATTTCCATGATGCAGTGAATCCTGACTGGAGTGCATTGAGCCGCAGCCTTCCAAAGATAGCTAGAAACCCCAACATGCTCAACTATATTATTCAAGCAA[G/T]GCCACATGATCGAGCTTTCGAGACAAGTACTTACAAGATCTCACGTACTACTATATATGCCCTATATTAGCATAGGCTATATACATACATATGTATATAT
Ro06-7070620	Ro06	7070620	G	A	GTTCTTAAGAAATGTTTCTTGAAATGACCAATATGCAAACAATTTCAGCAATTTAGTATCTACATGTTTGTACTTTAGCTTTCCCTTGTCTTCCTCAAGT[G/A]TGGTACTTGCAGTGCAATTTTKTGCACTCAGTACTTGGGGAAAAGTAAGATCAGCCATTTGTTTTCTTTGGAAGGTTTATTGTGTTATCTGTTGATGAAA
Ro06-7070642	Ro06	7070642	T	G	AATGACCAATATGCAAACAATTTCAGCAATTTAGTATCTACATGTTTGTACTTTAGCTTTCCCTTGTCTTCCTCAAGTRTGGTACTTGCAGTGCAATTTT[T/G]TGCACTCAGTACTTGGGGAAAAGTAAGATCAGCCATTTGTTTTCTTTGGAAGGTTTATTGTGTTATCTGTTGATGAAAAGTTGAAAAATAAAATCGATCT
Ro06-7091521	Ro06	7091521	G	A	AGCACATTGAAGGTTCTGTTCTTTACCTAGATGCTGGATCTACAGAGAGTTTCCAGTTCATTGGAGCATTTCCTCTGTTACTGAACCATGGAGTACGTGC[G/A]ATTTGCAGTTTGGAAAATATGTGTTCTCTTGATGYGGTAAGTTGGTTTCTTGAGGCCYACATGTCAGTCGTTTCATGCATCTTATAAAATGTGGAAAAAA
Ro06-7091556	Ro06	7091556	T	C	GGATCTACAGAGAGTTTCCAGTTCATTGGAGCATTTCCTCTGTTACTGAACCATGGAGTACGTGCRATTTGCAGTTTGGAAAATATGTGTTCTCTTGATG[T/C]GGTAAGTTGGTTTCTTGAGGCCYACATGTCAGTCGTTTCATGCATCTTATAAAATGTGGAAAAAAACAATCAGATTCTGATGTGGACCTATCATTCTTTT
Ro06-7091579	Ro06	7091579	T	C	CATTGGAGCATTTCCTCTGTTACTGAACCATGGAGTACGTGCRATTTGCAGTTTGGAAAATATGTGTTCTCTTGATGYGGTAAGTTGGTTTCTTGAGGCC[T/C]ACATGTCAGTCGTTTCATGCATCTTATAAAATGTGGAAAAAAACAATCAGATTCTGATGTGGACCTATCATTCTTTTTCAAGCAAGAAGCTTTCTTTTAT
Ro06-7092043	Ro06	7092043	C	T	AGTCAAAATAATACAGCCAAATGATTCGCACCATGGACCCTAACTAAATAGGGCATCAGACTTTGGGCATCTCCAATACCCTATGGATCCAGATCTCTCT[C/T]CTCATMTACTCAAAACAATTTTAAGGAGCTTCACAGCATAACAATACTGTTTATACTGCAAGGGGTTTAAGTGTTGATATTGAGTTTTTTGTTATCCCGT
Ro06-7092049	Ro06	7092049	C	A	AATAATACAGCCAAATGATTCGCACCATGGACCCTAACTAAATAGGGCATCAGACTTTGGGCATCTCCAATACCCTATGGATCCAGATCTCTCTYCTCAT[C/A]TACTCAAAACAATTTTAAGGAGCTTCACAGCATAACAATACTGTTTATACTGCAAGGGGTTTAAGTGTTGATATTGAGTTTTTTGTTATCCCGTCTCAGG
Ro06-7092152	Ro06	7092152	G	A	CTCAAAACAATTTTAAGGAGCTTCACAGCATAACAATACTGTTTATACTGCAAGGGGTTTAAGTGTTGATATTGAGTTTTTTGTTATCCCGTCTCAGGGA[G/A]CCTTTACTTGTTATTTTRCTTGACCAGAGWTAWCTTCTGGTCAAACWTGAGGAACATGTTACCTATGGTCTGTATTCCGTGAAAAAGTGGAGTACCTACT
Ro06-7092170	Ro06	7092170	A	G	AGCTTCACAGCATAACAATACTGTTTATACTGCAAGGGGTTTAAGTGTTGATATTGAGTTTTTTGTTATCCCGTCTCAGGGARCCTTTACTTGTTATTTT[A/G]CTTGACCAGAGWTAWCTTCTGGTCAAACWTGAGGAACATGTTACCTATGGTCTGTATTCCGTGAAAAAGTGGAGTACCTACTATTTCACTCCAAATACTG
Ro06-7092182	Ro06	7092182	A	T	TAACAATACTGTTTATACTGCAAGGGGTTTAAGTGTTGATATTGAGTTTTTTGTTATCCCGTCTCAGGGARCCTTTACTTGTTATTTTRCTTGACCAGAG[A/T]TAWCTTCTGGTCAAACWTGAGGAACATGTTACCTATGGTCTGTATTCCGTGAAAAAGTGGAGTACCTACTATTTCACTCCAAATACTGTGTAGTGCTGTT
Ro06-7092185	Ro06	7092185	A	T	CAATACTGTTTATACTGCAAGGGGTTTAAGTGTTGATATTGAGTTTTTTGTTATCCCGTCTCAGGGARCCTTTACTTGTTATTTTRCTTGACCAGAGWTA[A/T]CTTCTGGTCAAACWTGAGGAACATGTTACCTATGGTCTGTATTCCGTGAAAAAGTGGAGTACCTACTATTTCACTCCAAATACTGTGTAGTGCTGTTGAT
Ro06-7092199	Ro06	7092199	A	T	CTGCAAGGGGTTTAAGTGTTGATATTGAGTTTTTTGTTATCCCGTCTCAGGGARCCTTTACTTGTTATTTTRCTTGACCAGAGWTAWCTTCTGGTCAAAC[A/T]TGAGGAACATGTTACCTATGGTCTGTATTCCGTGAAAAAGTGGAGTACCTACTATTTCACTCCAAATACTGTGTAGTGCTGTTGATTAAACTTTCATTTA
Ro06-7093576	Ro06	7093576	G	A	GGGAATAATATTAGTACATGCAGCAGCCTTAGTAGTTTTGATTCGATTTCTTTTGACATGCTTCTGTCTCTGGTCAATTTGATGAATGTTCAATCACTTC[G/A]GCGCCTAYTGGAGCTACATTAKATTTGTAAATGAACTTGCCTCATATTTCTAATTTTTCTGCCCTTTTGTGTGAAATCCTATTGTTAATGTCACTTGCAC
Ro06-7093584	Ro06	7093584	T	C	TATTAGTACATGCAGCAGCCTTAGTAGTTTTGATTCGATTTCTTTTGACATGCTTCTGTCTCTGGTCAATTTGATGAATGTTCAATCACTTCRGCGCCTA[T/C]TGGAGCTACATTAKATTTGTAAATGAACTTGCCTCATATTTCTAATTTTTCTGCCCTTTTGTGTGAAATCCTATTGTTAATGTCACTTGCACTATGATTG
Ro06-7093598	Ro06	7093598	G	T	GCAGCCTTAGTAGTTTTGATTCGATTTCTTTTGACATGCTTCTGTCTCTGGTCAATTTGATGAATGTTCAATCACTTCRGCGCCTAYTGGAGCTACATTA[G/T]ATTTGTAAATGAACTTGCCTCATATTTCTAATTTTTCTGCCCTTTTGTGTGAAATCCTATTGTTAATGTCACTTGCACTATGATTGTATGAACATATGTA
Ro06-7094351	Ro06	7094351	T	C	TCTCAAAACGCTTAGAAGTTTCTGTTGCCCCCGATAGGATAGTTACTGATCTGACTATCAGACATTCCGGGGGATCATCTTTTGTATTGCCTTTTATATA[T/C]GTCTGTTTCGTCCACATTGAGAATCTMCATAATTCAGCCACTTCACAYGGTAAATTTATTTTTTCTATGACACCGAAAACTACTGCATGCAGAATCTGCA
Ro06-7094378	Ro06	7094378	A	C	CCCCCGATAGGATAGTTACTGATCTGACTATCAGACATTCCGGGGGATCATCTTTTGTATTGCCTTTTATATAYGTCTGTTTCGTCCACATTGAGAATCT[A/C]CATAATTCAGCCACTTCACAYGGTAAATTTATTTTTTCTATGACACCGAAAACTACTGCATGCAGAATCTGCATCTTTGAACTGAAATCTGTTAAAAAGT
Ro06-7094399	Ro06	7094399	T	C	ATCTGACTATCAGACATTCCGGGGGATCATCTTTTGTATTGCCTTTTATATAYGTCTGTTTCGTCCACATTGAGAATCTMCATAATTCAGCCACTTCACA[T/C]GGTAAATTTATTTTTTCTATGACACCGAAAACTACTGCATGCAGAATCTGCATCTTTGAACTGAAATCTGTTAAAAAGTCTAAAAAATTAAACTTTGATG
Ro06-7097173	Ro06	7097173	C	T	GTGATAGGGTGGATAACCTTTTCAAATTCCTTCACAAGTTATCCAGTTTGAAGAGTCGAAACATACCATTGAAGGACGGGGCTTTGGATTCAGAAAATAA[C/T]TTYGGTGGAGATCCATATGCTAGTAGAGGATTACTTTATAAGCTTCTAACACGGGTATTGGGCAAGAATGATGTTACTGGTTTGGAGTATCACTCTTCTA
Ro06-7097176	Ro06	7097176	T	C	ATAGGGTGGATAACCTTTTCAAATTCCTTCACAAGTTATCCAGTTTGAAGAGTCGAAACATACCATTGAAGGACGGGGCTTTGGATTCAGAAAATAAYTT[T/C]GGTGGAGATCCATATGCTAGTAGAGGATTACTTTATAAGCTTCTAACACGGGTATTGGGCAAGAATGATGTTACTGGTTTGGAGTATCACTCTTCTACTG
Ro06-7135500	Ro06	7135500	G	A	GATCGACGAGTACGTACGTACTGATAGAAAGCTAGGCTGCCTATATGTATTGTCAAGAAGACTAATACAGTACGTATGTATATATGTCGATCTCTTTGAC[G/A]GTTCACCTACTGTTGAAAGAGAGGGGTTTATATTATTATTGGAGCTTTCTCCGAGTAAGACTATGGACAATTGGACATGGACGTACATGGACAGGTATGT
Ro06-7135678	Ro06	7135678	A	C	TGGACGTACATGGACAGGTATGTAATTTCTGTCCATATCTGTGTGTTATGTGTGAAAGAAGATGAAGTTGTCCAACTCTAAACTAAGCATGCTGTATGCT[A/C]TGTGACTTGCCACAACCACWTTAATTCCACTACAACGACGGTGATRWTATTAGTTTCTCCAATTTAATTAGTCAACGTATATACGTGCATRATTCCTAAA
Ro06-7135698	Ro06	7135698	T	A	TGTAATTTCTGTCCATATCTGTGTGTTATGTGTGAAAGAAGATGAAGTTGTCCAACTCTAAACTAAGCATGCTGTATGCTMTGTGACTTGCCACAACCAC[T/A]TTAATTCCACTACAACGACGGTGATRWTATTAGTTTCTCCAATTTAATTAGTCAACGTATATACGTGCATRATTCCTAAAATGGGTAAGTAATGATCTTA
Ro06-7135724	Ro06	7135724	A	G	TATGTGTGAAAGAAGATGAAGTTGTCCAACTCTAAACTAAGCATGCTGTATGCTMTGTGACTTGCCACAACCACWTTAATTCCACTACAACGACGGTGAT[A/G]WTATTAGTTTCTCCAATTTAATTAGTCAACGTATATACGTGCATRATTCCTAAAATGGGTAAGTAATGATCTTACTTAACTCATGTGAGATTAGGCTTTA
Ro06-7135725	Ro06	7135725	T	A	ATGTGTGAAAGAAGATGAAGTTGTCCAACTCTAAACTAAGCATGCTGTATGCTMTGTGACTTGCCACAACCACWTTAATTCCACTACAACGACGGTGATR[T/A]TATTAGTTTCTCCAATTTAATTAGTCAACGTATATACGTGCATRATTCCTAAAATGGGTAAGTAATGATCTTACTTAACTCATGTGAGATTAGGCTTTAA
Ro06-7135769	Ro06	7135769	A	G	CTGTATGCTMTGTGACTTGCCACAACCACWTTAATTCCACTACAACGACGGTGATRWTATTAGTTTCTCCAATTTAATTAGTCAACGTATATACGTGCAT[A/G]ATTCCTAAAATGGGTAAGTAATGATCTTACTTAACTCATGTGAGATTAGGCTTTAATTTATCAACCTTTTTCAACAGATTAAGCGTCTATACTTCGAATC
Ro06-7150192	Ro06	7150192	G	A	GGAAGAATGCTCAGCTGCAATCATGATTGCTGATGAAAGAATAATGCATGATATGAAATTTTGAATGCAAGATCTTAGTACTGGTCTGAGTATTAGTCTG[G/A]CAATGCATTAATGGTTCCTTCACATGGTGTCATGGACAATAATAGTARTATYTTGTTYGTAGGCTTCTTGYGCAGTTGATGCGTTGTGATGTGAATCAGT
Ro06-7150240	Ro06	7150240	G	A	TGATATGAAATTTTGAATGCAAGATCTTAGTACTGGTCTGAGTATTAGTCTGRCAATGCATTAATGGTTCCTTCACATGGTGTCATGGACAATAATAGTA[G/A]TATYTTGTTYGTAGGCTTCTTGYGCAGTTGATGCGTTGTGATGTGAATCAGTTACATGTACATTTTCTGTTCATTGATTTTATTTCTCTGTAATCAGGTC
Ro06-7150244	Ro06	7150244	C	T	ATGAAATTTTGAATGCAAGATCTTAGTACTGGTCTGAGTATTAGTCTGRCAATGCATTAATGGTTCCTTCACATGGTGTCATGGACAATAATAGTARTAT[C/T]TTGTTYGTAGGCTTCTTGYGCAGTTGATGCGTTGTGATGTGAATCAGTTACATGTACATTTTCTGTTCATTGATTTTATTTCTCTGTAATCAGGTCAAGG
Ro06-7150250	Ro06	7150250	T	C	TTTTGAATGCAAGATCTTAGTACTGGTCTGAGTATTAGTCTGRCAATGCATTAATGGTTCCTTCACATGGTGTCATGGACAATAATAGTARTATYTTGTT[T/C]GTAGGCTTCTTGYGCAGTTGATGCGTTGTGATGTGAATCAGTTACATGTACATTTTCTGTTCATTGATTTTATTTCTCTGTAATCAGGTCAAGGGCGAAG
Ro06-7150263	Ro06	7150263	C	T	ATCTTAGTACTGGTCTGAGTATTAGTCTGRCAATGCATTAATGGTTCCTTCACATGGTGTCATGGACAATAATAGTARTATYTTGTTYGTAGGCTTCTTG[C/T]GCAGTTGATGCGTTGTGATGTGAATCAGTTACATGTACATTTTCTGTTCATTGATTTTATTTCTCTGTAATCAGGTCAAGGGCGAAGCAAACATTTCCTA
Ro06-7175646	Ro06	7175646	T	C	AGGTGCATTTTCATGGTTTGCCTAGCCTTCTCTTATACAAGTAATTTAGGCTGGTGCATCTAGGTATACATGGAAACATATCCAAGGCATGCAGGTATAT[T/C]TGTGKCATGACAACGGCTACCCCTCGCACGTTCGATTTACATGCCCCGGCCATTGAATTTAGTTCTGCAACATGAAAATTTGTATTCGTATCATTTGAAG
Ro06-7175651	Ro06	7175651	T	G	CATTTTCATGGTTTGCCTAGCCTTCTCTTATACAAGTAATTTAGGCTGGTGCATCTAGGTATACATGGAAACATATCCAAGGCATGCAGGTATATYTGTG[T/G]CATGACAACGGCTACCCCTCGCACGTTCGATTTACATGCCCCGGCCATTGAATTTAGTTCTGCAACATGAAAATTTGTATTCGTATCATTTGAAGCATAA
Ro06-7209251	Ro06	7209251	G	T	AGCGTGATAAATGCCAAGGCTTTCACGTGGCTATCTCAGCCAAAAAGTGTGGGTCTCTGCTCTCCACCCAGGGCAAGGCTCTGGGCTCTTTGTGCCCGAA[G/T]GATTGACCCAGGGGAGTTCTTGACCGGGCACCAATTAACTTGTGGAAGCTGTTTTTTGTATTTTCAGGGCTAGAATGACGTGGTGACCAGGTGAAAGCAA
Ro06-7211954	Ro06	7211954	A	G	TTTCTATTTAGCTTTGTGACTTAGAAAGCCTCTTATTTTTCCTATTGTGTCTGTTGATCTGTTCTATCTCCGAGTTCTGTTGGTGTGGCCGTATGGGAGA[A/G]AAACAAGGTTGTTGCCTTGAAGGGAGRGWGWGARGAGAGAGAGAGAGATGAGACGTGCAAGTGGGAGAAAACCAAACAAAAAAAATACCAYAAGTTAACA
Ro06-7211981	Ro06	7211981	G	A	GCCTCTTATTTTTCCTATTGTGTCTGTTGATCTGTTCTATCTCCGAGTTCTGTTGGTGTGGCCGTATGGGAGARAAACAAGGTTGTTGCCTTGAAGGGAG[G/A]GWGWGARGAGAGAGAGAGAGATGAGACGTGCAAGTGGGAGAAAACCAAACAAAAAAAATACCAYAAGTTAACAAGACCACGGGAAATTCTCACATGCCAA
Ro06-7211983	Ro06	7211983	A	T	CTCTTATTTTTCCTATTGTGTCTGTTGATCTGTTCTATCTCCGAGTTCTGTTGGTGTGGCCGTATGGGAGARAAACAAGGTTGTTGCCTTGAAGGGAGRG[A/T]GWGARGAGAGAGAGAGAGATGAGACGTGCAAGTGGGAGAAAACCAAACAAAAAAAATACCAYAAGTTAACAAGACCACGGGAAATTCTCACATGCCAATC
Ro06-7211985	Ro06	7211985	T	A	CTTATTTTTCCTATTGTGTCTGTTGATCTGTTCTATCTCCGAGTTCTGTTGGTGTGGCCGTATGGGAGARAAACAAGGTTGTTGCCTTGAAGGGAGRGWG[T/A]GARGAGAGAGAGAGAGATGAGACGTGCAAGTGGGAGAAAACCAAACAAAAAAAATACCAYAAGTTAACAAGACCACGGGAAATTCTCACATGCCAATCTT
Ro06-7211988	Ro06	7211988	G	A	ATTTTTCCTATTGTGTCTGTTGATCTGTTCTATCTCCGAGTTCTGTTGGTGTGGCCGTATGGGAGARAAACAAGGTTGTTGCCTTGAAGGGAGRGWGWGA[G/A]GAGAGAGAGAGAGATGAGACGTGCAAGTGGGAGAAAACCAAACAAAAAAAATACCAYAAGTTAACAAGACCACGGGAAATTCTCACATGCCAATCTTACA
Ro06-7212045	Ro06	7212045	T	C	TATGGGAGARAAACAAGGTTGTTGCCTTGAAGGGAGRGWGWGARGAGAGAGAGAGAGATGAGACGTGCAAGTGGGAGAAAACCAAACAAAAAAAATACCA[T/C]AAGTTAACAAGACCACGGGAAATTCTCACATGCCAATCTTACAATTGGTGGGAAAATTCTTGTGGGCCATAAGTGTTTCTCATCGACTCATCAATCATCA
Ro06-7212197	Ro06	7212197	C	T	GAAAATTCTTGTGGGCCATAAGTGTTTCTCATCGACTCATCAATCATCAATCATAGCTTTTGTGTTTTTTTTTTGTTGGAATCATCAGCTAAAAAATCAT[C/T]AYCCTTCGTTTTGGGGCAATAAACTAACATAGATTTTTAACGGTCTAGATGTAACCGTTGGAGATCCAACGGATAATATTGCATCTTTCAAAAATTATTA
Ro06-7212199	Ro06	7212199	T	C	AAATTCTTGTGGGCCATAAGTGTTTCTCATCGACTCATCAATCATCAATCATAGCTTTTGTGTTTTTTTTTTGTTGGAATCATCAGCTAAAAAATCATYA[T/C]CCTTCGTTTTGGGGCAATAAACTAACATAGATTTTTAACGGTCTAGATGTAACCGTTGGAGATCCAACGGATAATATTGCATCTTTCAAAAATTATTAAA
Ro06-7230797	Ro06	7230797	G	A	CACAGTATCATACAATTTCAAGTATTCACCCATCTTCAGTTTGTGATCAAACCACACTGTTGGGTCAATCAAAAATAATATGCCATTGAGTTGGGAATTA[G/A]GCTAATTAACAAGTATGGTCCTGTATTTTTCTCTGTGCAGGTCACATACTTCAAATGTGGTGGAGTGTCACTTGGTGTTGGCATGCAACATCATGCTGCA
Ro06-7270196	Ro06	7270196	T	C	AGATGAACCTATTAGCTAGAGCACGCGACCTTTCAGTCGGATTCCCACATCCAAGTGCACCTATTGTTGAAGGGTCTACAAAACTAACCATGTCCACCAT[T/C]TTTGATTTCTTAAGTAMCTCAAACAAGTAGCTGCAAATAACACAATCTTAGCATGCAAAAATTTGCAAAGTAGTAAATTGTAAAGATAAAAGATATATAA
Ro06-7270213	Ro06	7270213	C	A	AGAGCACGCGACCTTTCAGTCGGATTCCCACATCCAAGTGCACCTATTGTTGAAGGGTCTACAAAACTAACCATGTCCACCATYTTTGATTTCTTAAGTA[C/A]CTCAAACAAGTAGCTGCAAATAACACAATCTTAGCATGCAAAAATTTGCAAAGTAGTAAATTGTAAAGATAAAAGATATATAATCATATGCATTAATTTC
Ro06-7278379	Ro06	7278379	A	G	TCATGTACTTTCTCTTCATGCATAACCATGGGGGAAGATTATAGCTCACAAGTATGACAGGCCAACAAGAATATCTACTGGAAAGAGAACTGTGCGGATT[A/G]AACCCATCAGRCGAAAGTGSTAGCCTAAGATTCCTTGGCTCTAACCCAAATTCMGGCCACTTTTCGTCCACTAACTTCCAAGTACGAGAATCTRCTGGAT
Ro06-7278390	Ro06	7278390	A	G	CTCTTCATGCATAACCATGGGGGAAGATTATAGCTCACAAGTATGACAGGCCAACAAGAATATCTACTGGAAAGAGAACTGTGCGGATTRAACCCATCAG[A/G]CGAAAGTGSTAGCCTAAGATTCCTTGGCTCTAACCCAAATTCMGGCCACTTTTCGTCCACTAACTTCCAAGTACGAGAATCTRCTGGATGACGCATTTTA
Ro06-7278399	Ro06	7278399	C	G	CATAACCATGGGGGAAGATTATAGCTCACAAGTATGACAGGCCAACAAGAATATCTACTGGAAAGAGAACTGTGCGGATTRAACCCATCAGRCGAAAGTG[C/G]TAGCCTAAGATTCCTTGGCTCTAACCCAAATTCMGGCCACTTTTCGTCCACTAACTTCCAAGTACGAGAATCTRCTGGATGACGCATTTTATCATCCTTA
Ro06-7278433	Ro06	7278433	C	A	TGACAGGCCAACAAGAATATCTACTGGAAAGAGAACTGTGCGGATTRAACCCATCAGRCGAAAGTGSTAGCCTAAGATTCCTTGGCTCTAACCCAAATTC[C/A]GGCCACTTTTCGTCCACTAACTTCCAAGTACGAGAATCTRCTGGATGACGCATTTTATCATCCTTAACTCGCTCATTAGCATGCCAAGTTAGATCTTGAG
Ro06-7278473	Ro06	7278473	G	A	CGGATTRAACCCATCAGRCGAAAGTGSTAGCCTAAGATTCCTTGGCTCTAACCCAAATTCMGGCCACTTTTCGTCCACTAACTTCCAAGTACGAGAATCT[G/A]CTGGATGACGCATTTTATCATCCTTAACTCGCTCATTAGCATGCCAAGTTAGATCTTGAGCTGTACTTGTTGATTGAAACATTCTCTTGAACCTTGATAT
Ro06-7278604	Ro06	7278604	C	T	GCTCATTAGCATGCCAAGTTAGATCTTGAGCTGTACTTGTTGATTGAAACATTCTCTTGAACCTTGATATTGGTGGAAAGTACCACAACACCTTCCCGGG[C/T]ACCCCTACTTTCTCGATTTTATCCTTACCCAATTTCCACCTAGAAATCCCACAATTAGGGCAACTAGTGGCATCAACATTACTATCTCTATATAAGATAC
Ro06-7341051	Ro06	7341051	G	A	AGGGTTCTTTTGAGGCTCTCTCATTTTATTGAACTACTATCTCTACATTCTCCTTCTGAAATATTCTATATTCTAGGCAACATGCTGTCTCTTGACAATC[G/A]AATCTGCTGTGCAAAATAAATGGTTGTGGAAAAGGAMGATTTTCTCTTAAATTGCTTTTTGAGTAGTTCATATCTTGAAGAATATTGTGCATATTCTGCT
Ro06-7341088	Ro06	7341088	A	C	TATCTCTACATTCTCCTTCTGAAATATTCTATATTCTAGGCAACATGCTGTCTCTTGACAATCRAATCTGCTGTGCAAAATAAATGGTTGTGGAAAAGGA[A/C]GATTTTCTCTTAAATTGCTTTTTGAGTAGTTCATATCTTGAAGAATATTGTGCATATTCTGCTAGTAATGTTGTGAAGAATTGATCATGTATTGAATGAG
Ro06-7362476	Ro06	7362476	C	A	AGTTACAAAGATAAGAACTGAGTAGACCACACTTAAAATGAATTGAATTGATAAGGTAAACTGAAACTATAGATCTGCACAAGCTATACAATGAAATAAG[C/A]AGYATGGTTAACTCTCCTMCTGATTAGATGTCACTTGCTAATCCCCAAAAGATCAGTTTTCCTACATTATGTTGTTGAAATTAACTTTACAAAGTCTCTC
Ro06-7362479	Ro06	7362479	C	T	TACAAAGATAAGAACTGAGTAGACCACACTTAAAATGAATTGAATTGATAAGGTAAACTGAAACTATAGATCTGCACAAGCTATACAATGAAATAAGMAG[C/T]ATGGTTAACTCTCCTMCTGATTAGATGTCACTTGCTAATCCCCAAAAGATCAGTTTTCCTACATTATGTTGTTGAAATTAACTTTACAAAGTCTCTCAAT
Ro06-7362495	Ro06	7362495	C	A	GAGTAGACCACACTTAAAATGAATTGAATTGATAAGGTAAACTGAAACTATAGATCTGCACAAGCTATACAATGAAATAAGMAGYATGGTTAACTCTCCT[C/A]CTGATTAGATGTCACTTGCTAATCCCCAAAAGATCAGTTTTCCTACATTATGTTGTTGAAATTAACTTTACAAAGTCTCTCAATGCAGACAGATTTGACC
Ro06-7373813	Ro06	7373813	A	T	GCATTAGAAAAAGGAGAAGAGTATAGTGATTACTACGTAAGAAAATTAATATTTCTTATTTAAAGGATGCATGTTTCAACTTTTATTAGTTAGAAAAGCC[A/T]AAAGTTGGTAATAAACTATGAGTCTATGAGCTCCTCGATCTTTTCTGTTTTAAAACYCAAAAGGCCGGGACGCGAGAATCACGTTGGARTGCACTTTTTC
Ro06-7373870	Ro06	7373870	T	C	ATTTAAAGGATGCATGTTTCAACTTTTATTAGTTAGAAAAGCCWAAAGTTGGTAATAAACTATGAGTCTATGAGCTCCTCGATCTTTTCTGTTTTAAAAC[T/C]CAAAAGGCCGGGACGCGAGAATCACGTTGGARTGCACTTTTTCTGCGCTAGGGTTAAGATCCACACTGTGCTCGATCAAAGTTGGCATGTGAAACATTTG
Ro06-7373902	Ro06	7373902	G	A	TTAGAAAAGCCWAAAGTTGGTAATAAACTATGAGTCTATGAGCTCCTCGATCTTTTCTGTTTTAAAACYCAAAAGGCCGGGACGCGAGAATCACGTTGGA[G/A]TGCACTTTTTCTGCGCTAGGGTTAAGATCCACACTGTGCTCGATCAAAGTTGGCATGTGAAACATTTGTTAGTGGCCTAATGGCTCCACGTTTTGGCCTT
Ro06-7380630	Ro06	7380630	C	T	ACTTCATGGGTTCCGATCGGGTTTTCCGTTCTCGGCCACGACAGCGTCTGAAACTAATTCCTTTGGCTTTGCCTCGATGATCTGAGTACGAATATGGTCT[C/T]AGATGCTCAAATCGATCAAAATTGGGTGAGAATTGAAGCTCCAAAGCTTCTTGGCTTTCCGGCGGGTTTCTGCGTTTTTCCGGCCATGAACGGCGACAAG
Ro06-7390708	Ro06	7390708	G	T	CTGATCTATCCTTTTAATCACCAACCGAATAATTGAAACAGGAATCTATTGAACGAACTGCACTCCTTATAAGTCAGGAGTCCATTGATGAGAAGGAGCT[G/T]GGAAAGAGCCCAATTCCTACAGTAATGGATATTACAGAACTGAAATAGTTCATGCATTATAACATGCAATATAGCAAGTTATAGTCTGATGTTCAGAAAT
Ro06-7467080	Ro06	7467080	T	C	CTTCACGGTTGTTTCTTATGTGGCTCAATGCAATCTCATATGCTTCATCAGACAATCTCTTAATAGCAGAATCAATGTCTTCGGCAAGCTTTTCTGACAT[T/C]GAGTTCCTTGCCATCATTCTCATTATGACATCACCACTCTGAGCCGCATCCATCAATGACCATGGACCAATGTCAGACATTCCAAATGTAGTTACCATCT
Ro06-7467204	Ro06	7467204	A	G	TATGACATCACCACTCTGAGCCGCATCCATCAATGACCATGGACCAATGTCAGACATTCCAAATGTAGTTACCATCTGCAATAGTGTCGATTAATGCCTC[A/G]GTCCAATTGATTAACATGTTAAATGAGCTAAGGACAGGGTTCTCTTAAAGCAATCAACTACAGGAGCGCAGTAGGAATGGCATTGAAAACTGCTTGAAAA
Ro06-7481020	Ro06	7481020	C	T	GGACTGCCCATATCAACTAGGAAGCAGACCATTAATTCTGTAACATATATTATATGGTTATCAGCAAGAAACAGTCACCAGAGCCAAATTCTTTCAAGAT[C/T]CACAGCRATAAGCCTTGATTCATCATTCCACCCTCTAGAAAGTAGATACCATGAGCACAGGACAAGCTTGACTCTGGAAACTTGTGGTCTAATGGTGCCA
Ro06-7481027	Ro06	7481027	G	A	CCATATCAACTAGGAAGCAGACCATTAATTCTGTAACATATATTATATGGTTATCAGCAAGAAACAGTCACCAGAGCCAAATTCTTTCAAGATYCACAGC[G/A]ATAAGCCTTGATTCATCATTCCACCCTCTAGAAAGTAGATACCATGAGCACAGGACAAGCTTGACTCTGGAAACTTGTGGTCTAATGGTGCCATTCAAAG
Ro06-7512665	Ro06	7512665	C	A	GGGTGACATTTCCTCCTCTAAGGGTTGAATTAAAACCTATATACCATCACAAATTATGAAGCAAACTTTACGTATTCCACAGATTGTGTGCATGTGAGCA[C/A]TTATTCAATRAACTCTWACCAGCAAATACATCTTCACTCAAATTGATGCCACAAGAAGCCTTGCTCATGCCACCCCGAGTAATGTGGAAGATCCGATCAA
Ro06-7512675	Ro06	7512675	G	A	TCCTCCTCTAAGGGTTGAATTAAAACCTATATACCATCACAAATTATGAAGCAAACTTTACGTATTCCACAGATTGTGTGCATGTGAGCAMTTATTCAAT[G/A]AACTCTWACCAGCAAATACATCTTCACTCAAATTGATGCCACAAGAAGCCTTGCTCATGCCACCCCGAGTAATGTGGAAGATCCGATCAAAAACATCTGG
Ro06-7512682	Ro06	7512682	T	A	CTAAGGGTTGAATTAAAACCTATATACCATCACAAATTATGAAGCAAACTTTACGTATTCCACAGATTGTGTGCATGTGAGCAMTTATTCAATRAACTCT[T/A]ACCAGCAAATACATCTTCACTCAAATTGATGCCACAAGAAGCCTTGCTCATGCCACCCCGAGTAATGTGGAAGATCCGATCAAAAACATCTGGATGTCCA
Ro06-7531895	Ro06	7531895	G	A	GCAAACTTGTATTTCTCTTTCAACGGCGGAAGTCGAGTATATTGTTGCGGGTAGTTGTTGTACCCAACTTCTTTGGATGAAAAACATGCTTAAAGACTAT[G/A]GTTTTCCTCAAACTTCCTTTGATCTCTACTGTGATAATACAAGTGCTATACAAATCGCCAAAAATCCAGTTCAACACACTAAGACTAAGCATATTGATCT
Ro06-7537754	Ro06	7537754	C	T	GTCTGTAAATTATACAACGAACAGATGACCAAACAATCTCCAATTCGGCTGATTTTTTGCAAGGATAATTCTTGAAAATAAATCTAAACGATGAACGGTT[C/T]CGATGATTGAGTTATGTTGTCAATTGGTCGGAATGCATATGTTCGCATTTTACTTTACGTGYGGACGTGCGCATGTGAAGGGGACTATATATATATATAT
Ro06-7537816	Ro06	7537816	C	T	GGATAATTCTTGAAAATAAATCTAAACGATGAACGGTTYCGATGATTGAGTTATGTTGTCAATTGGTCGGAATGCATATGTTCGCATTTTACTTTACGTG[C/T]GGACGTGCGCATGTGAAGGGGACTATATATATATATATATATTTTTTTTTTCCTACCCGGGCTGTAGCCCAGTCTAACCCAAGCATAGCTCCGCCCTTGA
Ro06-7549231	Ro06	7549231	C	T	TGAGGTTCTTGTCATGCCAGACCTTGGTCTTGTCCTTGAACAAGGCTGCACTCTCATAAGCTTCATTGCGGATTTCAGCAAGCTCATTCAAGTCCAACCT[C/T]CTCTTGTCACCGGCTGCTCTTAAGTCCCAATTCATGGCCTTTACAGCCCAAAACGCTCGGTGCTCCAGCTCTACTGGCATGTGGCAAGCTTTGCCATASA
Ro06-7549330	Ro06	7549330	C	G	TYCTCTTGTCACCGGCTGCTCTTAAGTCCCAATTCATGGCCTTTACAGCCCAAAACGCTCGGTGCTCCAGCTCTACTGGCATGTGGCAAGCTTTGCCATA[C/G]ACAAGTCTATAGGGAGACATACCCAAAGGGGTCTTGTAAGCAGTTCTATAAGCCCACAACACATCAAGAAGTTTTGTGCTCCAATCYTTCCTAGTAGTGT
Ro06-7549417	Ro06	7549417	C	T	AAGCTTTGCCATASACAAGTCTATAGGGAGACATACCCAAAGGGGTCTTGTAAGCAGTTCTATAAGCCCACAACACATCAAGAAGTTTTGTGCTCCAATC[C/T]TTCCTAGTAGTGTTGACAGCCTTCTCCAAAATAGACTTGATTTCTCGATTAGAGACCTCAACTTGGCCACTGGTCTGTGGATGATAAGGTGTGGCAACCT
Ro06-7550508	Ro06	7550508	C	T	TCGGTATGCACAATCACCTTGGAGCCTATAAGATAGCTCCGAAACTTCTCCAAAGCAAAGATAATAGCTAGGAGCTCCTTCTCGGTTGTGGTGTAGTTCA[C/T]TTGAGCATCATTCAATGTCCGAGAAGCATAGTAGATAGCATGCARCATCTTCTCTGTCCGCTGCCCCAAAACAGCACCCATAGCATAATCGGATGCGTCA
Ro06-7550553	Ro06	7550553	A	G	TTCTCCAAAGCAAAGATAATAGCTAGGAGCTCCTTCTCGGTTGTGGTGTAGTTCAYTTGAGCATCATTCAATGTCCGAGAAGCATAGTAGATAGCATGCA[A/G]CATCTTCTCTGTCCGCTGCCCCAAAACAGCACCCATAGCATAATCGGATGCGTCACACATGAGCTCAAAGGGGAGCRTCCAATCCGGCACACACATGATA
Ro06-7550630	Ro06	7550630	G	A	AGAAGCATAGTAGATAGCATGCARCATCTTCTCTGTCCGCTGCCCCAAAACAGCACCCATAGCATAATCGGATGCGTCACACATGAGCTCAAAGGGGAGC[G/A]TCCAATCCGGCACACACATGATAGGAGCACTAATCAATAGCTCCTTAATCTCCTCAAATGCCGWCATGCACTTCTCATCAAAGCTCCAAGCAACATCCTT
Ro06-7550694	Ro06	7550694	A	T	TAATCGGATGCGTCACACATGAGCTCAAAGGGGAGCRTCCAATCCGGCACACACATGATAGGAGCACTAATCAATAGCTCCTTAATCTCCTCAAATGCCG[A/T]CATGCACTTCTCATCAAAGCTCCAAGCAACATCCTTGGAGAGTAGATCACACAATGGCTTCGAAATCTTGGAGAAGTCCTTTATAAACCTTCGGTAAAAA
Ro06-7551029	Ro06	7551029	C	T	TACCATGAAGTGGCACTTCTCCCAATTAAGCACAAGGCTTGTCTCCACACATCTCCTTAGCACAAGAGCCAAGTGTGCTAGGCACTCCTCAAAAGAATTC[C/T]CATGGACAGAAAAATCATCCATGAAAATCTCCATAAAGTTCTCYGTCATGTCATGAAACAAWGCCATCATRCACCTTTGAAATGTGGCCGGTGCATTGCA
Ro06-7551073	Ro06	7551073	C	T	CCACACATCTCCTTAGCACAAGAGCCAAGTGTGCTAGGCACTCCTCAAAAGAATTCYCATGGACAGAAAAATCATCCATGAAAATCTCCATAAAGTTCTC[C/T]GTCATGTCATGAAACAAWGCCATCATRCACCTTTGAAATGTGGCCGGTGCATTGCATAAACCGAAAGGCATTCGACGGTAGGCGAAGGTGCCAAAAGGAC
Ro06-7551091	Ro06	7551091	T	A	CAAGAGCCAAGTGTGCTAGGCACTCCTCAAAAGAATTCYCATGGACAGAAAAATCATCCATGAAAATCTCCATAAAGTTCTCYGTCATGTCATGAAACAA[T/A]GCCATCATRCACCTTTGAAATGTGGCCGGTGCATTGCATAAACCGAAAGGCATTCGACGGTAGGCGAAGGTGCCAAAAGGACATGTGAAAGTGGTCTTCT
Ro06-7551100	Ro06	7551100	A	G	AGTGTGCTAGGCACTCCTCAAAAGAATTCYCATGGACAGAAAAATCATCCATGAAAATCTCCATAAAGTTCTCYGTCATGTCATGAAACAAWGCCATCAT[A/G]CACCTTTGAAATGTGGCCGGTGCATTGCATAAACCGAAAGGCATTCGACGGTAGGCGAAGGTGCCAAAAGGACATGTGAAAGTGGTCTTCTCTTGGTCCT
Ro06-7552765	Ro06	7552765	A	T	ACAATTTATACTACAAGAATAGTGCAAAGACACCCCGGCTGCGGGTCACCAAGGAATCAAGGATGAACCTCAATCCCCGGCAGCGGCGCCATTTGACTCA[A/T]CGATAATTACGGGGTGAATGTGAGTATCGCCGTCAAAGTGTAGTGGATGGTAAATTATGACCAGGGGTTGTCGTACCCAAGGGATTGGAAGGCCCAAAAT
Ro06-7612122	Ro06	7612122	T	C	TTTAAAGTTACACAGGGACCTAAAGCCCCAAAGACTGAAACAATGTCGTTTTGAAGCTCTTGATTACAGTAATGAAACTACATATATGTTGCAAAGGCGT[T/C]AAGCTACTAATGGTCTGAATTAACAGTACTAATGATTTGAACTAAAATGAGGAARTAAGCAATGAAAATGAACTAAAACGTARTGYACCAAGCATGCAGC
Ro06-7612177	Ro06	7612177	G	A	GCTCTTGATTACAGTAATGAAACTACATATATGTTGCAAAGGCGTYAAGCTACTAATGGTCTGAATTAACAGTACTAATGATTTGAACTAAAATGAGGAA[G/A]TAAGCAATGAAAATGAACTAAAACGTARTGYACCAAGCATGCAGCATTTTAACTCCATCAACAAAAGTAAGCAAGTTTCTAACCCAAATCTATCGAAAGT
Ro06-7612205	Ro06	7612205	G	A	ATATGTTGCAAAGGCGTYAAGCTACTAATGGTCTGAATTAACAGTACTAATGATTTGAACTAAAATGAGGAARTAAGCAATGAAAATGAACTAAAACGTA[G/A]TGYACCAAGCATGCAGCATTTTAACTCCATCAACAAAAGTAAGCAAGTTTCTAACCCAAATCTATCGAAAGTAACTTCAATAATCACTGCTCCAACGTTA
Ro06-7612208	Ro06	7612208	C	T	TGTTGCAAAGGCGTYAAGCTACTAATGGTCTGAATTAACAGTACTAATGATTTGAACTAAAATGAGGAARTAAGCAATGAAAATGAACTAAAACGTARTG[C/T]ACCAAGCATGCAGCATTTTAACTCCATCAACAAAAGTAAGCAAGTTTCTAACCCAAATCTATCGAAAGTAACTTCAATAATCACTGCTCCAACGTTAACA
Ro06-7615768	Ro06	7615768	C	T	TATGAAGTAGCTGTGCAATTCAAAAGCACTAAATAGACTTCCATTATTCTTCCTCTACTTGCTCCTTCATGGAATCTGCAAATCAAGTTGCTCTATCAAG[C/T]AAAGCTAGACTCTCCATGTAATATTCAATACATGTGTACCCTGGATCTGTATGAATTCCAAGAAACTCATTTCTGTTTTTCTTCGGATCATGAAGGACTA
Ro06-7626856	Ro06	7626856	G	A	TATATTATATATACAAACTTTATGAAGAAATCAAAGTGGTCATTTTTGCTTTCACGAAATTGACCTGCTGCAAATAGCATGTAACTATAATTTCACCATC[G/A]ACACCTCYCAAAATTTCATTCTAGGCAAACAAAACAATTAAAGGAYGTTACAACTTGCTCATCCAATTTTATTAATTCCATACATTTCAGCATCAGATCC
Ro06-7626864	Ro06	7626864	C	T	ATATACAAACTTTATGAAGAAATCAAAGTGGTCATTTTTGCTTTCACGAAATTGACCTGCTGCAAATAGCATGTAACTATAATTTCACCATCRACACCTC[C/T]CAAAATTTCATTCTAGGCAAACAAAACAATTAAAGGAYGTTACAACTTGCTCATCCAATTTTATTAATTCCATACATTTCAGCATCAGATCCTAGAACAT
Ro06-7626902	Ro06	7626902	C	T	TGCTTTCACGAAATTGACCTGCTGCAAATAGCATGTAACTATAATTTCACCATCRACACCTCYCAAAATTTCATTCTAGGCAAACAAAACAATTAAAGGA[C/T]GTTACAACTTGCTCATCCAATTTTATTAATTCCATACATTTCAGCATCAGATCCTAGAACATTTCTGCATTCATATATACAAACAAGGCTTCTTATGTTT
Ro06-7627026	Ro06	7627026	T	A	TATTAATTCCATACATTTCAGCATCAGATCCTAGAACATTTCTGCATTCATATATACAAACAAGGCTTCTTATGTTTCCAGGAAATCGCATGTATCCACA[T/A]ATGGGATAATGTGTGAAGGTGCAAAATCATTTCACTATGATCAAATCCACATATTACTYATATTACATGAAATGATTTTATCATAGCCACAACTGATGAT
Ro06-7627085	Ro06	7627085	C	T	ACAAGGCTTCTTATGTTTCCAGGAAATCGCATGTATCCACAWATGGGATAATGTGTGAAGGTGCAAAATCATTTCACTATGATCAAATCCACATATTACT[C/T]ATATTACATGAAATGATTTTATCATAGCCACAACTGATGATCCTATAAATAGTGCAAGAACCCTACAGAAGAAAGATATGTGAATTTCATCATTGAAATC
Ro06-7637167	Ro06	7637167	C	T	CACATCATATTCAACATTGACCCGTCGATTGCATCAACCTTATGTAGGGAAATCAAATCTGGTGAACTTAATGGGAAGTTTAGACTGAAACAGAATCTCT[C/T]GGAATGTTTGGTGAAGAGAAATACTTATTGCCCACATTTAATTCACATCTCCCTTTCTTTGAGAGAGTCTATCWWACACAAAATTCTTTYAAGAGGAAAA
Ro06-7637241	Ro06	7637241	A	T	GAAGTTTAGACTGAAACAGAATCTCTYGGAATGTTTGGTGAAGAGAAATACTTATTGCCCACATTTAATTCACATCTCCCTTTCTTTGAGAGAGTCTATC[A/T]WACACAAAATTCTTTYAAGAGGAAAAAWCCATACACCMTCTTCCAGAAAGTAAAATCCAATGGGATAGGATTGAAGCTTAGGCATGTTGACAAGCTCAAA
Ro06-7637242	Ro06	7637242	T	A	AAGTTTAGACTGAAACAGAATCTCTYGGAATGTTTGGTGAAGAGAAATACTTATTGCCCACATTTAATTCACATCTCCCTTTCTTTGAGAGAGTCTATCW[T/A]ACACAAAATTCTTTYAAGAGGAAAAAWCCATACACCMTCTTCCAGAAAGTAAAATCCAATGGGATAGGATTGAAGCTTAGGCATGTTGACAAGCTCAAAC
Ro06-7637257	Ro06	7637257	C	T	CAGAATCTCTYGGAATGTTTGGTGAAGAGAAATACTTATTGCCCACATTTAATTCACATCTCCCTTTCTTTGAGAGAGTCTATCWWACACAAAATTCTTT[C/T]AAGAGGAAAAAWCCATACACCMTCTTCCAGAAAGTAAAATCCAATGGGATAGGATTGAAGCTTAGGCATGTTGACAAGCTCAAACACTAACAAAATTAAA
Ro06-7637269	Ro06	7637269	T	A	GAATGTTTGGTGAAGAGAAATACTTATTGCCCACATTTAATTCACATCTCCCTTTCTTTGAGAGAGTCTATCWWACACAAAATTCTTTYAAGAGGAAAAA[T/A]CCATACACCMTCTTCCAGAAAGTAAAATCCAATGGGATAGGATTGAAGCTTAGGCATGTTGACAAGCTCAAACACTAACAAAATTAAACAATATCAAAAT
Ro06-7637279	Ro06	7637279	A	C	TGAAGAGAAATACTTATTGCCCACATTTAATTCACATCTCCCTTTCTTTGAGAGAGTCTATCWWACACAAAATTCTTTYAAGAGGAAAAAWCCATACACC[A/C]TCTTCCAGAAAGTAAAATCCAATGGGATAGGATTGAAGCTTAGGCATGTTGACAAGCTCAAACACTAACAAAATTAAACAATATCAAAATCGACTGCATA
Ro06-7641699	Ro06	7641699	G	A	AAAATACTACCTTCAAATGCAAAAAAGCTTGAAATTTCAAATAATTATACCAAATTTGTATCTTAAAGAATGTGACACTTATTTCTATATCATTTTTTTT[G/A]TTACATCGGAGGAGTTCAAATTTCTTATCTAGTCTAATTTAAATTCAAATTCAATTTTCTATCCTCCTTCGCTTCTTAAACTAACCCTAAAAGTTTTGTC
Ro06-7641853	Ro06	7641853	T	G	ATTTTCTATCCTCCTTCGCTTCTTAAACTAACCCTAAAAGTTTTGTCATATGACTTGCATCATCATTTTCACTTTAACAGTTTCATGCATGTTTTCAAAT[T/G]AAATAGCTTTTAGATTGAAGGTATTAATTTGTGATTGATTTTGCATGACTTGAACAAAGTCTGCATTGCTTGCTATATATATGATTACACGAATTAAGCA
Ro06-7645602	Ro06	7645602	T	C	ATTAGATTTGGATGAGATTACACATACAATCAAACAGTGTGTGCACAGTTTTTACGATTTCAAGACACTGGATCTCTTTAGGGATTATTTTAGGTGTGTG[T/C]AACTGTGTATAGGTGGTGTAGCTGAGTGAAGTGGCGGAGATGTTTGAGGATGTGTTATGCAAATCAATGGCCTTTGAGGAAGCTTTCTAGTATATACTGA
Ro06-7652888	Ro06	7652888	C	T	TCAGCCTTTGCCTAGCGCGTGGGTCTCTTCCCTCTCCAGACAGGCGTGGCCCACCTCTGTCCCAAGCCAACAGTAATGGGTTTTTGACCCAAAAATCCGC[C/T]CAAAATGACTAGGTTCTTTAGTAGGAACCCAAAATGAGTTTTGGGTATTGATTGTTGGAGATCAAATATATGGGTTTTGGGTATGGGTATGGCTTTTGGG
Ro06-7654695	Ro06	7654695	C	T	TGCATGTGTCTAGAACAGGCTAGGTGTAATATTCTAGATCTTGATTTCTGTAATATGGCACTCATTAGGGTTGGTCTTGAAGGCTATTTGGATGCATATG[C/T]ATGCTATGAAAGAGCCTTTCTTTTCTTTTGATTTACCACAAGTCTTTGTAATGTCACATCACATGCATCTCATTAATTAATAAGGGTTTCATGAGACACT
Ro06-7656218	Ro06	7656218	G	A	AACATTATCACTATAATGGATGAATATTCCGAGAAGATGATAATGACCTGTGTATGAAACTCTGATGATGTATATTCAATGGAATTGATCTTTTGAGGAG[G/A]CTTAGAGGGAAGAGCATCATGTTTATTGGGGACTCATTGAGTCTGAACCAATGGCAATCACTCACTTGCATGCTTCATACGGCTGTTCCAAATGACAAAT
Ro06-7734287	Ro06	7734287	C	A	TTGGCGAGAGAAAATGGAGTGTTTCTATCTAGGGTTTCTTTGATCGTCCAAGACTGAATGAGAACAGGGTCTGGTTGGTCTCCTCAGCCTCCAAGGGTTC[C/A]CTAGKGTTTCCTAGTGGRGAGAGTAAACAAAGGTGAGTGGWGGGAAAAGAAATGGAAAAGAAAGGTGAAGTGGAGGRATTTKTGGATGAGTGGGGGAACT
Ro06-7734292	Ro06	7734292	G	T	GAGAGAAAATGGAGTGTTTCTATCTAGGGTTTCTTTGATCGTCCAAGACTGAATGAGAACAGGGTCTGGTTGGTCTCCTCAGCCTCCAAGGGTTCMCTAG[G/T]GTTTCCTAGTGGRGAGAGTAAACAAAGGTGAGTGGWGGGAAAAGAAATGGAAAAGAAAGGTGAAGTGGAGGRATTTKTGGATGAGTGGGGGAACTAGTGG
Ro06-7734305	Ro06	7734305	A	G	GTGTTTCTATCTAGGGTTTCTTTGATCGTCCAAGACTGAATGAGAACAGGGTCTGGTTGGTCTCCTCAGCCTCCAAGGGTTCMCTAGKGTTTCCTAGTGG[A/G]GAGAGTAAACAAAGGTGAGTGGWGGGAAAAGAAATGGAAAAGAAAGGTGAAGTGGAGGRATTTKTGGATGAGTGGGGGAACTAGTGGAYATGTCATCAGC
Ro06-7734328	Ro06	7734328	A	T	GATCGTCCAAGACTGAATGAGAACAGGGTCTGGTTGGTCTCCTCAGCCTCCAAGGGTTCMCTAGKGTTTCCTAGTGGRGAGAGTAAACAAAGGTGAGTGG[A/T]GGGAAAAGAAATGGAAAAGAAAGGTGAAGTGGAGGRATTTKTGGATGAGTGGGGGAACTAGTGGAYATGTCATCAGCCATGCACATGTGTGCAGCTGGTG
Ro06-7734364	Ro06	7734364	G	A	GTCTCCTCAGCCTCCAAGGGTTCMCTAGKGTTTCCTAGTGGRGAGAGTAAACAAAGGTGAGTGGWGGGAAAAGAAATGGAAAAGAAAGGTGAAGTGGAGG[G/A]ATTTKTGGATGAGTGGGGGAACTAGTGGAYATGTCATCAGCCATGCACATGTGTGCAGCTGGTGTAGGAGACTCTCTTCTTCTGTGGTGGTGCTCCGGTG
Ro06-7734369	Ro06	7734369	G	T	CTCAGCCTCCAAGGGTTCMCTAGKGTTTCCTAGTGGRGAGAGTAAACAAAGGTGAGTGGWGGGAAAAGAAATGGAAAAGAAAGGTGAAGTGGAGGRATTT[G/T]TGGATGAGTGGGGGAACTAGTGGAYATGTCATCAGCCATGCACATGTGTGCAGCTGGTGTAGGAGACTCTCTTCTTCTGTGGTGGTGCTCCGGTGGTGGT
Ro06-7734394	Ro06	7734394	C	T	TTTCCTAGTGGRGAGAGTAAACAAAGGTGAGTGGWGGGAAAAGAAATGGAAAAGAAAGGTGAAGTGGAGGRATTTKTGGATGAGTGGGGGAACTAGTGGA[C/T]ATGTCATCAGCCATGCACATGTGTGCAGCTGGTGTAGGAGACTCTCTTCTTCTGTGGTGGTGCTCCGGTGGTGGTCCGGCGGTGGTGCCGCCTCTTGTGC
Ro06-7735918	Ro06	7735918	G	A	CAAGCGGTCTTTGAGCAAGTTCTAGGTCCAAACCTTATGCAATGTTCACACATGAAGAACAAATATAGACATGAAAGATGCATACATGTGCATATTCAAT[G/A]GGCTCAAAACCTCACATTTTCTGGGTRTGCATGGAAATACATGTCAAGTGTGCTTCTCGGATTGCAATCAACGAATCAACAATGGTGAAGTGTACATGGT
Ro06-7735945	Ro06	7735945	A	G	CCAAACCTTATGCAATGTTCACACATGAAGAACAAATATAGACATGAAAGATGCATACATGTGCATATTCAATRGGCTCAAAACCTCACATTTTCTGGGT[A/G]TGCATGGAAATACATGTCAAGTGTGCTTCTCGGATTGCAATCAACGAATCAACAATGGTGAAGTGTACATGGTGATCAAGCAATCATGAATCATGCATAT
Ro06-7736500	Ro06	7736500	T	G	TCGAAAAAATTGAAACATTTTGGCCAAAACGAACCCAATCTCACCCCCACACTTAAACTTAACATTGTCCCCAATGTGATAAGTGAATTCAACAATAAAC[T/G]TTGGGTGAGAAAACATGACAAACAATCACAAACACACAAAACAWACAAGAATGAAAACAAACAAAGATAGAAGTACTCCCCTTCGAAGCGCATGCTTTCC
Ro06-7736544	Ro06	7736544	A	T	CCCCACACTTAAACTTAACATTGTCCCCAATGTGATAAGTGAATTCAACAATAAACKTTGGGTGAGAAAACATGACAAACAATCACAAACACACAAAACA[A/T]ACAAGAATGAAAACAAACAAAGATAGAAGTACTCCCCTTCGAAGCGCATGCTTTCCGTTTAGACAYGAACAATCACCAACAACAAGGTTTCAAGACCTTG
Ro06-7736610	Ro06	7736610	C	T	AAAACATGACAAACAATCACAAACACACAAAACAWACAAGAATGAAAACAAACAAAGATAGAAGTACTCCCCTTCGAAGCGCATGCTTTCCGTTTAGACA[C/T]GAACAATCACCAACAACAAGGTTTCAAGACCTTGCAATCYAATGCTCACGACCTTTGGTGATGCTAATCATGATGTACTTCAACAGTCGGGGATATGGRG
Ro06-7736650	Ro06	7736650	C	T	AATGAAAACAAACAAAGATAGAAGTACTCCCCTTCGAAGCGCATGCTTTCCGTTTAGACAYGAACAATCACCAACAACAAGGTTTCAAGACCTTGCAATC[C/T]AATGCTCACGACCTTTGGTGATGCTAATCATGATGTACTTCAACAGTCGGGGATATGGRGCTGCCTCCCYATGAGCGCTTGTTTTTAGAGACCCTCAAGC
Ro06-7736709	Ro06	7736709	G	A	AYGAACAATCACCAACAACAAGGTTTCAAGACCTTGCAATCYAATGCTCACGACCTTTGGTGATGCTAATCATGATGTACTTCAACAGTCGGGGATATGG[G/A]GCTGCCTCCCYATGAGCGCTTGTTTTTAGAGACCCTCAAGCCGGTCTTTTCCTCCTTCATTCTTCATGGAGGCTGGTAGCTCTCCTTCTTACCACCCACC
Ro06-7736720	Ro06	7736720	C	T	CCAACAACAAGGTTTCAAGACCTTGCAATCYAATGCTCACGACCTTTGGTGATGCTAATCATGATGTACTTCAACAGTCGGGGATATGGRGCTGCCTCCC[C/T]ATGAGCGCTTGTTTTTAGAGACCCTCAAGCCGGTCTTTTCCTCCTTCATTCTTCATGGAGGCTGGTAGCTCTCCTTCTTACCACCCACCATAGTGGTCTT
Ro06-7737793	Ro06	7737793	A	T	CAATGAATTCCTTCCGATACTTGTTGTTCTTCTTCTGTAAATCCTCCTTCCTTTGAGCTTGAGGGAATGGAAGAGGCACTTGATGAGTTGTTACATGCAA[A/T]GGAGGTATRCTCARRTTRCATCTCCTTGGAATGTCATTGCTWGGYACTTGTGCACTCTTCAACTTCCCWTCCTCCTTGTCAAATGTGACATTCTTGCTCT
Ro06-7737802	Ro06	7737802	A	G	CCTTCCGATACTTGTTGTTCTTCTTCTGTAAATCCTCCTTCCTTTGAGCTTGAGGGAATGGAAGAGGCACTTGATGAGTTGTTACATGCAAWGGAGGTAT[A/G]CTCARRTTRCATCTCCTTGGAATGTCATTGCTWGGYACTTGTGCACTCTTCAACTTCCCWTCCTCCTTGTCAAATGTGACATTCTTGCTCTTCCTCTTRY
Ro06-7737807	Ro06	7737807	G	A	CGATACTTGTTGTTCTTCTTCTGTAAATCCTCCTTCCTTTGAGCTTGAGGGAATGGAAGAGGCACTTGATGAGTTGTTACATGCAAWGGAGGTATRCTCA[G/A]RTTRCATCTCCTTGGAATGTCATTGCTWGGYACTTGTGCACTCTTCAACTTCCCWTCCTCCTTGTCAAATGTGACATTCTTGCTCTTCCTCTTRYTRTAA
Ro06-7737808	Ro06	7737808	A	G	GATACTTGTTGTTCTTCTTCTGTAAATCCTCCTTCCTTTGAGCTTGAGGGAATGGAAGAGGCACTTGATGAGTTGTTACATGCAAWGGAGGTATRCTCAR[A/G]TTRCATCTCCTTGGAATGTCATTGCTWGGYACTTGTGCACTCTTCAACTTCCCWTCCTCCTTGTCAAATGTGACATTCTTGCTCTTCCTCTTRYTRTAAT
Ro06-7737811	Ro06	7737811	A	G	ACTTGTTGTTCTTCTTCTGTAAATCCTCCTTCCTTTGAGCTTGAGGGAATGGAAGAGGCACTTGATGAGTTGTTACATGCAAWGGAGGTATRCTCARRTT[A/G]CATCTCCTTGGAATGTCATTGCTWGGYACTTGTGCACTCTTCAACTTCCCWTCCTCCTTGTCAAATGTGACATTCTTGCTCTTCCTCTTRYTRTAATCYC
Ro06-7737835	Ro06	7737835	A	T	CCTCCTTCCTTTGAGCTTGAGGGAATGGAAGAGGCACTTGATGAGTTGTTACATGCAAWGGAGGTATRCTCARRTTRCATCTCCTTGGAATGTCATTGCT[A/T]GGYACTTGTGCACTCTTCAACTTCCCWTCCTCCTTGTCAAATGTGACATTCTTGCTCTTCCTCTTRYTRTAATCYCTCTTGTCAAACTCATGATCAAGAG
Ro06-7737838	Ro06	7737838	C	T	CCTTCCTTTGAGCTTGAGGGAATGGAAGAGGCACTTGATGAGTTGTTACATGCAAWGGAGGTATRCTCARRTTRCATCTCCTTGGAATGTCATTGCTWGG[C/T]ACTTGTGCACTCTTCAACTTCCCWTCCTCCTTGTCAAATGTGACATTCTTGCTCTTCCTCTTRYTRTAATCYCTCTTGTCAAACTCATGATCAAGAGAGA
Ro06-7737862	Ro06	7737862	A	T	GAAGAGGCACTTGATGAGTTGTTACATGCAAWGGAGGTATRCTCARRTTRCATCTCCTTGGAATGTCATTGCTWGGYACTTGTGCACTCTTCAACTTCCC[A/T]TCCTCCTTGTCAAATGTGACATTCTTGCTCTTCCTCTTRYTRTAATCYCTCTTGTCAAACTCATGATCAAGAGAGAGCTGCCCAAATTCCTCCCCCAATG
Ro06-7737901	Ro06	7737901	G	A	TRCTCARRTTRCATCTCCTTGGAATGTCATTGCTWGGYACTTGTGCACTCTTCAACTTCCCWTCCTCCTTGTCAAATGTGACATTCTTGCTCTTCCTCTT[G/A]YTRTAATCYCTCTTGTCAAACTCATGATCAAGAGAGAGCTGCCCAAATTCCTCCCCCAATGGGATTCCATCTTCATGATTGAAGACACTAGTAGATGGAG
Ro06-7737902	Ro06	7737902	T	C	RCTCARRTTRCATCTCCTTGGAATGTCATTGCTWGGYACTTGTGCACTCTTCAACTTCCCWTCCTCCTTGTCAAATGTGACATTCTTGCTCTTCCTCTTR[T/C]TRTAATCYCTCTTGTCAAACTCATGATCAAGAGAGAGCTGCCCAAATTCCTCCCCCAATGGGATTCCATCTTCATGATTGAAGACACTAGTAGATGGAGG
Ro06-7737904	Ro06	7737904	A	G	TCARRTTRCATCTCCTTGGAATGTCATTGCTWGGYACTTGTGCACTCTTCAACTTCCCWTCCTCCTTGTCAAATGTGACATTCTTGCTCTTCCTCTTRYT[A/G]TAATCYCTCTTGTCAAACTCATGATCAAGAGAGAGCTGCCCAAATTCCTCCCCCAATGGGATTCCATCTTCATGATTGAAGACACTAGTAGATGGAGGCT
Ro06-7737910	Ro06	7737910	C	T	TRCATCTCCTTGGAATGTCATTGCTWGGYACTTGTGCACTCTTCAACTTCCCWTCCTCCTTGTCAAATGTGACATTCTTGCTCTTCCTCTTRYTRTAATC[C/T]CTCTTGTCAAACTCATGATCAAGAGAGAGCTGCCCAAATTCCTCCCCCAATGGGATTCCATCTTCATGATTGAAGACACTAGTAGATGGAGGCTTGGACA
Ro06-7739101	Ro06	7739101	G	T	ATCTACCTCCTTGGTAGTTGTTTCCTCCTTGATAGGTACTGCCCCCTTGATGGCCTTGGCTGTTTGTTAGGGCTGCATTCTCCACATGCCTCTTGCCATA[G/T]GAGTAATGAGGATGATTGTTGAGCTGTGAGGARTGGTGCTCCGGATTATAATTATCCACTTGGTACAATTGYTCATCCAACACTCCTTGTTGAATGGTGG
Ro06-7739134	Ro06	7739134	G	A	AGGTACTGCCCCCTTGATGGCCTTGGCTGTTTGTTAGGGCTGCATTCTCCACATGCCTCTTGCCATAKGAGTAATGAGGATGATTGTTGAGCTGTGAGGA[G/A]TGGTGCTCCGGATTATAATTATCCACTTGGTACAATTGYTCATCCAACACTCCTTGTTGAATGGTGGCTGAATAGTATTGGCACTCAATGGTTTCATGCT
Ro06-7739173	Ro06	7739173	T	C	CTGCATTCTCCACATGCCTCTTGCCATAKGAGTAATGAGGATGATTGTTGAGCTGTGAGGARTGGTGCTCCGGATTATAATTATCCACTTGGTACAATTG[T/C]TCATCCAACACTCCTTGTTGAATGGTGGCTGAATAGTATTGGCACTCAATGGTTTCATGCTCCAAAGAACCACAATAAGAGCATGAAACAGCCACTGCCT
Ro06-7739317	Ro06	7739317	C	T	ACTCAATGGTTTCATGCTCCAAAGAACCACAATAAGAGCATGAAACAGCCACTGCCTTAACTTGCTCACTTGGATGAGGAGGAGCTGCATTGCCATGTGC[C/T]TTGAGCAAGAGATCAAGCTTGGTATTCATGGCAGCCTCAAGTTGCTCAAACTTGGCATTCATTAAATCATCCACTTGTTGAATTTGGGAGACACCTTGGA
Ro06-7751252	Ro06	7751252	A	G	TTATAATCAAGAGAATAAAAATTATATACCAAGGTTAAAGAATTTGCTAAGTCTTTAACATGTACATCTCATTTATGCTCGGGTGTAGTGTGTGAAAACC[A/G]ARTATACAATTAATGTCAAGCAATCCAATAGGCACATATGAACAACATTAACCACTAAACCTCACAAGATTCACTAAATATTTCCGCTCAGTGTTTAGGG
Ro06-7751254	Ro06	7751254	A	G	ATAATCAAGAGAATAAAAATTATATACCAAGGTTAAAGAATTTGCTAAGTCTTTAACATGTACATCTCATTTATGCTCGGGTGTAGTGTGTGAAAACCRA[A/G]TATACAATTAATGTCAAGCAATCCAATAGGCACATATGAACAACATTAACCACTAAACCTCACAAGATTCACTAAATATTTCCGCTCAGTGTTTAGGGTT
Ro06-7752125	Ro06	7752125	T	C	CAAGAGGTCTCTGAGCAAGTTCTAGGTTCAAAAACTCATGAATTGTGCACACATGAAGAACAAGTAAATGTATGAATAATGCATACATGTGAATATACAA[T/C]AGGCTCAAATCCTCACATTTCTGGGTATGCATGACAATGTATGTTYAAATGTGCTTCTCGGATTGCAATCAAYTAATCGAAACAGGTTAWGTGAACATGG
Ro06-7752171	Ro06	7752171	T	C	GCACACATGAAGAACAAGTAAATGTATGAATAATGCATACATGTGAATATACAAYAGGCTCAAATCCTCACATTTCTGGGTATGCATGACAATGTATGTT[T/C]AAATGTGCTTCTCGGATTGCAATCAAYTAATCGAAACAGGTTAWGTGAACATGGAAATTCGAGCAATCACAAGTTATGTATATTAAATCCAAACCAAATT
Ro06-7752198	Ro06	7752198	C	T	GAATAATGCATACATGTGAATATACAAYAGGCTCAAATCCTCACATTTCTGGGTATGCATGACAATGTATGTTYAAATGTGCTTCTCGGATTGCAATCAA[C/T]TAATCGAAACAGGTTAWGTGAACATGGAAATTCGAGCAATCACAAGTTATGTATATTAAATCCAAACCAAATTACACAAAACCTTAGCATATAACCAACA
Ro06-7752215	Ro06	7752215	A	T	GAATATACAAYAGGCTCAAATCCTCACATTTCTGGGTATGCATGACAATGTATGTTYAAATGTGCTTCTCGGATTGCAATCAAYTAATCGAAACAGGTTA[A/T]GTGAACATGGAAATTCGAGCAATCACAAGTTATGTATATTAAATCCAAACCAAATTACACAAAACCTTAGCATATAACCAACATTTTCCAAATCATAACA
Ro06-7752830	Ro06	7752830	C	T	ATAAACACACAAACATAAATCAACAGAAGTAAACACACAACATATATACAAATGAAAAACAGATAAGTTATAGAAAATCTCCCCCTTGAAGATCGTGAAG[C/T]TCCTCCCGAAGCAAGTCACCAACAGTCACAAACAAGGCTAGCAGGGCCTTGCATCCAACGTTTGCTCCTTARTTGACTGCGGYTCTGATCCKTTGAAGTG
Ro06-7752902	Ro06	7752902	A	G	GAAAATCTCCCCCTTGAAGATCGTGAAGYTCCTCCCGAAGCAAGTCACCAACAGTCACAAACAAGGCTAGCAGGGCCTTGCATCCAACGTTTGCTCCTTA[A/G]TTGACTGCGGYTCTGATCCKTTGAAGTGTGTCCTGGACAAGGGTWGTTGCCGACTCCACGGCAGAYTTGGCTGATGTAGCCCTCACTGAGATCTGGAACA
Ro06-7752913	Ro06	7752913	C	T	CCTTGAAGATCGTGAAGYTCCTCCCGAAGCAAGTCACCAACAGTCACAAACAAGGCTAGCAGGGCCTTGCATCCAACGTTTGCTCCTTARTTGACTGCGG[C/T]TCTGATCCKTTGAAGTGTGTCCTGGACAAGGGTWGTTGCCGACTCCACGGCAGAYTTGGCTGATGTAGCCCTCACTGAGATCTGGAACACCATAGTCAGT
Ro06-7752922	Ro06	7752922	G	T	TCGTGAAGYTCCTCCCGAAGCAAGTCACCAACAGTCACAAACAAGGCTAGCAGGGCCTTGCATCCAACGTTTGCTCCTTARTTGACTGCGGYTCTGATCC[G/T]TTGAAGTGTGTCCTGGACAAGGGTWGTTGCCGACTCCACGGCAGAYTTGGCTGATGTAGCCCTCACTGAGATCTGGAACACCATAGTCAGTAGTGTTCCA
Ro06-7752947	Ro06	7752947	T	A	CACCAACAGTCACAAACAAGGCTAGCAGGGCCTTGCATCCAACGTTTGCTCCTTARTTGACTGCGGYTCTGATCCKTTGAAGTGTGTCCTGGACAAGGGT[T/A]GTTGCCGACTCCACGGCAGAYTTGGCTGATGTAGCCCTCACTGAGATCTGGAACACCATAGTCAGTAGTGTTCCATCAAGTACAGCTCCGGATACGTTTG
Ro06-7752968	Ro06	7752968	C	T	CTAGCAGGGCCTTGCATCCAACGTTTGCTCCTTARTTGACTGCGGYTCTGATCCKTTGAAGTGTGTCCTGGACAAGGGTWGTTGCCGACTCCACGGCAGA[C/T]TTGGCTGATGTAGCCCTCACTGAGATCTGGAACACCATAGTCAGTAGTGTTCCATCAAGTACAGCTCCGGATACGTTTGGCAGAATGGAGAAGCCTGAAG
Ro06-7753252	Ro06	7753252	A	T	GACCCCGTTGCATCGGTGCAACACTCCTGAAGAATAAGGAAGTCGTTGTGACTATCAATGGCGAGCACCGAGATCTGGTTCCGCGGGTCAAGACCGATGG[A/T]GAAATTTGYTAGCACACGYACMGAGCTGTCCATCGACATRCTATCCCACATTGGTCTAGTSTGAACRTCTTTGAGRAACTCAAAGATCCTGGTGTGATGG
Ro06-7753261	Ro06	7753261	C	T	GCATCGGTGCAACACTCCTGAAGAATAAGGAAGTCGTTGTGACTATCAATGGCGAGCACCGAGATCTGGTTCCGCGGGTCAAGACCGATGGWGAAATTTG[C/T]TAGCACACGYACMGAGCTGTCCATCGACATRCTATCCCACATTGGTCTAGTSTGAACRTCTTTGAGRAACTCAAAGATCCTGGTGTGATGGGAAAGATGC
Ro06-7753271	Ro06	7753271	T	C	AACACTCCTGAAGAATAAGGAAGTCGTTGTGACTATCAATGGCGAGCACCGAGATCTGGTTCCGCGGGTCAAGACCGATGGWGAAATTTGYTAGCACACG[T/C]ACMGAGCTGTCCATCGACATRCTATCCCACATTGGTCTAGTSTGAACRTCTTTGAGRAACTCAAAGATCCTGGTGTGATGGGAAAGATGCACGACAGAAC
Ro06-7753274	Ro06	7753274	A	C	ACTCCTGAAGAATAAGGAAGTCGTTGTGACTATCAATGGCGAGCACCGAGATCTGGTTCCGCGGGTCAAGACCGATGGWGAAATTTGYTAGCACACGYAC[A/C]GAGCTGTCCATCGACATRCTATCCCACATTGGTCTAGTSTGAACRTCTTTGAGRAACTCAAAGATCCTGGTGTGATGGGAAAGATGCACGACAGAACAAC
Ro06-7753292	Ro06	7753292	G	A	AGTCGTTGTGACTATCAATGGCGAGCACCGAGATCTGGTTCCGCGGGTCAAGACCGATGGWGAAATTTGYTAGCACACGYACMGAGCTGTCCATCGACAT[G/A]CTATCCCACATTGGTCTAGTSTGAACRTCTTTGAGRAACTCAAAGATCCTGGTGTGATGGGAAAGATGCACGACAGAACAACCAGCAGTACGATTGACTC
Ro06-7753313	Ro06	7753313	C	G	CGAGCACCGAGATCTGGTTCCGCGGGTCAAGACCGATGGWGAAATTTGYTAGCACACGYACMGAGCTGTCCATCGACATRCTATCCCACATTGGTCTAGT[C/G]TGAACRTCTTTGAGRAACTCAAAGATCCTGGTGTGATGGGAAAGATGCACGACAGAACAACCAGCAGTACGATTGACTCCAGGGGGCTTGCTCGGATCAC
Ro06-7753319	Ro06	7753319	G	A	CCGAGATCTGGTTCCGCGGGTCAAGACCGATGGWGAAATTTGYTAGCACACGYACMGAGCTGTCCATCGACATRCTATCCCACATTGGTCTAGTSTGAAC[G/A]TCTTTGAGRAACTCAAAGATCCTGGTGTGATGGGAAAGATGCACGACAGAACAACCAGCAGTACGATTGACTCCAGGGGGCTTGCTCGGATCACCCCTKC
Ro06-7753328	Ro06	7753328	G	A	GGTTCCGCGGGTCAAGACCGATGGWGAAATTTGYTAGCACACGYACMGAGCTGTCCATCGACATRCTATCCCACATTGGTCTAGTSTGAACRTCTTTGAG[G/A]AACTCAAAGATCCTGGTGTGATGGGAAAGATGCACGACAGAACAACCAGCAGTACGATTGACTCCAGGGGGCTTGCTCGGATCACCCCTKCGCTTGTTGG
Ro06-7753418	Ro06	7753418	G	T	CRTCTTTGAGRAACTCAAAGATCCTGGTGTGATGGGAAAGATGCACGACAGAACAACCAGCAGTACGATTGACTCCAGGGGGCTTGCTCGGATCACCCCT[G/T]CGCTTGTTGGTCCTGACCTCCATTCGAGTGTCTCTTGTTCGGTTCGAACAAGTCCAGTGGTGGTACGTGGAGTTGCTGATGTCGTTGAAGAAACAGATTG
Ro06-7753568	Ro06	7753568	A	G	AAGTCCAGTGGTGGTACGTGGAGTTGCTGATGTCGTTGAAGAAACAGATTGTCATCTGTTTTGCCATTTCCGCAAGTCCTCTTCTTCCTTCAAGAGAAAT[A/G]ATCGAGTCACCGGGTGAAGAGTGGATACCTGTGGCGCACATGTAGCGCTCGGCTTGAAGTTGGAGGGTTGAGATCCAACGTTTTGCACCAAAAGYGAACC
Ro06-7753663	Ro06	7753663	T	C	GAAATRATCGAGTCACCGGGTGAAGAGTGGATACCTGTGGCGCACATGTAGCGCTCGGCTTGAAGTTGGAGGGTTGAGATCCAACGTTTTGCACCAAAAG[T/C]GAACCCTGAATGAACAAAGGGTTCGAAACTGGCCTTCATYTCTTTCTCGCGTACATCCACGTGCTCCACCCAAGTGACTAAGGAAGATCCATTATGTAAA
Ro06-7753703	Ro06	7753703	C	T	CGCACATGTAGCGCTCGGCTTGAAGTTGGAGGGTTGAGATCCAACGTTTTGCACCAAAAGYGAACCCTGAATGAACAAAGGGTTCGAAACTGGCCTTCAT[C/T]TCTTTCTCGCGTACATCCACGTGCTCCACCCAAGTGACTAAGGAAGATCCATTATGTAAATCACGTATCAGGCATCCGGAGGGGCGTTTTCGGCAGATCG
Ro06-7753820	Ro06	7753820	T	C	CCACGTGCTCCACCCAAGTGACTAAGGAAGATCCATTATGTAAATCACGTATCAGGCATCCGGAGGGGCGTTTTCGGCAGATCGATCTCACGGAAGGCTT[T/C]GGATTGGWRCGCAATTCATCCACGGAGACATCCACGACGACCCAACTTCCATCCAGTTGYTGGTGAGAATACCGAACAAACTGGACTTCACGAGTYGARA
Ro06-7753828	Ro06	7753828	A	T	TCCACCCAAGTGACTAAGGAAGATCCATTATGTAAATCACGTATCAGGCATCCGGAGGGGCGTTTTCGGCAGATCGATCTCACGGAAGGCTTYGGATTGG[A/T]RCGCAATTCATCCACGGAGACATCCACGACGACCCAACTTCCATCCAGTTGYTGGTGAGAATACCGAACAAACTGGACTTCACGAGTYGARACGAGRTGA
Ro06-7753829	Ro06	7753829	A	G	CCACCCAAGTGACTAAGGAAGATCCATTATGTAAATCACGTATCAGGCATCCGGAGGGGCGTTTTCGGCAGATCGATCTCACGGAAGGCTTYGGATTGGW[A/G]CGCAATTCATCCACGGAGACATCCACGACGACCCAACTTCCATCCAGTTGYTGGTGAGAATACCGAACAAACTGGACTTCACGAGTYGARACGAGRTGAG
Ro06-7753880	Ro06	7753880	T	C	CGGAGGGGCGTTTTCGGCAGATCGATCTCACGGAAGGCTTYGGATTGGWRCGCAATTCATCCACGGAGACATCCACGACGACCCAACTTCCATCCAGTTG[T/C]TGGTGAGAATACCGAACAAACTGGACTTCACGAGTYGARACGAGRTGAGATGGCACTAAAAACTCTGCCGACATCACTTGCTTCTGCTCCTCGTAGCCAT
Ro06-7753916	Ro06	7753916	T	C	GCTTYGGATTGGWRCGCAATTCATCCACGGAGACATCCACGACGACCCAACTTCCATCCAGTTGYTGGTGAGAATACCGAACAAACTGGACTTCACGAGT[T/C]GARACGAGRTGAGATGGCACTAAAAACTCTGCCGACATCACTTGCTTCTGCTCCTCGTAGCCATCTTCGTTGTTGGAGGATAAGATCTCCAACGTTYGGG
Ro06-7753919	Ro06	7753919	A	G	TYGGATTGGWRCGCAATTCATCCACGGAGACATCCACGACGACCCAACTTCCATCCAGTTGYTGGTGAGAATACCGAACAAACTGGACTTCACGAGTYGA[A/G]ACGAGRTGAGATGGCACTAAAAACTCTGCCGACATCACTTGCTTCTGCTCCTCGTAGCCATCTTCGTTGTTGGAGGATAAGATCTCCAACGTTYGGGCGT
Ro06-7753925	Ro06	7753925	G	A	TGGWRCGCAATTCATCCACGGAGACATCCACGACGACCCAACTTCCATCCAGTTGYTGGTGAGAATACCGAACAAACTGGACTTCACGAGTYGARACGAG[G/A]TGAGATGGCACTAAAAACTCTGCCGACATCACTTGCTTCTGCTCCTCGTAGCCATCTTCGTTGTTGGAGGATAAGATCTCCAACGTTYGGGCGTTTGTGA
Ro06-7754013	Ro06	7754013	T	C	AGTYGARACGAGRTGAGATGGCACTAAAAACTCTGCCGACATCACTTGCTTCTGCTCCTCGTAGCCATCTTCGTTGTTGGAGGATAAGATCTCCAACGTT[T/C]GGGCGTTTGTGATCATGCTACAGAAGACTGGCAACCATCGACCAACATCCATTAARATCTGAACGATGGTGGTCGGATAAAGATGGATGGTTGCCGAGTG
Ro06-7754069	Ro06	7754069	G	A	CCTCGTAGCCATCTTCGTTGTTGGAGGATAAGATCTCCAACGTTYGGGCGTTTGTGATCATGCTACAGAAGACTGGCAACCATCGACCAACATCCATTAA[G/A]ATCTGAACGATGGTGGTCGGATAAAGATGGATGGTTGCCGAGTGTCTCGACGATTCGGCTTTGAAGTACGGWGCAGGTTCAGCTCGTTGAAACACTCGCA
Ro06-7754141	Ro06	7754141	A	T	CTGGCAACCATCGACCAACATCCATTAARATCTGAACGATGGTGGTCGGATAAAGATGGATGGTTGCCGAGTGTCTCGACGATTCGGCTTTGAAGTACGG[A/T]GCAGGTTCAGCTCGTTGAAACACTCGCAAGTACTCGGCCCTATGAAGAGTCTCGGGATGAATAGACGTGTCGGGAGTCGGTGAAGTTATCCACAAAGGAA
Ro06-7754246	Ro06	7754246	G	A	GTTCAGCTCGTTGAAACACTCGCAAGTACTCGGCCCTATGAAGAGTCTCGGGATGAATAGACGTGTCGGGAGTCGGTGAAGTTATCCACAAAGGAAATCC[G/A]GCAGTGGCCATGAGCAGGAGCTCGTGTTTGGCCTTACGGACGATATCCGAGATCAAGTCGGTGTGGACTCCGACAAGATCATGAGCAGGTGCGGGAAGGG
Ro06-7754800	Ro06	7754800	T	G	TCCTCCTCTAGTCCGATTTTCGGACCAAATCTTTCTCTTTGTGGCTTGGTGGGGTGAGAATACACCGCAAAGAAAGCTGCGAGTGCATCTCTCTGAGCCT[T/G]GGTGTATTTGTGTCTCGGAAGTCTCCTGTAGACAGGAGYGGCTTCCGGCTCAAYGGGTGGATCAGCAACCAAGATTGGTGCTTGAGGTAGTGGTTGCGGT
Ro06-7754839	Ro06	7754839	C	T	TGTGGCTTGGTGGGGTGAGAATACACCGCAAAGAAAGCTGCGAGTGCATCTCTCTGAGCCTKGGTGTATTTGTGTCTCGGAAGTCTCCTGTAGACAGGAG[C/T]GGCTTCCGGCTCAAYGGGTGGATCAGCAACCAAGATTGGTGCTTGAGGTAGTGGTTGCGGTTGTGGCTCGGTCGGCATGCTAGCATCGGCGCTATTGAGC
Ro06-7754854	Ro06	7754854	C	T	TGAGAATACACCGCAAAGAAAGCTGCGAGTGCATCTCTCTGAGCCTKGGTGTATTTGTGTCTCGGAAGTCTCCTGTAGACAGGAGYGGCTTCCGGCTCAA[C/T]GGGTGGATCAGCAACCAAGATTGGTGCTTGAGGTAGTGGTTGCGGTTGTGGCTCGGTCGGCATGCTAGCATCGGCGCTATTGAGCATGCTYGGTGGAATT
Ro06-7754945	Ro06	7754945	C	T	CCGGCTCAAYGGGTGGATCAGCAACCAAGATTGGTGCTTGAGGTAGTGGTTGCGGTTGTGGCTCGGTCGGCATGCTAGCATCGGCGCTATTGAGCATGCT[C/T]GGTGGAATTATTTCAGYCARRCCTTCAAAGATTGGGTTCTCTGAAGGACCTGCCTGAAACAARTCGCTRAAWGARTTAACTCKCTTGGCCATTTYTGGGT
Ro06-7754962	Ro06	7754962	C	T	TCAGCAACCAAGATTGGTGCTTGAGGTAGTGGTTGCGGTTGTGGCTCGGTCGGCATGCTAGCATCGGCGCTATTGAGCATGCTYGGTGGAATTATTTCAG[C/T]CARRCCTTCAAAGATTGGGTTCTCTGAAGGACCTGCCTGAAACAARTCGCTRAAWGARTTAACTCKCTTGGCCATTTYTGGGTTGGGAAGGGAGGAWAGC
Ro06-7754965	Ro06	7754965	G	A	GCAACCAAGATTGGTGCTTGAGGTAGTGGTTGCGGTTGTGGCTCGGTCGGCATGCTAGCATCGGCGCTATTGAGCATGCTYGGTGGAATTATTTCAGYCA[G/A]RCCTTCAAAGATTGGGTTCTCTGAAGGACCTGCCTGAAACAARTCGCTRAAWGARTTAACTCKCTTGGCCATTTYTGGGTTGGGAAGGGAGGAWAGCTTT
Ro06-7754966	Ro06	7754966	A	G	CAACCAAGATTGGTGCTTGAGGTAGTGGTTGCGGTTGTGGCTCGGTCGGCATGCTAGCATCGGCGCTATTGAGCATGCTYGGTGGAATTATTTCAGYCAR[A/G]CCTTCAAAGATTGGGTTCTCTGAAGGACCTGCCTGAAACAARTCGCTRAAWGARTTAACTCKCTTGGCCATTTYTGGGTTGGGAAGGGAGGAWAGCTTTT
Ro06-7755008	Ro06	7755008	A	G	CGGTCGGCATGCTAGCATCGGCGCTATTGAGCATGCTYGGTGGAATTATTTCAGYCARRCCTTCAAAGATTGGGTTCTCTGAAGGACCTGCCTGAAACAA[A/G]TCGCTRAAWGARTTAACTCKCTTGGCCATTTYTGGGTTGGGAAGGGAGGAWAGCTTTTCTGGGTTAGAGAGATTTTCTGGGAAAAAACTCAAGAACACGA
Ro06-7755014	Ro06	7755014	G	A	GCATGCTAGCATCGGCGCTATTGAGCATGCTYGGTGGAATTATTTCAGYCARRCCTTCAAAGATTGGGTTCTCTGAAGGACCTGCCTGAAACAARTCGCT[G/A]AAWGARTTAACTCKCTTGGCCATTTYTGGGTTGGGAAGGGAGGAWAGCTTTTCTGGGTTAGAGAGATTTTCTGGGAAAAAACTCAAGAACACGAAGAACA
Ro06-7755017	Ro06	7755017	A	T	TGCTAGCATCGGCGCTATTGAGCATGCTYGGTGGAATTATTTCAGYCARRCCTTCAAAGATTGGGTTCTCTGAAGGACCTGCCTGAAACAARTCGCTRAA[A/T]GARTTAACTCKCTTGGCCATTTYTGGGTTGGGAAGGGAGGAWAGCTTTTCTGGGTTAGAGAGATTTTCTGGGAAAAAACTCAAGAACACGAAGAACAACG
Ro06-7755020	Ro06	7755020	A	G	TAGCATCGGCGCTATTGAGCATGCTYGGTGGAATTATTTCAGYCARRCCTTCAAAGATTGGGTTCTCTGAAGGACCTGCCTGAAACAARTCGCTRAAWGA[A/G]TTAACTCKCTTGGCCATTTYTGGGTTGGGAAGGGAGGAWAGCTTTTCTGGGTTAGAGAGATTTTCTGGGAAAAAACTCAAGAACACGAAGAACAACGAGA
Ro06-7755028	Ro06	7755028	T	G	GCGCTATTGAGCATGCTYGGTGGAATTATTTCAGYCARRCCTTCAAAGATTGGGTTCTCTGAAGGACCTGCCTGAAACAARTCGCTRAAWGARTTAACTC[T/G]CTTGGCCATTTYTGGGTTGGGAAGGGAGGAWAGCTTTTCTGGGTTAGAGAGATTTTCTGGGAAAAAACTCAAGAACACGAAGAACAACGAGAGAAAACGA
Ro06-7755040	Ro06	7755040	C	T	ATGCTYGGTGGAATTATTTCAGYCARRCCTTCAAAGATTGGGTTCTCTGAAGGACCTGCCTGAAACAARTCGCTRAAWGARTTAACTCKCTTGGCCATTT[C/T]TGGGTTGGGAAGGGAGGAWAGCTTTTCTGGGTTAGAGAGATTTTCTGGGAAAAAACTCAAGAACACGAAGAACAACGAGAGAAAACGAGAGAGAATGAGA
Ro06-7755059	Ro06	7755059	T	A	CAGYCARRCCTTCAAAGATTGGGTTCTCTGAAGGACCTGCCTGAAACAARTCGCTRAAWGARTTAACTCKCTTGGCCATTTYTGGGTTGGGAAGGGAGGA[T/A]AGCTTTTCTGGGTTAGAGAGATTTTCTGGGAAAAAACTCAAGAACACGAAGAACAACGAGAGAAAACGAGAGAGAATGAGAGAGAGAGAGAGGGAAAAAC
Ro06-7756869	Ro06	7756869	G	T	ACAATAAATAATTACAAAAATAGTATTCACAAAAAAAAAATATTAGGTTAGGAACATTTTCAATCCCCGTCGACGGCGCCAAAAATTGGCACGCCCAAAA[G/T]GAGCRTCAATTTAAAAAAWCCCTATCGGTAGTATAGTGGTGTAAGTAGGGTGTCGTTCACAACGGAGATCAAAGGGTGTACCTAACAAAAATTGTCACAA
Ro06-7756874	Ro06	7756874	A	G	AAATAATTACAAAAATAGTATTCACAAAAAAAAAATATTAGGTTAGGAACATTTTCAATCCCCGTCGACGGCGCCAAAAATTGGCACGCCCAAAAKGAGC[A/G]TCAATTTAAAAAAWCCCTATCGGTAGTATAGTGGTGTAAGTAGGGTGTCGTTCACAACGGAGATCAAAGGGTGTACCTAACAAAAATTGTCACAAAGAAT
Ro06-7756888	Ro06	7756888	A	T	ATAGTATTCACAAAAAAAAAATATTAGGTTAGGAACATTTTCAATCCCCGTCGACGGCGCCAAAAATTGGCACGCCCAAAAKGAGCRTCAATTTAAAAAA[A/T]CCCTATCGGTAGTATAGTGGTGTAAGTAGGGTGTCGTTCACAACGGAGATCAAAGGGTGTACCTAACAAAAATTGTCACAAAGAATTAAATAAAATAAAG
Ro06-7774278	Ro06	7774278	C	A	ATATTTGTAGACTCATCCACTCATATTGCGGACTTTTGAGATTTTTATGATTTTGGTGGATGCATCGACATACTGGTCACATGTCGCTTAATTGTCTACA[C/A]GCAATGCTRCAAAACTYCWAGCACAGTTATAYGCTTAAGGACTCACCACCCAGATCGATCATCCTATTATGTCAAATATGTCTTGACAATGCTAGAGAGT
Ro06-7774287	Ro06	7774287	G	A	GACTCATCCACTCATATTGCGGACTTTTGAGATTTTTATGATTTTGGTGGATGCATCGACATACTGGTCACATGTCGCTTAATTGTCTACAMGCAATGCT[G/A]CAAAACTYCWAGCACAGTTATAYGCTTAAGGACTCACCACCCAGATCGATCATCCTATTATGTCAAATATGTCTTGACAATGCTAGAGAGTTTACATCAC
Ro06-7774295	Ro06	7774295	T	C	CACTCATATTGCGGACTTTTGAGATTTTTATGATTTTGGTGGATGCATCGACATACTGGTCACATGTCGCTTAATTGTCTACAMGCAATGCTRCAAAACT[T/C]CWAGCACAGTTATAYGCTTAAGGACTCACCACCCAGATCGATCATCCTATTATGTCAAATATGTCTTGACAATGCTAGAGAGTTTACATCACAGAAGTTT
Ro06-7774297	Ro06	7774297	T	A	CTCATATTGCGGACTTTTGAGATTTTTATGATTTTGGTGGATGCATCGACATACTGGTCACATGTCGCTTAATTGTCTACAMGCAATGCTRCAAAACTYC[T/A]AGCACAGTTATAYGCTTAAGGACTCACCACCCAGATCGATCATCCTATTATGTCAAATATGTCTTGACAATGCTAGAGAGTTTACATCACAGAAGTTTGA
Ro06-7774310	Ro06	7774310	C	T	CTTTTGAGATTTTTATGATTTTGGTGGATGCATCGACATACTGGTCACATGTCGCTTAATTGTCTACAMGCAATGCTRCAAAACTYCWAGCACAGTTATA[C/T]GCTTAAGGACTCACCACCCAGATCGATCATCCTATTATGTCAAATATGTCTTGACAATGCTAGAGAGTTTACATCACAGAAGTTTGATGATTATTGCATT
Ro06-7781206	Ro06	7781206	T	C	TGGATCAGACATATGCAGGGGAGAACCCAAGCAAACGTGACCAAGCTACCTTGACTTCAACTTCTAGCCAAAAAAGTGAGATTTGGCTATGGCATCGTCG[T/C]TTAGGACATGCATCTTTCAATAATATGAAAACATCCATGCCTTCTTTGTTCATTGGAATGCATGACCATGTTTTTCGTTGTGAAACTTGTGTTTTGGCGA
Ro06-7814887	Ro06	7814887	C	T	ATGCTCGGAATTTGTGATTCCTTTCCATTTCATTTTTGTAACCCCTCGCCTTAAGCCCCATTACAACCAATAAAATACCTTTTGATCTAAGATGTATGTG[C/T]ATGATTTTGTRGAGATWAGATTGACGTGCAAGCATATGGCGGCATTTGCATAAGTTTGTTTGAGTGGTAGTGTAGCTAACCGATAAACACTTGTGYGAAA
Ro06-7814898	Ro06	7814898	G	A	TTGTGATTCCTTTCCATTTCATTTTTGTAACCCCTCGCCTTAAGCCCCATTACAACCAATAAAATACCTTTTGATCTAAGATGTATGTGYATGATTTTGT[G/A]GAGATWAGATTGACGTGCAAGCATATGGCGGCATTTGCATAAGTTTGTTTGAGTGGTAGTGTAGCTAACCGATAAACACTTGTGYGAAAATCAGAGTGAA
Ro06-7814904	Ro06	7814904	T	A	TTCCTTTCCATTTCATTTTTGTAACCCCTCGCCTTAAGCCCCATTACAACCAATAAAATACCTTTTGATCTAAGATGTATGTGYATGATTTTGTRGAGAT[T/A]AGATTGACGTGCAAGCATATGGCGGCATTTGCATAAGTTTGTTTGAGTGGTAGTGTAGCTAACCGATAAACACTTGTGYGAAAATCAGAGTGAAATCCTG
Ro06-7814983	Ro06	7814983	T	C	TGTGYATGATTTTGTRGAGATWAGATTGACGTGCAAGCATATGGCGGCATTTGCATAAGTTTGTTTGAGTGGTAGTGTAGCTAACCGATAAACACTTGTG[T/C]GAAAATCAGAGTGAAATCCTGTGAGTTTATGGTTAACACTATTTCAATATGCATGCTTACTTTGGTGCATTGAAATGACAATACTTCACACACTTCACTT
Ro06-7832328	Ro06	7832328	G	A	CCCTACTATTTGGCTATGATTTAATTGTAACTTTGCTATTTTAGCTTAGTTTCCATATTTGAGTCCAAAATGATGTAATAATGTGAACAGGTGCAGAAAC[G/A]AAGTCTAATGGGCTTTTGCGAGGCCCATTATGAGGTGAGCTGCCGTGAGGCCCAACATGGAAGGCCCAAACCCAAGAAGGAGGCCCAAACCCAAGATGGA
Ro06-7832476	Ro06	7832476	A	T	AGGCCCAACATGGAAGGCCCAAACCCAAGAAGGAGGCCCAAACCCAAGATGGAAGGCCCAAATCCATGAAGGAAGGCTCAAGTTCACAAAGCATGAGGAA[A/T]GRCCCAAGCCCAGATTTTCGGACAWTCTGCCTGTGCAGATTAGTCAACTTCAGAAGCGCATATCTCCCAATTGCACCGTTGGATCTAGCTGTATTTTTGA
Ro06-7832478	Ro06	7832478	G	A	GCCCAACATGGAAGGCCCAAACCCAAGAAGGAGGCCCAAACCCAAGATGGAAGGCCCAAATCCATGAAGGAAGGCTCAAGTTCACAAAGCATGAGGAAWG[G/A]CCCAAGCCCAGATTTTCGGACAWTCTGCCTGTGCAGATTAGTCAACTTCAGAAGCGCATATCTCCCAATTGCACCGTTGGATCTAGCTGTATTTTTGATA
Ro06-7832501	Ro06	7832501	T	A	CAAGAAGGAGGCCCAAACCCAAGATGGAAGGCCCAAATCCATGAAGGAAGGCTCAAGTTCACAAAGCATGAGGAAWGRCCCAAGCCCAGATTTTCGGACA[T/A]TCTGCCTGTGCAGATTAGTCAACTTCAGAAGCGCATATCTCCCAATTGCACCGTTGGATCTAGCTGTATTTTTGATACACGCTGCATAGGTGTGTTAGAT
Ro06-7836204	Ro06	7836204	C	T	ATGCTCAATAGCGCTGATGCTAGCATGCCGACCGAGCCACTGCCACAACCGCAACCACTACCCCAAGCACCAATCCTGGTTGCTGATCCACCTGTTGAGC[C/T]GGAAGCCGCTCCTGTCTATAGGAGACTTCCGMGGACGAAATACACCAAAGCTCAGAGAGATGCACTCGCAGCTTTCTTTGCGGTGTATTCTCACCCCACG
Ro06-7836236	Ro06	7836236	A	C	CGAGCCACTGCCACAACCGCAACCACTACCCCAAGCACCAATCCTGGTTGCTGATCCACCTGTTGAGCYGGAAGCCGCTCCTGTCTATAGGAGACTTCCG[A/C]GGACGAAATACACCAAAGCTCAGAGAGATGCACTCGCAGCTTTCTTTGCGGTGTATTCTCACCCCACGAAACCACAACGAAAAAGATTTGGTTCAAAAAT
Ro06-7836815	Ro06	7836815	T	C	ACCTGCTCATGATCTTGTCGGAGTCCACACCGACTTGATCTCGGATATCGCCCGCAAGGCCAAAGACGAGCTCCTGCTCATGGCCACTGCCGGATTTCCT[T/C]TRTGGATWWCTTCACCGACTCCCGACACGTCTATTCATCCCGAGACTCTTMATAGGGCCGAGTACTTGCGAGTGTTTCAACGAGCTGAACCTGCWCCGTA
Ro06-7836817	Ro06	7836817	G	A	CTGCTCATGATCTTGTCGGAGTCCACACCGACTTGATCTCGGATATCGCCCGCAAGGCCAAAGACGAGCTCCTGCTCATGGCCACTGCCGGATTTCCTYT[G/A]TGGATWWCTTCACCGACTCCCGACACGTCTATTCATCCCGAGACTCTTMATAGGGCCGAGTACTTGCGAGTGTTTCAACGAGCTGAACCTGCWCCGTACT
Ro06-7836823	Ro06	7836823	A	T	ATGATCTTGTCGGAGTCCACACCGACTTGATCTCGGATATCGCCCGCAAGGCCAAAGACGAGCTCCTGCTCATGGCCACTGCCGGATTTCCTYTRTGGAT[A/T]WCTTCACCGACTCCCGACACGTCTATTCATCCCGAGACTCTTMATAGGGCCGAGTACTTGCGAGTGTTTCAACGAGCTGAACCTGCWCCGTACTTCAAAG
Ro06-7836824	Ro06	7836824	A	T	TGATCTTGTCGGAGTCCACACCGACTTGATCTCGGATATCGCCCGCAAGGCCAAAGACGAGCTCCTGCTCATGGCCACTGCCGGATTTCCTYTRTGGATW[A/T]CTTCACCGACTCCCGACACGTCTATTCATCCCGAGACTCTTMATAGGGCCGAGTACTTGCGAGTGTTTCAACGAGCTGAACCTGCWCCGTACTTCAAAGC
Ro06-7836866	Ro06	7836866	C	A	CCGCAAGGCCAAAGACGAGCTCCTGCTCATGGCCACTGCCGGATTTCCTYTRTGGATWWCTTCACCGACTCCCGACACGTCTATTCATCCCGAGACTCTT[C/A]ATAGGGCCGAGTACTTGCGAGTGTTTCAACGAGCTGAACCTGCWCCGTACTTCAAAGCCGAATCGTCGAGACACTCGGCAACCATCCATCTTTATCCGAC
Ro06-7836910	Ro06	7836910	T	A	TTCCTYTRTGGATWWCTTCACCGACTCCCGACACGTCTATTCATCCCGAGACTCTTMATAGGGCCGAGTACTTGCGAGTGTTTCAACGAGCTGAACCTGC[T/A]CCGTACTTCAAAGCCGAATCGTCGAGACACTCGGCAACCATCCATCTTTATCCGACCACCATCGTTCAAATTCTCATGGATGTTGGTCGATGGTTGCCCG
Ro06-7837190	Ro06	7837190	A	G	GCAAGTGATGTCGGCCGAGTTTCTTGTGCCATCTAACATCGTTTCAACTCGTGAAGTCCAGTTTGTTAGGTACTCCCACCTACAACTGGATGGAAGTTGG[A/G]TCGTCGTGGATGTCTCCGTGGATGAATTGCGTTCMAATCCGAAGCCTTCCGTGAGATCGATCTGCCGAAAACGCCCCTCCGGATGCCTGATACGTGATCT
Ro06-7837225	Ro06	7837225	C	A	ACATCGTTTCAACTCGTGAAGTCCAGTTTGTTAGGTACTCCCACCTACAACTGGATGGAAGTTGGRTCGTCGTGGATGTCTCCGTGGATGAATTGCGTTC[C/A]AATCCGAAGCCTTCCGTGAGATCGATCTGCCGAAAACGCCCCTCCGGATGCCTGATACGTGATCTGCATAATGGATCTTCCTTRGTCACTTGGGTGGAGC
Ro06-7837309	Ro06	7837309	A	G	TGGATGAATTGCGTTCMAATCCGAAGCCTTCCGTGAGATCGATCTGCCGAAAACGCCCCTCCGGATGCCTGATACGTGATCTGCATAATGGATCTTCCTT[A/G]GTCACTTGGGTGGAGCACGTGGATGTACGCGAGAAAGAGATGAAGCCCATTTTCGAACCCTTTGTGCATTCTGGGTTCGCTTTTGGTGCAAAACGTTGGA
Ro06-7837463	Ro06	7837463	T	A	CGAACCCTTTGTGCATTCTGGGTTCGCTTTTGGTGCAAAACGTTGGATCTCAACCCTCCAACGACAAGCCGAGCGCTACATGTGCGCCACAGGTATCCAC[T/A]CTTCACCCGRTGACTCGATYATTTCTCTTGAAGGAAGAAGAGGACTGGCGGAAATGGCAAAACAGATGACAATCTGTTTCTTCAACGAYATCAGCAACTC
Ro06-7837473	Ro06	7837473	A	G	GTGCATTCTGGGTTCGCTTTTGGTGCAAAACGTTGGATCTCAACCCTCCAACGACAAGCCGAGCGCTACATGTGCGCCACAGGTATCCACWCTTCACCCG[A/G]TGACTCGATYATTTCTCTTGAAGGAAGAAGAGGACTGGCGGAAATGGCAAAACAGATGACAATCTGTTTCTTCAACGAYATCAGCAACTCCACGTATCAY
Ro06-7837483	Ro06	7837483	T	C	GGTTCGCTTTTGGTGCAAAACGTTGGATCTCAACCCTCCAACGACAAGCCGAGCGCTACATGTGCGCCACAGGTATCCACWCTTCACCCGRTGACTCGAT[T/C]ATTTCTCTTGAAGGAAGAAGAGGACTGGCGGAAATGGCAAAACAGATGACAATCTGTTTCTTCAACGAYATCAGCAACTCCACGTATCAYCACTAGACTT
Ro06-7837552	Ro06	7837552	C	T	CAGGTATCCACWCTTCACCCGRTGACTCGATYATTTCTCTTGAAGGAAGAAGAGGACTGGCGGAAATGGCAAAACAGATGACAATCTGTTTCTTCAACGA[C/T]ATCAGCAACTCCACGTATCAYCACTAGACTTGTTCRAACCGAACAAGAGACACTCGAATGGAGGTCAGGACCAACAAGCGAAGGGGTGATCCGAGCAAGC
Ro06-7837573	Ro06	7837573	C	T	RTGACTCGATYATTTCTCTTGAAGGAAGAAGAGGACTGGCGGAAATGGCAAAACAGATGACAATCTGTTTCTTCAACGAYATCAGCAACTCCACGTATCA[C/T]CACTAGACTTGTTCRAACCGAACAAGAGACACTCGAATGGAGGTCAGGACCAACAAGCGAAGGGGTGATCCGAGCAAGCCCCCTGGAGTCAATCGTACTG
Ro06-7837588	Ro06	7837588	G	A	CTCTTGAAGGAAGAAGAGGACTGGCGGAAATGGCAAAACAGATGACAATCTGTTTCTTCAACGAYATCAGCAACTCCACGTATCAYCACTAGACTTGTTC[G/A]AACCGAACAAGAGACACTCGAATGGAGGTCAGGACCAACAAGCGAAGGGGTGATCCGAGCAAGCCCCCTGGAGTCAATCGTACTGCTGGTTGTTCCGTYG
Ro06-7837687	Ro06	7837687	C	T	CRAACCGAACAAGAGACACTCGAATGGAGGTCAGGACCAACAAGCGAAGGGGTGATCCGAGCAAGCCCCCTGGAGTCAATCGTACTGCTGGTTGTTCCGT[C/T]GTTCATCTYTCCCATCACACCAGGATCTTTGAGTTCCTCAAAGAYGTKYAGACAAGACCATWRTGGGATAGYATGTCGATGGACAGCTCRGTGCGTGTGC
Ro06-7837696	Ro06	7837696	T	C	CAAGAGACACTCGAATGGAGGTCAGGACCAACAAGCGAAGGGGTGATCCGAGCAAGCCCCCTGGAGTCAATCGTACTGCTGGTTGTTCCGTYGTTCATCT[T/C]TCCCATCACACCAGGATCTTTGAGTTCCTCAAAGAYGTKYAGACAAGACCATWRTGGGATAGYATGTCGATGGACAGCTCRGTGCGTGTGCTAGCAAAYT
Ro06-7837732	Ro06	7837732	C	T	GAAGGGGTGATCCGAGCAAGCCCCCTGGAGTCAATCGTACTGCTGGTTGTTCCGTYGTTCATCTYTCCCATCACACCAGGATCTTTGAGTTCCTCAAAGA[C/T]GTKYAGACAAGACCATWRTGGGATAGYATGTCGATGGACAGCTCRGTGCGTGTGCTAGCAAAYTTCACCATCAGTCTTGACCCGCGGAACCAGATCTCGG
Ro06-7837735	Ro06	7837735	T	G	GGGGTGATCCGAGCAAGCCCCCTGGAGTCAATCGTACTGCTGGTTGTTCCGTYGTTCATCTYTCCCATCACACCAGGATCTTTGAGTTCCTCAAAGAYGT[T/G]YAGACAAGACCATWRTGGGATAGYATGTCGATGGACAGCTCRGTGCGTGTGCTAGCAAAYTTCACCATCAGTCTTGACCCGCGGAACCAGATCTCGGTGC
Ro06-7837736	Ro06	7837736	C	T	GGGTGATCCGAGCAAGCCCCCTGGAGTCAATCGTACTGCTGGTTGTTCCGTYGTTCATCTYTCCCATCACACCAGGATCTTTGAGTTCCTCAAAGAYGTK[C/T]AGACAAGACCATWRTGGGATAGYATGTCGATGGACAGCTCRGTGCGTGTGCTAGCAAAYTTCACCATCAGTCTTGACCCGCGGAACCAGATCTCGGTGCT
Ro06-7837749	Ro06	7837749	T	A	AAGCCCCCTGGAGTCAATCGTACTGCTGGTTGTTCCGTYGTTCATCTYTCCCATCACACCAGGATCTTTGAGTTCCTCAAAGAYGTKYAGACAAGACCAT[T/A]RTGGGATAGYATGTCGATGGACAGCTCRGTGCGTGTGCTAGCAAAYTTCACCATCAGTCTTGACCCGCGGAACCAGATCTCGGTGCTCGCCATTGATAGT
Ro06-7837750	Ro06	7837750	G	A	AGCCCCCTGGAGTCAATCGTACTGCTGGTTGTTCCGTYGTTCATCTYTCCCATCACACCAGGATCTTTGAGTTCCTCAAAGAYGTKYAGACAAGACCATW[G/A]TGGGATAGYATGTCGATGGACAGCTCRGTGCGTGTGCTAGCAAAYTTCACCATCAGTCTTGACCCGCGGAACCAGATCTCGGTGCTCGCCATTGATAGTC
Ro06-7837759	Ro06	7837759	C	T	GAGTCAATCGTACTGCTGGTTGTTCCGTYGTTCATCTYTCCCATCACACCAGGATCTTTGAGTTCCTCAAAGAYGTKYAGACAAGACCATWRTGGGATAG[C/T]ATGTCGATGGACAGCTCRGTGCGTGTGCTAGCAAAYTTCACCATCAGTCTTGACCCGCGGAACCAGATCTCGGTGCTCGCCATTGATAGTCACAACGACT
Ro06-7837777	Ro06	7837777	A	G	GTTGTTCCGTYGTTCATCTYTCCCATCACACCAGGATCTTTGAGTTCCTCAAAGAYGTKYAGACAAGACCATWRTGGGATAGYATGTCGATGGACAGCTC[A/G]GTGCGTGTGCTAGCAAAYTTCACCATCAGTCTTGACCCGCGGAACCAGATCTCGGTGCTCGCCATTGATAGTCACAACGACTTCCTTATTCTTCAGGAGT
Ro06-7837795	Ro06	7837795	T	C	TYTCCCATCACACCAGGATCTTTGAGTTCCTCAAAGAYGTKYAGACAAGACCATWRTGGGATAGYATGTCGATGGACAGCTCRGTGCGTGTGCTAGCAAA[T/C]TTCACCATCAGTCTTGACCCGCGGAACCAGATCTCGGTGCTCGCCATTGATAGTCACAACGACTTCCTTATTCTTCAGGAGTGTTGCACCGATGCAACAG
Ro06-7838810	Ro06	7838810	C	T	TGAGTTTAATTGTTATGATTTTGAGAATGTTTATTATATGCTAAGGCTTTGTGTGATTTGCTTCGGATTTAATATGCATAACTTGTGATTGCTCGAATTT[C/T]CWTGTTCACWTAACCTGTTTCGATTAATTGATTGCAATCCGAGAAGCACATTTGAACATACATTGTCATGCATACCCAGAAAATGTGAGGACTTGAGCCT
Ro06-7838812	Ro06	7838812	A	T	AGTTTAATTGTTATGATTTTGAGAATGTTTATTATATGCTAAGGCTTTGTGTGATTTGCTTCGGATTTAATATGCATAACTTGTGATTGCTCGAATTTYC[A/T]TGTTCACWTAACCTGTTTCGATTAATTGATTGCAATCCGAGAAGCACATTTGAACATACATTGTCATGCATACCCAGAAAATGTGAGGACTTGAGCCTRT
Ro06-7838820	Ro06	7838820	T	A	TGTTATGATTTTGAGAATGTTTATTATATGCTAAGGCTTTGTGTGATTTGCTTCGGATTTAATATGCATAACTTGTGATTGCTCGAATTTYCWTGTTCAC[T/A]TAACCTGTTTCGATTAATTGATTGCAATCCGAGAAGCACATTTGAACATACATTGTCATGCATACCCAGAAAATGTGAGGACTTGAGCCTRTTGWATATT
Ro06-7838911	Ro06	7838911	A	G	CWTGTTCACWTAACCTGTTTCGATTAATTGATTGCAATCCGAGAAGCACATTTGAACATACATTGTCATGCATACCCAGAAAATGTGAGGACTTGAGCCT[A/G]TTGWATATTCACATGTATGCATTTTTCATACATTTACTCGTTCTTCATGTGTGCACAATTCATGAGTTTTTGAACCTAGAACTTGCTCAGAGACCACTTG
Ro06-7838915	Ro06	7838915	T	A	TTCACWTAACCTGTTTCGATTAATTGATTGCAATCCGAGAAGCACATTTGAACATACATTGTCATGCATACCCAGAAAATGTGAGGACTTGAGCCTRTTG[T/A]ATATTCACATGTATGCATTTTTCATACATTTACTCGTTCTTCATGTGTGCACAATTCATGAGTTTTTGAACCTAGAACTTGCTCAGAGACCACTTGAAAC
Ro06-7888014	Ro06	7888014	T	G	TTATTGTGCATGACTTTATTTCATTACTTGTCAAAGTCTTACAATAACTTACTTGGTTATGCTATTAACCTTATGTTGATGATCTTGCTTAGTACATGAG[T/G]TCATTTACTTATGTTTTGTRTTTATGAACATATGWATATCYTGTTTTAYATATGCCYCATTTTATATGTGTTTTACTTGCACTTGATTATMTACTAATMT
Ro06-7888034	Ro06	7888034	G	A	TCATTACTTGTCAAAGTCTTACAATAACTTACTTGGTTATGCTATTAACCTTATGTTGATGATCTTGCTTAGTACATGAGKTCATTTACTTATGTTTTGT[G/A]TTTATGAACATATGWATATCYTGTTTTAYATATGCCYCATTTTATATGTGTTTTACTTGCACTTGATTATMTACTAATMTTATATTGGTGCATGRTCTTG
Ro06-7888049	Ro06	7888049	T	A	GTCTTACAATAACTTACTTGGTTATGCTATTAACCTTATGTTGATGATCTTGCTTAGTACATGAGKTCATTTACTTATGTTTTGTRTTTATGAACATATG[T/A]ATATCYTGTTTTAYATATGCCYCATTTTATATGTGTTTTACTTGCACTTGATTATMTACTAATMTTATATTGGTGCATGRTCTTGYTTACTAAGTGAATA
Ro06-7888055	Ro06	7888055	C	T	CAATAACTTACTTGGTTATGCTATTAACCTTATGTTGATGATCTTGCTTAGTACATGAGKTCATTTACTTATGTTTTGTRTTTATGAACATATGWATATC[C/T]TGTTTTAYATATGCCYCATTTTATATGTGTTTTACTTGCACTTGATTATMTACTAATMTTATATTGGTGCATGRTCTTGYTTACTAAGTGAATACATCAA
Ro06-7888063	Ro06	7888063	C	T	TACTTGGTTATGCTATTAACCTTATGTTGATGATCTTGCTTAGTACATGAGKTCATTTACTTATGTTTTGTRTTTATGAACATATGWATATCYTGTTTTA[C/T]ATATGCCYCATTTTATATGTGTTTTACTTGCACTTGATTATMTACTAATMTTATATTGGTGCATGRTCTTGYTTACTAAGTGAATACATCAACTTARTAT
Ro06-7888071	Ro06	7888071	T	C	TATGCTATTAACCTTATGTTGATGATCTTGCTTAGTACATGAGKTCATTTACTTATGTTTTGTRTTTATGAACATATGWATATCYTGTTTTAYATATGCC[T/C]CATTTTATATGTGTTTTACTTGCACTTGATTATMTACTAATMTTATATTGGTGCATGRTCTTGYTTACTAAGTGAATACATCAACTTARTATTATACATG
Ro06-7888105	Ro06	7888105	C	A	GTACATGAGKTCATTTACTTATGTTTTGTRTTTATGAACATATGWATATCYTGTTTTAYATATGCCYCATTTTATATGTGTTTTACTTGCACTTGATTAT[C/A]TACTAATMTTATATTGGTGCATGRTCTTGYTTACTAAGTGAATACATCAACTTARTATTATACATGTATGTTAACATGTATGGAAGTATATATTGTTTAG
Ro06-7888113	Ro06	7888113	C	A	GKTCATTTACTTATGTTTTGTRTTTATGAACATATGWATATCYTGTTTTAYATATGCCYCATTTTATATGTGTTTTACTTGCACTTGATTATMTACTAAT[C/A]TTATATTGGTGCATGRTCTTGYTTACTAAGTGAATACATCAACTTARTATTATACATGTATGTTAACATGTATGGAAGTATATATTGTTTAGAGTGTCTT
Ro06-7888129	Ro06	7888129	A	G	TTTGTRTTTATGAACATATGWATATCYTGTTTTAYATATGCCYCATTTTATATGTGTTTTACTTGCACTTGATTATMTACTAATMTTATATTGGTGCATG[A/G]TCTTGYTTACTAAGTGAATACATCAACTTARTATTATACATGTATGTTAACATGTATGGAAGTATATATTGTTTAGAGTGTCTTTGAAATATCACATGCA
Ro06-7888135	Ro06	7888135	T	C	TTTATGAACATATGWATATCYTGTTTTAYATATGCCYCATTTTATATGTGTTTTACTTGCACTTGATTATMTACTAATMTTATATTGGTGCATGRTCTTG[T/C]TTACTAAGTGAATACATCAACTTARTATTATACATGTATGTTAACATGTATGGAAGTATATATTGTTTAGAGTGTCTTTGAAATATCACATGCATGCTTA
Ro06-7888160	Ro06	7888160	G	A	TTAYATATGCCYCATTTTATATGTGTTTTACTTGCACTTGATTATMTACTAATMTTATATTGGTGCATGRTCTTGYTTACTAAGTGAATACATCAACTTA[G/A]TATTATACATGTATGTTAACATGTATGGAAGTATATATTGTTTAGAGTGTCTTTGAAATATCACATGCATGCTTACCTAGGTAATTAACTTGATTATGTG
Ro06-7925997	Ro06	7925997	A	G	ATTCCAGGGGCGTTGGAAAGTACACTCAAAGAGCTTTAGTTTGGCCACTGGAAACTCAGAAATAGCCTTCCGGACATGCAATGAAGAACCGGTCAAAGTG[A/G]CCCTCTAGAAAGTCMAACTGCAACGAGYACTCCTCTTTAAACCAATATTGCGATAGATCCAACGGTCTGTTTAGAGAGAAATTTAAACCGAGCACAGAAG
Ro06-7926012	Ro06	7926012	A	C	GAAAGTACACTCAAAGAGCTTTAGTTTGGCCACTGGAAACTCAGAAATAGCCTTCCGGACATGCAATGAAGAACCGGTCAAAGTGRCCCTCTAGAAAGTC[A/C]AACTGCAACGAGYACTCCTCTTTAAACCAATATTGCGATAGATCCAACGGTCTGTTTAGAGAGAAATTTAAACCGAGCACAGAAGACTCATAGACGAAGC
Ro06-7926025	Ro06	7926025	C	T	AAGAGCTTTAGTTTGGCCACTGGAAACTCAGAAATAGCCTTCCGGACATGCAATGAAGAACCGGTCAAAGTGRCCCTCTAGAAAGTCMAACTGCAACGAG[C/T]ACTCCTCTTTAAACCAATATTGCGATAGATCCAACGGTCTGTTTAGAGAGAAATTTAAACCGAGCACAGAAGACTCATAGACGAAGCGTTCCCAACTTGT
Ro06-8005701	Ro06	8005701	G	A	ATGAGTTCACAATACTACTTAAAAGAAAACCACATGAAACTAAGAGAATCCGAAAGTAGCCACCACACTAAGATCCATCACTAGGCCCGCCTTGCTCCTC[G/A]TTGCCGCCTCCTTGAGTGCCTCCTTGAGTGCCTCCTCCACTCCCACTAGCGCCACCRCTTCTTTGCCAAAATGAAAGCTGCTCAAACATGTCACACATGT
Ro06-8005758	Ro06	8005758	G	A	AGCCACCACACTAAGATCCATCACTAGGCCCGCCTTGCTCCTCRTTGCCGCCTCCTTGAGTGCCTCCTTGAGTGCCTCCTCCACTCCCACTAGCGCCACC[G/A]CTTCTTTGCCAAAATGAAAGCTGCTCAAACATGTCACACATGTGAGTGTACTGAGCGGTGGTGGCATCGAAGCGCTCATTAATGTGCCCAAATTGRGTAT
Ro06-8005854	Ro06	8005854	G	A	CACCRCTTCTTTGCCAAAATGAAAGCTGCTCAAACATGTCACACATGTGAGTGTACTGAGCGGTGGTGGCATCGAAGCGCTCATTAATGTGCCCAAATTG[G/A]GTATYCATCRAATCCAAGCGGTTATGGATTTGTTGGAACCCCATGTCCATGTGKTGAGTGGTTTGGGTATGGAAGTGCTGAAATAAGCCCACCATTTGGG
Ro06-8005859	Ro06	8005859	C	T	CTTCTTTGCCAAAATGAAAGCTGCTCAAACATGTCACACATGTGAGTGTACTGAGCGGTGGTGGCATCGAAGCGCTCATTAATGTGCCCAAATTGRGTAT[C/T]CATCRAATCCAAGCGGTTATGGATTTGTTGGAACCCCATGTCCATGTGKTGAGTGGTTTGGGTATGGAAGTGCTGAAATAAGCCCACCATTTGGGGGTCA
Ro06-8005864	Ro06	8005864	A	G	TTGCCAAAATGAAAGCTGCTCAAACATGTCACACATGTGAGTGTACTGAGCGGTGGTGGCATCGAAGCGCTCATTAATGTGCCCAAATTGRGTATYCATC[A/G]AATCCAAGCGGTTATGGATTTGTTGGAACCCCATGTCCATGTGKTGAGTGGTTTGGGTATGGAAGTGCTGAAATAAGCCCACCATTTGGGGGTCACAACC
Ro06-8005908	Ro06	8005908	G	T	ACTGAGCGGTGGTGGCATCGAAGCGCTCATTAATGTGCCCAAATTGRGTATYCATCRAATCCAAGCGGTTATGGATTTGTTGGAACCCCATGTCCATGTG[G/T]TGAGTGGTTTGGGTATGGAAGTGCTGAAATAAGCCCACCATTTGGGGGTCACAACCCGAGAGATCAAAGGTAGGAGGGGGAGGGTATGAGGTAGATGATG
Ro06-8010314	Ro06	8010314	A	C	TGAGTTTTTCCTTCCTTTGGCCCAAAACGGCGCCCATTGCATAATCCGATGCATCACACATCAACTCGAAGGGGAGTGTCCAATCCGGCGCACAAATGAT[A/C]GGTGCGGTGGTCAAAAGTGTCTTAATCATTGTGAAAGCCTCCAAACAAGCATCATCGAAATTCCAAGGAGCATCCTTGGCAAGAAGATCACAAAGAGGCT
Ro06-8060635	Ro06	8060635	C	T	TATTGGCTTCAAAATACTCCTTGGTAAAATGGTTGATGACCACAACAGTCCACACAGTAAGTTTAAAACGTGGATCAAAAATTACACTGCATCTCCATTT[C/T]CATATGTACCATAATCCCACAGCAAAGAAACAGCCCCAAGGTATGTYATATTGCAGTTTCRTTGTCGACTTCAGRTTGATGAGCAACCAATCATAGAAAG
Ro06-8060682	Ro06	8060682	C	T	GTCCACACAGTAAGTTTAAAACGTGGATCAAAAATTACACTGCATCTCCATTTYCATATGTACCATAATCCCACAGCAAAGAAACAGCCCCAAGGTATGT[C/T]ATATTGCAGTTTCRTTGTCGACTTCAGRTTGATGAGCAACCAATCATAGAAAGGTAGAGAGAAAGTAGAAGGAAACTCACATGTGTGTTGGGTGGCAGTA
Ro06-8060696	Ro06	8060696	A	G	TTTAAAACGTGGATCAAAAATTACACTGCATCTCCATTTYCATATGTACCATAATCCCACAGCAAAGAAACAGCCCCAAGGTATGTYATATTGCAGTTTC[A/G]TTGTCGACTTCAGRTTGATGAGCAACCAATCATAGAAAGGTAGAGAGAAAGTAGAAGGAAACTCACATGTGTGTTGGGTGGCAGTAAATGGTGATAGAGG
Ro06-8060710	Ro06	8060710	A	G	CAAAAATTACACTGCATCTCCATTTYCATATGTACCATAATCCCACAGCAAAGAAACAGCCCCAAGGTATGTYATATTGCAGTTTCRTTGTCGACTTCAG[A/G]TTGATGAGCAACCAATCATAGAAAGGTAGAGAGAAAGTAGAAGGAAACTCACATGTGTGTTGGGTGGCAGTAAATGGTGATAGAGGTATTGCAACCTTTA
Ro06-8095768	Ro06	8095768	C	T	TTTCTCCAACCATAGTCCTCAACGAGCTCGGGATGTTGTAAACAAGAGACATAAGATCACAAATCAAGGCTTCACAAATTTGCTAAGAATTTAACAAGCG[C/T]AATTCAATCATGCTCGGTGAAGTGTGTGGAAACCAATRTACAATCCATCTCATGCAATCAAATAGGCACACTAAACACRTTAACCACGACTCTCGCAAAG
Ro06-8095806	Ro06	8095806	G	A	TAAACAAGAGACATAAGATCACAAATCAAGGCTTCACAAATTTGCTAAGAATTTAACAAGCGYAATTCAATCATGCTCGGTGAAGTGTGTGGAAACCAAT[G/A]TACAATCCATCTCATGCAATCAAATAGGCACACTAAACACRTTAACCACGACTCTCGCAAAGATCACTAAGTATTTCCGCTCAAGTGTATAGGGTCAAAG
Ro06-8095847	Ro06	8095847	A	G	TTGCTAAGAATTTAACAAGCGYAATTCAATCATGCTCGGTGAAGTGTGTGGAAACCAATRTACAATCCATCTCATGCAATCAAATAGGCACACTAAACAC[A/G]TTAACCACGACTCTCGCAAAGATCACTAAGTATTTCCGCTCAAGTGTATAGGGTCAAAGTGTTTACTCTCATAACAAATGCACAAAGAATGTTCCCATAT
Ro06-8097268	Ro06	8097268	A	C	AAAAATTCGAAAAATTTGAAACATTTTGGCCAAAACGAACCCAATCTCACCCCCACACTTAAACTGAACATTGTCCCCAATGTGATAAGTGAATTAAACA[A/C]TAAACTTTGGGTGAGAAATATGGCAAACAACACAATCACACAAAACAAACAAGAATGAAAACAAACAAAGATAGAAATACTCCCCTTCGAAGTGCATGCT
Ro06-8097726	Ro06	8097726	T	C	GAGAAGCGTGGGAGTGAAACATGGTGGCCAAAAACATGCCACCTTCTTCTTCTTCTTTTTCTTGTTGGTGCTGCCAACAACTTTCTTCTTCTTTGAAGCT[T/C]TTCTTGGTRCCGTCTTTGCATCACTWGATGGAGGATGCAGCTTCACATACTCATCGATACATTGTAGCTGGGAGAGTTTACTCTCATCAATTTCTGGGGG
Ro06-8097735	Ro06	8097735	A	G	GGGAGTGAAACATGGTGGCCAAAAACATGCCACCTTCTTCTTCTTCTTTTTCTTGTTGGTGCTGCCAACAACTTTCTTCTTCTTTGAAGCTYTTCTTGGT[A/G]CCGTCTTTGCATCACTWGATGGAGGATGCAGCTTCACATACTCATCGATACATTGTAGCTGGGAGAGTTTACTCTCATCAATTTCTGGGGGTTCACACTT
Ro06-8097752	Ro06	8097752	T	A	GCCAAAAACATGCCACCTTCTTCTTCTTCTTTTTCTTGTTGGTGCTGCCAACAACTTTCTTCTTCTTTGAAGCTYTTCTTGGTRCCGTCTTTGCATCACT[T/A]GATGGAGGATGCAGCTTCACATACTCATCGATACATTGTAGCTGGGAGAGTTTACTCTCATCAATTTCTGGGGGTTCACACTTGTCTATCCGAAAACAAT
Ro06-8099751	Ro06	8099751	C	T	GCTTGCCTCCTGAGCATACATAGGATTAGGAGCTCCTCTTTGATAGGTGTTAGGGCCTTGAAACCCTTGTGCTCTCCCTCCTTGATAAGATTGGTTTCCT[C/T]CTTGAAACCTTYCTCCAACAAATCTACCTCCTTGGTAGTTGTTTCCTCCTTGATAGGTACTGCCCCTTGATGGCCTTGGCTGTTGGTTAGRGCTGCATTC
Ro06-8099763	Ro06	8099763	C	T	AGCATACATAGGATTAGGAGCTCCTCTTTGATAGGTGTTAGGGCCTTGAAACCCTTGTGCTCTCCCTCCTTGATAAGATTGGTTTCCTYCTTGAAACCTT[C/T]CTCCAACAAATCTACCTCCTTGGTAGTTGTTTCCTCCTTGATAGGTACTGCCCCTTGATGGCCTTGGCTGTTGGTTAGRGCTGCATTCTCMACATGCCTC
Ro06-8099842	Ro06	8099842	G	A	TGGTTTCCTYCTTGAAACCTTYCTCCAACAAATCTACCTCCTTGGTAGTTGTTTCCTCCTTGATAGGTACTGCCCCTTGATGGCCTTGGCTGTTGGTTAG[G/A]GCTGCATTCTCMACATGCCTCTTGCCATAGGAGTAGTGAGGATGATTGTTCAGCTGTGAGGAGTGGTGCTCCGGATTATAATTATCCACTTGGTACAATT
Ro06-8099854	Ro06	8099854	C	A	TGAAACCTTYCTCCAACAAATCTACCTCCTTGGTAGTTGTTTCCTCCTTGATAGGTACTGCCCCTTGATGGCCTTGGCTGTTGGTTAGRGCTGCATTCTC[C/A]ACATGCCTCTTGCCATAGGAGTAGTGAGGATGATTGTTCAGCTGTGAGGAGTGGTGCTCCGGATTATAATTATCCACTTGGTACAATTGCTCATCCAACA
Ro06-8137452	Ro06	8137452	C	G	GTTGTAGAGAGGAATTCAGTAGGAAGGCCAAAAACTTGCAAGCTGCATGACCTTATCCGAGAGATTACTGTGTCAATATCAAAGAAGGAAAAGTTTTGTG[C/G]TTCATGTCATGGGAAAGAACTCAAAGAAGTAATGAAAGAAAATGGAGCCCGCCGGTTGTCAATTCAAATAACTGAAGGTGAAATTGAATCATACACGGGT
Ro06-8147256	Ro06	8147256	C	A	AGGATGATCTCGTGGTGAAGTTTGCTTCTGGAGTCTCCAATGTCACAGCGTTGGCATCGGCCATTTCCTACCCAACAATTGCAGCTGTACCACATATGTT[C/A]CTCAATGCCTACAAAAATGTGTTGGCAGTTGCTCTTGCTACTGAGTATTCCTTCCCTCAAGCAGACAAGGTCAAGGAGTATCTGGTGCATGCAGAAGCCC
Ro06-8156419	Ro06	8156419	T	C	TATCCGTTAATCAATTCAATGAATAGATTGTGGAAAGTAATTCGAAGGTCTCAGGAAGAAGATGATGAAGAGATGATGGCAACAAACGCTGTTGTGGCTG[T/C]TGAAGTTGAAAACTAACCTCGACRCMRCRGTTCTYGTCCAGGCCGTGCACCAAACGCGGAGAGATTGCRAGAAGAACGAGGCAAAGGCATGTTGCATGAT
Ro06-8156443	Ro06	8156443	G	A	AGATTGTGGAAAGTAATTCGAAGGTCTCAGGAAGAAGATGATGAAGAGATGATGGCAACAAACGCTGTTGTGGCTGYTGAAGTTGAAAACTAACCTCGAC[G/A]CMRCRGTTCTYGTCCAGGCCGTGCACCAAACGCGGAGAGATTGCRAGAAGAACGAGGCAAAGGCATGTTGCATGATTACTTTGTTGAACGTACAGTGTTC
Ro06-8156445	Ro06	8156445	C	A	ATTGTGGAAAGTAATTCGAAGGTCTCAGGAAGAAGATGATGAAGAGATGATGGCAACAAACGCTGTTGTGGCTGYTGAAGTTGAAAACTAACCTCGACRC[C/A]RCRGTTCTYGTCCAGGCCGTGCACCAAACGCGGAGAGATTGCRAGAAGAACGAGGCAAAGGCATGTTGCATGATTACTTTGTTGAACGTACAGTGTTCAA
Ro06-8156446	Ro06	8156446	G	A	TTGTGGAAAGTAATTCGAAGGTCTCAGGAAGAAGATGATGAAGAGATGATGGCAACAAACGCTGTTGTGGCTGYTGAAGTTGAAAACTAACCTCGACRCM[G/A]CRGTTCTYGTCCAGGCCGTGCACCAAACGCGGAGAGATTGCRAGAAGAACGAGGCAAAGGCATGTTGCATGATTACTTTGTTGAACGTACAGTGTTCAAC
Ro06-8156448	Ro06	8156448	G	A	GTGGAAAGTAATTCGAAGGTCTCAGGAAGAAGATGATGAAGAGATGATGGCAACAAACGCTGTTGTGGCTGYTGAAGTTGAAAACTAACCTCGACRCMRC[G/A]GTTCTYGTCCAGGCCGTGCACCAAACGCGGAGAGATTGCRAGAAGAACGAGGCAAAGGCATGTTGCATGATTACTTTGTTGAACGTACAGTGTTCAACCA
Ro06-8156454	Ro06	8156454	C	T	AGTAATTCGAAGGTCTCAGGAAGAAGATGATGAAGAGATGATGGCAACAAACGCTGTTGTGGCTGYTGAAGTTGAAAACTAACCTCGACRCMRCRGTTCT[C/T]GTCCAGGCCGTGCACCAAACGCGGAGAGATTGCRAGAAGAACGAGGCAAAGGCATGTTGCATGATTACTTTGTTGAACGTACAGTGTTCAACCAAGCTGA
Ro06-8156488	Ro06	8156488	A	G	GAGATGATGGCAACAAACGCTGTTGTGGCTGYTGAAGTTGAAAACTAACCTCGACRCMRCRGTTCTYGTCCAGGCCGTGCACCAAACGCGGAGAGATTGC[A/G]AGAAGAACGAGGCAAAGGCATGTTGCATGATTACTTTGTTGAACGTACAGTGTTCAACCAAGCTGAATTCCGAACAGGCTACAGGATGAGTCTCCCACTC
Ro06-8192406	Ro06	8192406	T	C	CGGCATAATTTCGATGATAAAATTTAAGTGATCGATCACTTTCTCCACTTGCTTTAGAGATAGCTAGCTAGCATAAAGTGCAGCTAGCTTAATTTGAATT[T/C]CCCACACCACTCAACACTTGATGGATCATTACTCCTAGCCTTGGCATAATTTGCATGGTAGACCATGTCTTACGTGAATGTATATGTACGTATGTTCTGT
Ro06-8207401	Ro06	8207401	G	A	AAGGCCTGGATGAAATAATTCCACCGAGCATGATCAGTAGCGCCGATGCTATCATGCCGACCGAGCCACAACCGCAACCACTACCCCAAGCACCAATTCT[G/A]GTTGCTGATCCACCTGCYGAGCYGGAAGCCGCTCCTGTCTATAGGAGACTTCCGAGGWCGAARTACACCAAGGCTCAGAGAGATGCGTTGGCGGCTTTCT
Ro06-8207419	Ro06	8207419	C	T	TTCCACCGAGCATGATCAGTAGCGCCGATGCTATCATGCCGACCGAGCCACAACCGCAACCACTACCCCAAGCACCAATTCTRGTTGCTGATCCACCTGC[C/T]GAGCYGGAAGCCGCTCCTGTCTATAGGAGACTTCCGAGGWCGAARTACACCAAGGCTCAGAGAGATGCGTTGGCGGCTTTCTTTGCGGTGTATGCTCACC
Ro06-8207424	Ro06	8207424	C	T	CCGAGCATGATCAGTAGCGCCGATGCTATCATGCCGACCGAGCCACAACCGCAACCACTACCCCAAGCACCAATTCTRGTTGCTGATCCACCTGCYGAGC[C/T]GGAAGCCGCTCCTGTCTATAGGAGACTTCCGAGGWCGAARTACACCAAGGCTCAGAGAGATGCGTTGGCGGCTTTCTTTGCGGTGTATGCTCACCCCACC
Ro06-8207459	Ro06	8207459	A	T	GACCGAGCCACAACCGCAACCACTACCCCAAGCACCAATTCTRGTTGCTGATCCACCTGCYGAGCYGGAAGCCGCTCCTGTCTATAGGAGACTTCCGAGG[A/T]CGAARTACACCAAGGCTCAGAGAGATGCGTTGGCGGCTTTCTTTGCGGTGTATGCTCACCCCACCAAACCACAACGACAAAGATTTGGTCCAAAAATCGG
Ro06-8207464	Ro06	8207464	A	G	AGCCACAACCGCAACCACTACCCCAAGCACCAATTCTRGTTGCTGATCCACCTGCYGAGCYGGAAGCCGCTCCTGTCTATAGGAGACTTCCGAGGWCGAA[A/G]TACACCAAGGCTCAGAGAGATGCGTTGGCGGCTTTCTTTGCGGTGTATGCTCACCCCACCAAACCACAACGACAAAGATTTGGTCCAAAAATCGGACTAG
Ro06-8208109	Ro06	8208109	G	C	TGCTCATGGCCACTGCCGGTTTTCCTTTGTGGATATCATCACCGACTCCCGACACTTCTATTCATCCCGAGACTCTAAATAGGGCCGAGTACTTGCGAGT[G/C]TTTCAACGTGGCGAGCCTGCGCCATACTTCAAATCGGAATCCTCGAGACACTCGGCAACCATTCACCTTCATCCGACCACCATTGTTGAGATTTTAATGG
Ro06-8208241	Ro06	8208241	C	T	AATCGGAATCCTCGAGACACTCGGCAACCATTCACCTTCATCCGACCACCATTGTTGAGATTTTAATGGATGTTGGTCGATGGTTGCCCGTCTTCTGTAG[C/T]ATGGTCACAAACGCTCAGACGTTGGAGATCCTACCCTCCGACAACGCAGAAGGCTACAAGGACCAGAAGCAAGTGATGTCGGCCGAGTTTCTGGTGCCAT
Ro06-8208941	Ro06	8208941	T	C	GACCAACAAGCGAAGGGGAGATCCGAGCAAGCCCCCTGGAGTCAATCGTACTGCTGGTTGTTCTTTCCCATCACACCAGGATCTTTGAGTTCCTCAAAGA[T/C]GTGCAKACRAGRCCRCWGTGGSATAGTATGTCGATGGACAGCTCGGTGCGTGTGCTAGCRAATTTCWCCATCGGTCTTGACCCGCGGAACCAGATTTCGG
Ro06-8208947	Ro06	8208947	T	G	CAAGCGAAGGGGAGATCCGAGCAAGCCCCCTGGAGTCAATCGTACTGCTGGTTGTTCTTTCCCATCACACCAGGATCTTTGAGTTCCTCAAAGAYGTGCA[T/G]ACRAGRCCRCWGTGGSATAGTATGTCGATGGACAGCTCGGTGCGTGTGCTAGCRAATTTCWCCATCGGTCTTGACCCGCGGAACCAGATTTCGGTGCTCG
Ro06-8208950	Ro06	8208950	G	A	GCGAAGGGGAGATCCGAGCAAGCCCCCTGGAGTCAATCGTACTGCTGGTTGTTCTTTCCCATCACACCAGGATCTTTGAGTTCCTCAAAGAYGTGCAKAC[G/A]AGRCCRCWGTGGSATAGTATGTCGATGGACAGCTCGGTGCGTGTGCTAGCRAATTTCWCCATCGGTCTTGACCCGCGGAACCAGATTTCGGTGCTCGCCA
Ro06-8208953	Ro06	8208953	A	G	AAGGGGAGATCCGAGCAAGCCCCCTGGAGTCAATCGTACTGCTGGTTGTTCTTTCCCATCACACCAGGATCTTTGAGTTCCTCAAAGAYGTGCAKACRAG[A/G]CCRCWGTGGSATAGTATGTCGATGGACAGCTCGGTGCGTGTGCTAGCRAATTTCWCCATCGGTCTTGACCCGCGGAACCAGATTTCGGTGCTCGCCATAG
Ro06-8208956	Ro06	8208956	G	A	GGGAGATCCGAGCAAGCCCCCTGGAGTCAATCGTACTGCTGGTTGTTCTTTCCCATCACACCAGGATCTTTGAGTTCCTCAAAGAYGTGCAKACRAGRCC[G/A]CWGTGGSATAGTATGTCGATGGACAGCTCGGTGCGTGTGCTAGCRAATTTCWCCATCGGTCTTGACCCGCGGAACCAGATTTCGGTGCTCGCCATAGATA
Ro06-8208958	Ro06	8208958	T	A	GAGATCCGAGCAAGCCCCCTGGAGTCAATCGTACTGCTGGTTGTTCTTTCCCATCACACCAGGATCTTTGAGTTCCTCAAAGAYGTGCAKACRAGRCCRC[T/A]GTGGSATAGTATGTCGATGGACAGCTCGGTGCGTGTGCTAGCRAATTTCWCCATCGGTCTTGACCCGCGGAACCAGATTTCGGTGCTCGCCATAGATAAT
Ro06-8208963	Ro06	8208963	G	C	CCGAGCAAGCCCCCTGGAGTCAATCGTACTGCTGGTTGTTCTTTCCCATCACACCAGGATCTTTGAGTTCCTCAAAGAYGTGCAKACRAGRCCRCWGTGG[G/C]ATAGTATGTCGATGGACAGCTCGGTGCGTGTGCTAGCRAATTTCWCCATCGGTCTTGACCCGCGGAACCAGATTTCGGTGCTCGCCATAGATAATCACAA
Ro06-8209001	Ro06	8209001	A	G	TTCTTTCCCATCACACCAGGATCTTTGAGTTCCTCAAAGAYGTGCAKACRAGRCCRCWGTGGSATAGTATGTCGATGGACAGCTCGGTGCGTGTGCTAGC[A/G]AATTTCWCCATCGGTCTTGACCCGCGGAACCAGATTTCGGTGCTCGCCATAGATAATCACAACGACTTCCTCATTCTTCAGGAGTGTTGCACCGATGCAA
Ro06-8209008	Ro06	8209008	A	T	CCATCACACCAGGATCTTTGAGTTCCTCAAAGAYGTGCAKACRAGRCCRCWGTGGSATAGTATGTCGATGGACAGCTCGGTGCGTGTGCTAGCRAATTTC[A/T]CCATCGGTCTTGACCCGCGGAACCAGATTTCGGTGCTCGCCATAGATAATCACAACGACTTCCTCATTCTTCAGGAGTGTTGCACCGATGCAACGGGGTC
Ro06-8215190	Ro06	8215190	C	T	ATTAAGGGCTTCTTCAGCATTAGATATAGAGGCATCCTTGGCAACAGCTATAGAGTACTCCCACTTGATATATAGCCCGAAGACTCCGGCAGAGTACATG[C/T]ATAGTGGTGAAACATTCCTTCCATAMAATYAGCCGGAAGAACCAAAATMTTTTCTTCACCACATTGCTGCGACGTGCACAACATGATCAACGACTAACTT
Ro06-8215216	Ro06	8215216	A	C	TAGAGGCATCCTTGGCAACAGCTATAGAGTACTCCCACTTGATATATAGCCCGAAGACTCCGGCAGAGTACATGYATAGTGGTGAAACATTCCTTCCATA[A/C]AATYAGCCGGAAGAACCAAAATMTTTTCTTCACCACATTGCTGCGACGTGCACAACATGATCAACGACTAACTTTTTGTATTATTCAACTTAAAGTGAAA
Ro06-8215220	Ro06	8215220	T	C	GGCATCCTTGGCAACAGCTATAGAGTACTCCCACTTGATATATAGCCCGAAGACTCCGGCAGAGTACATGYATAGTGGTGAAACATTCCTTCCATAMAAT[T/C]AGCCGGAAGAACCAAAATMTTTTCTTCACCACATTGCTGCGACGTGCACAACATGATCAACGACTAACTTTTTGTATTATTCAACTTAAAGTGAAAATGC
Ro06-8215239	Ro06	8215239	C	A	ATAGAGTACTCCCACTTGATATATAGCCCGAAGACTCCGGCAGAGTACATGYATAGTGGTGAAACATTCCTTCCATAMAATYAGCCGGAAGAACCAAAAT[C/A]TTTTCTTCACCACATTGCTGCGACGTGCACAACATGATCAACGACTAACTTTTTGTATTATTCAACTTAAAGTGAAAATGCAAAGAGACCTTGAGGATTC
Ro06-8217609	Ro06	8217609	G	A	AGTCACTGACTCTCATAACTGTATCAGCATTCACCATTTGAAGTTAATGTTTACTAACTCGATCTGAAACACCAGGGACACAAAGCATATTACGTAACTG[G/A]CAATCTGCACCTGCTTTTTTCAAAACATGCATGCTTGTCCAAGGCAGCTGAATTTTCTTGTTGAAGGACTTTTGTCAACATACTCTATATTAATACATAT
Ro06-8220484	Ro06	8220484	A	G	AATACAAATGAAAATTTAATGCTTAATTATTTCAACACCTTAACAATGTCACCCTCTTACATATACATTACGGCACATGCCTTTCCTCCCACAGTCACAT[A/G]TATTGTGAGAGCCTCCAAACTCTCTCTCTCTCTCTCTCTCTCTTTCTCTCTCTCTCTCTCTCTCATGGCTAATTTTTCCATTTGCACAGTTGTTATGGTG
Ro06-8231695	Ro06	8231695	T	C	AATCCGAGATGCTTTCATAGCCTCGATTTTAATGATGAGCTCATCTTCCTTTGTGAATTGATGTATCACATGCTCTCTACGCTCCTAAAGGGAATAGAAC[T/C]CTATCGAGCTTTAAAGATATATATAAACGCCAATGGATACCATGCGGAAACGCATGATGAGAATGGGATAGAATTCMTTTGCATTACCTCTAATGACTGC
Ro06-8231772	Ro06	8231772	C	A	TACGCTCCTAAAGGGAATAGAACYCTATCGAGCTTTAAAGATATATATAAACGCCAATGGATACCATGCGGAAACGCATGATGAGAATGGGATAGAATTC[C/A]TTTGCATTACCTCTAATGACTGCGAAAGAATGCGCATCTTAGAGAAGATTATGTGTATCTCTAGTAGATTGTACTCAATCACTATACGAGCTATTGAACC
Ro06-8234855	Ro06	8234855	G	A	CCAAAATCCTAGTGATGTTTTGGTGGGTTTTGCTGATATTGGGTATCTCTCTGGCCCTCATTAAGGTTGTTTCAATATGGGTTATGTCTAGCTTTACCAT[G/A]GGAAAYACCTTGTTATCTTGGTAGTCTATGAAACAGACTCTTGTCGCTACTTCTTCGAACCATGTTSAGATTATCTCYATGATGTTGTTCRTTAGTGTAC
Ro06-8234861	Ro06	8234861	C	T	TCCTAGTGATGTTTTGGTGGGTTTTGCTGATATTGGGTATCTCTCTGGCCCTCATTAAGGTTGTTTCAATATGGGTTATGTCTAGCTTTACCATRGGAAA[C/T]ACCTTGTTATCTTGGTAGTCTATGAAACAGACTCTTGTCGCTACTTCTTCGAACCATGTTSAGATTATCTCYATGATGTTGTTCRTTAGTGTACATGGTT
Ro06-8234922	Ro06	8234922	G	C	TGTTTCAATATGGGTTATGTCTAGCTTTACCATRGGAAAYACCTTGTTATCTTGGTAGTCTATGAAACAGACTCTTGTCGCTACTTCTTCGAACCATGTT[G/C]AGATTATCTCYATGATGTTGTTCRTTAGTGTACATGGTTGAGGTYCATAGTTACACATTTAAGAAGTACATGTGGTTTGAGGTCAACCACTGATGAACAT
Ro06-8234933	Ro06	8234933	C	T	GGGTTATGTCTAGCTTTACCATRGGAAAYACCTTGTTATCTTGGTAGTCTATGAAACAGACTCTTGTCGCTACTTCTTCGAACCATGTTSAGATTATCTC[C/T]ATGATGTTGTTCRTTAGTGTACATGGTTGAGGTYCATAGTTACACATTTAAGAAGTACATGTGGTTTGAGGTCAACCACTGATGAACATATATGCATTTA
Ro06-8234946	Ro06	8234946	G	A	CTTTACCATRGGAAAYACCTTGTTATCTTGGTAGTCTATGAAACAGACTCTTGTCGCTACTTCTTCGAACCATGTTSAGATTATCTCYATGATGTTGTTC[G/A]TTAGTGTACATGGTTGAGGTYCATAGTTACACATTTAAGAAGTACATGTGGTTTGAGGTCAACCACTGATGAACATATATGCATTTATGAGGATAATGCT
Ro06-8234967	Ro06	8234967	T	C	GTTATCTTGGTAGTCTATGAAACAGACTCTTGTCGCTACTTCTTCGAACCATGTTSAGATTATCTCYATGATGTTGTTCRTTAGTGTACATGGTTGAGGT[T/C]CATAGTTACACATTTAAGAAGTACATGTGGTTTGAGGTCAACCACTGATGAACATATATGCATTTATGAGGATAATGCTACTTGCAAATGAGGCAAGGTT
Ro06-8244784	Ro06	8244784	C	T	CATTAAGCTCCTCCCGAAGCAAGTCACCAACAGTCACAAACAAGGCTAGCAGGGCCTTGCATCCAACGTTTGCTCCTTAATTGACTGCGTCTCTGATCCG[C/T]TTCAATGTGTCCTGGACGAGKGTWGTTGCCGACTCCACGGCAGATTTRGCTGATGTAGCCTTCACTGAGATCTGGAACACCATAGTCAGTAGTGTTCCAT
Ro06-8244805	Ro06	8244805	T	G	AGTCACCAACAGTCACAAACAAGGCTAGCAGGGCCTTGCATCCAACGTTTGCTCCTTAATTGACTGCGTCTCTGATCCGYTTCAATGTGTCCTGGACGAG[T/G]GTWGTTGCCGACTCCACGGCAGATTTRGCTGATGTAGCCTTCACTGAGATCTGGAACACCATAGTCAGTAGTGTTCCATCAAGAATAGCTCCGGATATGT
Ro06-8244808	Ro06	8244808	T	A	CACCAACAGTCACAAACAAGGCTAGCAGGGCCTTGCATCCAACGTTTGCTCCTTAATTGACTGCGTCTCTGATCCGYTTCAATGTGTCCTGGACGAGKGT[T/A]GTTGCCGACTCCACGGCAGATTTRGCTGATGTAGCCTTCACTGAGATCTGGAACACCATAGTCAGTAGTGTTCCATCAAGAATAGCTCCGGATATGTTAG
Ro06-8244832	Ro06	8244832	A	G	GCAGGGCCTTGCATCCAACGTTTGCTCCTTAATTGACTGCGTCTCTGATCCGYTTCAATGTGTCCTGGACGAGKGTWGTTGCCGACTCCACGGCAGATTT[A/G]GCTGATGTAGCCTTCACTGAGATCTGGAACACCATAGTCAGTAGTGTTCCATCAAGAATAGCTCCGGATATGTTAGGCAGAATGGAGAAGCCTGAAGACA
Ro06-8244991	Ro06	8244991	G	A	TAGCTCCGGATATGTTAGGCAGAATGGAGAAGCCTGAAGACATAAGCGGAAATGGCTCCGGTTGAACTCCACATAACAAACACTGGAGAATGGAATGGTT[G/A]ATCGGCGCATAAATCACAGACGACCCCGTTGCATCGGTGCAACACTCCTGAAGAATAAGGAAGTCGTTGTGACTATCTATGGCGAGCACCGAAATCTGGT
Ro06-8245171	Ro06	8245171	A	C	TGGCGAGCACCGAAATCTGGTTCCGCAGGTCAAGACCGATGTTGAAGTTTGCTAGCACACGTACCGAGCTGTCCATCGACATACTATCCCACAGTGGTCT[A/C]GTCTGAACRTCTTTGWGRAACTCAAAGATCCTGGTGTGATGGGAAAGATGCACGACAGAACAACCAGCAGTACGATTGACTCCAGGGGGCTTGCTCGGAC
Ro06-8245180	Ro06	8245180	G	A	CCGAAATCTGGTTCCGCAGGTCAAGACCGATGTTGAAGTTTGCTAGCACACGTACCGAGCTGTCCATCGACATACTATCCCACAGTGGTCTMGTCTGAAC[G/A]TCTTTGWGRAACTCAAAGATCCTGGTGTGATGGGAAAGATGCACGACAGAACAACCAGCAGTACGATTGACTCCAGGGGGCTTGCTCGGACCTCCCCTCC
Ro06-8245187	Ro06	8245187	A	T	CTGGTTCCGCAGGTCAAGACCGATGTTGAAGTTTGCTAGCACACGTACCGAGCTGTCCATCGACATACTATCCCACAGTGGTCTMGTCTGAACRTCTTTG[A/T]GRAACTCAAAGATCCTGGTGTGATGGGAAAGATGCACGACAGAACAACCAGCAGTACGATTGACTCCAGGGGGCTTGCTCGGACCTCCCCTCCGCTTGTT
Ro06-8245189	Ro06	8245189	A	G	GGTTCCGCAGGTCAAGACCGATGTTGAAGTTTGCTAGCACACGTACCGAGCTGTCCATCGACATACTATCCCACAGTGGTCTMGTCTGAACRTCTTTGWG[A/G]AACTCAAAGATCCTGGTGTGATGGGAAAGATGCACGACAGAACAACCAGCAGTACGATTGACTCCAGGGGGCTTGCTCGGACCTCCCCTCCGCTTGTTGG
Ro06-8246663	Ro06	8246663	G	C	TTCTTCTAGTCCGATTTTTGGACCAAATCTTTCACATTGTGGCTTGGTGGGGTGAGAATACACCGCAAAGAAAGCTGCTAGTGCATCTCTCTGAGCCTTG[G/C]TGTAYTTYGWCCTCGGAAGTCTCCTATAGACAGGAGCGGCTTCCGGCTCGGCGGGTGGATCAGCAACCAGRATTGGTGCTTGGGGTAGTGGTTGCGGTTG
Ro06-8246668	Ro06	8246668	T	C	CTAGTCCGATTTTTGGACCAAATCTTTCACATTGTGGCTTGGTGGGGTGAGAATACACCGCAAAGAAAGCTGCTAGTGCATCTCTCTGAGCCTTGSTGTA[T/C]TTYGWCCTCGGAAGTCTCCTATAGACAGGAGCGGCTTCCGGCTCGGCGGGTGGATCAGCAACCAGRATTGGTGCTTGGGGTAGTGGTTGCGGTTGTGGTT
Ro06-8246671	Ro06	8246671	C	T	GTCCGATTTTTGGACCAAATCTTTCACATTGTGGCTTGGTGGGGTGAGAATACACCGCAAAGAAAGCTGCTAGTGCATCTCTCTGAGCCTTGSTGTAYTT[C/T]GWCCTCGGAAGTCTCCTATAGACAGGAGCGGCTTCCGGCTCGGCGGGTGGATCAGCAACCAGRATTGGTGCTTGGGGTAGTGGTTGCGGTTGTGGTTGTG
Ro06-8246673	Ro06	8246673	T	A	CCGATTTTTGGACCAAATCTTTCACATTGTGGCTTGGTGGGGTGAGAATACACCGCAAAGAAAGCTGCTAGTGCATCTCTCTGAGCCTTGSTGTAYTTYG[T/A]CCTCGGAAGTCTCCTATAGACAGGAGCGGCTTCCGGCTCGGCGGGTGGATCAGCAACCAGRATTGGTGCTTGGGGTAGTGGTTGCGGTTGTGGTTGTGGC
Ro06-8246734	Ro06	8246734	G	A	AAGCTGCTAGTGCATCTCTCTGAGCCTTGSTGTAYTTYGWCCTCGGAAGTCTCCTATAGACAGGAGCGGCTTCCGGCTCGGCGGGTGGATCAGCAACCAG[G/A]ATTGGTGCTTGGGGTAGTGGTTGCGGTTGTGGTTGTGGCTGGGTCGGCATGCTAGCATCGGCGCTATTGAGCATGCTCGGTGGAACTATTTCAGCCAAGC
Ro06-8252874	Ro06	8252874	A	C	GATGTCCACACCATGGAATAGGCAAATGGCAGCTTGTTTCATCATTCTATGATGGCCTATTTGATGATGATCGGAGGAGGCTTGACAACGCATGTGGTGG[A/C]AGCTTTCAAARGAAAGGACCTAATGCCGCYTGGGACATCATTGAGGAGCTTTCYWTTCAATCCRGGCAGTGGGACAACCATGACCRGAGGAGRGACACAA
Ro06-8252885	Ro06	8252885	A	G	CATGGAATAGGCAAATGGCAGCTTGTTTCATCATTCTATGATGGCCTATTTGATGATGATCGGAGGAGGCTTGACAACGCATGTGGTGGMAGCTTTCAAA[A/G]GAAAGGACCTAATGCCGCYTGGGACATCATTGAGGAGCTTTCYWTTCAATCCRGGCAGTGGGACAACCATGACCRGAGGAGRGACACAAGGCYAAGGGAA
Ro06-8252904	Ro06	8252904	T	C	AGCTTGTTTCATCATTCTATGATGGCCTATTTGATGATGATCGGAGGAGGCTTGACAACGCATGTGGTGGMAGCTTTCAAARGAAAGGACCTAATGCCGC[T/C]TGGGACATCATTGAGGAGCTTTCYWTTCAATCCRGGCAGTGGGACAACCATGACCRGAGGAGRGACACAAGGCYAAGGGAAAGAGAAGAGYCACATCTTG
Ro06-8252928	Ro06	8252928	T	C	GCCTATTTGATGATGATCGGAGGAGGCTTGACAACGCATGTGGTGGMAGCTTTCAAARGAAAGGACCTAATGCCGCYTGGGACATCATTGAGGAGCTTTC[T/C]WTTCAATCCRGGCAGTGGGACAACCATGACCRGAGGAGRGACACAAGGCYAAGGGAAAGAGAAGAGYCACATCTTGGTGGAAGAGAACCAAGAGGAGTAG
Ro06-8252929	Ro06	8252929	A	T	CCTATTTGATGATGATCGGAGGAGGCTTGACAACGCATGTGGTGGMAGCTTTCAAARGAAAGGACCTAATGCCGCYTGGGACATCATTGAGGAGCTTTCY[A/T]TTCAATCCRGGCAGTGGGACAACCATGACCRGAGGAGRGACACAAGGCYAAGGGAAAGAGAAGAGYCACATCTTGGTGGAAGAGAACCAAGAGGAGTAGA
Ro06-8252938	Ro06	8252938	G	A	TGATGATCGGAGGAGGCTTGACAACGCATGTGGTGGMAGCTTTCAAARGAAAGGACCTAATGCCGCYTGGGACATCATTGAGGAGCTTTCYWTTCAATCC[G/A]GGCAGTGGGACAACCATGACCRGAGGAGRGACACAAGGCYAAGGGAAAGAGAAGAGYCACATCTTGGTGGAAGAGAACCAAGAGGAGTAGAGCCAAGATC
Ro06-8252960	Ro06	8252960	G	A	AACGCATGTGGTGGMAGCTTTCAAARGAAAGGACCTAATGCCGCYTGGGACATCATTGAGGAGCTTTCYWTTCAATCCRGGCAGTGGGACAACCATGACC[G/A]GAGGAGRGACACAAGGCYAAGGGAAAGAGAAGAGYCACATCTTGGTGGAAGAGAACCAAGAGGAGTAGAGCCAAGATCAAGGGCAGTCCAAGGAGTCTCC
Ro06-8252967	Ro06	8252967	A	G	GTGGTGGMAGCTTTCAAARGAAAGGACCTAATGCCGCYTGGGACATCATTGAGGAGCTTTCYWTTCAATCCRGGCAGTGGGACAACCATGACCRGAGGAG[A/G]GACACAAGGCYAAGGGAAAGAGAAGAGYCACATCTTGGTGGAAGAGAACCAAGAGGAGTAGAGCCAAGATCAAGGGCAGTCCAAGGAGTCTCCCAAATTC
Ro06-8252978	Ro06	8252978	T	C	TTTCAAARGAAAGGACCTAATGCCGCYTGGGACATCATTGAGGAGCTTTCYWTTCAATCCRGGCAGTGGGACAACCATGACCRGAGGAGRGACACAAGGC[T/C]AAGGGAAAGAGAAGAGYCACATCTTGGTGGAAGAGAACCAAGAGGAGTAGAGCCAAGATCAAGGGCAGTCCAAGGAGTCTCCCAAATTCAACAAGTGGAT
Ro06-8252995	Ro06	8252995	C	T	TAATGCCGCYTGGGACATCATTGAGGAGCTTTCYWTTCAATCCRGGCAGTGGGACAACCATGACCRGAGGAGRGACACAAGGCYAAGGGAAAGAGAAGAG[C/T]CACATCTTGGTGGAAGAGAACCAAGAGGAGTAGAGCCAAGATCAAGGGCAGTCCAAGGAGTCTCCCAAATTCAACAAGTGGATGATTTAATGAATGCCAA
Ro06-8253402	Ro06	8253402	T	C	AAGTGGACAATTACAATCCGGAGCGCCACTCCTCACAGCTCAACAATCATCCTCAATACTCCTATGGCAAGAGGCATGTGGAGAATGCAGCCCTAACCAA[T/C]AGCCAAGGCCATCAAGGGRGCAGTACCTAYCAAGGAGGTAACAACTACCAAGGAGGTAGATTTCAAGGAGGAAGGTTTCAAGGAGGAAACCAACCATATC
Ro06-8253421	Ro06	8253421	G	A	GGAGCGCCACTCCTCACAGCTCAACAATCATCCTCAATACTCCTATGGCAAGAGGCATGTGGAGAATGCAGCCCTAACCAAYAGCCAAGGCCATCAAGGG[G/A]GCAGTACCTAYCAAGGAGGTAACAACTACCAAGGAGGTAGATTTCAAGGAGGAAGGTTTCAAGGAGGAAACCAACCATATCAAGGRGGGAGATCACAAGG
Ro06-8253432	Ro06	8253432	C	T	CCTCACAGCTCAACAATCATCCTCAATACTCCTATGGCAAGAGGCATGTGGAGAATGCAGCCCTAACCAAYAGCCAAGGCCATCAAGGGRGCAGTACCTA[C/T]CAAGGAGGTAACAACTACCAAGGAGGTAGATTTCAAGGAGGAAGGTTTCAAGGAGGAAACCAACCATATCAAGGRGGGAGATCACAAGGGTTTCAAGGCC
Ro06-8253507	Ro06	8253507	G	A	AAGGCCATCAAGGGRGCAGTACCTAYCAAGGAGGTAACAACTACCAAGGAGGTAGATTTCAAGGAGGAAGGTTTCAAGGAGGAAACCAACCATATCAAGG[G/A]GGGAGATCACAAGGGTTTCAAGGCCCTAACACCTTTCAAAGAGGAGCTCCAAATCCCATGTATGCTCAGGAGGCTAGCACCTCACAAGCTCCTCCAAGAC
Ro06-8254575	Ro06	8254575	A	G	TGTCCAAGCCTTCGTCTATTAGTGTCTTCAATCATGAAGATGGCACACCATTGGGGGAAGAATTTGGGCAGCTCTCTCTTGATCATGAGTTTGACAAGAG[A/G]GAYTAYARYAAGAGGAAGAGCAAGAATGTCACATTTGACAARGMGGATGGSAAGTTGAAGAGTGCACAAGTGCCAAGCMATGACATTCCTAKGAGATGTA
Ro06-8254578	Ro06	8254578	T	C	CCAAGCCTTCGTCTATTAGTGTCTTCAATCATGAAGATGGCACACCATTGGGGGAAGAATTTGGGCAGCTCTCTCTTGATCATGAGTTTGACAAGAGRGA[T/C]TAYARYAAGAGGAAGAGCAAGAATGTCACATTTGACAARGMGGATGGSAAGTTGAAGAGTGCACAAGTGCCAAGCMATGACATTCCTAKGAGATGTAACT
Ro06-8254581	Ro06	8254581	T	C	AGCCTTCGTCTATTAGTGTCTTCAATCATGAAGATGGCACACCATTGGGGGAAGAATTTGGGCAGCTCTCTCTTGATCATGAGTTTGACAAGAGRGAYTA[T/C]ARYAAGAGGAAGAGCAAGAATGTCACATTTGACAARGMGGATGGSAAGTTGAAGAGTGCACAAGTGCCAAGCMATGACATTCCTAKGAGATGTAACTTGA
Ro06-8254583	Ro06	8254583	A	G	CCTTCGTCTATTAGTGTCTTCAATCATGAAGATGGCACACCATTGGGGGAAGAATTTGGGCAGCTCTCTCTTGATCATGAGTTTGACAAGAGRGAYTAYA[A/G]YAAGAGGAAGAGCAAGAATGTCACATTTGACAARGMGGATGGSAAGTTGAAGAGTGCACAAGTGCCAAGCMATGACATTCCTAKGAGATGTAACTTGAGY
Ro06-8254584	Ro06	8254584	C	T	CTTCGTCTATTAGTGTCTTCAATCATGAAGATGGCACACCATTGGGGGAAGAATTTGGGCAGCTCTCTCTTGATCATGAGTTTGACAAGAGRGAYTAYAR[C/T]AAGAGGAAGAGCAAGAATGTCACATTTGACAARGMGGATGGSAAGTTGAAGAGTGCACAAGTGCCAAGCMATGACATTCCTAKGAGATGTAACTTGAGYA
Ro06-8254617	Ro06	8254617	A	G	GCACACCATTGGGGGAAGAATTTGGGCAGCTCTCTCTTGATCATGAGTTTGACAAGAGRGAYTAYARYAAGAGGAAGAGCAAGAATGTCACATTTGACAA[A/G]GMGGATGGSAAGTTGAAGAGTGCACAAGTGCCAAGCMATGACATTCCTAKGAGATGTAACTTGAGYATACCTCCTTTGCATGTAACAACTCATCAAGTGC
Ro06-8254619	Ro06	8254619	A	C	ACACCATTGGGGGAAGAATTTGGGCAGCTCTCTCTTGATCATGAGTTTGACAAGAGRGAYTAYARYAAGAGGAAGAGCAAGAATGTCACATTTGACAARG[A/C]GGATGGSAAGTTGAAGAGTGCACAAGTGCCAAGCMATGACATTCCTAKGAGATGTAACTTGAGYATACCTCCTTTGCATGTAACAACTCATCAAGTGCCT
Ro06-8254626	Ro06	8254626	C	G	TGGGGGAAGAATTTGGGCAGCTCTCTCTTGATCATGAGTTTGACAAGAGRGAYTAYARYAAGAGGAAGAGCAAGAATGTCACATTTGACAARGMGGATGG[C/G]AAGTTGAAGAGTGCACAAGTGCCAAGCMATGACATTCCTAKGAGATGTAACTTGAGYATACCTCCTTTGCATGTAACAACTCATCAAGTGCCTCTTCCAT
Ro06-8254654	Ro06	8254654	A	C	TGATCATGAGTTTGACAAGAGRGAYTAYARYAAGAGGAAGAGCAAGAATGTCACATTTGACAARGMGGATGGSAAGTTGAAGAGTGCACAAGTGCCAAGC[A/C]ATGACATTCCTAKGAGATGTAACTTGAGYATACCTCCTTTGCATGTAACAACTCATCAAGTGCCTCTTCCATTTCCTCAAGCTCAAAGGAAGGAGGATTT
Ro06-8254667	Ro06	8254667	G	T	GACAAGAGRGAYTAYARYAAGAGGAAGAGCAAGAATGTCACATTTGACAARGMGGATGGSAAGTTGAAGAGTGCACAAGTGCCAAGCMATGACATTCCTA[G/T]GAGATGTAACTTGAGYATACCTCCTTTGCATGTAACAACTCATCAAGTGCCTCTTCCATTTCCTCAAGCTCAAAGGAAGGAGGATTTACAGAAGAAGAAC
Ro06-8254683	Ro06	8254683	C	T	RYAAGAGGAAGAGCAAGAATGTCACATTTGACAARGMGGATGGSAAGTTGAAGAGTGCACAAGTGCCAAGCMATGACATTCCTAKGAGATGTAACTTGAG[C/T]ATACCTCCTTTGCATGTAACAACTCATCAAGTGCCTCTTCCATTTCCTCAAGCTCAAAGGAAGGAGGATTTACAGAAGAAGAACAATAAGTACCGCAAGG
Ro06-8255740	Ro06	8255740	G	T	GCTAGAGATGAAGCCACTGCCCTCCTCATTAAAGTATGCATACTTAGGGGAAGATGAGACACTTCCTATTGTTTTGTCTTCCAAGCTTTCCACATGTGAA[G/T]AGGAGAAATTGCTTGYTGTTTTGAGGGAACACAAGGCTGCCTTTGGATGGACTATAGCTGATATTAAGGGCATAAGTGCAAGTGTATGCACTCAYAACAT
Ro06-8255756	Ro06	8255756	C	T	CTGCCCTCCTCATTAAAGTATGCATACTTAGGGGAAGATGAGACACTTCCTATTGTTTTGTCTTCCAAGCTTTCCACATGTGAAKAGGAGAAATTGCTTG[C/T]TGTTTTGAGGGAACACAAGGCTGCCTTTGGATGGACTATAGCTGATATTAAGGGCATAAGTGCAAGTGTATGCACTCAYAACATCTACATGGAAGAGGGC
Ro06-8255835	Ro06	8255835	C	T	GTGAAKAGGAGAAATTGCTTGYTGTTTTGAGGGAACACAAGGCTGCCTTTGGATGGACTATAGCTGATATTAAGGGCATAAGTGCAAGTGTATGCACTCA[C/T]AACATCTACATGGAAGAGGGCAGCAAGCCTACAAGAGATGCCCAAAGGAGATTGAACCCACCAATGATGGAGGTGGTGAAGAATGAAGTCACAAAGCTCC
Ro06-8257981	Ro06	8257981	C	A	ACTGCCCTCATGACTAAGTATGGAGTAAAGCATAAGGTTGCCACACCTTATCATCCACAAACCAGCGGCCAAGTTGAGGTCTCTAACCGAGAGATCAAGT[C/A]TAKATTGRAGAAGGCTGTCAAYACTACTAGGAAGGATTGGAGCACAAAACTTCTTGATGYGTTGTGGGCTTATAGAACTGCATACAAGACCCCWTTGGGT
Ro06-8257984	Ro06	8257984	T	G	GCCCTCATGACTAAGTATGGAGTAAAGCATAAGGTTGCCACACCTTATCATCCACAAACCAGCGGCCAAGTTGAGGTCTCTAACCGAGAGATCAAGTMTA[T/G]ATTGRAGAAGGCTGTCAAYACTACTAGGAAGGATTGGAGCACAAAACTTCTTGATGYGTTGTGGGCTTATAGAACTGCATACAAGACCCCWTTGGGTATG
Ro06-8257989	Ro06	8257989	G	A	CATGACTAAGTATGGAGTAAAGCATAAGGTTGCCACACCTTATCATCCACAAACCAGCGGCCAAGTTGAGGTCTCTAACCGAGAGATCAAGTMTAKATTG[G/A]AGAAGGCTGTCAAYACTACTAGGAAGGATTGGAGCACAAAACTTCTTGATGYGTTGTGGGCTTATAGAACTGCATACAAGACCCCWTTGGGTATGTCTCC
Ro06-8258003	Ro06	8258003	C	T	GAGTAAAGCATAAGGTTGCCACACCTTATCATCCACAAACCAGCGGCCAAGTTGAGGTCTCTAACCGAGAGATCAAGTMTAKATTGRAGAAGGCTGTCAA[C/T]ACTACTAGGAAGGATTGGAGCACAAAACTTCTTGATGYGTTGTGGGCTTATAGAACTGCATACAAGACCCCWTTGGGTATGTCTCCCTATAGAMTTGTST
Ro06-8258041	Ro06	8258041	T	C	ACCAGCGGCCAAGTTGAGGTCTCTAACCGAGAGATCAAGTMTAKATTGRAGAAGGCTGTCAAYACTACTAGGAAGGATTGGAGCACAAAACTTCTTGATG[T/C]GTTGTGGGCTTATAGAACTGCATACAAGACCCCWTTGGGTATGTCTCCCTATAGAMTTGTSTATGGAAAAGCTTRCCACATGCCAGTGGAGTTGGAGCAC
Ro06-8258075	Ro06	8258075	T	A	TCAAGTMTAKATTGRAGAAGGCTGTCAAYACTACTAGGAAGGATTGGAGCACAAAACTTCTTGATGYGTTGTGGGCTTATAGAACTGCATACAAGACCCC[T/A]TTGGGTATGTCTCCCTATAGAMTTGTSTATGGAAAAGCTTRCCACATGCCAGTGGAGTTGGAGCACCGAGCATTTTGGGCTGTAAAGGCCATGAATTGGG
Ro06-8258097	Ro06	8258097	C	A	TGTCAAYACTACTAGGAAGGATTGGAGCACAAAACTTCTTGATGYGTTGTGGGCTTATAGAACTGCATACAAGACCCCWTTGGGTATGTCTCCCTATAGA[C/A]TTGTSTATGGAAAAGCTTRCCACATGCCAGTGGAGTTGGAGCACCGAGCATTTTGGGCTGTAAAGGCCATGAATTGGGACCTAAGAGCAGCCGGTGACAA
Ro06-8258102	Ro06	8258102	G	C	AYACTACTAGGAAGGATTGGAGCACAAAACTTCTTGATGYGTTGTGGGCTTATAGAACTGCATACAAGACCCCWTTGGGTATGTCTCCCTATAGAMTTGT[G/C]TATGGAAAAGCTTRCCACATGCCAGTGGAGTTGGAGCACCGAGCATTTTGGGCTGTAAAGGCCATGAATTGGGACCTAAGAGCAGCCGGTGACAAGAGGA
Ro06-8258116	Ro06	8258116	G	A	GATTGGAGCACAAAACTTCTTGATGYGTTGTGGGCTTATAGAACTGCATACAAGACCCCWTTGGGTATGTCTCCCTATAGAMTTGTSTATGGAAAAGCTT[G/A]CCACATGCCAGTGGAGTTGGAGCACCGAGCATTTTGGGCTGTAAAGGCCATGAATTGGGACCTAAGAGCAGCCGGTGACAAGAGGAGGTTGGACTTAAAT
Ro06-8258622	Ro06	8258622	T	C	GGAGGTTGAACGGTTCACCGAAGTCTCCCATGTCACCTAGGAAGAAGAAAGACCGGCTTGAGGGTCTTTAAAAACAAGCGCTCATGGGGAGGCAGCCCCA[T/C]ATCCYCRACTTTTGAAGTACRTCATGATAAGCATCACCAAAGGTCRTRMGCATTGGATTGCAAGGTCTTGAAACCTTGTTGTTGGTGATTGTTCGTGTCT
Ro06-8258627	Ro06	8258627	T	C	TTGAACGGTTCACCGAAGTCTCCCATGTCACCTAGGAAGAAGAAAGACCGGCTTGAGGGTCTTTAAAAACAAGCGCTCATGGGGAGGCAGCCCCAYATCC[T/C]CRACTTTTGAAGTACRTCATGATAAGCATCACCAAAGGTCRTRMGCATTGGATTGCAAGGTCTTGAAACCTTGTTGTTGGTGATTGTTCGTGTCTAAACG
Ro06-8258629	Ro06	8258629	G	A	GAACGGTTCACCGAAGTCTCCCATGTCACCTAGGAAGAAGAAAGACCGGCTTGAGGGTCTTTAAAAACAAGCGCTCATGGGGAGGCAGCCCCAYATCCYC[G/A]ACTTTTGAAGTACRTCATGATAAGCATCACCAAAGGTCRTRMGCATTGGATTGCAAGGTCTTGAAACCTTGTTGTTGGTGATTGTTCGTGTCTAAACGGA
Ro06-8258643	Ro06	8258643	A	G	AGTCTCCCATGTCACCTAGGAAGAAGAAAGACCGGCTTGAGGGTCTTTAAAAACAAGCGCTCATGGGGAGGCAGCCCCAYATCCYCRACTTTTGAAGTAC[A/G]TCATGATAAGCATCACCAAAGGTCRTRMGCATTGGATTGCAAGGTCTTGAAACCTTGTTGTTGGTGATTGTTCGTGTCTAAACGGAAAGCATGCGCTTCR
Ro06-8258668	Ro06	8258668	G	A	GAAAGACCGGCTTGAGGGTCTTTAAAAACAAGCGCTCATGGGGAGGCAGCCCCAYATCCYCRACTTTTGAAGTACRTCATGATAAGCATCACCAAAGGTC[G/A]TRMGCATTGGATTGCAAGGTCTTGAAACCTTGTTGTTGGTGATTGTTCGTGTCTAAACGGAAAGCATGCGCTTCRAAGGGGRGTACTTCTATCTTTGYTT
Ro06-8258670	Ro06	8258670	G	A	AAGACCGGCTTGAGGGTCTTTAAAAACAAGCGCTCATGGGGAGGCAGCCCCAYATCCYCRACTTTTGAAGTACRTCATGATAAGCATCACCAAAGGTCRT[G/A]MGCATTGGATTGCAAGGTCTTGAAACCTTGTTGTTGGTGATTGTTCGTGTCTAAACGGAAAGCATGCGCTTCRAAGGGGRGTACTTCTATCTTTGYTTKT
Ro06-8258671	Ro06	8258671	A	C	AGACCGGCTTGAGGGTCTTTAAAAACAAGCGCTCATGGGGAGGCAGCCCCAYATCCYCRACTTTTGAAGTACRTCATGATAAGCATCACCAAAGGTCRTR[A/C]GCATTGGATTGCAAGGTCTTGAAACCTTGTTGTTGGTGATTGTTCGTGTCTAAACGGAAAGCATGCGCTTCRAAGGGGRGTACTTCTATCTTTGYTTKTT
Ro06-8258743	Ro06	8258743	G	A	RTCATGATAAGCATCACCAAAGGTCRTRMGCATTGGATTGCAAGGTCTTGAAACCTTGTTGTTGGTGATTGTTCGTGTCTAAACGGAAAGCATGCGCTTC[G/A]AAGGGGRGTACTTCTATCTTTGYTTKTTTTCRTTMWTGTTTGWTTTKTGTGWTTGTGATTGTTTGTCATGTTTTCTCACCCAAAGTTTATTGTTRAATTC
Ro06-8258750	Ro06	8258750	A	G	TAAGCATCACCAAAGGTCRTRMGCATTGGATTGCAAGGTCTTGAAACCTTGTTGTTGGTGATTGTTCGTGTCTAAACGGAAAGCATGCGCTTCRAAGGGG[A/G]GTACTTCTATCTTTGYTTKTTTTCRTTMWTGTTTGWTTTKTGTGWTTGTGATTGTTTGTCATGTTTTCTCACCCAAAGTTTATTGTTRAATTCACTTATC
Ro06-8258766	Ro06	8258766	T	C	TCRTRMGCATTGGATTGCAAGGTCTTGAAACCTTGTTGTTGGTGATTGTTCGTGTCTAAACGGAAAGCATGCGCTTCRAAGGGGRGTACTTCTATCTTTG[T/C]TTKTTTTCRTTMWTGTTTGWTTTKTGTGWTTGTGATTGTTTGTCATGTTTTCTCACCCAAAGTTTATTGTTRAATTCACTTATCACATTGGGGACAATGT
Ro06-8258769	Ro06	8258769	G	T	TRMGCATTGGATTGCAAGGTCTTGAAACCTTGTTGTTGGTGATTGTTCGTGTCTAAACGGAAAGCATGCGCTTCRAAGGGGRGTACTTCTATCTTTGYTT[G/T]TTTTCRTTMWTGTTTGWTTTKTGTGWTTGTGATTGTTTGTCATGTTTTCTCACCCAAAGTTTATTGTTRAATTCACTTATCACATTGGGGACAATGTTMA
Ro06-8258775	Ro06	8258775	A	G	TTGGATTGCAAGGTCTTGAAACCTTGTTGTTGGTGATTGTTCGTGTCTAAACGGAAAGCATGCGCTTCRAAGGGGRGTACTTCTATCTTTGYTTKTTTTC[A/G]TTMWTGTTTGWTTTKTGTGWTTGTGATTGTTTGTCATGTTTTCTCACCCAAAGTTTATTGTTRAATTCACTTATCACATTGGGGACAATGTTMAGTTTAA
Ro06-8258778	Ro06	8258778	C	A	GATTGCAAGGTCTTGAAACCTTGTTGTTGGTGATTGTTCGTGTCTAAACGGAAAGCATGCGCTTCRAAGGGGRGTACTTCTATCTTTGYTTKTTTTCRTT[C/A]WTGTTTGWTTTKTGTGWTTGTGATTGTTTGTCATGTTTTCTCACCCAAAGTTTATTGTTRAATTCACTTATCACATTGGGGACAATGTTMAGTTTAAGTG
Ro06-8258779	Ro06	8258779	T	A	ATTGCAAGGTCTTGAAACCTTGTTGTTGGTGATTGTTCGTGTCTAAACGGAAAGCATGCGCTTCRAAGGGGRGTACTTCTATCTTTGYTTKTTTTCRTTM[T/A]TGTTTGWTTTKTGTGWTTGTGATTGTTTGTCATGTTTTCTCACCCAAAGTTTATTGTTRAATTCACTTATCACATTGGGGACAATGTTMAGTTTAAGTGT
Ro06-8258786	Ro06	8258786	T	A	GGTCTTGAAACCTTGTTGTTGGTGATTGTTCGTGTCTAAACGGAAAGCATGCGCTTCRAAGGGGRGTACTTCTATCTTTGYTTKTTTTCRTTMWTGTTTG[T/A]TTTKTGTGWTTGTGATTGTTTGTCATGTTTTCTCACCCAAAGTTTATTGTTRAATTCACTTATCACATTGGGGACAATGTTMAGTTTAAGTGTGGGGGTG
Ro06-8258790	Ro06	8258790	G	T	TTGAAACCTTGTTGTTGGTGATTGTTCGTGTCTAAACGGAAAGCATGCGCTTCRAAGGGGRGTACTTCTATCTTTGYTTKTTTTCRTTMWTGTTTGWTTT[G/T]TGTGWTTGTGATTGTTTGTCATGTTTTCTCACCCAAAGTTTATTGTTRAATTCACTTATCACATTGGGGACAATGTTMAGTTTAAGTGTGGGGGTGAGAT
Ro06-8258795	Ro06	8258795	T	A	ACCTTGTTGTTGGTGATTGTTCGTGTCTAAACGGAAAGCATGCGCTTCRAAGGGGRGTACTTCTATCTTTGYTTKTTTTCRTTMWTGTTTGWTTTKTGTG[T/A]TTGTGATTGTTTGTCATGTTTTCTCACCCAAAGTTTATTGTTRAATTCACTTATCACATTGGGGACAATGTTMAGTTTAAGTGTGGGGGTGAGATTGGGT
Ro06-8258838	Ro06	8258838	G	A	GCTTCRAAGGGGRGTACTTCTATCTTTGYTTKTTTTCRTTMWTGTTTGWTTTKTGTGWTTGTGATTGTTTGTCATGTTTTCTCACCCAAAGTTTATTGTT[G/A]AATTCACTTATCACATTGGGGACAATGTTMAGTTTAAGTGTGGGGGTGAGATTGGGTTCGTTTTGGCCAAAATGTTTCAATTTTTTCGATTTTTGTCAAG
Ro06-8258868	Ro06	8258868	A	C	TKTTTTCRTTMWTGTTTGWTTTKTGTGWTTGTGATTGTTTGTCATGTTTTCTCACCCAAAGTTTATTGTTRAATTCACTTATCACATTGGGGACAATGTT[A/C]AGTTTAAGTGTGGGGGTGAGATTGGGTTCGTTTTGGCCAAAATGTTTCAATTTTTTCGATTTTTGTCAAGTTCCAGTAGCTAATCCGCCCGGACACCCTG
Ro06-8259454	Ro06	8259454	C	A	AGCACACTTGACATGTATTCCCATGCATACCCAGAAAATGTGAGGTTTGAGCCAATTGAATATGCACATGTATGCATCTTTCATGTCTATATTTGTTCTT[C/A]ATGTGTGAAYATTGYATAAGGTTTGGACCTAGAACTTGCTCAAAGACCACTTGAAGCTTTTGATTGATCCATTTTGAGTTAGAAATGACTAAGGCATTAG
Ro06-8259464	Ro06	8259464	C	T	ACATGTATTCCCATGCATACCCAGAAAATGTGAGGTTTGAGCCAATTGAATATGCACATGTATGCATCTTTCATGTCTATATTTGTTCTTMATGTGTGAA[C/T]ATTGYATAAGGTTTGGACCTAGAACTTGCTCAAAGACCACTTGAAGCTTTTGATTGATCCATTTTGAGTTAGAAATGACTAAGGCATTAGTTGAACACCA
Ro06-8259469	Ro06	8259469	C	T	TATTCCCATGCATACCCAGAAAATGTGAGGTTTGAGCCAATTGAATATGCACATGTATGCATCTTTCATGTCTATATTTGTTCTTMATGTGTGAAYATTG[C/T]ATAAGGTTTGGACCTAGAACTTGCTCAAAGACCACTTGAAGCTTTTGATTGATCCATTTTGAGTTAGAAATGACTAAGGCATTAGTTGAACACCATTGCC
Ro06-8265522	Ro06	8265522	G	A	ATGGATTAGACAGAGATAATTCGAATGCAGTGGCATGTGACATGGTTTATGTCTTATCCGCCAAGTACGCATTACCAATTTCAGCTGATGCATGCCAAGC[G/A]TTGGARGTTGARGGTGATGATRARTCSCAGCTTRTTGCYAAGGARGAAGAAACTACTTTTCAGATTGAGGTGGATTCTGCYTTGAARAARTTATTCATGA
Ro06-8265528	Ro06	8265528	A	G	TAGACAGAGATAATTCGAATGCAGTGGCATGTGACATGGTTTATGTCTTATCCGCCAAGTACGCATTACCAATTTCAGCTGATGCATGCCAAGCRTTGGA[A/G]GTTGARGGTGATGATRARTCSCAGCTTRTTGCYAAGGARGAAGAAACTACTTTTCAGATTGAGGTGGATTCTGCYTTGAARAARTTATTCATGATGTTCT
Ro06-8265534	Ro06	8265534	G	A	GAGATAATTCGAATGCAGTGGCATGTGACATGGTTTATGTCTTATCCGCCAAGTACGCATTACCAATTTCAGCTGATGCATGCCAAGCRTTGGARGTTGA[G/A]GGTGATGATRARTCSCAGCTTRTTGCYAAGGARGAAGAAACTACTTTTCAGATTGAGGTGGATTCTGCYTTGAARAARTTATTCATGATGTTCTCYAARC
Ro06-8265544	Ro06	8265544	G	A	GAATGCAGTGGCATGTGACATGGTTTATGTCTTATCCGCCAAGTACGCATTACCAATTTCAGCTGATGCATGCCAAGCRTTGGARGTTGARGGTGATGAT[G/A]ARTCSCAGCTTRTTGCYAAGGARGAAGAAACTACTTTTCAGATTGAGGTGGATTCTGCYTTGAARAARTTATTCATGATGTTCTCYAARCCAAACYTGGC
Ro06-8265546	Ro06	8265546	A	G	ATGCAGTGGCATGTGACATGGTTTATGTCTTATCCGCCAAGTACGCATTACCAATTTCAGCTGATGCATGCCAAGCRTTGGARGTTGARGGTGATGATRA[A/G]TCSCAGCTTRTTGCYAAGGARGAAGAAACTACTTTTCAGATTGAGGTGGATTCTGCYTTGAARAARTTATTCATGATGTTCTCYAARCCAAACYTGGCRA
Ro06-8265549	Ro06	8265549	C	G	CAGTGGCATGTGACATGGTTTATGTCTTATCCGCCAAGTACGCATTACCAATTTCAGCTGATGCATGCCAAGCRTTGGARGTTGARGGTGATGATRARTC[C/G]CAGCTTRTTGCYAAGGARGAAGAAACTACTTTTCAGATTGAGGTGGATTCTGCYTTGAARAARTTATTCATGATGTTCTCYAARCCAAACYTGGCRATGT
Ro06-8265556	Ro06	8265556	A	G	ATGTGACATGGTTTATGTCTTATCCGCCAAGTACGCATTACCAATTTCAGCTGATGCATGCCAAGCRTTGGARGTTGARGGTGATGATRARTCSCAGCTT[A/G]TTGCYAAGGARGAAGAAACTACTTTTCAGATTGAGGTGGATTCTGCYTTGAARAARTTATTCATGATGTTCTCYAARCCAAACYTGGCRATGTCTATGCA
Ro06-8265561	Ro06	8265561	C	T	ACATGGTTTATGTCTTATCCGCCAAGTACGCATTACCAATTTCAGCTGATGCATGCCAAGCRTTGGARGTTGARGGTGATGATRARTCSCAGCTTRTTGC[C/T]AAGGARGAAGAAACTACTTTTCAGATTGAGGTGGATTCTGCYTTGAARAARTTATTCATGATGTTCTCYAARCCAAACYTGGCRATGTCTATGCATYTGA
Ro06-8265567	Ro06	8265567	G	A	TTTATGTCTTATCCGCCAAGTACGCATTACCAATTTCAGCTGATGCATGCCAAGCRTTGGARGTTGARGGTGATGATRARTCSCAGCTTRTTGCYAAGGA[G/A]GAAGAAACTACTTTTCAGATTGAGGTGGATTCTGCYTTGAARAARTTATTCATGATGTTCTCYAARCCAAACYTGGCRATGTCTATGCATYTGAGACCTC
Ro06-8265603	Ro06	8265603	T	C	CAGCTGATGCATGCCAAGCRTTGGARGTTGARGGTGATGATRARTCSCAGCTTRTTGCYAAGGARGAAGAAACTACTTTTCAGATTGAGGTGGATTCTGC[T/C]TTGAARAARTTATTCATGATGTTCTCYAARCCAAACYTGGCRATGTCTATGCATYTGAGACCTCTATACGCCACGGTAGCTGTGGAGGGGAAGGACATCA
Ro06-8265609	Ro06	8265609	A	G	ATGCATGCCAAGCRTTGGARGTTGARGGTGATGATRARTCSCAGCTTRTTGCYAAGGARGAAGAAACTACTTTTCAGATTGAGGTGGATTCTGCYTTGAA[A/G]AARTTATTCATGATGTTCTCYAARCCAAACYTGGCRATGTCTATGCATYTGAGACCTCTATACGCCACGGTAGCTGTGGAGGGGAAGGACATCAACAAGA
Ro06-8265612	Ro06	8265612	A	G	CATGCCAAGCRTTGGARGTTGARGGTGATGATRARTCSCAGCTTRTTGCYAAGGARGAAGAAACTACTTTTCAGATTGAGGTGGATTCTGCYTTGAARAA[A/G]TTATTCATGATGTTCTCYAARCCAAACYTGGCRATGTCTATGCATYTGAGACCTCTATACGCCACGGTAGCTGTGGAGGGGAAGGACATCAACAAGATGA
Ro06-8265630	Ro06	8265630	T	C	TTGARGGTGATGATRARTCSCAGCTTRTTGCYAAGGARGAAGAAACTACTTTTCAGATTGAGGTGGATTCTGCYTTGAARAARTTATTCATGATGTTCTC[T/C]AARCCAAACYTGGCRATGTCTATGCATYTGAGACCTCTATACGCCACGGTAGCTGTGGAGGGGAAGGACATCAACAAGATGATGGTTGATTCAGGAGCGG
Ro06-8265633	Ro06	8265633	A	G	ARGGTGATGATRARTCSCAGCTTRTTGCYAAGGARGAAGAAACTACTTTTCAGATTGAGGTGGATTCTGCYTTGAARAARTTATTCATGATGTTCTCYAA[A/G]CCAAACYTGGCRATGTCTATGCATYTGAGACCTCTATACGCCACGGTAGCTGTGGAGGGGAAGGACATCAACAAGATGATGGTTGATTCAGGAGCGGCAG
Ro06-8265640	Ro06	8265640	T	C	TGATRARTCSCAGCTTRTTGCYAAGGARGAAGAAACTACTTTTCAGATTGAGGTGGATTCTGCYTTGAARAARTTATTCATGATGTTCTCYAARCCAAAC[T/C]TGGCRATGTCTATGCATYTGAGACCTCTATACGCCACGGTAGCTGTGGAGGGGAAGGACATCAACAAGATGATGGTTGATTCAGGAGCGGCAGTCAATGT
Ro06-8265645	Ro06	8265645	G	A	ARTCSCAGCTTRTTGCYAAGGARGAAGAAACTACTTTTCAGATTGAGGTGGATTCTGCYTTGAARAARTTATTCATGATGTTCTCYAARCCAAACYTGGC[G/A]ATGTCTATGCATYTGAGACCTCTATACGCCACGGTAGCTGTGGAGGGGAAGGACATCAACAAGATGATGGTTGATTCAGGAGCGGCAGTCAATGTCATCA
Ro06-8265658	Ro06	8265658	T	C	TGCYAAGGARGAAGAAACTACTTTTCAGATTGAGGTGGATTCTGCYTTGAARAARTTATTCATGATGTTCTCYAARCCAAACYTGGCRATGTCTATGCAT[T/C]TGAGACCTCTATACGCCACGGTAGCTGTGGAGGGGAAGGACATCAACAAGATGATGGTTGATTCAGGAGCGGCAGTCAATGTCATCACAGTCCGCACAAT
Ro06-8267825	Ro06	8267825	C	T	TTTACTTTGCTGGTTACAAGCTCCGCCATTACATGTTGTCTTTCACTACAAGAGTTATGTCTCAGACTGATCTGGTGAAGTACATGCTCACTCGACCTAT[C/T]TTAAGRGGTCGAATTGGTAAGTGGATTCTTGCATTATCAGAATTTTCTTTACAATACGTGCCTCTSAARACACAAACCAGTCAGGCGGTTTCAAACTTTC
Ro06-8267831	Ro06	8267831	G	A	TTGCTGGTTACAAGCTCCGCCATTACATGTTGTCTTTCACTACAAGAGTTATGTCTCAGACTGATCTGGTGAAGTACATGCTCACTCGACCTATYTTAAG[G/A]GGTCGAATTGGTAAGTGGATTCTTGCATTATCAGAATTTTCTTTACAATACGTGCCTCTSAARACACAAACCAGTCAGGCGGTTTCAAACTTTCTCTTRC
Ro06-8267891	Ro06	8267891	G	C	CTGATCTGGTGAAGTACATGCTCACTCGACCTATYTTAAGRGGTCGAATTGGTAAGTGGATTCTTGCATTATCAGAATTTTCTTTACAATACGTGCCTCT[G/C]AARACACAAACCAGTCAGGCGGTTTCAAACTTTCTCTTRCATCATCCTGTTCCTGAAGACCATGTAATTCGCGACCTGGATATTGCAGCTATTTTGCTAC
Ro06-8267894	Ro06	8267894	G	A	ATCTGGTGAAGTACATGCTCACTCGACCTATYTTAAGRGGTCGAATTGGTAAGTGGATTCTTGCATTATCAGAATTTTCTTTACAATACGTGCCTCTSAA[G/A]ACACAAACCAGTCAGGCGGTTTCAAACTTTCTCTTRCATCATCCTGTTCCTGAAGACCATGTAATTCGCGACCTGGATATTGCAGCTATTTTGCTACCTT
Ro06-8267930	Ro06	8267930	G	A	GRGGTCGAATTGGTAAGTGGATTCTTGCATTATCAGAATTTTCTTTACAATACGTGCCTCTSAARACACAAACCAGTCAGGCGGTTTCAAACTTTCTCTT[G/A]CATCATCCTGTTCCTGAAGACCATGTAATTCGCGACCTGGATATTGCAGCTATTTTGCTACCTTCATGGGTATTATATTTCGACGGTTCGCGTACAGACA
Ro06-8271421	Ro06	8271421	G	A	TTTCTGGACCGCGGTTGTCACCTGTTGAGCAGCTTGTTCAAGTGAGGGCAGGGCGTCTAGCTTTGCAAGAAGAGCGTTTACTGTCTCCAATTCTTCTTCG[G/A]TGACGTGTGCCTGAAGGAAAGCAGCTTGTTCGCGAATTTTGGCAACCACCTCAGGATCATCGTACTTAGCACTTCCTAGATCACCAAGAAATTCTTTGGC
Ro06-8281268	Ro06	8281268	A	G	GACTAAAGAATGAACACATATGCCCATTCTTGTATTCTCTTCTAGCTTGTATATGAACGGTCATCTATAATTGATGGAATGGAGTATACATGGTCCAAAA[A/G]GCAGAGTCCATAATTGTGGGAATATTGGAGTATTGATTTGATGAAGATGAARCATATATGGTCATCCAGAAACTGTACGYATATCTATMTATCTTTACAT
Ro06-8281320	Ro06	8281320	A	G	ATGAACGGTCATCTATAATTGATGGAATGGAGTATACATGGTCCAAAARGCAGAGTCCATAATTGTGGGAATATTGGAGTATTGATTTGATGAAGATGAA[A/G]CATATATGGTCATCCAGAAACTGTACGYATATCTATMTATCTTTACATCWTCAAGGGGTTAGAAAATGACGTACATGCTGTAACGGTCCCATTACAAAAT
Ro06-8281348	Ro06	8281348	T	C	GGAGTATACATGGTCCAAAARGCAGAGTCCATAATTGTGGGAATATTGGAGTATTGATTTGATGAAGATGAARCATATATGGTCATCCAGAAACTGTACG[T/C]ATATCTATMTATCTTTACATCWTCAAGGGGTTAGAAAATGACGTACATGCTGTAACGGTCCCATTACAAAATCCTCCATTTCCATTGGGAAGAGAGAAAT
Ro06-8281357	Ro06	8281357	C	A	ATGGTCCAAAARGCAGAGTCCATAATTGTGGGAATATTGGAGTATTGATTTGATGAAGATGAARCATATATGGTCATCCAGAAACTGTACGYATATCTAT[C/A]TATCTTTACATCWTCAAGGGGTTAGAAAATGACGTACATGCTGTAACGGTCCCATTACAAAATCCTCCATTTCCATTGGGAAGAGAGAAATGGATAAATA
Ro06-8281370	Ro06	8281370	A	T	CAGAGTCCATAATTGTGGGAATATTGGAGTATTGATTTGATGAAGATGAARCATATATGGTCATCCAGAAACTGTACGYATATCTATMTATCTTTACATC[A/T]TCAAGGGGTTAGAAAATGACGTACATGCTGTAACGGTCCCATTACAAAATCCTCCATTTCCATTGGGAAGAGAGAAATGGATAAATAAGGTATGGTCTTG
Ro06-8284315	Ro06	8284315	G	T	TTTGGCATTGAGGGTGAGGCTTGTTCCCTACATCGTCTGCCTCTGAGGAACTAATATTGCCTACCTTTATTTGATTATAAAAAAAAAAGTAAACATGCAT[G/T]CATTAAGCTGACGTACGATTGACTAAGCTAGGTTTCCATACCAATATTAAAGTTAACTAGCTATTGGGTTTGCTTGTGATTGTGATAGAGAAATGMATCC
Ro06-8284411	Ro06	8284411	C	A	GCATKCATTAAGCTGACGTACGATTGACTAAGCTAGGTTTCCATACCAATATTAAAGTTAACTAGCTATTGGGTTTGCTTGTGATTGTGATAGAGAAATG[C/A]ATCCCATGCATGAAATGTGTAGTTTAGAATACGGTGTTGTAGTAGTCTCCATATATATTAGATATGCAAAATGAGATCGAATCTTTCGAAGCAATATATA
Ro06-8308476	Ro06	8308476	G	A	GGTTGACTTTTCGTCCTCTTCTCGGAAATGCTCCATATATAAGCTCTCAAATTGGGATCTAAAGCTGCTAAGTACCTCAACTCACTTATTCAACCTAAAA[G/A]CAATACAAACACACATTAATGATTTTATTTGRCTATTGGAGAAACAWTATTCAAGTAGTTAGAAACATGTTTTGTACGTAACTTATGTGCAAATCAGAAT
Ro06-8308508	Ro06	8308508	G	A	CCATATATAAGCTCTCAAATTGGGATCTAAAGCTGCTAAGTACCTCAACTCACTTATTCAACCTAAAARCAATACAAACACACATTAATGATTTTATTTG[G/A]CTATTGGAGAAACAWTATTCAAGTAGTTAGAAACATGTTTTGTACGTAACTTATGTGCAAATCAGAATTCAGATCTTCCAATCTAGGTTTAGGATGTGAT
Ro06-8308523	Ro06	8308523	T	A	CAAATTGGGATCTAAAGCTGCTAAGTACCTCAACTCACTTATTCAACCTAAAARCAATACAAACACACATTAATGATTTTATTTGRCTATTGGAGAAACA[T/A]TATTCAAGTAGTTAGAAACATGTTTTGTACGTAACTTATGTGCAAATCAGAATTCAGATCTTCCAATCTAGGTTTAGGATGTGATGCACGATGTATGTAT
Ro06-8350286	Ro06	8350286	A	G	ATGAGCGATTGCGCCGCGATCAGCTCGCTGCTCAAGAGGCTAGTGCCCGGGAAATCAGTCTGCTGAGGGAGCGCTTCACCCGGGATGCTGACCCCAGCCA[A/G]TCGGTGTCGGCACCTCTCCCGASAGTCGACACTCSTCTGAGACCAAGGCACCGAGTACCGGAAAGGCGGACCGGGCCCCTACCGGCTCCCCTAGTCTCGT
Ro06-8350309	Ro06	8350309	G	C	CTCGCTGCTCAAGAGGCTAGTGCCCGGGAAATCAGTCTGCTGAGGGAGCGCTTCACCCGGGATGCTGACCCCAGCCARTCGGTGTCGGCACCTCTCCCGA[G/C]AGTCGACACTCSTCTGAGACCAAGGCACCGAGTACCGGAAAGGCGGACCGGGCCCCTACCGGCTCCCCTAGTCTCGTTCCTTGACGTTGAGGGCGTAGTC
Ro06-8350321	Ro06	8350321	C	G	GAGGCTAGTGCCCGGGAAATCAGTCTGCTGAGGGAGCGCTTCACCCGGGATGCTGACCCCAGCCARTCGGTGTCGGCACCTCTCCCGASAGTCGACACTC[C/G]TCTGAGACCAAGGCACCGAGTACCGGAAAGGCGGACCGGGCCCCTACCGGCTCCCCTAGTCTCGTTCCTTGACGTTGAGGGCGTAGTCCATTCCGCTGGG
Ro06-8352246	Ro06	8352246	G	A	CACTCGTAATATCAGCCAAGGTTCATACCGACCTGATGCACAAGGTGCTGGTCGACGGTGGCAGCTCTGCCAATGTCATCTTCAAGAGTGCCTACCTCAA[G/A]TTGGACCTGCCCCTCGAGAACATCTCRAGGACRRTGAATCCACTCATCAGCTTCTCGGGAGACCTTSTYCAACCCCTCGGTAGCGTTTGGCTCAACGTCG
Ro06-8352273	Ro06	8352273	A	G	CCGACCTGATGCACAAGGTGCTGGTCGACGGTGGCAGCTCTGCCAATGTCATCTTCAAGAGTGCCTACCTCAARTTGGACCTGCCCCTCGAGAACATCTC[A/G]AGGACRRTGAATCCACTCATCAGCTTCTCGGGAGACCTTSTYCAACCCCTCGGTAGCGTTTGGCTCAACGTCGAGGTCRGRCAGTRCCCCYGRTCYCAGA
Ro06-8352279	Ro06	8352279	G	A	TGATGCACAAGGTGCTGGTCGACGGTGGCAGCTCTGCCAATGTCATCTTCAAGAGTGCCTACCTCAARTTGGACCTGCCCCTCGAGAACATCTCRAGGAC[G/A]RTGAATCCACTCATCAGCTTCTCGGGAGACCTTSTYCAACCCCTCGGTAGCGTTTGGCTCAACGTCGAGGTCRGRCAGTRCCCCYGRTCYCAGAARGTAT
Ro06-8352280	Ro06	8352280	G	A	GATGCACAAGGTGCTGGTCGACGGTGGCAGCTCTGCCAATGTCATCTTCAAGAGTGCCTACCTCAARTTGGACCTGCCCCTCGAGAACATCTCRAGGACR[G/A]TGAATCCACTCATCAGCTTCTCGGGAGACCTTSTYCAACCCCTCGGTAGCGTTTGGCTCAACGTCGAGGTCRGRCAGTRCCCCYGRTCYCAGAARGTATC
Ro06-8352313	Ro06	8352313	G	C	TGCCAATGTCATCTTCAAGAGTGCCTACCTCAARTTGGACCTGCCCCTCGAGAACATCTCRAGGACRRTGAATCCACTCATCAGCTTCTCGGGAGACCTT[G/C]TYCAACCCCTCGGTAGCGTTTGGCTCAACGTCGAGGTCRGRCAGTRCCCCYGRTCYCAGAARGTATCAGYTCAYATGCTGGTAGTGGATTGTGAATCCTC
Ro06-8352315	Ro06	8352315	C	T	CCAATGTCATCTTCAAGAGTGCCTACCTCAARTTGGACCTGCCCCTCGAGAACATCTCRAGGACRRTGAATCCACTCATCAGCTTCTCGGGAGACCTTST[C/T]CAACCCCTCGGTAGCGTTTGGCTCAACGTCGAGGTCRGRCAGTRCCCCYGRTCYCAGAARGTATCAGYTCAYATGCTGGTAGTGGATTGTGAATCCTCCT
Ro06-8352352	Ro06	8352352	G	A	CCTGCCCCTCGAGAACATCTCRAGGACRRTGAATCCACTCATCAGCTTCTCGGGAGACCTTSTYCAACCCCTCGGTAGCGTTTGGCTCAACGTCGAGGTC[G/A]GRCAGTRCCCCYGRTCYCAGAARGTATCAGYTCAYATGCTGGTAGTGGATTGTGAATCCTCCTACAACTTCATCCTCGGTAGGCCCATTCTCTGCCAAAT
Ro06-8352354	Ro06	8352354	A	G	TGCCCCTCGAGAACATCTCRAGGACRRTGAATCCACTCATCAGCTTCTCGGGAGACCTTSTYCAACCCCTCGGTAGCGTTTGGCTCAACGTCGAGGTCRG[A/G]CAGTRCCCCYGRTCYCAGAARGTATCAGYTCAYATGCTGGTAGTGGATTGTGAATCCTCCTACAACTTCATCCTCGGTAGGCCCATTCTCTGCCAAATCA
Ro06-8352359	Ro06	8352359	A	G	CTCGAGAACATCTCRAGGACRRTGAATCCACTCATCAGCTTCTCGGGAGACCTTSTYCAACCCCTCGGTAGCGTTTGGCTCAACGTCGAGGTCRGRCAGT[A/G]CCCCYGRTCYCAGAARGTATCAGYTCAYATGCTGGTAGTGGATTGTGAATCCTCCTACAACTTCATCCTCGGTAGGCCCATTCTCTGCCAAATCAGAGCC
Ro06-8352364	Ro06	8352364	C	T	GAACATCTCRAGGACRRTGAATCCACTCATCAGCTTCTCGGGAGACCTTSTYCAACCCCTCGGTAGCGTTTGGCTCAACGTCGAGGTCRGRCAGTRCCCC[C/T]GRTCYCAGAARGTATCAGYTCAYATGCTGGTAGTGGATTGTGAATCCTCCTACAACTTCATCCTCGGTAGGCCCATTCTCTGCCAAATCAGAGCCTGCGT
Ro06-8352366	Ro06	8352366	A	G	ACATCTCRAGGACRRTGAATCCACTCATCAGCTTCTCGGGAGACCTTSTYCAACCCCTCGGTAGCGTTTGGCTCAACGTCGAGGTCRGRCAGTRCCCCYG[A/G]TCYCAGAARGTATCAGYTCAYATGCTGGTAGTGGATTGTGAATCCTCCTACAACTTCATCCTCGGTAGGCCCATTCTCTGCCAAATCAGAGCCTGCGTGT
Ro06-8352369	Ro06	8352369	C	T	TCTCRAGGACRRTGAATCCACTCATCAGCTTCTCGGGAGACCTTSTYCAACCCCTCGGTAGCGTTTGGCTCAACGTCGAGGTCRGRCAGTRCCCCYGRTC[C/T]CAGAARGTATCAGYTCAYATGCTGGTAGTGGATTGTGAATCCTCCTACAACTTCATCCTCGGTAGGCCCATTCTCTGCCAAATCAGAGCCTGCGTGTGCT
Ro06-8352375	Ro06	8352375	G	A	GGACRRTGAATCCACTCATCAGCTTCTCGGGAGACCTTSTYCAACCCCTCGGTAGCGTTTGGCTCAACGTCGAGGTCRGRCAGTRCCCCYGRTCYCAGAA[G/A]GTATCAGYTCAYATGCTGGTAGTGGATTGTGAATCCTCCTACAACTTCATCCTCGGTAGGCCCATTCTCTGCCAAATCAGAGCCTGCGTGTGCTACTACT
Ro06-8352383	Ro06	8352383	C	T	AATCCACTCATCAGCTTCTCGGGAGACCTTSTYCAACCCCTCGGTAGCGTTTGGCTCAACGTCGAGGTCRGRCAGTRCCCCYGRTCYCAGAARGTATCAG[C/T]TCAYATGCTGGTAGTGGATTGTGAATCCTCCTACAACTTCATCCTCGGTAGGCCCATTCTCTGCCAAATCAGAGCCTGCGTGTGCTACTACTTGCTCATG
Ro06-8352387	Ro06	8352387	C	T	CACTCATCAGCTTCTCGGGAGACCTTSTYCAACCCCTCGGTAGCGTTTGGCTCAACGTCGAGGTCRGRCAGTRCCCCYGRTCYCAGAARGTATCAGYTCA[C/T]ATGCTGGTAGTGGATTGTGAATCCTCCTACAACTTCATCCTCGGTAGGCCCATTCTCTGCCAAATCAGAGCCTGCGTGTGCTACTACTTGCTCATGCTAA
Ro06-8353366	Ro06	8353366	A	G	ATGTCGGGGCCACCTATCAACGGTTGGTCAACCGCATGTTCTCCAGGCAGATCGGGAAGACCATGGAGGTATATGTGGACGACATGCTCGTCAAAAGCTT[A/G]AAGAAAGGTGACMACCTCACCGACCTACAGGAGACATTCTCCTTTCTCCAGGACTATGGGATGAAGCTGAATCCCGAGAAGTGCGTCTTCTGCGTAGGCG
Ro06-8353379	Ro06	8353379	C	A	CTATCAACGGTTGGTCAACCGCATGTTCTCCAGGCAGATCGGGAAGACCATGGAGGTATATGTGGACGACATGCTCGTCAAAAGCTTRAAGAAAGGTGAC[C/A]ACCTCACCGACCTACAGGAGACATTCTCCTTTCTCCAGGACTATGGGATGAAGCTGAATCCCGAGAAGTGCGTCTTCTGCGTAGGCGAAGGAAAATTCCT
Ro06-8356998	Ro06	8356998	A	G	CATTGATCATGCTCTCGGTCACAGTTGGTATTGGAAGCTGACTCCAATCTTGACCCAGGAAGGCACCTTTGATCTTGCCGAGTATGTAAACCCCACCCTC[A/G]ACATAGGCTGTCGTCTGCTCCACAGCAYGGCCACGGTCACGCMGGTTGGCAAGGAYAGCCTCCTCYACGGCCTTACCGAGACGGATGTCRAAATCGGCCT
Ro06-8357026	Ro06	8357026	C	T	TATTGGAAGCTGACTCCAATCTTGACCCAGGAAGGCACCTTTGATCTTGCCGAGTATGTAAACCCCACCCTCRACATAGGCTGTCGTCTGCTCCACAGCA[C/T]GGCCACGGTCACGCMGGTTGGCAAGGAYAGCCTCCTCYACGGCCTTACCGAGACGGATGTCRAAATCGGCCTGGATCCTGGCTGTCTCGGAGGCAACAAC
Ro06-8357041	Ro06	8357041	C	A	CCAATCTTGACCCAGGAAGGCACCTTTGATCTTGCCGAGTATGTAAACCCCACCCTCRACATAGGCTGTCGTCTGCTCCACAGCAYGGCCACGGTCACGC[C/A]GGTTGGCAAGGAYAGCCTCCTCYACGGCCTTACCGAGACGGATGTCRAAATCGGCCTGGATCCTGGCTGTCTCGGAGGCAACAACAGTTTTGGCTTTCTC
Ro06-8357054	Ro06	8357054	C	T	AGGAAGGCACCTTTGATCTTGCCGAGTATGTAAACCCCACCCTCRACATAGGCTGTCGTCTGCTCCACAGCAYGGCCACGGTCACGCMGGTTGGCAAGGA[C/T]AGCCTCCTCYACGGCCTTACCGAGACGGATGTCRAAATCGGCCTGGATCCTGGCTGTCTCGGAGGCAACAACAGTTTTGGCTTTCTCCTCGACCTCCCGG
Ro06-8357064	Ro06	8357064	C	T	CTTTGATCTTGCCGAGTATGTAAACCCCACCCTCRACATAGGCTGTCGTCTGCTCCACAGCAYGGCCACGGTCACGCMGGTTGGCAAGGAYAGCCTCCTC[C/T]ACGGCCTTACCGAGACGGATGTCRAAATCGGCCTGGATCCTGGCTGTCTCGGAGGCAACAACAGTTTTGGCTTTCTCCTCGACCTCCCGGGCGTAGACAC
Ro06-8357088	Ro06	8357088	A	G	CCCCACCCTCRACATAGGCTGTCGTCTGCTCCACAGCAYGGCCACGGTCACGCMGGTTGGCAAGGAYAGCCTCCTCYACGGCCTTACCGAGACGGATGTC[A/G]AAATCGGCCTGGATCCTGGCTGTCTCGGAGGCAACAACAGTTTTGGCTTTCTCCTCGACCTCCCGGGCGTAGACACTGGCCCTCTCCTCCGCTTGGGCAA
Ro06-8364827	Ro06	8364827	C	T	CTTTCAGGCAAAGAGATTGGATCAACTTGTTGTACTCATCAGCAGTCGGTTGGACCCCATAATCTTTCATCTCGTGCAACAACTCCAAAGCCTTGTCAAA[C/T]TCTTCCAGTTTACGAAAGCTGGAGATGAGTGTATGATAWGTAACAGGAGTCAGTTTAGCATGCTTCTTTTTGGCTTCAGATAAGATATTACACGCCTCCT
Ro06-8364866	Ro06	8364866	A	T	CAGCAGTCGGTTGGACCCCATAATCTTTCATCTCGTGCAACAACTCCAAAGCCTTGTCAAAYTCTTCCAGTTTACGAAAGCTGGAGATGAGTGTATGATA[A/T]GTAACAGGAGTCAGTTTAGCATGCTTCTTTTTGGCTTCAGATAAGATATTACACGCCTCCTCCATCTGACCTCCTTTTGCATAACCACTCATAATAACAG
Ro06-8368948	Ro06	8368948	A	T	AACACATGCAAGAGCGTGCTGTACGTGTGATCTGTTCCAGGCCGGCCGGTGAAGGAAATGGCCTTGTGGCTTGTGCATATTAATTAGTTAGGGGTCCTAT[A/T]GATATATATACATATATTGATSCCATGGGCTTGCTGGTATGGAACTTCCATCTCAGTGCCAATTAGTACTAGTGGTACAGTTATGCAGATAGTAGAGTCA
Ro06-8368970	Ro06	8368970	C	G	ACGTGTGATCTGTTCCAGGCCGGCCGGTGAAGGAAATGGCCTTGTGGCTTGTGCATATTAATTAGTTAGGGGTCCTATWGATATATATACATATATTGAT[C/G]CCATGGGCTTGCTGGTATGGAACTTCCATCTCAGTGCCAATTAGTACTAGTGGTACAGTTATGCAGATAGTAGAGTCATCGATCAGAGCATGAATGCATG
Ro06-8380784	Ro06	8380784	A	G	AGACATTGGAACAAATTCACATGGCGTTATTGATTAGCATATGATATGATGGTACATATATATAAACAAGTTCACATGCATAGTGTTATATATTATCCAA[A/G]TACAATCAATMAGTGTAAGTAGTTGTTTGTTATAACTAATTATATATATATATGGTGCCATTTATTCATGCAACTGCTTGTCAACTTCAACTCTTAAACT
Ro06-8380795	Ro06	8380795	C	A	CAAATTCACATGGCGTTATTGATTAGCATATGATATGATGGTACATATATATAAACAAGTTCACATGCATAGTGTTATATATTATCCAARTACAATCAAT[C/A]AGTGTAAGTAGTTGTTTGTTATAACTAATTATATATATATATGGTGCCATTTATTCATGCAACTGCTTGTCAACTTCAACTCTTAAACTCATGTTAATCA
Ro06-8381305	Ro06	8381305	A	C	AGTTAGTCATAACTCATAAGTAGTCGATCTCCCTGTTCAATTTCAACCACGTCGAGCAGTTAGAACAACTTGTTGAAGTAGACTCTGCTATATATATATC[A/C]AAATCATTGTTTATGTGCGCGCATGTTGAGTTTGGAAGGTGTTTGATAGGGATCTGGGATGGAACCCTTGAATGAATTTATCTGAATTAATTTCAAAATG
Ro06-8384699	Ro06	8384699	A	G	GTAAAAGGTGAGACATCCGGCTCATATCCAGTTACCATCTAGTACGCATAAAACGGGTGATTGGTAGTGGGTCTGAAAACGAAGAAGTAAAGCTGCATGC[A/G]ATATTGCATAACCCCAAGCAGATAATRGGAGATTGGTGCGCATAATCAATGTYCGAGACCATTTWTGTTTAYGCACATGGGGTATGAGATATTTACTTTA
Ro06-8384726	Ro06	8384726	A	G	CCAGTTACCATCTAGTACGCATAAAACGGGTGATTGGTAGTGGGTCTGAAAACGAAGAAGTAAAGCTGCATGCRATATTGCATAACCCCAAGCAGATAAT[A/G]GGAGATTGGTGCGCATAATCAATGTYCGAGACCATTTWTGTTTAYGCACATGGGGTATGAGATATTTACTTTAATCCCAATAAATATGCAATAATCATCA
Ro06-8384752	Ro06	8384752	C	T	CGGGTGATTGGTAGTGGGTCTGAAAACGAAGAAGTAAAGCTGCATGCRATATTGCATAACCCCAAGCAGATAATRGGAGATTGGTGCGCATAATCAATGT[C/T]CGAGACCATTTWTGTTTAYGCACATGGGGTATGAGATATTTACTTTAATCCCAATAAATATGCAATAATCATCAAACTTCTGTGATGTAAACTCTCTAGC
Ro06-8384764	Ro06	8384764	T	A	AGTGGGTCTGAAAACGAAGAAGTAAAGCTGCATGCRATATTGCATAACCCCAAGCAGATAATRGGAGATTGGTGCGCATAATCAATGTYCGAGACCATTT[T/A]TGTTTAYGCACATGGGGTATGAGATATTTACTTTAATCCCAATAAATATGCAATAATCATCAAACTTCTGTGATGTAAACTCTCTAGCATTGTCAAGACA
Ro06-8384771	Ro06	8384771	T	C	CTGAAAACGAAGAAGTAAAGCTGCATGCRATATTGCATAACCCCAAGCAGATAATRGGAGATTGGTGCGCATAATCAATGTYCGAGACCATTTWTGTTTA[T/C]GCACATGGGGTATGAGATATTTACTTTAATCCCAATAAATATGCAATAATCATCAAACTTCTGTGATGTAAACTCTCTAGCATTGTCAAGACATATTTGA
Ro06-8388623	Ro06	8388623	C	T	CTCTGTGCATATAACTTCCCATTATTTGTCTCCATATAACTTTCTATTATCTCTAAAATAACTTTTTATTATTTGATCTGGATAAAAAAATAACTCTACA[C/T]TGCAGAACARAGAAAASTAGTATAAATAATAAAAACTAGAAYAATGCTAAAAGGGTCACATTTTCGTACCACATTAGTTCATCACAMTGTGTTGGTGTAT
Ro06-8388633	Ro06	8388633	G	A	ATAACTTCCCATTATTTGTCTCCATATAACTTTCTATTATCTCTAAAATAACTTTTTATTATTTGATCTGGATAAAAAAATAACTCTACAYTGCAGAACA[G/A]AGAAAASTAGTATAAATAATAAAAACTAGAAYAATGCTAAAAGGGTCACATTTTCGTACCACATTAGTTCATCACAMTGTGTTGGTGTATATTTAATTAA
Ro06-8388640	Ro06	8388640	C	G	CCCATTATTTGTCTCCATATAACTTTCTATTATCTCTAAAATAACTTTTTATTATTTGATCTGGATAAAAAAATAACTCTACAYTGCAGAACARAGAAAA[C/G]TAGTATAAATAATAAAAACTAGAAYAATGCTAAAAGGGTCACATTTTCGTACCACATTAGTTCATCACAMTGTGTTGGTGTATATTTAATTAACAACATG
Ro06-8388665	Ro06	8388665	T	C	TCTATTATCTCTAAAATAACTTTTTATTATTTGATCTGGATAAAAAAATAACTCTACAYTGCAGAACARAGAAAASTAGTATAAATAATAAAAACTAGAA[T/C]AATGCTAAAAGGGTCACATTTTCGTACCACATTAGTTCATCACAMTGTGTTGGTGTATATTTAATTAACAACATGTACATGATTAGACGAGAGTACRAGA
Ro06-8388710	Ro06	8388710	C	A	AAATAACTCTACAYTGCAGAACARAGAAAASTAGTATAAATAATAAAAACTAGAAYAATGCTAAAAGGGTCACATTTTCGTACCACATTAGTTCATCACA[C/A]TGTGTTGGTGTATATTTAATTAACAACATGTACATGATTAGACGAGAGTACRAGACAATGATTTTATCAAATTTTACTCGAACTTATTYGGTACTTTGAC
Ro06-8388762	Ro06	8388762	G	A	GAAYAATGCTAAAAGGGTCACATTTTCGTACCACATTAGTTCATCACAMTGTGTTGGTGTATATTTAATTAACAACATGTACATGATTAGACGAGAGTAC[G/A]AGACAATGATTTTATCAAATTTTACTCGAACTTATTYGGTACTTTGACATGGGATGATGTGGTAAGGCCAAAAACATTTGACATGCAAGGTTGAGGTAAT
Ro06-8388799	Ro06	8388799	T	C	AGTTCATCACAMTGTGTTGGTGTATATTTAATTAACAACATGTACATGATTAGACGAGAGTACRAGACAATGATTTTATCAAATTTTACTCGAACTTATT[T/C]GGTACTTTGACATGGGATGATGTGGTAAGGCCAAAAACATTTGACATGCAAGGTTGAGGTAATTTTTGTTCTTCCTAGATCTAGTTAGGCGAAAATTCTC
Ro06-8410253	Ro06	8410253	C	A	ATACATGTTAACATACATGTATAATACTAAGTGTTGATGTATTCACTTAGTAAATAAGATAAGATCATGCACCAATATAAGATTAGTAGATAATCAAGTG[C/A]AAGTAAAAYACATATAAAGAGAGGCATATGTAAAACAAGATATACATATGTTCATAAATGTAAAACATAAGTAATTGAACTCATGTAATAAGCAAGATCA
Ro06-8410262	Ro06	8410262	T	C	AACATACATGTATAATACTAAGTGTTGATGTATTCACTTAGTAAATAAGATAAGATCATGCACCAATATAAGATTAGTAGATAATCAAGTGMAAGTAAAA[T/C]ACATATAAAGAGAGGCATATGTAAAACAAGATATACATATGTTCATAAATGTAAAACATAAGTAATTGAACTCATGTAATAAGCAAGATCATTATCATAA
Ro06-8416181	Ro06	8416181	A	G	ACCTATATTTCTCCCTCCTATTTTCTCTTCTCTTTCTCCACATGTCAATGTATTACTTGATGAAATTTTGTATATGACTAATAAATAGCGGAGTGAAATT[A/G]TTAAATTGCTARCTAAATCTCAGTTTTCTASGTATTTTAACTTTAAAAATGGATATTATTGTTGGAGATGTCCCCATACCCGGCTTGATCCCCGTTAACA
Ro06-8416193	Ro06	8416193	A	G	CCCTCCTATTTTCTCTTCTCTTTCTCCACATGTCAATGTATTACTTGATGAAATTTTGTATATGACTAATAAATAGCGGAGTGAAATTRTTAAATTGCTA[A/G]CTAAATCTCAGTTTTCTASGTATTTTAACTTTAAAAATGGATATTATTGTTGGAGATGTCCCCATACCCGGCTTGATCCCCGTTAACAAATATTACTAAT
Ro06-8416212	Ro06	8416212	G	C	CTTTCTCCACATGTCAATGTATTACTTGATGAAATTTTGTATATGACTAATAAATAGCGGAGTGAAATTRTTAAATTGCTARCTAAATCTCAGTTTTCTA[G/C]GTATTTTAACTTTAAAAATGGATATTATTGTTGGAGATGTCCCCATACCCGGCTTGATCCCCGTTAACAAATATTACTAATTTATTATACAAATTTTTTT
Ro06-8418038	Ro06	8418038	A	T	CGTTTAGCATTTTGGTGATGTTGAAAGCATATGAATGAGAGAAAAAGAGAAACAAGGAGAGCAAGAGACTAGCACTTGGAAAATACATGTTTGCACAAAT[A/T]KACACAAGTGTTGAAGATAGAAACCAAGGAGACAAAGAATGAGAGAGAAGTGCCTTTCAAGTGGGATAGAAAACACATATATATATATGTTTGAAGGGAA
Ro06-8418039	Ro06	8418039	T	G	GTTTAGCATTTTGGTGATGTTGAAAGCATATGAATGAGAGAAAAAGAGAAACAAGGAGAGCAAGAGACTAGCACTTGGAAAATACATGTTTGCACAAATW[T/G]ACACAAGTGTTGAAGATAGAAACCAAGGAGACAAAGAATGAGAGAGAAGTGCCTTTCAAGTGGGATAGAAAACACATATATATATATGTTTGAAGGGAAG
Ro06-8451362	Ro06	8451362	A	G	AGGTTATTGAATGACTAGAAGTTGCACTAAAAGAACAAAGTCCTGAATTTGAATCATGGCAACATCTTGGAGGTACCCCAATGATATACCCGCAATAAGA[A/G]AACTGCATGTGCCTGAAGGAGTAGTCAGGTGCTCTCAGAGGATCAGGTATCCATGCATAACGTTATGATACTTTGTTTGTGTGTTTACAAGTAATTACTT
Ro06-8453881	Ro06	8453881	T	C	ACCTATTTCTGAGATATTAGATCAGATATGGAGAACTATGATGCGCCTCACATGGAATGCATCTACTTCGTACACATCTGACTTAACAGTTGAGAAACAA[T/C]TCCTTAGGTTACTCACAAAAATGTGTGTGTGTGTGTGTGTATTAAAGAACAAATGGGAAGTGATGTCACATGGCGACAACAATATGGATCTACTGCCATC
Ro06-8498297	Ro06	8498297	A	G	GTTATGAGAAGCCAATTATTGTCTAAATTCCACATGTACCTGATTGCAAGCAGTTGGTATAAGCTTTAGTTACTATTGTCCCTTTTTTGTTTTTCTATAT[A/G]CTTGTAGCTGCTTTTGTTTTAAATGATCTTGAAGTCAAAGGGATAGGCATATCTTGGAATTTCTATATTCGACGGAGATGGGCTGTCTAGGTCTGACTTA
Ro06-8507366	Ro06	8507366	T	G	TGCAGATCTTTAAGATGCTTATAGGGCTTGAGGAAGAAAGAGAGAAACAGAACTACTTCAAGTTATATAGGTGTGAAGGGGCTTTGTATAGTTTACGAAG[T/G]TGAGGCATGCAGTTTTATAATTGCTCATATTTTTCTTTTTCTTTTTGTATCTATCTTGCGTTGTTGTAAATACATATGTCAATCTACCAACGCCTGGTGG
Ro06-8517377	Ro06	8517377	C	T	CAAAATCGTCCTCCAAGTTATTGGTCGATAGATGGGAATAGGTATTGAAAGCTTTGACCAACTCTAAATGATATTGATGCTTGTGCTATTATATATGCAG[C/T]GTTATCAATATAATTTAGAGGGTTACACATTCAGGGCATCTTCAGTGACATAGCACCAAACTTCTCACTTTCACCACATGTATAAGTTGCCCTGAACACA
Ro06-8518112	Ro06	8518112	C	T	TGAATTAAAATAATTGTCAACTAAATTAGATGTCTGATCTCCTCCAATGTAACAAAAAATAGGTTTAAACTAAGCAATTTTGAGTGGCCAAAATAAAAAA[C/T]GAAGCAATTTTGAAGGTTCATCAAAATGCCCAATAGACTTGTGACATGTAACTGAGTTGACCTGATAATGATCATGAACAAAACTTTCTTCACGTTTTAT
Ro06-8518894	Ro06	8518894	A	G	TGCTCGATGGGCTAGCTCGAGATTGGACAATGGGCCCATCTATTAGGTTTGACAATATATCCACGTGTGTAACCTAATGGCGACATGTGAATGATTTAAC[A/G]GGTTATAAAGATGATARGTYTGATTCRGACAWGMTTTCTCCACTACATAGGACTATGCACTTTTAAAGTACATAGTTCTAATRTAAACCGTCATATTAGA
Ro06-8518911	Ro06	8518911	A	G	CGAGATTGGACAATGGGCCCATCTATTAGGTTTGACAATATATCCACGTGTGTAACCTAATGGCGACATGTGAATGATTTAACRGGTTATAAAGATGATA[A/G]GTYTGATTCRGACAWGMTTTCTCCACTACATAGGACTATGCACTTTTAAAGTACATAGTTCTAATRTAAACCGTCATATTAGATCATTTAAAGAGATCTG
Ro06-8518914	Ro06	8518914	C	T	GATTGGACAATGGGCCCATCTATTAGGTTTGACAATATATCCACGTGTGTAACCTAATGGCGACATGTGAATGATTTAACRGGTTATAAAGATGATARGT[C/T]TGATTCRGACAWGMTTTCTCCACTACATAGGACTATGCACTTTTAAAGTACATAGTTCTAATRTAAACCGTCATATTAGATCATTTAAAGAGATCTGAAG
Ro06-8518921	Ro06	8518921	G	A	CAATGGGCCCATCTATTAGGTTTGACAATATATCCACGTGTGTAACCTAATGGCGACATGTGAATGATTTAACRGGTTATAAAGATGATARGTYTGATTC[G/A]GACAWGMTTTCTCCACTACATAGGACTATGCACTTTTAAAGTACATAGTTCTAATRTAAACCGTCATATTAGATCATTTAAAGAGATCTGAAGGCTAACA
Ro06-8518926	Ro06	8518926	T	A	GGCCCATCTATTAGGTTTGACAATATATCCACGTGTGTAACCTAATGGCGACATGTGAATGATTTAACRGGTTATAAAGATGATARGTYTGATTCRGACA[T/A]GMTTTCTCCACTACATAGGACTATGCACTTTTAAAGTACATAGTTCTAATRTAAACCGTCATATTAGATCATTTAAAGAGATCTGAAGGCTAACATTAGA
Ro06-8518928	Ro06	8518928	A	C	CCCATCTATTAGGTTTGACAATATATCCACGTGTGTAACCTAATGGCGACATGTGAATGATTTAACRGGTTATAAAGATGATARGTYTGATTCRGACAWG[A/C]TTTCTCCACTACATAGGACTATGCACTTTTAAAGTACATAGTTCTAATRTAAACCGTCATATTAGATCATTTAAAGAGATCTGAAGGCTAACATTAGAAC
Ro06-8518977	Ro06	8518977	G	A	CATGTGAATGATTTAACRGGTTATAAAGATGATARGTYTGATTCRGACAWGMTTTCTCCACTACATAGGACTATGCACTTTTAAAGTACATAGTTCTAAT[G/A]TAAACCGTCATATTAGATCATTTAAAGAGATCTGAAGGCTAACATTAGAACTATGTACTTTAAAAGTACATAATCCTATGTAGTGGAGAAATTTTTTTGA
Ro06-8521819	Ro06	8521819	T	C	ATAATTTTGGTGAATCCTCAAAAAATAGAACAAGATAAGAATGATGTCCGCATGTTTGATTCATTAATCTATTGAGAATGATGTTTATCTGTTCTGATCA[T/C]TGTTTTTTCGAATCTCTTGGTATWTAACTTCACCTGATGCAGCTGAACTTTGAGACATGACCTCATGTGTACTGCCACTTTGTTTCGTCAGTTTGAGATA
Ro06-8521843	Ro06	8521843	T	A	ATAGAACAAGATAAGAATGATGTCCGCATGTTTGATTCATTAATCTATTGAGAATGATGTTTATCTGTTCTGATCAYTGTTTTTTCGAATCTCTTGGTAT[T/A]TAACTTCACCTGATGCAGCTGAACTTTGAGACATGACCTCATGTGTACTGCCACTTTGTTTCGTCAGTTTGAGATATTTAATTGTGCTATGGTTAATTTT
Ro06-8524146	Ro06	8524146	C	T	GTCCAGCTTCCAACGTATATGAGCCACCATCTAGCAGATCTAATTCAGGGTTTTCTTCTGGGTATGGCCCTCCATCTGGGCTTAATGAACCATATCACTA[C/T]GGTGGATCACCTTCTCAATATGGTGGTACCTCTTCAATGAAACCACAACTCTCTGCTGTTACTGCTCAAAGTCAAAGTGGAGGAAGTGGTTACCCACAGC
Ro06-8529188	Ro06	8529188	C	T	AAACATTAAAAGCTAGGGATGAAAACTTCATTTGGAAGATGAACTGGCTAACATGTGCAACCATATGGCTCAACAATATTCATTTTGATATGCTTGCTAT[C/T]TGTCCTTTGCAGCCATTGAAATTCTCGTGAGTACCTGAGAATGTCTCTTTTCTCTTTGATGACAGGAAACAGAAGTCTCTGCTGTTAAATATATATCTTA
Ro06-8536353	Ro06	8536353	T	C	TAGTTTGAAAACCTGTTTAGATTTGTGCGTCTGTGTGTGTGTGCATATTTTAGGCCAAACAGTGTTATGATTCTTCGTTGCAATTAGACATGTGATGATG[T/C]GATGGMAACCTAAGTAGTTTTGTGAAGACGTGTTGTATTTGTATTGTTGAGGCAATGTCATCTAGTTTTGTGGTGAGACACCATGCTCACCACAATCAAC
Ro06-8536359	Ro06	8536359	C	A	GAAAACCTGTTTAGATTTGTGCGTCTGTGTGTGTGTGCATATTTTAGGCCAAACAGTGTTATGATTCTTCGTTGCAATTAGACATGTGATGATGYGATGG[C/A]AACCTAAGTAGTTTTGTGAAGACGTGTTGTATTTGTATTGTTGAGGCAATGTCATCTAGTTTTGTGGTGAGACACCATGCTCACCACAATCAACTTTTGA
Ro06-8539608	Ro06	8539608	C	G	TCTCATGGATTAAATGCTAACATATCTTCATTATGATTGAGTACCCCAATTTCTTACTTATTACTACTTTGTGAAACATTTATATGATCATAATAATTTG[C/G]GCAGCATCTATATATGTTTGAACTAATAGCATATAGTACTTTAAAAATGATATCTAGYTARCTAGGGTTTCTATACATGTTCGATGTTTTGGTCTAAATG
Ro06-8539666	Ro06	8539666	C	T	TATTACTACTTTGTGAAACATTTATATGATCATAATAATTTGSGCAGCATCTATATATGTTTGAACTAATAGCATATAGTACTTTAAAAATGATATCTAG[C/T]TARCTAGGGTTTCTATACATGTTCGATGTTTTGGTCTAAATGGGTCAGAAGATCGATATATGTTAGATTATACATTCATGAATAGAACACACGTCCTTTT
Ro06-8539669	Ro06	8539669	A	G	TACTACTTTGTGAAACATTTATATGATCATAATAATTTGSGCAGCATCTATATATGTTTGAACTAATAGCATATAGTACTTTAAAAATGATATCTAGYTA[A/G]CTAGGGTTTCTATACATGTTCGATGTTTTGGTCTAAATGGGTCAGAAGATCGATATATGTTAGATTATACATTCATGAATAGAACACACGTCCTTTTTAT
Ro06-8541182	Ro06	8541182	C	T	GTCGTATAACTGTCATATATATGTATATATATATATATATATTCCAAAGCATGCATCCTAAGATTAACAAAATCAATAATCACTAAGCTATATATGTATA[C/T]ATAGACATACATATAATTAAACTCATAGCAATAAGTGTACGCTAATACAAACATATTATATAGTGCAACAAATTATATGCTTTTATTCGTAGAAAAAAAG
Ro06-8564094	Ro06	8564094	C	T	GATGAATGATGATTACATTTTAATTGCAGGGGAATCGTCCTAGTTCATTGAGCAAACAGTCTAAATCACTTCTTGCTGCTGTATCGTAAGCCTTTTCCTC[C/T]CTCCCCTCTCACACACTCAAACATGTGTGTGCACACACATTTAAYATTCAACTTGTAATACTTACGTACCCTTTGTTTTTGCAGGTTCACGCCCACAATT
Ro06-8564139	Ro06	8564139	C	T	CATTGAGCAAACAGTCTAAATCACTTCTTGCTGCTGTATCGTAAGCCTTTTCCTCYCTCCCCTCTCACACACTCAAACATGTGTGTGCACACACATTTAA[C/T]ATTCAACTTGTAATACTTACGTACCCTTTGTTTTTGCAGGTTCACGCCCACAATTTCGACTTGGACAGGAAGTTACAGACGTATAAGGGCATATGTAGCC
Ro06-8591421	Ro06	8591421	T	G	TGGATCAGTAGTCAAGTACACGGATTTAAAAGGAAAAAGGAAAGTAATTTGTCATGTTCAGCACTTAATGATGGCATGCATCACAGAGTATATCCACGAT[T/G]TAGGTTATGTGTGAGTGTGCTGAATGTTTGTAAAAGAAAACAATAATTGGGAAGGTAAATAAGATCACTTTGTATTTTTTTGCAGTATTACCTGAAATTT
Ro06-8591891	Ro06	8591891	G	C	ACTTCTTCAATTGGGGCACTGGTGGGATTCTCGCTTAGTGGATTTTTTGTTCACCTATTAGGGCCTAAGGTTTGCTTCTGCTCAAGTTCCTTTACATCTT[G/C]TTACGTTGTGACAATAGAAACTTTGGCATTGTTTGARTGTGTTTTCATATCATTGCTCAAGCCCTAAGGGTAATCCTTTGGCTTATAATTTGGGCATGTC
Ro06-8591928	Ro06	8591928	G	A	GTGGATTTTTTGTTCACCTATTAGGGCCTAAGGTTTGCTTCTGCTCAAGTTCCTTTACATCTTSTTACGTTGTGACAATAGAAACTTTGGCATTGTTTGA[G/A]TGTGTTTTCATATCATTGCTCAAGCCCTAAGGGTAATCCTTTGGCTTATAATTTGGGCATGTCTAGAGATGCTTGTCCAAGTTTCAATATAGCAAGATGT
Ro06-8619246	Ro06	8619246	A	G	TGACTATTATTTTGCATGAATTATATTAAAAGAGATACCTATAAAATAGGTAGTTCGGATCGTCAAGCTTTGTTTTTTATTTTTTAAGTGAGCTTCCTCA[A/G]TGRAGAATGCATGTATATATATAAACACACACACAAAGATTTCTAAGTAATGCATAACAAATTATCGACCAAAGATATTTTTTTAATTATTTTAAATAAA
Ro06-8619249	Ro06	8619249	A	G	CTATTATTTTGCATGAATTATATTAAAAGAGATACCTATAAAATAGGTAGTTCGGATCGTCAAGCTTTGTTTTTTATTTTTTAAGTGAGCTTCCTCARTG[A/G]AGAATGCATGTATATATATAAACACACACACAAAGATTTCTAAGTAATGCATAACAAATTATCGACCAAAGATATTTTTTTAATTATTTTAAATAAAATT
Ro06-8672731	Ro06	8672731	A	G	ACTGCCCCTGAAGACTCAGCTCATCTTCTTGTTCATGACCACTCATTTTCATGTCCTTATAGTAGTACTCTTCTATAGTTATGCATACTACTTCAATTAT[A/G]AGGGTTTGGCACACAGCAGCTCAGTCGCTCTCGAGTCGTACGCTAACTCAATCCCTAATCTCTCCAWATCCAAACCTTGAAATAAGTCCACATGTCACAA
Ro06-8672798	Ro06	8672798	T	A	CTCTTCTATAGTTATGCATACTACTTCAATTATRAGGGTTTGGCACACAGCAGCTCAGTCGCTCTCGAGTCGTACGCTAACTCAATCCCTAATCTCTCCA[T/A]ATCCAAACCTTGAAATAAGTCCACATGTCACAACTACATCAACTTTAAATCACTGCTAGGCTCTACAATATGGCAATGATGTATAAGCTCATATCTATCC
Ro06-8681598	Ro06	8681598	A	C	CTCCACACCTTAAAAAGTAAGGATATCCTTAGCAAAAAAGACATGTATATATATATATAGATGCCCTTCACATGTGGACGTCCAGACGTGAATTACAATG[A/C]AAAYATYTTTATCCCGACTAATTGACAACATAACTCAATCATCAGAACCGTTCATCGTTTAGATTTATTTCYAAGAATTATCCTTACAAAAAATCAGCMG
Ro06-8681602	Ro06	8681602	C	T	ACACCTTAAAAAGTAAGGATATCCTTAGCAAAAAAGACATGTATATATATATATAGATGCCCTTCACATGTGGACGTCCAGACGTGAATTACAATGMAAA[C/T]ATYTTTATCCCGACTAATTGACAACATAACTCAATCATCAGAACCGTTCATCGTTTAGATTTATTTCYAAGAATTATCCTTACAAAAAATCAGCMGAATT
Ro06-8681605	Ro06	8681605	C	T	CCTTAAAAAGTAAGGATATCCTTAGCAAAAAAGACATGTATATATATATATAGATGCCCTTCACATGTGGACGTCCAGACGTGAATTACAATGMAAAYAT[C/T]TTTATCCCGACTAATTGACAACATAACTCAATCATCAGAACCGTTCATCGTTTAGATTTATTTCYAAGAATTATCCTTACAAAAAATCAGCMGAATTGGA
Ro06-8681670	Ro06	8681670	C	T	TGTGGACGTCCAGACGTGAATTACAATGMAAAYATYTTTATCCCGACTAATTGACAACATAACTCAATCATCAGAACCGTTCATCGTTTAGATTTATTTC[C/T]AAGAATTATCCTTACAAAAAATCAGCMGAATTGGAGATTGTTTGGTCATCTGTTCGGTGTATAGTTTACAGACAAATACAGTCCGTCAGATAAAGCTAAA
Ro06-8681697	Ro06	8681697	C	A	GMAAAYATYTTTATCCCGACTAATTGACAACATAACTCAATCATCAGAACCGTTCATCGTTTAGATTTATTTCYAAGAATTATCCTTACAAAAAATCAGC[C/A]GAATTGGAGATTGTTTGGTCATCTGTTCGGTGTATAGTTTACAGACAAATACAGTCCGTCAGATAAAGCTAAAACGACGAATGTGGTAATCAAATGGCTA
Ro06-8691653	Ro06	8691653	A	G	AGGCGACACACGCTGATAATCGGGGATCATCCAAGTGACTCTGTTGCTTGAGTTCATCTCTATGATGCCGATGAATTTGCGCAATATTGGTTTTTCTGTC[A/G]CGGAAATAGACAYAATTCAAACACAATCAAAATCTTAATTGTAATTAACTCGTGATAAGGRACAGATGCGATGAGGGASATGGAAACATGGTTAATTTAC
Ro06-8691666	Ro06	8691666	T	C	TGATAATCGGGGATCATCCAAGTGACTCTGTTGCTTGAGTTCATCTCTATGATGCCGATGAATTTGCGCAATATTGGTTTTTCTGTCRCGGAAATAGACA[T/C]AATTCAAACACAATCAAAATCTTAATTGTAATTAACTCGTGATAAGGRACAGATGCGATGAGGGASATGGAAACATGGTTAATTTACAATCATATGAATA
Ro06-8691714	Ro06	8691714	G	A	ATGATGCCGATGAATTTGCGCAATATTGGTTTTTCTGTCRCGGAAATAGACAYAATTCAAACACAATCAAAATCTTAATTGTAATTAACTCGTGATAAGG[G/A]ACAGATGCGATGAGGGASATGGAAACATGGTTAATTTACAATCATATGAATATAAGCGCGCATGTTAATATTATCTGCTGTTATAGGCCTTGCTTGAGCA
Ro06-8691732	Ro06	8691732	G	C	CGCAATATTGGTTTTTCTGTCRCGGAAATAGACAYAATTCAAACACAATCAAAATCTTAATTGTAATTAACTCGTGATAAGGRACAGATGCGATGAGGGA[G/C]ATGGAAACATGGTTAATTTACAATCATATGAATATAAGCGCGCATGTTAATATTATCTGCTGTTATAGGCCTTGCTTGAGCAGCACAAGAGGTGTAAACA
Ro06-8707809	Ro06	8707809	A	C	GTGACTCGAATCTATAACCTGCATTTTAGGTAATGGGTGTTCTAACCACTGAGCTACTCGTTCATCCTTTACGAAAATGAATAAAATATACATGTATAAT[A/C]TTCATCATGCACTATGCCGTAGAGATGTCTTGCATGGTCAAATTTGMSAAATCAWACTGTCATTCATGGTCGTCTATGGCTGCYGTTCTATATTTCATAA
Ro06-8707856	Ro06	8707856	A	C	ACTGAGCTACTCGTTCATCCTTTACGAAAATGAATAAAATATACATGTATAATMTTCATCATGCACTATGCCGTAGAGATGTCTTGCATGGTCAAATTTG[A/C]SAAATCAWACTGTCATTCATGGTCGTCTATGGCTGCYGTTCTATATTTCATAAAACATATGAATTGAATTARGGTTTGAAGAAAAACCTAAAAGGAAGAA
Ro06-8707857	Ro06	8707857	G	C	CTGAGCTACTCGTTCATCCTTTACGAAAATGAATAAAATATACATGTATAATMTTCATCATGCACTATGCCGTAGAGATGTCTTGCATGGTCAAATTTGM[G/C]AAATCAWACTGTCATTCATGGTCGTCTATGGCTGCYGTTCTATATTTCATAAAACATATGAATTGAATTARGGTTTGAAGAAAAACCTAAAAGGAAGAAT
Ro06-8707864	Ro06	8707864	A	T	ACTCGTTCATCCTTTACGAAAATGAATAAAATATACATGTATAATMTTCATCATGCACTATGCCGTAGAGATGTCTTGCATGGTCAAATTTGMSAAATCA[A/T]ACTGTCATTCATGGTCGTCTATGGCTGCYGTTCTATATTTCATAAAACATATGAATTGAATTARGGTTTGAAGAAAAACCTAAAAGGAAGAATTACTATT
Ro06-8707893	Ro06	8707893	T	C	AATATACATGTATAATMTTCATCATGCACTATGCCGTAGAGATGTCTTGCATGGTCAAATTTGMSAAATCAWACTGTCATTCATGGTCGTCTATGGCTGC[T/C]GTTCTATATTTCATAAAACATATGAATTGAATTARGGTTTGAAGAAAAACCTAAAAGGAAGAATTACTATTGGGTAAGATGGTATTTTTTTTGTTTGTAA
Ro06-8707928	Ro06	8707928	A	G	GTAGAGATGTCTTGCATGGTCAAATTTGMSAAATCAWACTGTCATTCATGGTCGTCTATGGCTGCYGTTCTATATTTCATAAAACATATGAATTGAATTA[A/G]GGTTTGAAGAAAAACCTAAAAGGAAGAATTACTATTGGGTAAGATGGTATTTTTTTTGTTTGTAAGGTAAGATGGTATTTTTTATTATACATTAATATGT
Ro06-8721456	Ro06	8721456	G	A	TATAGCTAGGTTTGAACGTTCGGGAATCAAAAATTCTGAGAGTAGCACAAATTGATTTTCATGCATGCTATATTAGCAAGTTATATACCAAAACAAGTAC[G/A]TACAATGATTTCGGTTCACCTCTTGGTTGAACGAGCAGGTTCACTCACTTTTGTAATTATCATATTTTCGACTTACATTTTTCATATATAATCCAAACCA
Ro06-8731470	Ro06	8731470	G	A	AGCAGCTTTATTAGTTCTTAAATTCTTACCCGGTAGAACAATATACAAATGCCAATTGTACAAATTGAGTTTCCAAGATGTACATGTAGCTAGATGCATG[G/A]ATAGGTATTTTTCGACTTCAATATCTACAAGGAGTGAGGGACAGAGAGTACATTCAATTAATTCGAAAAGATGGAAAACTATCAATTGATAACAATAATG
Ro06-8761870	Ro06	8761870	C	G	TCATGCTAATGTAGTCAACGAATCAAGCCTTATATCCTAGCCATATTATGGGTCTAGAACCATGTTCCTAAGGTATTAAAATGTCATATTATGGGTCATT[C/G]CAACTCTCTAGGTGYCATAGRGGATTYCTCTACGTTACCTAATAYCGAATCCCCTAAAGTGRTTARRAGGCGTAAARTGTCGAACCTAGGGACTCAAACA
Ro06-8761885	Ro06	8761885	T	C	CAACGAATCAAGCCTTATATCCTAGCCATATTATGGGTCTAGAACCATGTTCCTAAGGTATTAAAATGTCATATTATGGGTCATTSCAACTCTCTAGGTG[T/C]CATAGRGGATTYCTCTACGTTACCTAATAYCGAATCCCCTAAAGTGRTTARRAGGCGTAAARTGTCGAACCTAGGGACTCAAACAAAYAACACATGCATA
Ro06-8761891	Ro06	8761891	G	A	ATCAAGCCTTATATCCTAGCCATATTATGGGTCTAGAACCATGTTCCTAAGGTATTAAAATGTCATATTATGGGTCATTSCAACTCTCTAGGTGYCATAG[G/A]GGATTYCTCTACGTTACCTAATAYCGAATCCCCTAAAGTGRTTARRAGGCGTAAARTGTCGAACCTAGGGACTCAAACAAAYAACACATGCATAACCCAC
Ro06-8761897	Ro06	8761897	C	T	CCTTATATCCTAGCCATATTATGGGTCTAGAACCATGTTCCTAAGGTATTAAAATGTCATATTATGGGTCATTSCAACTCTCTAGGTGYCATAGRGGATT[C/T]CTCTACGTTACCTAATAYCGAATCCCCTAAAGTGRTTARRAGGCGTAAARTGTCGAACCTAGGGACTCAAACAAAYAACACATGCATAACCCACCACTCC
Ro06-8761915	Ro06	8761915	C	T	TTATGGGTCTAGAACCATGTTCCTAAGGTATTAAAATGTCATATTATGGGTCATTSCAACTCTCTAGGTGYCATAGRGGATTYCTCTACGTTACCTAATA[C/T]CGAATCCCCTAAAGTGRTTARRAGGCGTAAARTGTCGAACCTAGGGACTCAAACAAAYAACACATGCATAACCCACCACTCCACCGATATTATTGATATG
Ro06-8761932	Ro06	8761932	G	A	TGTTCCTAAGGTATTAAAATGTCATATTATGGGTCATTSCAACTCTCTAGGTGYCATAGRGGATTYCTCTACGTTACCTAATAYCGAATCCCCTAAAGTG[G/A]TTARRAGGCGTAAARTGTCGAACCTAGGGACTCAAACAAAYAACACATGCATAACCCACCACTCCACCGATATTATTGATATGGAGTGGATTCCTTCTAA
Ro06-8761936	Ro06	8761936	A	G	CCTAAGGTATTAAAATGTCATATTATGGGTCATTSCAACTCTCTAGGTGYCATAGRGGATTYCTCTACGTTACCTAATAYCGAATCCCCTAAAGTGRTTA[A/G]RAGGCGTAAARTGTCGAACCTAGGGACTCAAACAAAYAACACATGCATAACCCACCACTCCACCGATATTATTGATATGGAGTGGATTCCTTCTAAGGTA
Ro06-8761937	Ro06	8761937	G	A	CTAAGGTATTAAAATGTCATATTATGGGTCATTSCAACTCTCTAGGTGYCATAGRGGATTYCTCTACGTTACCTAATAYCGAATCCCCTAAAGTGRTTAR[G/A]AGGCGTAAARTGTCGAACCTAGGGACTCAAACAAAYAACACATGCATAACCCACCACTCCACCGATATTATTGATATGGAGTGGATTCCTTCTAAGGTAT
Ro06-8761947	Ro06	8761947	G	A	AAAATGTCATATTATGGGTCATTSCAACTCTCTAGGTGYCATAGRGGATTYCTCTACGTTACCTAATAYCGAATCCCCTAAAGTGRTTARRAGGCGTAAA[G/A]TGTCGAACCTAGGGACTCAAACAAAYAACACATGCATAACCCACCACTCCACCGATATTATTGATATGGAGTGGATTCCTTCTAAGGTATTCCTAAGCCT
Ro06-8761973	Ro06	8761973	C	T	ACTCTCTAGGTGYCATAGRGGATTYCTCTACGTTACCTAATAYCGAATCCCCTAAAGTGRTTARRAGGCGTAAARTGTCGAACCTAGGGACTCAAACAAA[C/T]AACACATGCATAACCCACCACTCCACCGATATTATTGATATGGAGTGGATTCCTTCTAAGGTATTCCTAAGCCTTATTAGGGTCTTAGGAACTCTCCATG
Ro06-8785006	Ro06	8785006	A	G	TTTTAATTCCAACTACTAAATGGGGTCCAAAATGCAGCTCCAAGACATCCATATCTCAACATTTCTCTTGTTACTCCATTGATTAAGTTAATAATTCCTT[A/G]TATGCAGAGTATGGATTTGGATCAAACACATCTACAAAAGGCGATGTTTACAGCTTTGGCATTCTGGTTCTAGAGATGGTGACAAGAAAAAGGCCAATAG
Ro06-8785634	Ro06	8785634	T	G	TAGGATCTCTTACATTCTTGTCAAGGATGAGAACAAGTAGCTCAGTCATTAGACAAACATAGTTAAATGTGAGTCCAATTATGGGACAAGTCATTATTCA[T/G]CATCAGTCATCATAGGTGATGATGATGATTAGTACAGGATTCTGATAAAACTGAAAACCAAGAGTCACAACCTAGTAAAAACACATAGCATGCGTACGGT
Ro06-8791634	Ro06	8791634	A	T	ACTCCACCACATTTGAAATATGTGACCTGCAAAGAGAAAAATCCAGGACCATACTTGTTAGCTTAATTCCCAACTCAAGTTAAAATTTGGCATATTATTT[A/T]TGATWGACCMWAYAGTGTGCTTCGATCGCGAGGAAACTGAAGATGGGTGAATACTTGAAATTGTATGATACTATGATGAACTCAAAACTGTTTTCTAATT
Ro06-8791639	Ro06	8791639	A	T	ACCACATTTGAAATATGTGACCTGCAAAGAGAAAAATCCAGGACCATACTTGTTAGCTTAATTCCCAACTCAAGTTAAAATTTGGCATATTATTTWTGAT[A/T]GACCMWAYAGTGTGCTTCGATCGCGAGGAAACTGAAGATGGGTGAATACTTGAAATTGTATGATACTATGATGAACTCAAAACTGTTTTCTAATTCTAAA
Ro06-8791644	Ro06	8791644	C	A	ATTTGAAATATGTGACCTGCAAAGAGAAAAATCCAGGACCATACTTGTTAGCTTAATTCCCAACTCAAGTTAAAATTTGGCATATTATTTWTGATWGACC[C/A]WAYAGTGTGCTTCGATCGCGAGGAAACTGAAGATGGGTGAATACTTGAAATTGTATGATACTATGATGAACTCAAAACTGTTTTCTAATTCTAAACCCCA
Ro06-8791645	Ro06	8791645	A	T	TTTGAAATATGTGACCTGCAAAGAGAAAAATCCAGGACCATACTTGTTAGCTTAATTCCCAACTCAAGTTAAAATTTGGCATATTATTTWTGATWGACCM[A/T]AYAGTGTGCTTCGATCGCGAGGAAACTGAAGATGGGTGAATACTTGAAATTGTATGATACTATGATGAACTCAAAACTGTTTTCTAATTCTAAACCCCAA
Ro06-8791647	Ro06	8791647	C	T	TGAAATATGTGACCTGCAAAGAGAAAAATCCAGGACCATACTTGTTAGCTTAATTCCCAACTCAAGTTAAAATTTGGCATATTATTTWTGATWGACCMWA[C/T]AGTGTGCTTCGATCGCGAGGAAACTGAAGATGGGTGAATACTTGAAATTGTATGATACTATGATGAACTCAAAACTGTTTTCTAATTCTAAACCCCAAAA
Ro06-8876813	Ro06	8876813	T	G	TCAAAGTTAAGCCATCTATATATTCAAGTAAAACACTCCATCGTTTTGTAGAATTAGAAAACACAGTATAGATGGTTTGACATGCTCCAAAAAAAGATTT[T/G]KCTTTAAGACAAGAATTCGCCATATCACAAAGTACTAAATTAAGGGAATGACAACCACATGGCATATAAAAYGCTCTAGGATTTATATCAAKAAATCTTT
Ro06-8876814	Ro06	8876814	G	T	CAAAGTTAAGCCATCTATATATTCAAGTAAAACACTCCATCGTTTTGTAGAATTAGAAAACACAGTATAGATGGTTTGACATGCTCCAAAAAAAGATTTK[G/T]CTTTAAGACAAGAATTCGCCATATCACAAAGTACTAAATTAAGGGAATGACAACCACATGGCATATAAAAYGCTCTAGGATTTATATCAAKAAATCTTTT
Ro06-8876885	Ro06	8876885	C	T	TGGTTTGACATGCTCCAAAAAAAGATTTKKCTTTAAGACAAGAATTCGCCATATCACAAAGTACTAAATTAAGGGAATGACAACCACATGGCATATAAAA[C/T]GCTCTAGGATTTATATCAAKAAATCTTTTTTGAATACCTTGGTGTTTTCCTTTCATATTAGATCCATTATCATAGCCTTGTCCTCTCACACAGTCAATAT
Ro06-8876905	Ro06	8876905	G	T	AAAGATTTKKCTTTAAGACAAGAATTCGCCATATCACAAAGTACTAAATTAAGGGAATGACAACCACATGGCATATAAAAYGCTCTAGGATTTATATCAA[G/T]AAATCTTTTTTGAATACCTTGGTGTTTTCCTTTCATATTAGATCCATTATCATAGCCTTGTCCTCTCACACAGTCAATATCTAAATCAAGGGACTTTAAA
Ro06-8908439	Ro06	8908439	C	T	GGTTTATAATAGACTTCAGAAATATTCATTTAAGAGACAAGATCTTGAATTTTACTAACAATAATACTATGAGCAACGAAAGAGTACTCTTGTTTGTTGA[C/T]TATATTCACCACCTCAAAACAATCAGATTTCATAATTAGATGATAGAAAGAACTATCAAGAGCAAACTCTAAGCATGTTTTAAGCACAAAAAGTTTAGTA
Ro06-8928100	Ro06	8928100	T	C	TGATTTCCGGAACCTGTATCACCATTTCTTCCCGCATGTTCTTGTCCGGTATTTTGAAGACTTTTCAATTTGGCCTCCAACTTCAACAATTCAGACTTCA[T/C]RAAAGTGTATGAATGCCTGTTCTTTGCACCMTCTGATGTGATTCTATGKGCTATTTGACATAACTCGCCATATTGAGCCATGGGAGATGAGTCCCGATTA
Ro06-8928101	Ro06	8928101	G	A	GATTTCCGGAACCTGTATCACCATTTCTTCCCGCATGTTCTTGTCCGGTATTTTGAAGACTTTTCAATTTGGCCTCCAACTTCAACAATTCAGACTTCAY[G/A]AAAGTGTATGAATGCCTGTTCTTTGCACCMTCTGATGTGATTCTATGKGCTATTTGACATAACTCGCCATATTGAGCCATGGGAGATGAGTCCCGATTAT
Ro06-8928131	Ro06	8928131	C	A	CCGCATGTTCTTGTCCGGTATTTTGAAGACTTTTCAATTTGGCCTCCAACTTCAACAATTCAGACTTCAYRAAAGTGTATGAATGCCTGTTCTTTGCACC[C/A]TCTGATGTGATTCTATGKGCTATTTGACATAACTCGCCATATTGAGCCATGGGAGATGAGTCCCGATTATACAAAACATGTGAACTCGATGCAGGAGCAA
Ro06-8928149	Ro06	8928149	G	T	TATTTTGAAGACTTTTCAATTTGGCCTCCAACTTCAACAATTCAGACTTCAYRAAAGTGTATGAATGCCTGTTCTTTGCACCMTCTGATGTGATTCTATG[G/T]GCTATTTGACATAACTCGCCATATTGAGCCATGGGAGATGAGTCCCGATTATACAAAACATGTGAACTCGATGCAGGAGCAAGACCATGAGTGTGTTCAG
Ro06-8936803	Ro06	8936803	C	A	TTAAAAGCACTCAAACTTGCAGGTGCTAGTTTCACCGGATCTGTTCCTCCCCAACTGGGGAATCTCTCTAATTTGCATACCCTTGATCTTGCATGGAATG[C/A]TGTAACTTTTGAAAATCTCCAGTGGTCAACTCATCTTTMTTCCTTGAGATACTTGAACATGTCGCGTCTAAATTTTTCTTAGATGGTAAATTGGCCACAA
Ro06-8936842	Ro06	8936842	C	A	TCTGTTCCTCCCCAACTGGGGAATCTCTCTAATTTGCATACCCTTGATCTTGCATGGAATGMTGTAACTTTTGAAAATCTCCAGTGGTCAACTCATCTTT[C/A]TTCCTTGAGATACTTGAACATGTCGCGTCTAAATTTTTCTTAGATGGTAAATTGGCCACAATATATGAGCCAGCTTCCATCACTGATAGAGCTTCAGTTA
Ro06-8937899	Ro06	8937899	A	C	GCAGAGAGAACTTACTTCTCTTTATATGTCCAATGCAGGTATTTCAGATTCAGTACCTATTAAGTTTTGGGATCTATCTTCGAGCTTACTTGACTTAAAT[A/C]TCTCCATGAACCAAATCCATGGGGAAKTACCTGATCTATCATAAAAAAACTGCACCTACTTTACATTTGACTTGTCATCCAAYCACTTGTTTGGTCCACT
Ro06-8937926	Ro06	8937926	G	T	GTCCAATGCAGGTATTTCAGATTCAGTACCTATTAAGTTTTGGGATCTATCTTCGAGCTTACTTGACTTAAATMTCTCCATGAACCAAATCCATGGGGAA[G/T]TACCTGATCTATCATAAAAAAACTGCACCTACTTTACATTTGACTTGTCATCCAAYCACTTGTTTGGTCCACTCCCCCCATTCCCTCCGAATGTAAGCAT
Ro06-8937982	Ro06	8937982	C	T	GCTTACTTGACTTAAATMTCTCCATGAACCAAATCCATGGGGAAKTACCTGATCTATCATAAAAAAACTGCACCTACTTTACATTTGACTTGTCATCCAA[C/T]CACTTGTTTGGTCCACTCCCCCCATTCCCTCCGAATGTAAGCATCCTGCTTCTCTCYAAAAACATGTTTTCAGGACCTTTATCTTCCTTTTGTGCAGCAG
Ro06-8938039	Ro06	8938039	T	C	CATAAAAAAACTGCACCTACTTTACATTTGACTTGTCATCCAAYCACTTGTTTGGTCCACTCCCCCCATTCCCTCCGAATGTAAGCATCCTGCTTCTCTC[T/C]AAAAACATGTTTTCAGGACCTTTATCTTCCTTTTGTGCAGCAGAAGCTCAGAAATTGTTGAATCTCGACCTTTCTGACAACTTACTATCAGGGGAACTTC
Ro06-8942955	Ro06	8942955	T	C	TTTAATTATAGTATAAGCTAGCCTATACACCTCCAATTGCACATGCTCTTAGTGTCAAAATAGCTCAAGTGTCAAACCAAGTGCTAAACTCAGTCTGGGA[T/C]TGAGACTGGAACCGGTGCCATAATTTCTGGGCGGGCTCCACATAATATTGTTGTGATGATGCATGAAGAGAGGTGTTGAGGACGGTTTGATACTGAGTTT
Ro06-8948865	Ro06	8948865	G	A	CACCATATTCTGGAGCAACATAACACAAAGTCCCTCTCATACTTGTTGTGCTGCTTAGCTCACGGCTAAATAGATCACCACTCCACATGTCACTGCCAAC[G/A]GAACGTGCATTCTTTTTCTTCCATCCCCTTCTGAAACTGAACTCACCATTGTGATCACACTTGTCTTGACTTTGTTCCCTAAAGTTCTTTCTCCTACGAA
Ro06-8968603	Ro06	8968603	A	T	CCTCTCGGGTGTTCGGAAGAGGTGAACTTGTGATAGATTCTTCAGAGATAGCACAGCGATATCTACACCGTTACTTCTTTGTTGATCTTGCTTCCGTGCT[A/T]CCCTTACCGCAGGTTAGAAACTAAACACCATGCTCATTGTACTAGTTTGCATGCATTTATGAAAAGAAAAGCATTTATATAATTTCTTCCTCCAAATCTG
Ro06-8983392	Ro06	8983392	G	A	ACTGAGATCTTATAATATAATTTACACCCTGATACATGTTTAACTCATCTGCATAAACTGTATATCATTGGTCAAAGAAACTGTCAGGACGGCCTATATT[G/A]TTGATGTAATTGCAGTTGATGTGTTAGGCTATGATCATACCTGAATCCCAAAGGCAATTACAWCTTTTACTTTCCAATAYCCTGTAGATCATACTCTGGG
Ro06-8983455	Ro06	8983455	T	A	ATCATTGGTCAAAGAAACTGTCAGGACGGCCTATATTRTTGATGTAATTGCAGTTGATGTGTTAGGCTATGATCATACCTGAATCCCAAAGGCAATTACA[T/A]CTTTTACTTTCCAATAYCCTGTAGATCATACTCTGGGGATGCATCAGTGTGTGCGTGTGTTTGTGTGTGTGTTTCTTTTTTTATTTATTTTTTATTTTTT
Ro06-8983472	Ro06	8983472	C	T	CTGTCAGGACGGCCTATATTRTTGATGTAATTGCAGTTGATGTGTTAGGCTATGATCATACCTGAATCCCAAAGGCAATTACAWCTTTTACTTTCCAATA[C/T]CCTGTAGATCATACTCTGGGGATGCATCAGTGTGTGCGTGTGTTTGTGTGTGTGTTTCTTTTTTTATTTATTTTTTATTTTTTGATAATGTAAAGTATTC
Ro06-8993485	Ro06	8993485	G	A	AAATTTTGTGTTTCTTTATTGTACAGGCAATAACTTCTGCTGATACAATAATTGTTATGGAAAAAGGACATGTAAAGTGGGTGGGACGTTCAACTTGTTT[G/A]CCAGTTTCTTCATATTCAGCATTCTCTCCACTGAATGAATTTGATAAATTGTTACTCAATGAAAGAAAAGAGTGCAATGTAACTGCAGATACTCTCACAA
Ro06-9022996	Ro06	9022996	A	G	CTGACATGGTTATTTTCATTGAGCATCTCTCAGTCTCTCTTTATATTTCTCTAGTTTCTTGTTTATTAATCTTAAAATTTATGATGTATACTCTAAATAT[A/G]TGTGAGTAGTTGCTTAKGATTAAWGACTAGGRTTATGTRYYTCGGTCCATTGATGATGRATTGAGCAAATAATGATGTRTATGCATGTTTGTTGATAATT
Ro06-9023013	Ro06	9023013	G	T	ATTGAGCATCTCTCAGTCTCTCTTTATATTTCTCTAGTTTCTTGTTTATTAATCTTAAAATTTATGATGTATACTCTAAATATRTGTGAGTAGTTGCTTA[G/T]GATTAAWGACTAGGRTTATGTRYYTCGGTCCATTGATGATGRATTGAGCAAATAATGATGTRTATGCATGTTTGTTGATAATTGGATATGCTTGTTGCCT
Ro06-9023020	Ro06	9023020	A	T	ATCTCTCAGTCTCTCTTTATATTTCTCTAGTTTCTTGTTTATTAATCTTAAAATTTATGATGTATACTCTAAATATRTGTGAGTAGTTGCTTAKGATTAA[A/T]GACTAGGRTTATGTRYYTCGGTCCATTGATGATGRATTGAGCAAATAATGATGTRTATGCATGTTTGTTGATAATTGGATATGCTTGTTGCCTATTTTAA
Ro06-9023028	Ro06	9023028	G	A	GTCTCTCTTTATATTTCTCTAGTTTCTTGTTTATTAATCTTAAAATTTATGATGTATACTCTAAATATRTGTGAGTAGTTGCTTAKGATTAAWGACTAGG[G/A]TTATGTRYYTCGGTCCATTGATGATGRATTGAGCAAATAATGATGTRTATGCATGTTTGTTGATAATTGGATATGCTTGTTGCCTATTTTAATGTGTTAA
Ro06-9023035	Ro06	9023035	A	G	TTTATATTTCTCTAGTTTCTTGTTTATTAATCTTAAAATTTATGATGTATACTCTAAATATRTGTGAGTAGTTGCTTAKGATTAAWGACTAGGRTTATGT[A/G]YYTCGGTCCATTGATGATGRATTGAGCAAATAATGATGTRTATGCATGTTTGTTGATAATTGGATATGCTTGTTGCCTATTTTAATGTGTTAATTAGATG
Ro06-9023036	Ro06	9023036	T	C	TTATATTTCTCTAGTTTCTTGTTTATTAATCTTAAAATTTATGATGTATACTCTAAATATRTGTGAGTAGTTGCTTAKGATTAAWGACTAGGRTTATGTR[T/C]YTCGGTCCATTGATGATGRATTGAGCAAATAATGATGTRTATGCATGTTTGTTGATAATTGGATATGCTTGTTGCCTATTTTAATGTGTTAATTAGATGC
Ro06-9023037	Ro06	9023037	T	C	TATATTTCTCTAGTTTCTTGTTTATTAATCTTAAAATTTATGATGTATACTCTAAATATRTGTGAGTAGTTGCTTAKGATTAAWGACTAGGRTTATGTRY[T/C]TCGGTCCATTGATGATGRATTGAGCAAATAATGATGTRTATGCATGTTTGTTGATAATTGGATATGCTTGTTGCCTATTTTAATGTGTTAATTAGATGCT
Ro06-9023055	Ro06	9023055	G	A	TGTTTATTAATCTTAAAATTTATGATGTATACTCTAAATATRTGTGAGTAGTTGCTTAKGATTAAWGACTAGGRTTATGTRYYTCGGTCCATTGATGATG[G/A]ATTGAGCAAATAATGATGTRTATGCATGTTTGTTGATAATTGGATATGCTTGTTGCCTATTTTAATGTGTTAATTAGATGCTTGCTTAAACACATGTAAA
Ro06-9023075	Ro06	9023075	G	A	TATGATGTATACTCTAAATATRTGTGAGTAGTTGCTTAKGATTAAWGACTAGGRTTATGTRYYTCGGTCCATTGATGATGRATTGAGCAAATAATGATGT[G/A]TATGCATGTTTGTTGATAATTGGATATGCTTGTTGCCTATTTTAATGTGTTAATTAGATGCTTGCTTAAACACATGTAAAAATTTATGAGGTTGTGTTTA
Ro06-9026025	Ro06	9026025	C	G	CTTGTTCTTTCCTCCCAAGTCTCCACCAATGACTCTACTTGTTTTCCTAGCCTTTTGCATCAGTCCTCACAGCCATCTCTATCTTCTACTCCATTATTTT[C/G]ATCTCAATTTCAACCCATGCACTCAGTTTAAAAGCCAGCATGTTGTGCTTGAAGAATTCTCTGCATTGCTAGCAAAGGACATTTGGAAGTTAGTCCATAT
Ro06-9032251	Ro06	9032251	T	A	TTTGCACCAGGCAACCTAATTATCTCTGACGTACAATTAATTAAATTGAACTACTGCATGCATGCATTATATATCCTTACTTGTGATACTTAACTCCATC[T/A]GAAACCTTAAACAGWGGCTACTAATTTCAGAGGAGCCGGATCCATTCCAAGTGCATTCCAACGGAAAGATTTTCTGTCACTGTATGCAGGGAAACCACAC
Ro06-9032266	Ro06	9032266	A	T	CTAATTATCTCTGACGTACAATTAATTAAATTGAACTACTGCATGCATGCATTATATATCCTTACTTGTGATACTTAACTCCATCWGAAACCTTAAACAG[A/T]GGCTACTAATTTCAGAGGAGCCGGATCCATTCCAAGTGCATTCCAACGGAAAGATTTTCTGTCACTGTATGCAGGGAAACCACACACCTGAAGATTGTCC
Ro06-9055678	Ro06	9055678	T	A	TGCATTCATGCTGTTATTGTTTCTAGCTGTTCCAATTCATATCAGATTAGAGTATGAACCTTGTTTTAATTAGTTGGCTTTATCGAGAACTTTTGGCTTT[T/A]TAATTTCCTTGGTGCATGTCCCTTGATTTGGATGTTAGAAATCACAAGAATTCAGGTCATTAATAAAAGTGAACTTCTAGTTACTAGTCTTTTTCGCTCG
Ro06-9066588	Ro06	9066588	C	T	AATTAAGAAGCGTCCATTTTTCACAGGAAGTATCTGAATCATCTGTACTGTATTATAGAACTCACATGTTATATCCACCTTCAGAGAGATTCGTACTATC[C/T]GGTGTAAATGTTTCRGATAGAAACAATCCAGCCCCGGCAGCGTTTACGTTTGGATAAATATAGCTGACTCTGTCCCGGGCTGTTGTCATGAACAAGAAAG
Ro06-9066603	Ro06	9066603	A	G	ATTTTTCACAGGAAGTATCTGAATCATCTGTACTGTATTATAGAACTCACATGTTATATCCACCTTCAGAGAGATTCGTACTATCYGGTGTAAATGTTTC[A/G]GATAGAAACAATCCAGCCCCGGCAGCGTTTACGTTTGGATAAATATAGCTGACTCTGTCCCGGGCTGTTGTCATGAACAAGAAAGTAGCATGGCCAATCC
Ro06-9075519	Ro06	9075519	T	C	TATGACAAATTTGGTAGGACATAAATTAAGATTAAGACAAGCAAAGCATGTGGAAGGTTAAAGCTAAGTCAGGTAGGTGAACATCTTAGTTGCGAGAAAT[T/C]TTATAACTAAATGGATCACATTTTTGGACCACATAATATGACAGTTGATGTGTAACAAGAAACTATTTATCGCGCGCTCAACTATTGATTTACTCAACCG
Ro06-9094912	Ro06	9094912	C	T	GGATGACTTTGCGCCCTTCAGGGACGTCTATCCTTGCAGGCATGTTTGCAGCAGGTATATGTGATCTCGTCACTTTAGCTAAGTCATTTAATGTGTCTGG[C/T]AATTGATTAACAACATTTCGCAAACTTAGGATTCTCTGCACTTCCTTATCACTGTKTGCAGATGGGGGATCAAGATGAGACTGAGTGGGTACATGCCACG
Ro06-9094968	Ro06	9094968	G	T	ATATGTGATCTCGTCACTTTAGCTAAGTCATTTAATGTGTCTGGYAATTGATTAACAACATTTCGCAAACTTAGGATTCTCTGCACTTCCTTATCACTGT[G/T]TGCAGATGGGGGATCAAGATGAGACTGAGTGGGTACATGCCACGTTAATTCACGTCGTTCCTTATCAACGTTAAGGTGCGAATCTCCCCCTAACGACGGG
Ro06-9113800	Ro06	9113800	C	A	GAACGCAAATATTTAGCTGAAATAAGTTGAACCCACCAATTTTGAGGGTCAATAATGATTTTCCAACCGAATTTAGCTAAGGCAGCTTGATTAAAACAAT[C/A]AGTTGATCTAATACAGAGACCCTCTGGCCTTTGGAGTACATGCCAAAGACCATGTAATAGGAGGATGCTTCACATCCTTACCCCAATAAAAATCTGTACA
Ro06-9120213	Ro06	9120213	A	T	AACTTTTGACTTCACACAAATACATACAAAAAGCTCGTGATCCTCTACATCAGCTTTTGGATTTGCGTGCGTGAAACTTACGACGGCCCATCAGTTCAGC[A/T]TAACATCCCAACCGYGTGATRTCTTTGCATGCCACTTCGAGAAAATTATCAACGGTCAAGATTCGTGCTTGTATGGATAATAGAAACCTAGAGAGGTATA
Ro06-9120228	Ro06	9120228	T	C	ACAAATACATACAAAAAGCTCGTGATCCTCTACATCAGCTTTTGGATTTGCGTGCGTGAAACTTACGACGGCCCATCAGTTCAGCWTAACATCCCAACCG[T/C]GTGATRTCTTTGCATGCCACTTCGAGAAAATTATCAACGGTCAAGATTCGTGCTTGTATGGATAATAGAAACCTAGAGAGGTATAGTCAAGGATATTGCA
Ro06-9120234	Ro06	9120234	G	A	ACATACAAAAAGCTCGTGATCCTCTACATCAGCTTTTGGATTTGCGTGCGTGAAACTTACGACGGCCCATCAGTTCAGCWTAACATCCCAACCGYGTGAT[G/A]TCTTTGCATGCCACTTCGAGAAAATTATCAACGGTCAAGATTCGTGCTTGTATGGATAATAGAAACCTAGAGAGGTATAGTCAAGGATATTGCATTTTGT
Ro06-9124759	Ro06	9124759	T	G	TGCATTGGTGCTTTCTAGGAAAATACCACGATCTGTCCGCGGAATCAAAGTAATACTTTATCTTCAGTAAACTAACTGAACTCAATCTTTTGCCTTATTT[T/G]TGAAGTAATTCTTTTAATGTGATGTGTCCTGATATGTTGCCTTGATGTGTAGTGTTGCTTGTTTTGTGAGTAGCATGCATAATTGTATATTGGCTGAAGA
Ro06-9126514	Ro06	9126514	A	G	TTAGTGCTCCAAGCATCATAAAGTTTTTCACTGATAAAGTTGTACTTTTGTGTGGCAGCTTTTCATTTAGTAAAGACATGTCTCTACTGTTGAAATGTAA[A/G]ATRGCACAAGTATATTGCTTGTGTTTGTCATGTTCTGTTTTTAACGATATGTTCTTATATTTCTTGTTAAAGGGGTTTCTTGATTTGCGACTGAAGCCAT
Ro06-9126517	Ro06	9126517	G	A	GTGCTCCAAGCATCATAAAGTTTTTCACTGATAAAGTTGTACTTTTGTGTGGCAGCTTTTCATTTAGTAAAGACATGTCTCTACTGTTGAAATGTAARAT[G/A]GCACAAGTATATTGCTTGTGTTTGTCATGTTCTGTTTTTAACGATATGTTCTTATATTTCTTGTTAAAGGGGTTTCTTGATTTGCGACTGAAGCCATGGA
Ro06-9139156	Ro06	9139156	C	G	ATGCACATATTGAAAATGCTCCACCAGATCTCTCTCATTATGATTGACATGCACTTCCCACTCATTCATACATAGCTTGACTTGTCCAAATTTGTGAGCC[C/G]AGAAATAAGTGAACTTAATTGATTAAACCAAAATTATAATCAAGTTTCCATTTTTATTGCAGTAAACGAAAATGAGAGGGCTACTTTAATTTAGCACCTG
Ro06-9143777	Ro06	9143777	A	C	AAAATCATGGACTTAGTACCGAGGCTAATTACCCCTACACAGGGGTTGATGGTACATGCAACACCAAGAAGGAAGCAAGCCATGCAGCCTCAATAACTGG[A/C]CACGAAGACGTACCTGCAAATAGCGAAAGTGCCCTTCTTAAGGCTGTTGCTAATCAACCTATTTCTGTTGCCATTGATGCTAGTGGATCTGATTTTCAAT
Ro06-9155200	Ro06	9155200	G	C	AATCATATTGAGGACCACTCAAGCAAACAGGATCTAATAATGAGACAAAATCTTCCACTAAGTTTATGCTTTTGGACATGAACCATCCATGTAGATAAAA[G/C]TTAAAACTTAATGAAATTAACAARCATGTCTATCAAAAACTTGCCTCCCATTACTATCGTTTTCTCTAGTTATTTTATTCGTGAAAAAAATGAACTTCAG
Ro06-9155224	Ro06	9155224	G	A	AAACAGGATCTAATAATGAGACAAAATCTTCCACTAAGTTTATGCTTTTGGACATGAACCATCCATGTAGATAAAASTTAAAACTTAATGAAATTAACAA[G/A]CATGTCTATCAAAAACTTGCCTCCCATTACTATCGTTTTCTCTAGTTATTTTATTCGTGAAAAAAATGAACTTCAGAAATGTGCAATTACACAATGCCAC
Ro06-9162111	Ro06	9162111	G	A	CTTTGAACTTCAAAAACACCAATGACACGATAAGAAAAAAAAAAACCCTTCAAAAAGAACGTGTCACATACACTGATGCACGTACTTGTTCTCTTCAACA[G/A]TTTTCCATGATCYGTTTGGCRATGCGTCCTTAGGACAYCTTCGTCGGTAGGCCAGTCAGGTCGCTGAGCCCGGTGAGTCATTTTGGTGTGGACATAGGGT
Ro06-9162124	Ro06	9162124	C	T	AAACACCAATGACACGATAAGAAAAAAAAAAACCCTTCAAAAAGAACGTGTCACATACACTGATGCACGTACTTGTTCTCTTCAACARTTTTCCATGATC[C/T]GTTTGGCRATGCGTCCTTAGGACAYCTTCGTCGGTAGGCCAGTCAGGTCGCTGAGCCCGGTGAGTCATTTTGGTGTGGACATAGGGTCRTCAAGATGGGG
Ro06-9162132	Ro06	9162132	G	A	ATGACACGATAAGAAAAAAAAAAACCCTTCAAAAAGAACGTGTCACATACACTGATGCACGTACTTGTTCTCTTCAACARTTTTCCATGATCYGTTTGGC[G/A]ATGCGTCCTTAGGACAYCTTCGTCGGTAGGCCAGTCAGGTCGCTGAGCCCGGTGAGTCATTTTGGTGTGGACATAGGGTCRTCAAGATGGGGCGAGGAGG
Ro06-9162149	Ro06	9162149	C	T	AAAAAAACCCTTCAAAAAGAACGTGTCACATACACTGATGCACGTACTTGTTCTCTTCAACARTTTTCCATGATCYGTTTGGCRATGCGTCCTTAGGACA[C/T]CTTCGTCGGTAGGCCAGTCAGGTCGCTGAGCCCGGTGAGTCATTTTGGTGTGGACATAGGGTCRTCAAGATGGGGCGAGGAGGCTTTGGGTGGTCTAGAT
Ro06-9162213	Ro06	9162213	G	A	TTTCCATGATCYGTTTGGCRATGCGTCCTTAGGACAYCTTCGTCGGTAGGCCAGTCAGGTCGCTGAGCCCGGTGAGTCATTTTGGTGTGGACATAGGGTC[G/A]TCAAGATGGGGCGAGGAGGCTTTGGGTGGTCTAGATTAGACCCAATCAATTTGGTCGTTTAGGGGTCGCGGTTGATGGTATGGATGAGTGGCAGTGGTGG
Ro06-9169950	Ro06	9169950	T	G	TCAATTAGAAAGGAGAAGGAGCAATAGATTGATCAGCGTTAACAACTGAGGCACATGTTTTCCAAATCTGCACACTCCTAGGCAATGCCTCAGAAGCTTT[T/G]TCTTTAAGTTCCGGACTCGAGATCAGAAATTTCACCAACTGAATGTGACAATCATATCCCAGATACACAAGGGCTTTGCAGCAATTCGCAGTAAGAGGCT
Ro06-9171588	Ro06	9171588	G	A	AACGAAATTCAGATTTTATAAAAGCATCATCAAACTCCCAATAAAAAGATGGTCGCCAAAACAAAAATCCAACTCAATGTCCAAGAAACATATTCAGATG[G/A]ATAGTATCAGCCTTGATATGTATAAAAAGATCATTACATTTTGAGTGCATGTGATCCAAAAAGTGCAAGGGATTCTTCCTGACCTGAAAAGATAAGAATT
Ro06-9173190	Ro06	9173190	A	G	ACAACTGTGCAAGAAGTTCAGTAGTTGTCCTCCTTCCAGAGACTCAACAAACAGGAATTGGGGCAATCTTAAGCAACCCATACAAAGTGATATGAGGGAC[A/G]GTCACAACAAATACATGATTATAGTAAGACCTAAGTTATAATGAAARACATTCACAACATAGGTACAACTTCAAAATTTGGGGACTGTACTATAGGTCTT
Ro06-9173237	Ro06	9173237	A	G	CAAACAGGAATTGGGGCAATCTTAAGCAACCCATACAAAGTGATATGAGGGACRGTCACAACAAATACATGATTATAGTAAGACCTAAGTTATAATGAAA[A/G]ACATTCACAACATAGGTACAACTTCAAAATTTGGGGACTGTACTATAGGTCTTCTCTTTAGTRTCTCCTACATGCTAACATTGGCAAACACATAACTATT
Ro06-9173300	Ro06	9173300	A	G	AATACATGATTATAGTAAGACCTAAGTTATAATGAAARACATTCACAACATAGGTACAACTTCAAAATTTGGGGACTGTACTATAGGTCTTCTCTTTAGT[A/G]TCTCCTACATGCTAACATTGGCAAACACATAACTATTGGCTGGACTCAGCCATTCTAATTCCTTAAACACACAACAGGCTCATATTATTTAAATGAAAAT
Ro06-9174859	Ro06	9174859	G	A	TCATAGCTGTTCTTGAAGTTGCCCACCGGACGAAGAACAATGCCAGGAAACTCCGTGTCCATGGCCACATAAGGATAGTCGTCCACAATTTTGCGTATCA[G/A]AGCAAACTCCTCCTCCAGATTGTCGTCCCACACCTCCCTAATCTGGATCGAGTCGCTTTTCGGTAACAGCGACATTCCCAATCCACAAACAATTTTCGAT
Ro06-9188376	Ro06	9188376	T	C	AAAATTTATTCCTCAAGACAGAGAGGCGAATCTTTTAGCAAGTAGCAAGAAAATAATGATCACTAGCTATGATCATCCTCCACCTACTGCATGTGACTGT[T/C]TYTCTTCAATAATGAGAGATGAGGTGRATTGTACAAAAGCCACRTACACCTGGCTMGAGAATCTKGCAAAAGATAACCCTTATCAGATCTACCCGGATTC
Ro06-9188378	Ro06	9188378	C	T	AATTTATTCCTCAAGACAGAGAGGCGAATCTTTTAGCAAGTAGCAAGAAAATAATGATCACTAGCTATGATCATCCTCCACCTACTGCATGTGACTGTYT[C/T]TCTTCAATAATGAGAGATGAGGTGRATTGTACAAAAGCCACRTACACCTGGCTMGAGAATCTKGCAAAAGATAACCCTTATCAGATCTACCCGGATTCAA
Ro06-9188403	Ro06	9188403	G	A	GAATCTTTTAGCAAGTAGCAAGAAAATAATGATCACTAGCTATGATCATCCTCCACCTACTGCATGTGACTGTYTYTCTTCAATAATGAGAGATGAGGTG[G/A]ATTGTACAAAAGCCACRTACACCTGGCTMGAGAATCTKGCAAAAGATAACCCTTATCAGATCTACCCGGATTCAAATTTGGAAGATTACGACAAAGGAAC
Ro06-9188420	Ro06	9188420	A	G	GCAAGAAAATAATGATCACTAGCTATGATCATCCTCCACCTACTGCATGTGACTGTYTYTCTTCAATAATGAGAGATGAGGTGRATTGTACAAAAGCCAC[A/G]TACACCTGGCTMGAGAATCTKGCAAAAGATAACCCTTATCAGATCTACCCGGATTCAAATTTGGAAGATTACGACAAAGGAACAGCTAGTGGAATTGGGT
Ro06-9188432	Ro06	9188432	A	C	TGATCACTAGCTATGATCATCCTCCACCTACTGCATGTGACTGTYTYTCTTCAATAATGAGAGATGAGGTGRATTGTACAAAAGCCACRTACACCTGGCT[A/C]GAGAATCTKGCAAAAGATAACCCTTATCAGATCTACCCGGATTCAAATTTGGAAGATTACGACAAAGGAACAGCTAGTGGAATTGGGTCCCCAGGGTCCC
Ro06-9188441	Ro06	9188441	G	T	GCTATGATCATCCTCCACCTACTGCATGTGACTGTYTYTCTTCAATAATGAGAGATGAGGTGRATTGTACAAAAGCCACRTACACCTGGCTMGAGAATCT[G/T]GCAAAAGATAACCCTTATCAGATCTACCCGGATTCAAATTTGGAAGATTACGACAAAGGAACAGCTAGTGGAATTGGGTCCCCAGGGTCCCCCAATTATC
Ro06-9193766	Ro06	9193766	A	C	TATCACAAGCGTACACATATTCCCTTCCTTAGCTGCCCATAAAGGGGCATACTGTTACTGCCATTAGATCTTTGGGCTAGTTGATCGAAGCGGGTGATAC[A/C]TATAGACACACAGTAAATTTGYAGTCACAGAATTTCCCCAAAAACACTTATCAAGGTTGAATATTAAATGAAGTACAGTTTCTCCAACTTAACAAGTTCT
Ro06-9193788	Ro06	9193788	T	C	CCTTCCTTAGCTGCCCATAAAGGGGCATACTGTTACTGCCATTAGATCTTTGGGCTAGTTGATCGAAGCGGGTGATACMTATAGACACACAGTAAATTTG[T/C]AGTCACAGAATTTCCCCAAAAACACTTATCAAGGTTGAATATTAAATGAAGTACAGTTTCTCCAACTTAACAAGTTCTTTTCATATTGTATGATCCACAT
Ro06-9197682	Ro06	9197682	G	A	TCTTATATCCATCCGAGCCTTCATCACTTGAAGTTCTTTCTGCACAACAATGGCCTCAGATTCCAATACCTTAATCCGCTTTACCATCTTGTTTATGACA[G/A]TGTGGTTCTTCAATCCCGCCTGCGAAAGAAGAAAAACAATGAGAATTACAAGACACAAGATGTATTGACGCAGTAAAATARATAGACGAGTTAATAAGAA
Ro06-9197763	Ro06	9197763	A	G	TACCATCTTGTTTATGACARTGTGGTTCTTCAATCCCGCCTGCGAAAGAAGAAAAACAATGAGAATTACAAGACACAAGATGTATTGACGCAGTAAAATA[A/G]ATAGACGAGTTAATAAGAAAATAACATACCAACATCATGGAACTCTTGGCCCCTTTCACAAGCATGTCAAGCTCTCCTTCGAGTTCCCCCTCTGCATGAG
Ro06-9200329	Ro06	9200329	A	C	AAAGGGGCATACCGCCATCAGATCTTTGGGCTAGTTGATCGAAGCCGGTGATACAGATACAGATACAGACAGTACATTTGCAGTCACAGAATTTCCCCAT[A/C]AAATTTATCAGGCTTCAATATTAAATGGAAGTACAGTTTCTCCGACCTAACGAGTTCTTTTCATATTATATATGATCCACATAAGGAAACTCAAACTTGC
Ro06-9213827	Ro06	9213827	C	T	TGGGTTTTGCTGATGTTGGGTATCTCTCTGACCCTCGTTAAGGTTGTTCCTATATGGGTTATGTCTTTACCATGGGAAACACCTTGCTATCTTGGTAAGT[C/T]TAYTAAACAGACTCTTGTCACTACTTCTTCGAACCATGTCGAGATTATCTCCATGAACCCGTTCGTTAGTGTATATGGTTAAGGTCCATAATTACACATC
Ro06-9213830	Ro06	9213830	C	T	GTTTTGCTGATGTTGGGTATCTCTCTGACCCTCGTTAAGGTTGTTCCTATATGGGTTATGTCTTTACCATGGGAAACACCTTGCTATCTTGGTAAGTYTA[C/T]TAAACAGACTCTTGTCACTACTTCTTCGAACCATGTCGAGATTATCTCCATGAACCCGTTCGTTAGTGTATATGGTTAAGGTCCATAATTACACATCTAA
Ro06-9218884	Ro06	9218884	A	C	TAGGCACTTTCATACTGATCTTTGCTGGGACAGCAACAGCGATTGTGAACCAGAAGACAGAAGGCACTGAGAGCCTTCTCGGCCTTGCAGCCTCCACCGG[A/C]CTCGCTGTTATGATTGTGATTTTATCGACAGGCCACATCTCCGGAGCTCATCTCAAYCCTTCTATCACCATTGCCTTTGCTGCACTCAAGCACTTTTCAT
Ro06-9218941	Ro06	9218941	C	T	CAGAAGGCACTGAGAGCCTTCTCGGCCTTGCAGCCTCCACCGGMCTCGCTGTTATGATTGTGATTTTATCGACAGGCCACATCTCCGGAGCTCATCTCAA[C/T]CCTTCTATCACCATTGCCTTTGCTGCACTCAAGCACTTTTCATGGAAACATGTGAGAAATGTTTCTCTTACCAGAAAGTCTAGCATCGTCATGTTAGTTG
Ro06-9222638	Ro06	9222638	A	G	GATCCAAAAAATCTCAGTTTGAATACAACAGCTCAACTAAGCACTAAAACAATTTTTAACTGCCTCCTCCAAGCATGAATAAGAAAGAAGGGTACATCCT[A/G]AAATTTTATTCCGTTTCGTCTGATAAATCATAAATCTGAGGAAATACAACCCCATGCAGATGCCCAAAAACAAATTTTATACCATCAACCATCCATATCC
Ro06-9254654	Ro06	9254654	T	A	CATGCACTAAAAGCACAATTTTGAGATCAGGTGAACTCTACTGCCCAGTAATTCAAAGACAGTGAAAGGAGGGTATACATGCATGAGCCTGCTTTGTGCT[T/A]AGGTACAATCGAATTAGATTGATGATGATTTCTATTATSTATTTTTCTATTRTYATTGAATACGACAAAACCTAAACCCCCACTAAGCAAGTCTAAAGCA
Ro06-9254693	Ro06	9254693	C	G	ACTGCCCAGTAATTCAAAGACAGTGAAAGGAGGGTATACATGCATGAGCCTGCTTTGTGCTWAGGTACAATCGAATTAGATTGATGATGATTTCTATTAT[C/G]TATTTTTCTATTRTYATTGAATACGACAAAACCTAAACCCCCACTAAGCAAGTCTAAAGCAATACTCAAATGCTAAAGCGACAAATAATCTCCTCTTTAA
Ro06-9254706	Ro06	9254706	G	A	TCAAAGACAGTGAAAGGAGGGTATACATGCATGAGCCTGCTTTGTGCTWAGGTACAATCGAATTAGATTGATGATGATTTCTATTATSTATTTTTCTATT[G/A]TYATTGAATACGACAAAACCTAAACCCCCACTAAGCAAGTCTAAAGCAATACTCAAATGCTAAAGCGACAAATAATCTCCTCTTTAATTATTAAAAGATC
Ro06-9254708	Ro06	9254708	T	C	AAAGACAGTGAAAGGAGGGTATACATGCATGAGCCTGCTTTGTGCTWAGGTACAATCGAATTAGATTGATGATGATTTCTATTATSTATTTTTCTATTRT[T/C]ATTGAATACGACAAAACCTAAACCCCCACTAAGCAAGTCTAAAGCAATACTCAAATGCTAAAGCGACAAATAATCTCCTCTTTAATTATTAAAAGATCCT
Ro06-9269563	Ro06	9269563	G	A	GACCTTGATCATTGTCCTTGTAGGTACTCAAGTCACGCCCAGGTGCATCCCTACTGAGCAGCTGATAAACAACAAAAACATGTATTTTGCACTTGAATTG[G/A]ACCCAACCAAGCTAATTTGGCRTGAAGACATTTGCCACATCAATGAGTTAACGTCCCATTGTACGGAGGTTTGACAKATGAACCTATTGAATGAGAATTA
Ro06-9269585	Ro06	9269585	G	A	GGTACTCAAGTCACGCCCAGGTGCATCCCTACTGAGCAGCTGATAAACAACAAAAACATGTATTTTGCACTTGAATTGRACCCAACCAAGCTAATTTGGC[G/A]TGAAGACATTTGCCACATCAATGAGTTAACGTCCCATTGTACGGAGGTTTGACAKATGAACCTATTGAATGAGAATTAAGATTTAATAGTGCATAGATTA
Ro06-9269640	Ro06	9269640	G	T	ACATGTATTTTGCACTTGAATTGRACCCAACCAAGCTAATTTGGCRTGAAGACATTTGCCACATCAATGAGTTAACGTCCCATTGTACGGAGGTTTGACA[G/T]ATGAACCTATTGAATGAGAATTAAGATTTAATAGTGCATAGATTATTTTAGTGCAATTAGAATTTTAAAGGCTGAAGTAATTAGACCCAAAAAATACACG
Ro06-9269954	Ro06	9269954	T	C	GAAAAGAGTTGCTGCAAACGGTGGAGTGCAATGTATATAGTTTTTTTTTTTTCTCATTTTGTTAAAAAGAAAAATCTTTATATGATACATGTACTGTCAG[T/C]AAATAYAATATTTGGTATCTGAACTTTCATAAGAATCTGGTGGTACATAAATTATTCTTTCGTTTACAATTTGTTGAGGGTCCTTTTTGATATTGCATGA
Ro06-9269960	Ro06	9269960	C	T	AGTTGCTGCAAACGGTGGAGTGCAATGTATATAGTTTTTTTTTTTTCTCATTTTGTTAAAAAGAAAAATCTTTATATGATACATGTACTGTCAGYAAATA[C/T]AATATTTGGTATCTGAACTTTCATAAGAATCTGGTGGTACATAAATTATTCTTTCGTTTACAATTTGTTGAGGGTCCTTTTTGATATTGCATGACTAGGC
Ro06-9274783	Ro06	9274783	G	T	ATAAAGTTCCCTTTCTTTAGGGGCATGAGATCTATGCTTGTTTGGCAGTAATTGATTTTTTCTAGCTTCTAGAGGCATGGAGTTTATATTTGCTTTTAGA[G/T]GCATGAAATCAATGTTTGCTTGGTAGTAATTGAAGYGTGTRTGCTTGGAAATATATGTGTCATATTTTAAGCGAGGMGGTGTACATGTCATATATTGGCT
Ro06-9274819	Ro06	9274819	T	C	CTTGTTTGGCAGTAATTGATTTTTTCTAGCTTCTAGAGGCATGGAGTTTATATTTGCTTTTAGAKGCATGAAATCAATGTTTGCTTGGTAGTAATTGAAG[T/C]GTGTRTGCTTGGAAATATATGTGTCATATTTTAAGCGAGGMGGTGTACATGTCATATATTGGCTTGGCTTGGCTTGTGCTTTGATTGACTACCATAGCTT
Ro06-9274824	Ro06	9274824	G	A	TTGGCAGTAATTGATTTTTTCTAGCTTCTAGAGGCATGGAGTTTATATTTGCTTTTAGAKGCATGAAATCAATGTTTGCTTGGTAGTAATTGAAGYGTGT[G/A]TGCTTGGAAATATATGTGTCATATTTTAAGCGAGGMGGTGTACATGTCATATATTGGCTTGGCTTGGCTTGTGCTTTGATTGACTACCATAGCTTGCTTG
Ro06-9274860	Ro06	9274860	C	A	TGGAGTTTATATTTGCTTTTAGAKGCATGAAATCAATGTTTGCTTGGTAGTAATTGAAGYGTGTRTGCTTGGAAATATATGTGTCATATTTTAAGCGAGG[C/A]GGTGTACATGTCATATATTGGCTTGGCTTGGCTTGTGCTTTGATTGACTACCATAGCTTGCTTGGCTTGTTGTAATTTGTGCTTGGCTTGACATGGAGTT
Ro06-9286552	Ro06	9286552	A	G	TTAATTTTTCTTCATTGTCCTTTTGCATTTGTATATTTGGGTGCATGCCCTTTGTTCACCGGCGTCATCCTCAATCAAGTTAGTGAAGCACTGAAGCATC[A/G]TGTTGGATCTGGTTCAATCAACCAAGGAGGTGAGAGTGGACTTCAATGTGATTGTGAGAATCATGTTTACTGTAATTGGCTGAATTTTACAAAACTCATC
Ro06-9296517	Ro06	9296517	G	T	AAAATATGGAAGGCAAACTCAACAAGAACTGAGTAAATAACAACCAAACAATAGGTGATTATCTAAAGCATTCAAGACATGCATTCTACTACTAACATCG[G/T]GACTAAGCCAGATAGCCCCAAYGAAGAAATRTGTTTCAACATAAAGCAAGACTTCATTAGGTAATGTGCTTCCTAAGAAGCATATAATAATCACATGAGA
Ro06-9296539	Ro06	9296539	T	C	CAAGAACTGAGTAAATAACAACCAAACAATAGGTGATTATCTAAAGCATTCAAGACATGCATTCTACTACTAACATCGKGACTAAGCCAGATAGCCCCAA[T/C]GAAGAAATRTGTTTCAACATAAAGCAAGACTTCATTAGGTAATGTGCTTCCTAAGAAGCATATAATAATCACATGAGACAGACCRAGAATACAACGAGCT
Ro06-9296548	Ro06	9296548	G	A	AGTAAATAACAACCAAACAATAGGTGATTATCTAAAGCATTCAAGACATGCATTCTACTACTAACATCGKGACTAAGCCAGATAGCCCCAAYGAAGAAAT[G/A]TGTTTCAACATAAAGCAAGACTTCATTAGGTAATGTGCTTCCTAAGAAGCATATAATAATCACATGAGACAGACCRAGAATACAACGAGCTGACTGAGAC
Ro06-9296624	Ro06	9296624	A	G	GCCAGATAGCCCCAAYGAAGAAATRTGTTTCAACATAAAGCAAGACTTCATTAGGTAATGTGCTTCCTAAGAAGCATATAATAATCACATGAGACAGACC[A/G]AGAATACAACGAGCTGACTGAGACTGCAAGAACCCTAGGCAGTTCTCTTCCTCTGTAACCCTTGAGTGGGGATGCAAATTTAGCTAAAGGAGGAGTCCTG
Ro06-9297755	Ro06	9297755	C	T	CTAATTGTTCAATCACAACTTTCCGGTCAACACGCTTGGTCAACAATCCACAATCTTTCATCCCAGTAATTCACCAAACCCAATCTTCCGATCTTTGATT[C/T]CAAGAAATCCTTAATCCTTTTCTTGATTTAYACTCCTGTAAAGCAATTCCATGCAACGCAGGAAGCTCCAACTGACCCTGATCTATGCTCCTAAATTCAA
Ro06-9297786	Ro06	9297786	C	T	ACGCTTGGTCAACAATCCACAATCTTTCATCCCAGTAATTCACCAAACCCAATCTTCCGATCTTTGATTYCAAGAAATCCTTAATCCTTTTCTTGATTTA[C/T]ACTCCTGTAAAGCAATTCCATGCAACGCAGGAAGCTCCAACTGACCCTGATCTATGCTCCTAAATTCAATAAAATTAAAGCTAAAACAATTTAATCGAAA
Ro06-9297891	Ro06	9297891	G	A	CTGTAAAGCAATTCCATGCAACGCAGGAAGCTCCAACTGACCCTGATCTATGCTCCTAAATTCAATAAAATTAAAGCTAAAACAATTTAATCGAAAAAAA[G/A]AAAGCATGCAGCGGAGAAATCAATACTATTAGTACACAAACAATCAGAAAACTCTCCGAGGAAATGAATAATTATACGTTAATTAAGCGAAATTAAACCA
Ro06-9302062	Ro06	9302062	C	A	GACAAAGAACAAATCTCTGATCATCAAGTGGAATTCTTCGAGCTAAAAGATCTCTGGTAGGAAGAATGTTCTTGAAAAATTTCCAACTGAAAATGCAGAC[C/A]TTTGGTGGMMCATTAGCATGCCAAACACGTTTCCAAACCAGTGAAGCAGGACTATCTCCTAGTGCCATTTGAACTTGTAGCCCCAGAAAAGCCATTCATC
Ro06-9302071	Ro06	9302071	C	A	CAAATCTCTGATCATCAAGTGGAATTCTTCGAGCTAAAAGATCTCTGGTAGGAAGAATGTTCTTGAAAAATTTCCAACTGAAAATGCAGACMTTTGGTGG[C/A]MCATTAGCATGCCAAACACGTTTCCAAACCAGTGAAGCAGGACTATCTCCTAGTGCCATTTGAACTTGTAGCCCCAGAAAAGCCATTCATCAACATCTCC
Ro06-9302072	Ro06	9302072	C	A	AAATCTCTGATCATCAAGTGGAATTCTTCGAGCTAAAAGATCTCTGGTAGGAAGAATGTTCTTGAAAAATTTCCAACTGAAAATGCAGACMTTTGGTGGM[C/A]CATTAGCATGCCAAACACGTTTCCAAACCAGTGAAGCAGGACTATCTCCTAGTGCCATTTGAACTTGTAGCCCCAGAAAAGCCATTCATCAACATCTCCC
Ro06-9332864	Ro06	9332864	T	C	GCCTGAGCTACACCATCACCTACATTAGGGATGGCGCCAGCAGTGCCCTGCCCAAGCTTTTGGGTGGCATGTGCGGCGTTAGTGAGTCTGAAGTCCTTTT[T/C]AGGTACTTCCATCCTTGCAGGTACATTTGCAGAAGGTATATGAGATATAGTCACTTTAGCAAGAACAGAGAAAGCATCCGGAAGAGAGTCGGTGACTTTC
Ro06-9347439	Ro06	9347439	C	T	GGTTGCTTAATGCTTGTTCCATTGTAATGTTGTAGGTTCTCAGAGATGGAAGATGGTCTGAACTAGAGGCTGCAATCTTGGTGCCAGGAGATGTGGTCAG[C/T]ATCAAGTTGGGAGATATTGTCCCAGCCGATGCTCGTCTCTTGGATGGAGATCCCCTAAAGATCGATCAGTCTGCCCTCACTGGCGAGTCTTTGCCTGTGA
Ro06-9389702	Ro06	9389702	G	A	CACTATGTGGGAGTAGTCGATAGGGGCCTAGCCTCCGTAATCCAAAATGAGTCCTGCCTCTCGCTTATTCTTGATCTGGCTATTCACCTTCTGAAACAAA[G/A]GAAAATTATTTGAGTCTAGACATAATACTTAGGCCGCATGTCCACCTTTAGTTACCGCTTGGAATCAACTTAATTTTTAACTATATTGAGGACAAACGAA
Ro06-9411126	Ro06	9411126	A	G	ACTGTCAATGGTAATTTGTAAAGGATGTTTCAGATGTTGGTGTTAATTTTTGTTTGGATCTTGCTACATGGATTTGAGTTCAATTGCAAGAAATGGTTCC[A/G]CTACAATTTGATCTAGGCAGTTTACTTATCCAACAAGCAATGCATCCAAATTGAGCCAATTACAACCATAGGAACCTTTACRTGTGTGATCCACATGCAA
Ro06-9411208	Ro06	9411208	A	G	ATTGCAAGAAATGGTTCCRCTACAATTTGATCTAGGCAGTTTACTTATCCAACAAGCAATGCATCCAAATTGAGCCAATTACAACCATAGGAACCTTTAC[A/G]TGTGTGATCCACATGCAAAATTTTAGTGACAATTAGAGCACATTACGAACCAGAGAAAAGGAATGCATTAGAAAGCAGGACACTGAAAACAAATTGATAT
Ro06-9412002	Ro06	9412002	A	G	GATGTTTGATCTTAGTTGTGAGCTGTGCCACTGCAGAGTGAAGAAAAAGGGGTTAGCAAAGCATCACAAGTAGAAAACATGCCATTTGTTTACTAACTAC[A/G]GCAAAATTGAACGTTATCTTTTTTCCCAGCCAGGAGTAGGGGAGAGAAAAAGTAATCCACTATTAGTGATAGAAACTCTATTGAGACCTCCAAATTTGTT
Ro06-9414212	Ro06	9414212	C	T	TTAAATTCATCTCTAACTTTACCAAGCTCAACCTTCAGCTTTTCTGCAGAAGACATGTTATCTGGATGGAAATACTGCATTAAACACATTCAACATAAAA[C/T]ATATTAGGCACCAAACTACTGAATATAGATCACCATTGAGAATATGGGAGAGGCTCTAGTGAGGACCAAACAATGAGGACTTGTTGAAGACTTTCAAACT
Ro06-9416306	Ro06	9416306	C	A	TGATCCTAGAAGATAGAACAAGGGCCCGTTTCTTTAGACACCTAAGGGCATATTTTTAATGATTAACCAAATTGGGTATAAGAACAATTATGTTTCTGCT[C/A]ATACAATTATGCATGTGCGTAACTTTCTGCAAAAATAAAAATCAAGTTAAACCTTAAGCTTACAATTTAAGTATCCAGAAAAATATAGTACAGAATACTG
Ro06-9482725	Ro06	9482725	C	T	ATCATTAGCTTCAACTTCATCTTTAGAATGCTTTGTTATGTTGTCAACGATCTCATATACGCTCAAAACCTTTGTAGAAGATAAATGTTTGCATCCAAAA[C/T]ATTTATYTTCTATGTAGTACTTTGAATCTCATAGTACTTTGAATTTTAACTTGTCATATGATGTGATAAATCGAATTCATTGAACTTGTTAAGTGAATAA
Ro06-9482732	Ro06	9482732	C	T	GCTTCAACTTCATCTTTAGAATGCTTTGTTATGTTGTCAACGATCTCATATACGCTCAAAACCTTTGTAGAAGATAAATGTTTGCATCCAAAAYATTTAT[C/T]TTCTATGTAGTACTTTGAATCTCATAGTACTTTGAATTTTAACTTGTCATATGATGTGATAAATCGAATTCATTGAACTTGTTAAGTGAATAAATATAAT
Ro06-9484987	Ro06	9484987	C	T	TCCGAATGTCATAACTTATTCTCTAATTATGCAATCTAGCTTGGTCATGCTCAAATCAACATAATAGAGATCATTAAGGTCTAAGAGAATATGAACATAG[C/T]AAGAATCTCAGAACATGGCAAGTATCCTAAGTATCTTAGAAACGATTTCATACAAATACCGCAATACTGGTCGCACCACAAATTAAACACATGCAAATAT
Ro06-9508145	Ro06	9508145	C	T	CTATGTTCGAGCTACACCACCACTTGAGATGGAACCAGCACTCAACGAGCCGCCAAGCCCAGAGGTTCGACCACCTAGTTTGGCCGGACGCCGACGCACG[C/T]GCTTCACGCGCCGCCTCTGGCGCGTGAACCACCTATGTACTGCCGTGCATGTCGCCGACCTATTCTTCTCGTTCTGGTAAGACGATCTCGAGGTCTCCTT
Ro06-9568027	Ro06	9568027	A	C	AGCGCTGCGAGCACGAGAAAGAGATCAACTTTCTTACGGCCTCCAACCAGAGGCATGAACATGCCCACAACGTAGTCTCTGTAAACTGGATTCCCATTTC[A/C]TTTACTCCATCCGATGACATCTGCAAGTTCTTCGGCGGGTTGATTAGCCATATAGATCTGAAATGACCGGTCACTGTAGTTGATTATATCTCCTTCAACT
Ro06-9569678	Ro06	9569678	A	G	GAACATGAAGAAGTTGCTTGGAAACGCTAAAAATTTGTTGTCTTTCTGAATTCAAGCTTTTATCCTCGACAGTTTTTGAGCACATGTGTGATTGGTGATT[A/G]AATTGACTTGTACTAATTTGCCCGCTGAGACATGAACATCCAGATCAAAAAGAGACATGATGGAAGACTTGTGTAAACTATTATTGGGTCTACTCTAAAT
Ro06-9583309	Ro06	9583309	C	T	CTCTCATTAAATAATCTCATTCCACATCAATCAAATACGTGTAGTCCTCTTTGTGTAGGCATGCAGTTGGACTTGAGAAATCTCTTGGTCTTCGGCATTT[C/T]GCTAAGTCTTTACGTCGCATAAAACCRATTAGGRGCAAAGTGATTGAGAGTTCTCACAAAATTATTTTGCACTAATCGTCCCTRGTACTTTTATACTTTT
Ro06-9583336	Ro06	9583336	A	G	CAATCAAATACGTGTAGTCCTCTTTGTGTAGGCATGCAGTTGGACTTGAGAAATCTCTTGGTCTTCGGCATTTYGCTAAGTCTTTACGTCGCATAAAACC[A/G]ATTAGGRGCAAAGTGATTGAGAGTTCTCACAAAATTATTTTGCACTAATCGTCCCTRGTACTTTTATACTTTTAATAAAATCTAAGTACTTTATTATTCA
Ro06-9583343	Ro06	9583343	G	A	ATACGTGTAGTCCTCTTTGTGTAGGCATGCAGTTGGACTTGAGAAATCTCTTGGTCTTCGGCATTTYGCTAAGTCTTTACGTCGCATAAAACCRATTAGG[G/A]GCAAAGTGATTGAGAGTTCTCACAAAATTATTTTGCACTAATCGTCCCTRGTACTTTTATACTTTTAATAAAATCTAAGTACTTTATTATTCATGATTTA
Ro06-9583393	Ro06	9583393	G	A	TTGGTCTTCGGCATTTYGCTAAGTCTTTACGTCGCATAAAACCRATTAGGRGCAAAGTGATTGAGAGTTCTCACAAAATTATTTTGCACTAATCGTCCCT[G/A]GTACTTTTATACTTTTAATAAAATCTAAGTACTTTATTATTCATGATTTAGCCCCTTGAGCACATGCCAATTAATTAAGTTTATTTTATTTTATTTTATT
Ro06-9606381	Ro06	9606381	G	A	TGTTGGATGAACAACTTTACCAAGTGGACAACTACAATCCGGAGCGCCAGTCTTCACAGCTCAACAATCATCCTCATTACTCCTATGGCAAGAGGCATGT[G/A]GAGAATCCAGCTYCAACCAACTCTCAARGCCACCAAGGAGGCAGMAACTATCAAGGAAGTAACAACTACCAAKGAGGTAGATTCCAAGGAGGAAGGTTTC
Ro06-9606394	Ro06	9606394	C	T	ACTTTACCAAGTGGACAACTACAATCCGGAGCGCCAGTCTTCACAGCTCAACAATCATCCTCATTACTCCTATGGCAAGAGGCATGTRGAGAATCCAGCT[C/T]CAACCAACTCTCAARGCCACCAAGGAGGCAGMAACTATCAAGGAAGTAACAACTACCAAKGAGGTAGATTCCAAGGAGGAAGGTTTCAAGGAGGAAACCA
Ro06-9606409	Ro06	9606409	A	G	CAACTACAATCCGGAGCGCCAGTCTTCACAGCTCAACAATCATCCTCATTACTCCTATGGCAAGAGGCATGTRGAGAATCCAGCTYCAACCAACTCTCAA[A/G]GCCACCAAGGAGGCAGMAACTATCAAGGAAGTAACAACTACCAAKGAGGTAGATTCCAAGGAGGAAGGTTTCAAGGAGGAAACCAACYATTTCAAGGGAG
Ro06-9606426	Ro06	9606426	A	C	GCCAGTCTTCACAGCTCAACAATCATCCTCATTACTCCTATGGCAAGAGGCATGTRGAGAATCCAGCTYCAACCAACTCTCAARGCCACCAAGGAGGCAG[A/C]AACTATCAAGGAAGTAACAACTACCAAKGAGGTAGATTCCAAGGAGGAAGGTTTCAAGGAGGAAACCAACYATTTCAAGGGAGATCACAAGGGTTTCAAG
Ro06-9606454	Ro06	9606454	T	G	TCATTACTCCTATGGCAAGAGGCATGTRGAGAATCCAGCTYCAACCAACTCTCAARGCCACCAAGGAGGCAGMAACTATCAAGGAAGTAACAACTACCAA[T/G]GAGGTAGATTCCAAGGAGGAAGGTTTCAAGGAGGAAACCAACYATTTCAAGGGAGATCACAAGGGTTTCAAGGCCCTAACACCTTTCAAAGAGGAGCTCC
Ro06-9606497	Ro06	9606497	T	C	ACCAACTCTCAARGCCACCAAGGAGGCAGMAACTATCAAGGAAGTAACAACTACCAAKGAGGTAGATTCCAAGGAGGAAGGTTTCAAGGAGGAAACCAAC[T/C]ATTTCAAGGGAGATCACAAGGGTTTCAAGGCCCTAACACCTTTCAAAGAGGAGCTCCTAATCCCATGTATTCACAGGAGGCAAACACTTCACAAGCCCCT
Ro06-9636545	Ro06	9636545	T	C	CAGACTTCTCGGTCAATTGTTGACGGCGGTAGTATTCAGGGTCGAGATATCCAAAACTACCTTTGACCAACGTGCTAATATGGGTCTTGGACATGTTAGT[T/C]GGGCCCATTTTGGACAACCCAAAATCCGAGACCTTGGCCACCCATTTATCGTCCAACAAGATATTTGTGCTMTTCACGTCACGGTGAATGATCATACACT
Ro06-9636617	Ro06	9636617	C	A	TGCTAATATGGGTCTTGGACATGTTAGTYGGGCCCATTTTGGACAACCCAAAATCCGAGACCTTGGCCACCCATTTATCGTCCAACAAGATATTTGTGCT[C/A]TTCACGTCACGGTGAATGATCATACACTTGGCACCAGTGTGAAGGTACTGCAAACCACGCGCCGCGCCAATACAAGCTTCGAGACGTTGCTCCCACGAAA
Ro06-9641461	Ro06	9641461	G	A	ATTTCTTTTGCCTCTTAGATCGGAGATAATTTTTCTGATCTTGTTTAATGAATCCAAGAGACTCTCTTCCACCAACTTCCCTGCCCATTAACTCGTATGC[G/A]AGCKTAAGCGGGATTCCAGACTCTTCTACCAAATCTATTTCAGYYGCTTGTGAAGGAGAAATTTTTCGTTGAGATGGTAACATATGTGCACACTCTTGTA
Ro06-9641465	Ro06	9641465	T	G	CTTTTGCCTCTTAGATCGGAGATAATTTTTCTGATCTTGTTTAATGAATCCAAGAGACTCTCTTCCACCAACTTCCCTGCCCATTAACTCGTATGCRAGC[T/G]TAAGCGGGATTCCAGACTCTTCTACCAAATCTATTTCAGYYGCTTGTGAAGGAGAAATTTTTCGTTGAGATGGTAACATATGTGCACACTCTTGTATTAC
Ro06-9641505	Ro06	9641505	C	T	TTAATGAATCCAAGAGACTCTCTTCCACCAACTTCCCTGCCCATTAACTCGTATGCRAGCKTAAGCGGGATTCCAGACTCTTCTACCAAATCTATTTCAG[C/T]YGCTTGTGAAGGAGAAATTTTTCGTTGAGATGGTAACATATGTGCACACTCTTGTATTACAAGATCATGGTTATGAGTTTCTTCAAATTGAACAACCCTG
Ro06-9641506	Ro06	9641506	T	C	TAATGAATCCAAGAGACTCTCTTCCACCAACTTCCCTGCCCATTAACTCGTATGCRAGCKTAAGCGGGATTCCAGACTCTTCTACCAAATCTATTTCAGY[T/C]GCTTGTGAAGGAGAAATTTTTCGTTGAGATGGTAACATATGTGCACACTCTTGTATTACAAGATCATGGTTATGAGTTTCTTCAAATTGAACAACCCTGA
Ro06-9647060	Ro06	9647060	A	G	ATGTGTGAGAGTTCAACATCAGGATATTCCAAGGCTATTGCCAGGATTCTTTTTCTCCAAAACATTGAAGCCTGGATATCGAATAAAATATATCAATACT[A/G]CAAGAAATTGAAATGTAATAAACTTATGATCTAACTTAAGCATTTCAACATGGAAAGAAAGGCAAGAGATATATACAAGAACACAATATTATTAGTCTCT
Ro06-9669131	Ro06	9669131	G	T	AAAAGTTGTGTGCGCGCGTGTGGTTAATTGTTTCATGAAGTACTCAGCTCGTTAGATTGTTTAGAGAAAACTGGTATGTTTATCTGAAGGTCTTAAGAGT[G/T]TTAATTCYCTAAACCCTAACCCTTTGTTTATTCAAGTTTTCGAATTTATGCTCCTTTAATTTGACAGTTCTCTTTSACCAAACRGTTTTCCTAAAAAATG
Ro06-9669139	Ro06	9669139	T	C	TGTGCGCGCGTGTGGTTAATTGTTTCATGAAGTACTCAGCTCGTTAGATTGTTTAGAGAAAACTGGTATGTTTATCTGAAGGTCTTAAGAGTKTTAATTC[T/C]CTAAACCCTAACCCTTTGTTTATTCAAGTTTTCGAATTTATGCTCCTTTAATTTGACAGTTCTCTTTSACCAAACRGTTTTCCTAAAAAATGCTCTTAAT
Ro06-9669207	Ro06	9669207	G	C	TGTTTATCTGAAGGTCTTAAGAGTKTTAATTCYCTAAACCCTAACCCTTTGTTTATTCAAGTTTTCGAATTTATGCTCCTTTAATTTGACAGTTCTCTTT[G/C]ACCAAACRGTTTTCCTAAAAAATGCTCTTAATTCCTCTTTGAGCTCGAGTTACATGCTTGAATATTATTTGTCTTTGACAATACATATATATGGCGAGAT
Ro06-9669215	Ro06	9669215	A	G	TGAAGGTCTTAAGAGTKTTAATTCYCTAAACCCTAACCCTTTGTTTATTCAAGTTTTCGAATTTATGCTCCTTTAATTTGACAGTTCTCTTTSACCAAAC[A/G]GTTTTCCTAAAAAATGCTCTTAATTCCTCTTTGAGCTCGAGTTACATGCTTGAATATTATTTGTCTTTGACAATACATATATATGGCGAGATAAAACTAT
Ro06-9669990	Ro06	9669990	C	T	TCCGGAGAAAGAAGTTGAGCTCTAAGGACCAATGTATGTCTTCTGATCAAGACAAGGTTCCCAATGGAACAGGAGAAGATGAACAAGTTTCTTCACCAAG[C/T]ACTTCAGATCAGAATGGAAAACATAAAAGAAAAAGACAGGACCAAAGTGAAGATGACGAAGAAGGTGGAGATGATGAACGTGAGAATGAGGAACCATCAA
Ro06-9672292	Ro06	9672292	G	T	AGTTAAGTTTGTAAGCATGTACGTTCACTAGAATGTTAGATAGGGTGTGGCTAGCTAGTGATCGACCATTAGTTCACAATGACTTGTTGAACAACTTGAA[G/T]TACTTTGTCCAGCAACATGTGTAACATCTTACTGTTATGTATATAAAAGTTTGGCTTTAATTTACAAATTGGAATATTCCCTGCCCTAAGATCTTTTTTA
Ro06-9697118	Ro06	9697118	A	T	TGGCCATCTCAGTTACAAAGGTCTGCGTACCTTGCAATACAGGAAAATGGTGTTTGGATTGCCAAAAATTGTAGCTTCAAGTGTCACTTGCGAGGCATGT[A/T]TGAAGGGAAAGCAGCATCGGACTCCAATTCCCAAAAGGAGTCAATGGAGAGCAACTGAGAGACTGAAACTAGTTCATGCAGATCTTTGCGGCCCTATCAC
Ro06-9734646	Ro06	9734646	G	T	GCAAACAGTACTACTGGAAAGGGGTAAGGTTTCTAGCCCAGAACAAATGGACACAACAGATTCCCTCATGGCCCCATCCAATGGATCTGCTATGTCTGCT[G/T]TCGGCGATGATGGACTACTACAACAATCGTGGATATTTATCAGGGAGAATTCAAATTTTGATATAGATGAAAATTATATGAATCATAAAGAAGTAGTAGT
Ro06-9743232	Ro06	9743232	A	G	GTCAGACTAGTGACAGCAGGAATGCCAGAAGGGAATCGGCCTGATTCATTGAAGCTTTATCTTCATCCAGTTTTCCAGAACTATATTTTCGAAAATATAC[A/G]GTACGTATTACGTAATTGGAACTAAATATCTAATATTACTTGCATATCTAGTCCTGTACTAGGAGAAAAAAAGTATGTTTTCCGCATGTAAATAGAAAAA
Ro06-9802654	Ro06	9802654	T	A	TTTTCTAATCCACGCTATGGTACAGCAGCTTCTTGTGGCTATATACTTAGTTGATCAAATGATTGCATGTGTTATATGTCGATTGATCATTAATGCGTTC[T/A]AGTGGAATTTTAGTGTTGGACTARTTACATTTATTCTTTCATGGCCTTACAGGCAAGGCTTTCGTTATATTTAAGTCATCGGATGCTGCTGAGTCTGCTA
Ro06-9802678	Ro06	9802678	A	G	GCAGCTTCTTGTGGCTATATACTTAGTTGATCAAATGATTGCATGTGTTATATGTCGATTGATCATTAATGCGTTCWAGTGGAATTTTAGTGTTGGACTA[A/G]TTACATTTATTCTTTCATGGCCTTACAGGCAAGGCTTTCGTTATATTTAAGTCATCGGATGCTGCTGAGTCTGCTATAGTTGAGTTAAATAGGAGATGCC
Ro06-9805978	Ro06	9805978	G	T	GAACATAGAAATTTTATTCACACATGACTAAATACCAGATACACACCCCATTATTAAGGAAGCTTCTCTAGTGAGGACCTCTTAAATGAGGACCATTTGA[G/T]GACTTTTTGATTAATGGTTGTGATATCTATTTTTCGATCACATCTCGAGAAATCAACTGTTCAATGTTAAGATATTCATGAGTAGATCACTTCTACAAAT
Ro06-9807965	Ro06	9807965	A	T	CAATAGAAAAAGATCTGCAATCAAATCTGATCTTGTTTCTTGTAATCCAACTACAATTCATTACTTCAAAAAGAAAAAAACTAGCAATAGTCTATTTAAT[A/T]AAGACCCTACAAACGAAATAAAACTAGTGGTTGTTACAGGGAGATTTTAATGGTTGTTACATACGTTTAAGTAAATTTGTCACCAATTTGGGTGAGGGGA
Ro06-9813039	Ro06	9813039	G	A	TACCACAAGTAAAATATCATCGATGATCAATTTAAGATCCAACACATTCATATGCATGTATTAGCTAGCTATAGTAAGCATATTGATATTGGGTACCCAT[G/A]CCTCTTCTAGGGCATCTATTGTCTCTTCCAGGACAATCATATCTCATAGATAAGTTATTTCGAGAATGTGGATATTTTTACTCATAACCTCATGCTGAGT
Ro06-9813329	Ro06	9813329	A	G	AATGATATTAGTCACTCCTCCCCCTAACGGCGGGAAGACCGTCTGATTTGACCATTTGCAGAATATGCATGTAAAGATAATGGATTTCAGATATTCATTG[A/G]TGGGTGGCGAGCCCAAACCAATWTTGGGTCAAAAATAATGTGTCACTTTCTCAATTTGATCATAATTGGTTGAGCCTATTTCTTAAAAACAAAATGATAC
Ro06-9813352	Ro06	9813352	T	A	CTAACGGCGGGAAGACCGTCTGATTTGACCATTTGCAGAATATGCATGTAAAGATAATGGATTTCAGATATTCATTGRTGGGTGGCGAGCCCAAACCAAT[T/A]TTGGGTCAAAAATAATGTGTCACTTTCTCAATTTGATCATAATTGGTTGAGCCTATTTCTTAAAAACAAAATGATACATATATTGTGGATAAAAATCTCA
Ro06-9816858	Ro06	9816858	G	A	GCAATTTTGCTTTCGATAATCATTGTTTTGCAGCGCGGGAGCATCCGGGTATGTTCTTTACGATTGATTAAGTTTTCCGCAAAATTTTCATTTCAATCGT[G/A]TATGAAAGAACCCTAGAGCGTACCTGGGACGCATTTAAGATACTAGGTTGGTGCCCAGATGAAATTTACTTCTCACTTGGCTGTTGAGTGATCACATGAT
Ro06-9824225	Ro06	9824225	G	A	GCAATGCTGGAGGCATGGCAGAGAAGATGAACGGCTGGGCATGTGATGGGAAGTCGGCGGCGCGGCTTGAGGCGGTCGAAGCTGGGCTCGCGGCAAAACA[G/A]CGACGGCGTGGAATTGAGCGATGGTGGCCTCTGGCGGTGGTGATTGAGTCGCCGACGATGGACTRGATATCTGGATTTGGGTGAGCTCGGGGCCGAGAGG
Ro06-9824290	Ro06	9824290	G	A	CTTGAGGCGGTCGAAGCTGGGCTCGCGGCAAAACARCGACGGCGTGGAATTGAGCGATGGTGGCCTCTGGCGGTGGTGATTGAGTCGCCGACGATGGACT[G/A]GATATCTGGATTTGGGTGAGCTCGGGGCCGAGAGGAGAGAGATCGGTGGTCTCTGTGAATTGCAAGTGGTGGCTGGGCAGAGAATGACGCCGGAGAGGGG
Ro06-9841808	Ro06	9841808	C	A	GCATCTTTTGGGTATAAGCTGATTAATGAATCAGGATTCCACTATCACGGTGCTCAAGTTCTAAATCAAGGCAAAACCGTGTCTTCCCAAGATCTTTCAT[C/A]TCAAACTCGGATTTCAAGCATTCAGCGGTRTCTCTTAGYTCATYAAGAGTACCAATAATGTTCATGTCATCAACATAAACCGCGACAATTGCGAATCCGG
Ro06-9841838	Ro06	9841838	G	A	TCAGGATTCCACTATCACGGTGCTCAAGTTCTAAATCAAGGCAAAACCGTGTCTTCCCAAGATCTTTCATMTCAAACTCGGATTTCAAGCATTCAGCGGT[G/A]TCTCTTAGYTCATYAAGAGTACCAATAATGTTCATGTCATCAACATAAACCGCGACAATTGCGAATCCGGAACTTGTGTTTTTAATGAACACACATGGGC
Ro06-9841847	Ro06	9841847	T	C	CACTATCACGGTGCTCAAGTTCTAAATCAAGGCAAAACCGTGTCTTCCCAAGATCTTTCATMTCAAACTCGGATTTCAAGCATTCAGCGGTRTCTCTTAG[T/C]TCATYAAGAGTACCAATAATGTTCATGTCATCAACATAAACCGCGACAATTGCGAATCCGGAACTTGTGTTTTTAATGAACACACATGGGCATAAATCAT
Ro06-9841852	Ro06	9841852	C	T	TCACGGTGCTCAAGTTCTAAATCAAGGCAAAACCGTGTCTTCCCAAGATCTTTCATMTCAAACTCGGATTTCAAGCATTCAGCGGTRTCTCTTAGYTCAT[C/T]AAGAGTACCAATAATGTTCATGTCATCAACATAAACCGCGACAATTGCGAATCCGGAACTTGTGTTTTTAATGAACACACATGGGCATAAATCATTGTTC
Ro06-9876642	Ro06	9876642	A	G	CTATGTATATTAGTATATATATGGGCATTAAGTTATCCAAACCACTTGATGGCATCTCCAACCCAACAAAATACCTATTTTGAGTCCAAAATGTTCTCCA[A/G]CCCAACAAAATTCAGACCCAAGTCTTGGATTATTCCTAGASTTGGACTCAAACTCAGACTTATTCTGAGTSCAGACCCAAAACAAATCAGCGGGCCACAC
Ro06-9876683	Ro06	9876683	C	G	CCACTTGATGGCATCTCCAACCCAACAAAATACCTATTTTGAGTCCAAAATGTTCTCCARCCCAACAAAATTCAGACCCAAGTCTTGGATTATTCCTAGA[C/G]TTGGACTCAAACTCAGACTTATTCTGAGTSCAGACCCAAAACAAATCAGCGGGCCACACACCACACATGCATTGCTGACGTCAAGGGAAGAGAAGAATAG
Ro06-9876713	Ro06	9876713	C	G	TACCTATTTTGAGTCCAAAATGTTCTCCARCCCAACAAAATTCAGACCCAAGTCTTGGATTATTCCTAGASTTGGACTCAAACTCAGACTTATTCTGAGT[C/G]CAGACCCAAAACAAATCAGCGGGCCACACACCACACATGCATTGCTGACGTCAAGGGAAGAGAAGAATAGAGGCCCAAAGGTAWGAAGAAATGAAGGGCC
Ro06-9876797	Ro06	9876797	A	T	CAGACTTATTCTGAGTSCAGACCCAAAACAAATCAGCGGGCCACACACCACACATGCATTGCTGACGTCAAGGGAAGAGAAGAATAGAGGCCCAAAGGTA[A/T]GAAGAAATGAAGGGCCAAGATCAGTCCATTTCAAAATGGATGGTCGACCTAGTTTATATTGGTTTATACTAATATAATATGACCAAATTAACCAAAAAAA
Ro06-9906232	Ro06	9906232	A	T	CATGGTCTTTTCTTATGTATCTTCATACCATGCTATGGTTCACAAAGTCTCTTAATCTAGACAACTTAAGCCATGCTATGGTTCTCAAATTGCTAAACTA[A/T]GGCAATGGGCACTAAGACCTAGGGATTCAAACAAGACAAGCTCATCACATCCATTGCCAATTGTCTAGAGAGAATAAGGTTATCATRCTCACAATCTCTA
Ro06-9906319	Ro06	9906319	G	A	AATTGCTAAACTAWGGCAATGGGCACTAAGACCTAGGGATTCAAACAAGACAAGCTCATCACATCCATTGCCAATTGTCTAGAGAGAATAAGGTTATCAT[G/A]CTCACAATCTCTACCAAAATAGATTAAACACATGCTTTTAGAAGTGATAAAGTTCCTAGACATGCATCTAACACATATTAAAATAGGCAACAAGCATACC
Ro06-9907641	Ro06	9907641	C	T	TCTTGTAATCTTGGTGCTCCAAAGTCACGGTTGACTTTTGGCCTCTTCTCGGAAATGCTCCATAAGCTCCCAAATTACATCTTTAAGCTCCAAATTACTT[C/T]AACTCACTTATTCAACTTAAAAACAAYRCAAAYRCACATTAGTGATTTATTTGGCTCTTGGAGAAGCATTATCCAAGTAGTTAGAARCATGTTTTGTACG
Ro06-9907668	Ro06	9907668	C	T	CGGTTGACTTTTGGCCTCTTCTCGGAAATGCTCCATAAGCTCCCAAATTACATCTTTAAGCTCCAAATTACTTYAACTCACTTATTCAACTTAAAAACAA[C/T]RCAAAYRCACATTAGTGATTTATTTGGCTCTTGGAGAAGCATTATCCAAGTAGTTAGAARCATGTTTTGTACGTAAATTACGTGCAAATCAGCTGGATAC
Ro06-9907669	Ro06	9907669	A	G	GGTTGACTTTTGGCCTCTTCTCGGAAATGCTCCATAAGCTCCCAAATTACATCTTTAAGCTCCAAATTACTTYAACTCACTTATTCAACTTAAAAACAAY[A/G]CAAAYRCACATTAGTGATTTATTTGGCTCTTGGAGAAGCATTATCCAAGTAGTTAGAARCATGTTTTGTACGTAAATTACGTGCAAATCAGCTGGATACT
Ro06-9907674	Ro06	9907674	C	T	ACTTTTGGCCTCTTCTCGGAAATGCTCCATAAGCTCCCAAATTACATCTTTAAGCTCCAAATTACTTYAACTCACTTATTCAACTTAAAAACAAYRCAAA[C/T]RCACATTAGTGATTTATTTGGCTCTTGGAGAAGCATTATCCAAGTAGTTAGAARCATGTTTTGTACGTAAATTACGTGCAAATCAGCTGGATACTTCTGT
Ro06-9907675	Ro06	9907675	A	G	CTTTTGGCCTCTTCTCGGAAATGCTCCATAAGCTCCCAAATTACATCTTTAAGCTCCAAATTACTTYAACTCACTTATTCAACTTAAAAACAAYRCAAAY[A/G]CACATTAGTGATTTATTTGGCTCTTGGAGAAGCATTATCCAAGTAGTTAGAARCATGTTTTGTACGTAAATTACGTGCAAATCAGCTGGATACTTCTGTG
Ro06-9907728	Ro06	9907728	G	A	CTCCAAATTACTTYAACTCACTTATTCAACTTAAAAACAAYRCAAAYRCACATTAGTGATTTATTTGGCTCTTGGAGAAGCATTATCCAAGTAGTTAGAA[G/A]CATGTTTTGTACGTAAATTACGTGCAAATCAGCTGGATACTTCTGTGTGCACATTCTTCATAGCTGCTCTATTGGCCTCATCCTTACGAACATAAGTMAA
Ro06-9907826	Ro06	9907826	C	A	AARCATGTTTTGTACGTAAATTACGTGCAAATCAGCTGGATACTTCTGTGTGCACATTCTTCATAGCTGCTCTATTGGCCTCATCCTTACGAACATAAGT[C/A]AAGGCTTGTTCAACTGTTGGTGGTTGGACCAGATGGAGGAGTTCCCCCTTTACACCATCCAGAGATGAATCAAGTCTATTGAGGAAGATATGTGTCACGA
Ro06-9909288	Ro06	9909288	C	T	CTTAAGTAGATAAATCACATAATCAAGTTAATTACCAGGTAAGCATGTGATAACTCAAAACAATATATACTTCCATACATGTTAACATACATGTATAATA[C/T]TAAGTTGATGTATTCACTTAGTAARCAAGAYYAGGCACCAATATAAGATTAGTAGATAATCAAGTGCAAGYAAAACACATATAAARTGAGGCATATGTAA
Ro06-9909313	Ro06	9909313	A	G	AGTTAATTACCAGGTAAGCATGTGATAACTCAAAACAATATATACTTCCATACATGTTAACATACATGTATAATAYTAAGTTGATGTATTCACTTAGTAA[A/G]CAAGAYYAGGCACCAATATAAGATTAGTAGATAATCAAGTGCAAGYAAAACACATATAAARTGAGGCATATGTAAAACARGATATACATATGTTCATAAA
Ro06-9909319	Ro06	9909319	T	C	TTACCAGGTAAGCATGTGATAACTCAAAACAATATATACTTCCATACATGTTAACATACATGTATAATAYTAAGTTGATGTATTCACTTAGTAARCAAGA[T/C]YAGGCACCAATATAAGATTAGTAGATAATCAAGTGCAAGYAAAACACATATAAARTGAGGCATATGTAAAACARGATATACATATGTTCATAAACACAAA
Ro06-9909320	Ro06	9909320	C	T	TACCAGGTAAGCATGTGATAACTCAAAACAATATATACTTCCATACATGTTAACATACATGTATAATAYTAAGTTGATGTATTCACTTAGTAARCAAGAY[C/T]AGGCACCAATATAAGATTAGTAGATAATCAAGTGCAAGYAAAACACATATAAARTGAGGCATATGTAAAACARGATATACATATGTTCATAAACACAAAA
Ro06-9909359	Ro06	9909359	C	T	TCCATACATGTTAACATACATGTATAATAYTAAGTTGATGTATTCACTTAGTAARCAAGAYYAGGCACCAATATAAGATTAGTAGATAATCAAGTGCAAG[C/T]AAAACACATATAAARTGAGGCATATGTAAAACARGATATACATATGTTCATAAACACAAAACATAAGTAAATGAACTCATGTAATAAGCAAGATCATCAA
Ro06-9909374	Ro06	9909374	A	G	ATACATGTATAATAYTAAGTTGATGTATTCACTTAGTAARCAAGAYYAGGCACCAATATAAGATTAGTAGATAATCAAGTGCAAGYAAAACACATATAAA[A/G]TGAGGCATATGTAAAACARGATATACATATGTTCATAAACACAAAACATAAGTAAATGAACTCATGTAATAAGCAAGATCATCAACATAAGGTTAATAGC
Ro06-9909393	Ro06	9909393	G	A	TTGATGTATTCACTTAGTAARCAAGAYYAGGCACCAATATAAGATTAGTAGATAATCAAGTGCAAGYAAAACACATATAAARTGAGGCATATGTAAAACA[G/A]GATATACATATGTTCATAAACACAAAACATAAGTAAATGAACTCATGTAATAAGCAAGATCATCAACATAAGGTTAATAGCATAACCAAGTAAGTTATTG
Ro06-9927137	Ro06	9927137	G	A	CCATCTGGTACGCATAAAACGGTTGATTGAGAATTGGTCTGAAACGAATAAGTAAAGCTGCATGCGATATTGCATAACCCCAAGCAGATAATAGGAGATT[G/A]GTGCGCATAACCAATGTCCAAGCGACCATKTAAAATCTKTTAATGGTGGCTTCTGCGAGACCATTTTGTGTATGCACATGRGGTACGAGATATTTACTTT
Ro06-9927167	Ro06	9927167	T	G	GAATTGGTCTGAAACGAATAAGTAAAGCTGCATGCGATATTGCATAACCCCAAGCAGATAATAGGAGATTRGTGCGCATAACCAATGTCCAAGCGACCAT[T/G]TAAAATCTKTTAATGGTGGCTTCTGCGAGACCATTTTGTGTATGCACATGRGGTACGAGATATTTACTTTAATCCCAATAAATATGCAATAATCATCAAA
Ro06-9927176	Ro06	9927176	T	G	TGAAACGAATAAGTAAAGCTGCATGCGATATTGCATAACCCCAAGCAGATAATAGGAGATTRGTGCGCATAACCAATGTCCAAGCGACCATKTAAAATCT[T/G]TTAATGGTGGCTTCTGCGAGACCATTTTGTGTATGCACATGRGGTACGAGATATTTACTTTAATCCCAATAAATATGCAATAATCATCAAACTTCTGTGA
Ro06-9927218	Ro06	9927218	G	A	AAGCAGATAATAGGAGATTRGTGCGCATAACCAATGTCCAAGCGACCATKTAAAATCTKTTAATGGTGGCTTCTGCGAGACCATTTTGTGTATGCACATG[G/A]GGTACGAGATATTTACTTTAATCCCAATAAATATGCAATAATCATCAAACTTCTGTGATGTAAACTCTCTAGCATTGTCAAGACATATTTGACATAATAT
Ro06-9952587	Ro06	9952587	T	G	CCAAAAGGTATGAACCCACTGTTCATTCAAAATCAAAGTACCCAGTAGCCAATTACATGTCCACAAGGAGATTATCTAAGTCATATGAATCATTTGTGAA[T/G]CAAATATCTRTTGTATCARTACCTAAMAAAGTGCAGGATGCGTYGGGAGATCCAAAGTGGAGGAAGGCAATGGAGGAAGAAATGGAGGCATTGCAGAAGA
Ro06-9952597	Ro06	9952597	G	A	TGAACCCACTGTTCATTCAAAATCAAAGTACCCAGTAGCCAATTACATGTCCACAAGGAGATTATCTAAGTCATATGAATCATTTGTGAAKCAAATATCT[G/A]TTGTATCARTACCTAAMAAAGTGCAGGATGCGTYGGGAGATCCAAAGTGGAGGAAGGCAATGGAGGAAGAAATGGAGGCATTGCAGAAGAATAATACCTG
Ro06-9952606	Ro06	9952606	G	A	TGTTCATTCAAAATCAAAGTACCCAGTAGCCAATTACATGTCCACAAGGAGATTATCTAAGTCATATGAATCATTTGTGAAKCAAATATCTRTTGTATCA[G/A]TACCTAAMAAAGTGCAGGATGCGTYGGGAGATCCAAAGTGGAGGAAGGCAATGGAGGAAGAAATGGAGGCATTGCAGAAGAATAATACCTGGCAGCTTGT
Ro06-9952614	Ro06	9952614	C	A	CAAAATCAAAGTACCCAGTAGCCAATTACATGTCCACAAGGAGATTATCTAAGTCATATGAATCATTTGTGAAKCAAATATCTRTTGTATCARTACCTAA[C/A]AAAGTGCAGGATGCGTYGGGAGATCCAAAGTGGAGGAAGGCAATGGAGGAAGAAATGGAGGCATTGCAGAAGAATAATACCTGGCAGCTTGTCCCTCCAC
Ro06-9952631	Ro06	9952631	T	C	GTAGCCAATTACATGTCCACAAGGAGATTATCTAAGTCATATGAATCATTTGTGAAKCAAATATCTRTTGTATCARTACCTAAMAAAGTGCAGGATGCGT[T/C]GGGAGATCCAAAGTGGAGGAAGGCAATGGAGGAAGAAATGGAGGCATTGCAGAAGAATAATACCTGGCAGCTTGTCCCTCCACCACAAGGCAAGAAGGTT
Ro06-9953026	Ro06	9953026	G	C	ACAGTTTGATGTCAAGAATGCATTTCTTCATGGAGAGTTAGCTGAAGAGGTTTACATGGATCTTCCACCAGGGTATGTAGTAGCTTCTCCTGGTGATTTT[G/C]TATGCARATTGAGAAAAWCTTTGTATRGACTCAAACARTCACCYCGTGCTTGGTTTGRGAGGTTTTCACAATTCATGCAGAARTTTGGTTACATGCAAGG
Ro06-9953033	Ro06	9953033	A	G	GATGTCAAGAATGCATTTCTTCATGGAGAGTTAGCTGAAGAGGTTTACATGGATCTTCCACCAGGGTATGTAGTAGCTTCTCCTGGTGATTTTSTATGCA[A/G]ATTGAGAAAAWCTTTGTATRGACTCAAACARTCACCYCGTGCTTGGTTTGRGAGGTTTTCACAATTCATGCAGAARTTTGGTTACATGCAAGGTAACTCA
Ro06-9953044	Ro06	9953044	T	A	TGCATTTCTTCATGGAGAGTTAGCTGAAGAGGTTTACATGGATCTTCCACCAGGGTATGTAGTAGCTTCTCCTGGTGATTTTSTATGCARATTGAGAAAA[T/A]CTTTGTATRGACTCAAACARTCACCYCGTGCTTGGTTTGRGAGGTTTTCACAATTCATGCAGAARTTTGGTTACATGCAAGGTAACTCAGACCATACCTT
[truncated: 46,116 more rows]

## Sheet:  file S2a Black Jewel Map
file S2a:
[truncated: 101 more rows]

[truncated: 3 more sheets:  file S2b GlenAmple Map, file S3a, file S3b]
